# Supplementary material for: Xenbase: Facilitating the Use of Xenopus to Model Human Disease
Source: Front Physiol. 2019 Feb 26;10:154. doi: 10.3389/fphys.2019.00154 (PMC6399412; doi:10.3389/fphys.2019.00154)
Supplement: Supplementary file 1 [file Table_1.XLSX]

## Sheet: References for Diseases
High level DO term	(All)
DO Term	XB-ART-ID	Pubmed ID	Reference	Sum of Category count
abetalipoproteinemia	XB-ART-21964	8111381	Shoulders, C.C., Brett, D.J., Bayliss, J.D., Narcisi, T.M., Jarmuz, A., Grantham, T.T., et al. (1993). Abetalipoproteinemia is caused by defects of the gene encoding the 97 kDa subunit of a microsomal triglyceride transfer protein. Hum Mol Genet 2(12), 2109-2116.	1
achromatopsia 2	XB-ART-48170	23552282	Dai, G., and Varnum, M.D. (2013). CNGA3 achromatopsia-associated mutation potentiates the phosphoinositide sensitivity of cone photoreceptor CNG channels by altering intersubunit interactions. Am J Physiol Cell Physiol 305(2), C147-159. doi: 10.1152/ajpcell.00037.2013.	2
achromatopsia 3	XB-ART-47275	23805033	Liu, C., Sherpa, T., and Varnum, M.D. (2013). Disease-associated mutations in CNGB3 promote cytotoxicity in photoreceptor-derived cells. Mol Vis 19, 1268-1281.	2
acute leukemia	XB-ART-7659	11840327	Davis, R.L., and Turner, D.L. (2001). Vertebrate hairy and Enhancer of split related proteins: transcriptional repressors regulating cellular differentiation and embryonic patterning. Oncogene 20(58), 8342-8357. doi: 10.1038/sj.onc.1205094.	3
acute myeloid leukemia	XB-ART-40836	19808676	Li, Y., Trojer, P., Xu, C.F., Cheung, P., Kuo, A., Drury, W.J., 3rd, et al. (2009). The target of the NSD family of histone lysine methyltransferases depends on the nature of the substrate. J Biol Chem 284(49), 34283-34295. doi: 10.1074/jbc.M109.034462.	3
adrenocortical carcinoma	XB-ART-50865	26102711	Xu, S., Hardege, I., Murthy, M., Gordon, R., Stowasser, M., and O'Shaughnessy, K. (2015). 9B.03: A NOVEL INSERTIONAL SOMATIC KCNJ5 MUTATION IN AN AUSTRALIAN PATIENT WITH AN ALDOSTERONE PRODUCING ADENOMA. J Hypertens 33 Suppl 1, e120. doi: 10.1097/01.hjh.0000467675.16684.bb.	2
adult spinal muscular atrophy	XB-ART-39884	19517146	Ymlahi-Ouazzani, Q., O, J.B., Paillard, E., Ballagny, C., Chesneau, A., Jadaud, A., et al. (2010). Reduced levels of survival motor neuron protein leads to aberrant motoneuron growth in a Xenopus model of muscular atrophy. Neurogenetics 11(1), 27-40. doi: 10.1007/s10048-009-0200-6.	1
alcohol dependence	XB-ART-44312	22072732	Johnson, W.D., 2nd, Howard, R.J., Trudell, J.R., and Harris, R.A. (2012). The TM2 6' position of GABA(A) receptors mediates alcohol inhibition. J Pharmacol Exp Ther 340(2), 445-456. doi: 10.1124/jpet.111.188037.	1
alcohol use disorder	XB-ART-48499	24451653	Asatryan, L., Yardley, M.M., Khoja, S., Trudell, J.R., Hyunh, N., Louie, S.G., et al. (2014). Avermectins differentially affect ethanol intake and receptor function: implications for developing new therapeutics for alcohol use disorders. Int J Neuropsychopharmacol 17(6), 907-916. doi: 10.1017/S1461145713001703.	1
alcohol-related birth defect	XB-ART-3428	15193293	Peng, Y., Yang, P.H., Ng, S.S., Wong, O.G., Liu, J., He, M.L., et al. (2004). A critical role of Pax6 in alcohol-induced fetal microcephaly. Neurobiol Dis 16(2), 370-376. doi: 10.1016/j.nbd.2004.03.004.	1
	XB-ART-4230	14691149	Peng, Y., Yang, P.H., Guo, Y., Ng, S.S., Liu, J., Fung, P.C., et al. (2004). Catalase and peroxiredoxin 5 protect Xenopus embryos against alcohol-induced ocular anomalies. Invest Ophthalmol Vis Sci 45(1), 23-29.	1
Allan-Herndon-Dudley syndrome	XB-ART-51950	26368820	Braun, D., and Schweizer, U. (2015). Efficient Activation of Pathogenic DeltaPhe501 Mutation in Monocarboxylate Transporter 8 by Chemical and Pharmacological Chaperones. Endocrinology 156(12), 4720-4730. doi: 10.1210/en.2015-1393.	1
allergic rhinitis	XB-ART-51512	26546975	Bhattacharya, D., Marfo, C.A., Li, D., Lane, M., and Khokha, M.K. (2015). CRISPR/Cas9: An inexpensive, efficient loss of function tool to screen human disease genes in Xenopus. Dev Biol 408(2), 196-204. doi: 10.1016/j.ydbio.2015.11.003.	1
alternating hemiplegia of childhood	XB-ART-50159	25681536	Li, M., Jazayeri, D., Corry, B., McSweeney, K.M., Heinzen, E.L., Goldstein, D.B., et al. (2015). A functional correlate of severity in alternating hemiplegia of childhood. Neurobiol Dis 77, 88-93. doi: 10.1016/j.nbd.2015.02.002.	1
Alzheimer's disease	XB-ART-13764	9864273	Meyer, E.M., Kuryatov, A., Gerzanich, V., Lindstrom, J., and Papke, R.L. (1998). Analysis of 3-(4-hydroxy, 2-Methoxybenzylidene)anabaseine selectivity and activity at human and rat alpha-7 nicotinic receptors. J Pharmacol Exp Ther 287(3), 918-925.	1
	XB-ART-16144	9309189	Robey, E. (1997). Notch in vertebrates. Curr Opin Genet Dev 7(4), 551-557.	1
	XB-ART-1977	15858066	Hurst, R.S., Hajos, M., Raggenbass, M., Wall, T.M., Higdon, N.R., Lawson, J.A., et al. (2005). A novel positive allosteric modulator of the alpha7 neuronal nicotinic acetylcholine receptor: in vitro and in vivo characterization. J Neurosci 25(17), 4396-4405. doi: 10.1523/jneurosci.5269-04.2005.	1
	XB-ART-2546	15615643	Lee, V.M., Kenyon, T.K., and Trojanowski, J.Q. (2005). Transgenic animal models of tauopathies. Biochim Biophys Acta 1739(2-3), 251-259. doi: 10.1016/j.bbadis.2004.06.014.	1
	XB-ART-36616	17937488	Shen, L., and Ji, H.F. (2007). Rat's trick to escape Alzheimer's disease. J Biomol Struct Dyn 25(3), 271-274. doi: 10.1080/07391102.2007.10507175.	1
	XB-ART-4036	14749517	Miledi, R., Duenas, Z., Martinez-Torres, A., Kawas, C.H., and Eusebi, F. (2004). Microtransplantation of functional receptors and channels from the Alzheimer's brain to frog oocytes. Proc Natl Acad Sci U S A 101(6), 1760-1763. doi: 10.1073/pnas.0308224100.	1
	XB-ART-41002	20077426	Rauschenberger, K., Scholer, K., Sass, J.O., Sauer, S., Djuric, Z., Rumig, C., et al. (2010). A non-enzymatic function of 17beta-hydroxysteroid dehydrogenase type 10 is required for mitochondrial integrity and cell survival. EMBO Mol Med 2(2), 51-62. doi: 10.1002/emmm.200900055.	1
	XB-ART-43142	21159751	Johnstone, T.B., Gu, Z., Yoshimura, R.F., Villegier, A.S., Hogenkamp, D.J., Whittemore, E.R., et al. (2011). Allosteric modulation of related ligand-gated ion channels synergistically induces long-term potentiation in the hippocampus and enhances cognition. J Pharmacol Exp Ther 336(3), 908-915. doi: 10.1124/jpet.110.176255.	1
	XB-ART-46160	23104436	Parodi, J., Ochoa-de la Paz, L., Miledi, R., and Martinez-Torres, A. (2012). Functional and structural effects of amyloid-beta aggregate on Xenopus laevis oocytes. Mol Cells 34(4), 349-355. doi: 10.1007/s10059-012-2247-8.	1
	XB-ART-46440	23271055	Jinwal, U.K., Akoury, E., Abisambra, J.F., O'Leary, J.C., 3rd, Thompson, A.D., Blair, L.J., et al. (2013). Imbalance of Hsp70 family variants fosters tau accumulation. Faseb j 27(4), 1450-1459. doi: 10.1096/fj.12-220889.	1
	XB-ART-49607	25386646	Vingtdeux, V., Tanis, J.E., Chandakkar, P., Zhao, H., Dreses-Werringloer, U., Campagne, F., et al. (2014). Effect of the CALHM1 G330D and R154H human variants on the control of cytosolic Ca2+ and Abeta levels. PLoS One 9(11), e112484. doi: 10.1371/journal.pone.0112484.	1
	XB-ART-50115	25503389	Terry, A.V., Jr., Callahan, P.M., and Bertrand, D. (2015). R-(+) and S-(-) isomers of cotinine augment cholinergic responses in vitro and in vivo. J Pharmacol Exp Ther 352(2), 405-418. doi: 10.1124/jpet.114.219881.	1
	XB-ART-51258	26348728	Ullah, G., Demuro, A., Parker, I., and Pearson, J.E. (2015). Analyzing and Modeling the Kinetics of Amyloid Beta Pores Associated with Alzheimer's Disease Pathology. PLoS One 10(9), e0137357. doi: 10.1371/journal.pone.0137357.	1
	XB-ART-51328	25047445	Parodi, J., Ormeno, D., and Ochoa-de la Paz, L.D. (2015). Amyloid pore-channel hypothesis: effect of ethanol on aggregation state using frog oocytes for an Alzheimer's disease study. BMB Rep 48(1), 13-18.	1
	XB-ART-5802	12562926	Grassi, F., Palma, E., Tonini, R., Amici, M., Ballivet, M., and Eusebi, F. (2003). Amyloid beta(1-42) peptide alters the gating of human and mouse alpha-bungarotoxin-sensitive nicotinic receptors. J Physiol 547(Pt 1), 147-157. doi: 10.1113/jphysiol.2002.035436.	1
	XB-ART-6220	12423251	Delobel, P., Flament, S., Hamdane, M., Mailliot, C., Sambo, A.V., Begard, S., et al. (2002). Abnormal Tau phosphorylation of the Alzheimer-type also occurs during mitosis. J Neurochem 83(2), 412-420.	1
	XB-ART-7300	11959122	Delobel, P., Flament, S., Hamdane, M., Delacourte, A., Vilain, J.P., and Buee, L. (2002). Modelling Alzheimer-specific abnormal Tau phosphorylation independently of GSK3beta and PKA kinase activities. FEBS Lett 516(1-3), 151-155.	1
	XB-ART-7959	11744158	van den Hurk, W.H., Bloemen, M., and Martens, G.J. (2001). Expression of the gene encoding the beta-amyloid precursor protein APP in Xenopus laevis. Brain Res Mol Brain Res 97(1), 13-20.	1
amino acid metabolic disorder	XB-ART-41002	20077426	Rauschenberger, K., Scholer, K., Sass, J.O., Sauer, S., Djuric, Z., Rumig, C., et al. (2010). A non-enzymatic function of 17beta-hydroxysteroid dehydrogenase type 10 is required for mitochondrial integrity and cell survival. EMBO Mol Med 2(2), 51-62. doi: 10.1002/emmm.200900055.	1
amyotrophic lateral sclerosis	XB-ART-51921	26929355	Palma, E., Reyes-Ruiz, J.M., Lopergolo, D., Roseti, C., Bertollini, C., Ruffolo, G., et al. (2016). Acetylcholine receptors from human muscle as pharmacological targets for ALS therapy. Proc Natl Acad Sci U S A 113(11), 3060-3065. doi: 10.1073/pnas.1600251113.	1
Andersen-Tawil syndrome	XB-ART-520	16571646	Lu, C.W., Lin, J.H., Rajawat, Y.S., Jerng, H., Rami, T.G., Sanchez, X., et al. (2006). Functional and clinical characterization of a mutation in KCNJ2 associated with Andersen-Tawil syndrome. J Med Genet 43(8), 653-659. doi: 10.1136/jmg.2006.040816.	1
	XB-ART-52782	12163457	Tristani-Firouzi, M., Jensen, J.L., Donaldson, M.R., Sansone, V., Meola, G., Hahn, A., et al. (2002). Functional and clinical characterization of KCNJ2 mutations associated with LQT7 (Andersen syndrome). J Clin Invest 110(3), 381-388. doi: 10.1172/jci15183.	1
	XB-ART-53080	28255527	Dubey, A., and Saint-Jeannet, J.P. (2017). Modeling human craniofacial disorders in Xenopus. Curr Pathobiol Rep 5(1), 79-92. doi: 10.1007/s40139-017-0128-8.	1
	XB-ART-7098	12032359	Preisig-Muller, R., Schlichthorl, G., Goerge, T., Heinen, S., Bruggemann, A., Rajan, S., et al. (2002). Heteromerization of Kir2.x potassium channels contributes to the phenotype of Andersen's syndrome. Proc Natl Acad Sci U S A 99(11), 7774-7779. doi: 10.1073/pnas.102609499.	1
aniridia	XB-ART-50364	25724657	Nakayama, T., Fisher, M., Nakajima, K., Odeleye, A.O., Zimmerman, K.B., Fish, M.B., et al. (2015). Xenopus pax6 mutants affect eye development and other organ systems, and have phenotypic similarities to human aniridia patients. Dev Biol 408(2), 328-344. doi: 10.1016/j.ydbio.2015.02.012.	2
asthma	XB-ART-43032	21183475	Dubaissi, E., and Papalopulu, N. (2011). Embryonic frog epidermis: a model for the study of cell-cell interactions in the development of mucociliary disease. Dis Model Mech 4(2), 179-192. doi: 10.1242/dmm.006494.	1
	XB-ART-54169	27120014	Forkuo, G.S., Guthrie, M.L., Yuan, N.Y., Nieman, A.N., Kodali, R., Jahan, R., et al. (2016). Development of GABAA Receptor Subtype-Selective Imidazobenzodiazepines as Novel Asthma Treatments. Mol Pharm 13(6), 2026-2038. doi: 10.1021/acs.molpharmaceut.6b00159.	1
ataxia telangiectasia	XB-ART-42952	21157431	Cosentino, C., Grieco, D., and Costanzo, V. (2011). ATM activates the pentose phosphate pathway promoting anti-oxidant defence and DNA repair. Embo j 30(3), 546-555. doi: 10.1038/emboj.2010.330.	1
atherosclerosis	XB-ART-36638	17021800	Hamill, O.P. (2006). Twenty odd years of stretch-sensitive channels. Pflugers Arch 453(3), 333-351. doi: 10.1007/s00424-006-0131-0.	1
atrial fibrillation	XB-ART-47799	24345461	Schmidt, C., Wiedmann, F., Tristram, F., Anand, P., Wenzel, W., Lugenbiel, P., et al. (2014). Cardiac expression and atrial fibrillation-associated remodeling of K(2)p2.1 (TREK-1) K(+) channels in a porcine model. Life Sci 97(2), 107-115. doi: 10.1016/j.lfs.2013.12.006.	1
	XB-ART-49740	24952150	Schmidt, C., Wiedmann, F., Langer, C., Tristram, F., Anand, P., Wenzel, W., et al. (2014). Cloning, functional characterization, and remodeling of K2P3.1 (TASK-1) potassium channels in a porcine model of atrial fibrillation and heart failure. Heart Rhythm 11(10), 1798-1805. doi: 10.1016/j.hrthm.2014.06.020.	1
	XB-ART-50167	25655935	Rinne, S., Kiper, A.K., Schlichthorl, G., Dittmann, S., Netter, M.F., Limberg, S.H., et al. (2015). TASK-1 and TASK-3 may form heterodimers in human atrial cardiomyocytes. J Mol Cell Cardiol 81, 71-80. doi: 10.1016/j.yjmcc.2015.01.017.	1
atrial heart septal defect 4	XB-ART-40303	19812323	Lambert, F.M., Malinvaud, D., Glaunes, J., Bergot, C., Straka, H., and Vidal, P.P. (2009). Vestibular asymmetry as the cause of idiopathic scoliosis: a possible answer from Xenopus. J Neurosci 29(40), 12477-12483. doi: 10.1523/jneurosci.2583-09.2009.	1
	XB-ART-40311	19802378	Bartlett, H.L., and Weeks, D.L. (2008). Lessons from the lily pad: Using Xenopus to understand heart disease. Drug Discov Today Dis Models 5(3), 141-146. doi: 10.1016/j.ddmod.2009.02.006.	1
atrophic gastritis	XB-ART-15954	9322508	Claeys, D., Saraga, E., Rossier, B.C., and Kraehenbuhl, J.P. (1997). Neonatal injection of native proton pump antigens induces autoimmune gastritis in mice. Gastroenterology 113(4), 1136-1145.	1
autism spectrum disorder	XB-ART-35330	17167233	Strutz-Seebohm, N., Korniychuk, G., Schwarz, R., Baltaev, R., Ureche, O.N., Mack, A.F., et al. (2006). Functional significance of the kainate receptor GluR6(M836I) mutation that is linked to autism. Cell Physiol Biochem 18(4-5), 287-294. doi: 10.1159/000097675.	1
	XB-ART-38145	18645182	Limon, A., Reyes-Ruiz, J.M., and Miledi, R. (2008). Microtransplantation of neurotransmitter receptors from postmortem autistic brains to Xenopus oocytes. Proc Natl Acad Sci U S A 105(31), 10973-10977. doi: 10.1073/pnas.0804386105.	1
	XB-ART-47372	23929939	Pratt, K.G., and Khakhalin, A.S. (2013). Modeling human neurodevelopmental disorders in the Xenopus tadpole: from mechanisms to therapeutic targets. Dis Model Mech 6(5), 1057-1065. doi: 10.1242/dmm.012138.	1
	XB-ART-50378	25698756	James, E.J., Gu, J., Ramirez-Vizcarrondo, C.M., Hasan, M., Truszkowski, T.L., Tan, Y., et al. (2015). Valproate-induced neurodevelopmental deficits in Xenopus laevis tadpoles. J Neurosci 35(7), 3218-3229. doi: 10.1523/jneurosci.4050-14.2015.	1
	XB-ART-50616	24794859	Ambrosini, E., Sicca, F., Brignone, M.S., D'Adamo, M.C., Napolitano, C., Servettini, I., et al. (2014). Genetically induced dysfunctions of Kir2.1 channels: implications for short QT3 syndrome and autism-epilepsy phenotype. Hum Mol Genet 23(18), 4875-4886. doi: 10.1093/hmg/ddu201.	1
	XB-ART-52341	27503008	Truszkowski, T.L., James, E.J., Hasan, M., Wishard, T.J., Liu, Z., Pratt, K.G., et al. (2016). Fragile X mental retardation protein knockdown in the developing Xenopus tadpole optic tectum results in enhanced feedforward inhibition and behavioral deficits. Neural Dev 11(1), 14. doi: 10.1186/s13064-016-0069-7.	1
	XB-ART-52421	27677466	Sicca, F., Ambrosini, E., Marchese, M., Sforna, L., Servettini, I., Valvo, G., et al. (2016). Gain-of-function defects of astrocytic Kir4.1 channels in children with autism spectrum disorders and epilepsy. Sci Rep 6, 34325. doi: 10.1038/srep34325.	1
autoimmune disease of cardiovascular system	XB-ART-9377	11257091	Xiao, G.Q., Hu, K., and Boutjdir, M. (2001). Direct inhibition of expressed cardiac l- and t-type calcium channels by igg from mothers whose children have congenital heart block. Circulation 103(11), 1599-1604.	1
autosomal dominant hypocalcemia	XB-ART-19547	7602378	Brown, E.M., Pollak, M., Chou, Y.H., Seidman, C.E., Seidman, J.G., and Hebert, S.C. (1995). The cloning of extracellular Ca(2+)-sensing receptors from parathyroid and kidney: molecular mechanisms of extracellular Ca(2+)-sensing. J Nutr 125(7 Suppl), 1965s-1970s.	1
autosomal dominant keratitis-ichthyosis-deafness syndrome	XB-ART-46962	21933662	Scott, C.A., Tattersall, D., O'Toole, E.A., and Kelsell, D.P. (2012). Connexins in epidermal homeostasis and skin disease. Biochim Biophys Acta 1818(8), 1952-1961. doi: 10.1016/j.bbamem.2011.09.004.	1
	XB-ART-49438	25229253	Levit, N.A., Sellitto, C., Wang, H.Z., Li, L., Srinivas, M., Brink, P.R., et al. (2015). Aberrant connexin26 hemichannels underlying keratitis-ichthyosis-deafness syndrome are potently inhibited by mefloquine. J Invest Dermatol 135(4), 1033-1042. doi: 10.1038/jid.2014.408.	1
	XB-ART-49919	23797420	Lopez, W., Gonzalez, J., Liu, Y., Harris, A.L., and Contreras, J.E. (2013). Insights on the mechanisms of Ca(2+) regulation of connexin26 hemichannels revealed by human pathogenic mutations (D50N/Y). J Gen Physiol 142(1), 23-35. doi: 10.1085/jgp.201210893.	1
autosomal dominant nocturnal frontal lobe epilepsy	XB-ART-42414	21091316	Steinlein, O.K. (2010). Animal models for autosomal dominant frontal lobe epilepsy: on the origin of seizures. Expert Rev Neurother 10(12), 1859-1867. doi: 10.1586/ern.10.130.	1
	XB-ART-51551	26561946	Weltzin, M.M., Lindstrom, J.M., Lukas, R.J., and Whiteaker, P. (2016). Distinctive effects of nicotinic receptor intracellular-loop mutations associated with nocturnal frontal lobe epilepsy. Neuropharmacology 102, 158-173. doi: 10.1016/j.neuropharm.2015.11.004.	1
	XB-ART-52513	27336596	Nichols, W.A., Henderson, B.J., Marotta, C.B., Yu, C.Y., Richards, C., Dougherty, D.A., et al. (2016). Mutation Linked to Autosomal Dominant Nocturnal Frontal Lobe Epilepsy Reduces Low-Sensitivity alpha4beta2, and Increases alpha5alpha4beta2, Nicotinic Receptor Surface Expression. PLoS One 11(6), e0158032. doi: 10.1371/journal.pone.0158032.	1
autosomal dominant nocturnal frontal lobe epilepsy 5	XB-ART-54329	29196579	McTague, A., Nair, U., Malhotra, S., Meyer, E., Trump, N., Gazina, E.V., et al. (2018). Clinical and molecular characterization of KCNT1-related severe early-onset epilepsy. Neurology 90(1), e55-e66. doi: 10.1212/WNL.0000000000004762.	1
autosomal dominant nonsyndromic deafness 2A	XB-ART-13502	10025409	Kubisch, C., Schroeder, B.C., Friedrich, T., Lutjohann, B., El-Amraoui, A., Marlin, S., et al. (1999). KCNQ4, a novel potassium channel expressed in sensory outer hair cells, is mutated in dominant deafness. Cell 96(3), 437-446.	2
autosomal dominant nonsyndromic deafness 3A	XB-ART-3316	15241677	Mese, G., Londin, E., Mui, R., Brink, P.R., and White, T.W. (2004). Altered gating properties of functional Cx26 mutants associated with recessive non-syndromic hearing loss. Hum Genet 115(3), 191-199. doi: 10.1007/s00439-004-1142-6.	2
	XB-ART-41225	20201936	Tekin, M., Xia, X.J., Erdenetungalag, R., Cengiz, F.B., White, T.W., Radnaabazar, J., et al. (2010). GJB2 mutations in Mongolia: complex alleles, low frequency, and reduced fitness of the deaf. Ann Hum Genet 74(2), 155-164. doi: 10.1111/j.1469-1809.2010.00564.x.	2
autosomal dominant non-syndromic intellectual disability 7	XB-ART-42235	20981014	Ogawa, Y., Nonaka, Y., Goto, T., Ohnishi, E., Hiramatsu, T., Kii, I., et al. (2010). Development of a novel selective inhibitor of the Down syndrome-related kinase Dyrk1A. Nat Commun 1, 86. doi: 10.1038/ncomms1090.	1
autosomal dominant Parkinson's disease 8	XB-ART-54215	28697798	Salasova, A., Yokota, C., Potesil, D., Zdrahal, Z., Bryja, V., and Arenas, E. (2017). A proteomic analysis of LRRK2 binding partners reveals interactions with multiple signaling components of the WNT/PCP pathway. Mol Neurodegener 12(1), 54. doi: 10.1186/s13024-017-0193-9.	1
autosomal dominant polycystic kidney disease	XB-ART-12191	10517627	Emmons, S.W., and Somlo, S. (1999). Signal transduction. Mating, channels and kidney cysts. Nature 401(6751), 339-340. doi: 10.1038/43810.	2
	XB-ART-42033	20833712	Duning, K., Rosenbusch, D., Schluter, M.A., Tian, Y., Kunzelmann, K., Meyer, N., et al. (2010). Polycystin-2 activity is controlled by transcriptional coactivator with PDZ binding motif and PALS1-associated tight junction protein. J Biol Chem 285(44), 33584-33588. doi: 10.1074/jbc.C110.146381.	2
	XB-ART-47285	23793029	Hoff, S., Halbritter, J., Epting, D., Frank, V., Nguyen, T.M., van Reeuwijk, J., et al. (2013). ANKS6 is a central component of a nephronophthisis module linking NEK8 to INVS and NPHP3. Nat Genet 45(8), 951-956. doi: 10.1038/ng.2681.	2
	XB-ART-51813	26851624	Lienkamp, S.S. (2016). Using Xenopus to study genetic kidney diseases. Semin Cell Dev Biol 51, 117-124. doi: 10.1016/j.semcdb.2016.02.002.	2
	XB-ART-54159	28620080	Feng, S., Streets, A.J., Nesin, V., Tran, U., Nie, H., Onopiuk, M., et al. (2017). The Sorting Nexin 3 Retromer Pathway Regulates the Cell Surface Localization and Activity of a Wnt-Activated Polycystin Channel Complex. J Am Soc Nephrol 28(10), 2973-2984. doi: 10.1681/ASN.2016121349.	2
autosomal dominant pseudohypoaldosteronism type 1	XB-ART-37963	18326490	Lu, M., Echeverri, F., Kalabat, D., Laita, B., Dahan, D.S., Smith, R.D., et al. (2008). Small molecule activator of the human epithelial sodium channel. J Biol Chem 283(18), 11981-11994. doi: 10.1074/jbc.M708001200.	1
autosomal recessive cutis laxa type IIB	XB-ART-40177	19648921	Reversade, B., Escande-Beillard, N., Dimopoulou, A., Fischer, B., Chng, S.C., Li, Y., et al. (2009). Mutations in PYCR1 cause cutis laxa with progeroid features. Nat Genet 41(9), 1016-1021. doi: 10.1038/ng.413.	1
autosomal recessive nonsyndromic deafness	XB-ART-3805	15033936	Skerrett, I.M., Di, W.L., Kasperek, E.M., Kelsell, D.P., and Nicholson, B.J. (2004). Aberrant gating, but a normal expression pattern, underlies the recessive phenotype of the deafness mutant Connexin26M34T. Faseb j 18(7), 860-862. doi: 10.1096/fj.03-0763fje.	2
	XB-ART-41225	20201936	Tekin, M., Xia, X.J., Erdenetungalag, R., Cengiz, F.B., White, T.W., Radnaabazar, J., et al. (2010). GJB2 mutations in Mongolia: complex alleles, low frequency, and reduced fitness of the deaf. Ann Hum Genet 74(2), 155-164. doi: 10.1111/j.1469-1809.2010.00564.x.	2
autosomal recessive nonsyndromic deafness 1A	XB-ART-41225	20201936	Tekin, M., Xia, X.J., Erdenetungalag, R., Cengiz, F.B., White, T.W., Radnaabazar, J., et al. (2010). GJB2 mutations in Mongolia: complex alleles, low frequency, and reduced fitness of the deaf. Ann Hum Genet 74(2), 155-164. doi: 10.1111/j.1469-1809.2010.00564.x.	2
autosomal recessive nonsyndromic deafness 4	XB-ART-39645	19420365	Bockenhauer, D., Feather, S., Stanescu, H.C., Bandulik, S., Zdebik, A.A., Reichold, M., et al. (2009). Epilepsy, ataxia, sensorineural deafness, tubulopathy, and KCNJ10 mutations. N Engl J Med 360(19), 1960-1970. doi: 10.1056/NEJMoa0810276.	2
	XB-ART-39897	19426954	Yang, T., Gurrola, J.G., 2nd, Wu, H., Chiu, S.M., Wangemann, P., Snyder, P.M., et al. (2009). Mutations of KCNJ10 together with mutations of SLC26A4 cause digenic nonsyndromic hearing loss associated with enlarged vestibular aqueduct syndrome. Am J Hum Genet 84(5), 651-657. doi: 10.1016/j.ajhg.2009.04.014.	2
autosomal recessive nonsyndromic deafness 8	XB-ART-1641	16021470	Wattenhofer, M., Sahin-Calapoglu, N., Andreasen, D., Kalay, E., Caylan, R., Braillard, B., et al. (2005). A novel TMPRSS3 missense mutation in a DFNB8/10 family prevents proteolytic activation of the protein. Hum Genet 117(6), 528-535. doi: 10.1007/s00439-005-1332-x.	2
	XB-ART-6337	12393794	Guipponi, M., Vuagniaux, G., Wattenhofer, M., Shibuya, K., Vazquez, M., Dougherty, L., et al. (2002). The transmembrane serine protease (TMPRSS3) mutated in deafness DFNB8/10 activates the epithelial sodium channel (ENaC) in vitro. Hum Mol Genet 11(23), 2829-2836.	2
autosomal recessive pseudohypoaldosteronism type 1	XB-ART-45358	22668601	Krumm, P., Giraldez, T., Alvarez de la Rosa, D., Clauss, W.G., Fronius, M., and Althaus, M. (2012). Thiol-reactive compounds from garlic inhibit the epithelial sodium channel (ENaC). Bioorg Med Chem 20(13), 3979-3984. doi: 10.1016/j.bmc.2012.05.021.	1
Axenfeld-Rieger syndrome type 1	XB-ART-40303	19812323	Lambert, F.M., Malinvaud, D., Glaunes, J., Bergot, C., Straka, H., and Vidal, P.P. (2009). Vestibular asymmetry as the cause of idiopathic scoliosis: a possible answer from Xenopus. J Neurosci 29(40), 12477-12483. doi: 10.1523/jneurosci.2583-09.2009.	1
	XB-ART-40311	19802378	Bartlett, H.L., and Weeks, D.L. (2008). Lessons from the lily pad: Using Xenopus to understand heart disease. Drug Discov Today Dis Models 5(3), 141-146. doi: 10.1016/j.ddmod.2009.02.006.	1
Bardet-Biedl syndrome	XB-ART-41813	20671153	Kim, S.K., Shindo, A., Park, T.J., Oh, E.C., Ghosh, S., Gray, R.S., et al. (2010). Planar cell polarity acts through septins to control collective cell movement and ciliogenesis. Science 329(5997), 1337-1340. doi: 10.1126/science.1191184.	1
	XB-ART-51813	26851624	Lienkamp, S.S. (2016). Using Xenopus to study genetic kidney diseases. Semin Cell Dev Biol 51, 117-124. doi: 10.1016/j.semcdb.2016.02.002.	1
Bardet-Biedl syndrome 12	XB-ART-41813	20671153	Kim, S.K., Shindo, A., Park, T.J., Oh, E.C., Ghosh, S., Gray, R.S., et al. (2010). Planar cell polarity acts through septins to control collective cell movement and ciliogenesis. Science 329(5997), 1337-1340. doi: 10.1126/science.1191184.	1
Bardet-Biedl syndrome 5	XB-ART-52543	26867008	Bolch, S.N., Dugger, D.R., Chong, T., McDowell, J.H., and Smith, W.C. (2016). A Splice Variant of Bardet-Biedl Syndrome 5 (BBS5) Protein that Is Selectively Expressed in Retina. PLoS One 11(2), e0148773. doi: 10.1371/journal.pone.0148773.	1
Bart-Pumphrey syndrome	XB-ART-46962	21933662	Scott, C.A., Tattersall, D., O'Toole, E.A., and Kelsell, D.P. (2012). Connexins in epidermal homeostasis and skin disease. Biochim Biophys Acta 1818(8), 1952-1961. doi: 10.1016/j.bbamem.2011.09.004.	1
Bartter disease	XB-ART-42014	20805576	Gradogna, A., Babini, E., Picollo, A., and Pusch, M. (2010). A regulatory calcium-binding site at the subunit interface of CLC-K kidney chloride channels. J Gen Physiol 136(3), 311-323. doi: 10.1085/jgp.201010455.	1
	XB-ART-48338	24400161	Srivastava, S., Li, D., Edwards, N., Hynes, A.M., Wood, K., Al-Hamed, M., et al. (2013). Identification of compound heterozygous KCNJ1 mutations (encoding ROMK) in a kindred with Bartter's syndrome and a functional analysis of their pathogenicity. Physiol Rep 1(6), e00160. doi: 10.1002/phy2.160.	1
	XB-ART-50701	24980796	Bollepalli, M.K., Fowler, P.W., Rapedius, M., Shang, L., Sansom, M.S., Tucker, S.J., et al. (2014). State-dependent network connectivity determines gating in a K+ channel. Structure 22(7), 1037-1046. doi: 10.1016/j.str.2014.04.018.	1
Bartter disease type 1	XB-ART-35036	17186942	Gimenez, I., and Forbush, B. (2007). The residues determining differences in ion affinities among the alternative splice variants F, A, and B of the mammalian renal Na-K-Cl cotransporter (NKCC2). J Biol Chem 282(9), 6540-6547. doi: 10.1074/jbc.M610780200.	1
Bartter disease type 2	XB-ART-38102	18620882	Lee, C.H., Huang, P.T., Lou, K.L., and Liou, H.H. (2008). Functional and structural characterization of PKA-mediated pHi gating of ROMK1 channels. J Mol Graph Model 27(3), 332-341. doi: 10.1016/j.jmgm.2008.06.001.	1
Bartter disease type 3	XB-ART-53605	28381550	Seys, E., Andrini, O., Keck, M., Mansour-Hendili, L., Courand, P.Y., Simian, C., et al. (2017). Clinical and Genetic Spectrum of Bartter Syndrome Type 3. J Am Soc Nephrol 28(8), 2540-2552. doi: 10.1681/asn.2016101057.	1
benign epilepsy with centrotemporal spikes	XB-ART-51334	23933819	Lemke, J.R., Lal, D., Reinthaler, E.M., Steiner, I., Nothnagel, M., Alber, M., et al. (2013). Mutations in GRIN2A cause idiopathic focal epilepsy with rolandic spikes. Nat Genet 45(9), 1067-1072. doi: 10.1038/ng.2728.	1
benign familial neonatal epilepsy	XB-ART-36793	18006581	Wuttke, T.V., Penzien, J., Fauler, M., Seebohm, G., Lehmann-Horn, F., Lerche, H., et al. (2008). Neutralization of a negative charge in the S1-S2 region of the KV7.2 (KCNQ2) channel affects voltage-dependent activation in neonatal epilepsy. J Physiol 586(2), 545-555. doi: 10.1113/jphysiol.2007.143826.	1
	XB-ART-52669	27781029	Maljevic, S., Vejzovic, S., Bernhard, M.K., Bertsche, A., Weise, S., Docker, M., et al. (2016). Novel KCNQ3 Mutation in a Large Family with Benign Familial Neonatal Epilepsy: A Rare Cause of Neonatal Seizures. Mol Syndromol 7(4), 189-196. doi: 10.1159/000447461.	1
benign neonatal seizures	XB-ART-38	16916607	Hunter, J., Maljevic, S., Shankar, A., Siegel, A., Weissman, B., Holt, P., et al. (2006). Subthreshold changes of voltage-dependent activation of the K(V)7.2 channel in neonatal epilepsy. Neurobiol Dis 24(1), 194-201. doi: 10.1016/j.nbd.2006.06.011.	1
	XB-ART-51549	11015449	Felix, R. (2000). Channelopathies: ion channel defects linked to heritable clinical disorders. J Med Genet 37(10), 729-740.	1
beta thalassemia	XB-ART-51890	26920202	Refaat, M.M., El Hage, L., Steffensen, A.B., Hotait, M., Schmitt, N., Scheinman, M., et al. (2016). Iron Overload Leading to Torsades de Pointes in beta-Thalassemia and Long QT Syndrome. Card Electrophysiol Clin 8(1), 247-256. doi: 10.1016/j.ccep.2015.10.037.	1
bile duct disease	XB-ART-37804	18509604	Ghibellini, G., Leslie, E.M., Pollack, G.M., and Brouwer, K.L. (2008). Use of tc-99m mebrofenin as a clinical probe to assess altered hepatobiliary transport: integration of in vitro, pharmacokinetic modeling, and simulation studies. Pharm Res 25(8), 1851-1860. doi: 10.1007/s11095-008-9597-0.	1
bilirubin metabolic disorder	XB-ART-37804	18509604	Ghibellini, G., Leslie, E.M., Pollack, G.M., and Brouwer, K.L. (2008). Use of tc-99m mebrofenin as a clinical probe to assess altered hepatobiliary transport: integration of in vitro, pharmacokinetic modeling, and simulation studies. Pharm Res 25(8), 1851-1860. doi: 10.1007/s11095-008-9597-0.	1
blindness	XB-ART-4762	12949901	McLachlan, E., White, T.W., Ugonabo, C., Olson, C., Nagy, J.I., and Valdimarsson, G. (2003). Zebrafish Cx35: cloning and characterization of a gap junction gene highly expressed in the retina. J Neurosci Res 73(6), 753-764. doi: 10.1002/jnr.10712.	2
bone development disease	XB-ART-51476	26170305	Loukin, S.H., Teng, J., and Kung, C. (2015). A channelopathy mechanism revealed by direct calmodulin activation of TrpV4. Proc Natl Acad Sci U S A 112(30), 9400-9405. doi: 10.1073/pnas.1510602112.	1
bone marrow disease	xb-art-3257	15262960	Leveille, F., Blom, E., Medhurst, A.L., Bier, P., Laghmani el, H., Johnson, M., et al. (2004). The Fanconi anemia gene product FANCF is a flexible adaptor protein. J Biol Chem 279(38), 39421-39430. doi: 10.1074/jbc.M407034200.	1
	xb-art-36130	17584296	Stone, S., Sobeck, A., van Kogelenberg, M., de Graaf, B., Joenje, H., Christian, J., et al. (2007). Identification, developmental expression and regulation of the Xenopus ortholog of human FANCG/XRCC9. Genes Cells 12(7), 841-851. doi: 10.1111/j.1365-2443.2007.01096.x.	1
	xb-art-40788	20043851	Landais, I., Hiddingh, S., McCarroll, M., Yang, C., Sun, A., Turker, M.S., et al. (2009). Monoketone analogs of curcumin, a new class of Fanconi anemia pathway inhibitors. Mol Cancer 8, 133. doi: 10.1186/1476-4598-8-133.	1
	xb-art-46414	22753026	Sareen, A., Chaudhury, I., Adams, N., and Sobeck, A. (2012). Fanconi anemia proteins FANCD2 and FANCI exhibit different DNA damage responses during S-phase. Nucleic Acids Res 40(17), 8425-8439. doi: 10.1093/nar/gks638.	1
	xb-art-890	16382135	Sobeck, A., Stone, S., Costanzo, V., de Graaf, B., Reuter, T., de Winter, J., et al. (2006). Fanconi anemia proteins are required to prevent accumulation of replication-associated DNA double-strand breaks. Mol Cell Biol 26(2), 425-437. doi: 10.1128/MCB.26.2.425-437.2006.	1
Bowen-Conradi syndrome	XB-ART-52667	27784267	Robson, A., Owens, N.D., Baserga, S.J., Khokha, M.K., and Griffin, J.N. (2016). Expression of ribosomopathy genes during Xenopus tropicalis embryogenesis. BMC Dev Biol 16(1), 38. doi: 10.1186/s12861-016-0138-5.	1
brachyolmia	XB-ART-41715	20605796	Loukin, S., Zhou, X., Su, Z., Saimi, Y., and Kung, C. (2010). Wild-type and brachyolmia-causing mutant TRPV4 channels respond directly to stretch force. J Biol Chem 285(35), 27176-27181. doi: 10.1074/jbc.M110.143370.	1
brain disease	XB-ART-54172	29053855	Niturad, C.E., Lev, D., Kalscheuer, V.M., Charzewska, A., Schubert, J., Lerman-Sagie, T., et al. (2017). Rare GABRA3 variants are associated with epileptic seizures, encephalopathy and dysmorphic features. Brain 140(11), 2879-2894. doi: 10.1093/brain/awx236.	1
	XB-ART-7300	11959122	Delobel, P., Flament, S., Hamdane, M., Delacourte, A., Vilain, J.P., and Buee, L. (2002). Modelling Alzheimer-specific abnormal Tau phosphorylation independently of GSK3beta and PKA kinase activities. FEBS Lett 516(1-3), 151-155.	1
	XB-ART-7959	11744158	van den Hurk, W.H., Bloemen, M., and Martens, G.J. (2001). Expression of the gene encoding the beta-amyloid precursor protein APP in Xenopus laevis. Brain Res Mol Brain Res 97(1), 13-20.	1
branchiootic syndrome	XB-ART-42372	21089078	Neilson, K.M., Pignoni, F., Yan, B., and Moody, S.A. (2010). Developmental expression patterns of candidate cofactors for vertebrate six family transcription factors. Dev Dyn 239(12), 3446-3466. doi: 10.1002/dvdy.22484.	0
branchiootorenal syndrome	XB-ART-40756	19951260	Li, Y., Manaligod, J.M., and Weeks, D.L. (2010). EYA1 mutations associated with the branchio-oto-renal syndrome result in defective otic development in Xenopus laevis. Biol Cell 102(5), 277-292. doi: 10.1042/bc20090098.	1
	XB-ART-51813	26851624	Lienkamp, S.S. (2016). Using Xenopus to study genetic kidney diseases. Semin Cell Dev Biol 51, 117-124. doi: 10.1016/j.semcdb.2016.02.002.	1
	XB-ART-52838	27940157	Neilson, K.M., Abbruzzesse, G., Kenyon, K., Bartolo, V., Krohn, P., Alfandari, D., et al. (2017). Pa2G4 is a novel Six1 co-factor that is required for neural crest and otic development. Dev Biol 421(2), 171-182. doi: 10.1016/j.ydbio.2016.11.021.	1
breast cancer	XB-ART-3332	15235020	Abkevich, V., Zharkikh, A., Deffenbaugh, A.M., Frank, D., Chen, Y., Shattuck, D., et al. (2004). Analysis of missense variation in human BRCA1 in the context of interspecific sequence variation. J Med Genet 41(7), 492-507.	1
	XB-ART-40564	19892884	Cross, M.K., and Powers, M.A. (2009). Learning about cancer from frogs: analysis of mitotic spindles in Xenopus egg extracts. Dis Model Mech 2(11-12), 541-547. doi: 10.1242/dmm.002022.	1
	XB-ART-43237	21232089	Allegrucci, C., Rushton, M.D., Dixon, J.E., Sottile, V., Shah, M., Kumari, R., et al. (2011). Epigenetic reprogramming of breast cancer cells with oocyte extracts. Mol Cancer 10(1), 7. doi: 10.1186/1476-4598-10-7.	1
	XB-ART-52202	26754771	Puvirajesinghe, T.M., Bertucci, F., Jain, A., Scerbo, P., Belotti, E., Audebert, S., et al. (2016). Identification of p62/SQSTM1 as a component of non-canonical Wnt VANGL2-JNK signalling in breast cancer. Nat Commun 7, 10318. doi: 10.1038/ncomms10318.	1
bronchiectasis	XB-ART-47655	24272871	Bakouh, N., Bienvenu, T., Thomas, A., Ehrenfeld, J., Liote, H., Roussel, D., et al. (2013). Characterization of SLC26A9 in patients with CF-like lung disease. Hum Mutat 34(10), 1404-1414. doi: 10.1002/humu.22382.	1
Brugada syndrome 1	XB-ART-8843	11420310	Baroudi, G., Pouliot, V., Denjoy, I., Guicheney, P., Shrier, A., and Chahine, M. (2001). Novel mechanism for Brugada syndrome: defective surface localization of an SCN5A mutant (R1432G). Circ Res 88(12), E78-83.	1
Burkitt lymphoma	XB-ART-36109	17597761	Dominguez-Sola, D., Ying, C.Y., Grandori, C., Ruggiero, L., Chen, B., Li, M., et al. (2007). Non-transcriptional control of DNA replication by c-Myc. Nature 448(7152), 445-451. doi: 10.1038/nature05953.	3
CADASIL	XB-ART-16144	9309189	Robey, E. (1997). Notch in vertebrates. Curr Opin Genet Dev 7(4), 551-557.	1
CAKUT	XB-ART-51813	26851624	Lienkamp, S.S. (2016). Using Xenopus to study genetic kidney diseases. Semin Cell Dev Biol 51, 117-124. doi: 10.1016/j.semcdb.2016.02.002.	1
campomelic dysplasia	XB-ART-52781	21309066	Lee, Y.H., and Saint-Jeannet, J.P. (2011). Sox9 function in craniofacial development and disease. Genesis 49(4), 200-208. doi: 10.1002/dvg.20717.	1
	XB-ART-53080	28255527	Dubey, A., and Saint-Jeannet, J.P. (2017). Modeling human craniofacial disorders in Xenopus. Curr Pathobiol Rep 5(1), 79-92. doi: 10.1007/s40139-017-0128-8.	1
cancer	XB-ART-11204	10766861	Gao, B., Sekido, Y., Maximov, A., Saad, M., Forgacs, E., Latif, F., et al. (2000). Functional properties of a new voltage-dependent calcium channel alpha(2)delta auxiliary subunit gene (CACNA2D2). J Biol Chem 275(16), 12237-12242.	1
	XB-ART-15119	9561843	Attisano, L., and Wrana, J.L. (1998). Mads and Smads in TGF beta signalling. Curr Opin Cell Biol 10(2), 188-194.	1
	XB-ART-15784	9368757	Wallingford, J.B., Seufert, D.W., Virta, V.C., and Vize, P.D. (1997). p53 activity is essential for normal development in Xenopus. Curr Biol 7(10), 747-757.	1
	XB-ART-2032	15824131	Kops, G.J., Kim, Y., Weaver, B.A., Mao, Y., McLeod, I., Yates, J.R., 3rd, et al. (2005). ZW10 links mitotic checkpoint signaling to the structural kinetochore. J Cell Biol 169(1), 49-60. doi: 10.1083/jcb.200411118.	1
	XB-ART-34813	17081976	Joukov, V., Groen, A.C., Prokhorova, T., Gerson, R., White, E., Rodriguez, A., et al. (2006). The BRCA1/BARD1 heterodimer modulates ran-dependent mitotic spindle assembly. Cell 127(3), 539-552. doi: 10.1016/j.cell.2006.08.053.	1
	XB-ART-35784	17458498	Makinen, T., Norrmen, C., and Petrova, T.V. (2007). Molecular mechanisms of lymphatic vascular development. Cell Mol Life Sci 64(15), 1915-1929. doi: 10.1007/s00018-007-7040-z.	1
	XB-ART-36432	17127309	Chien, A.J., and Moon, R.T. (2007). WNTS and WNT receptors as therapeutic tools and targets in human disease processes. Front Biosci 12, 448-457.	1
	XB-ART-36638	17021800	Hamill, O.P. (2006). Twenty odd years of stretch-sensitive channels. Pflugers Arch 453(3), 333-351. doi: 10.1007/s00424-006-0131-0.	1
	XB-ART-373	16683072	Janssens, N., Janicot, M., and Perera, T. (2006). The Wnt-dependent signaling pathways as target in oncology drug discovery. Invest New Drugs 24(4), 263-280. doi: 10.1007/s10637-005-5199-4.	1
	XB-ART-39785	19478043	Kalin, R.E., Banziger-Tobler, N.E., Detmar, M., and Brandli, A.W. (2009). An in vivo chemical library screen in Xenopus tadpoles reveals novel pathways involved in angiogenesis and lymphangiogenesis. Blood 114(5), 1110-1122. doi: 10.1182/blood-2009-03-211771.	1
	XB-ART-40564	19892884	Cross, M.K., and Powers, M.A. (2009). Learning about cancer from frogs: analysis of mitotic spindles in Xenopus egg extracts. Dis Model Mech 2(11-12), 541-547. doi: 10.1242/dmm.002022.	1
	XB-ART-41874	20704574	Yang, H.S., Zhang, D.M., Deng, H.X., Peng, F., and Wei, Y.Q. (2010). Antitumor and anti-angiogenesis immunity induced by CR-SEREX-identified Xenopus RHAMM. Cancer Sci 101(4), 862-868. doi: 10.1111/j.1349-7006.2009.01473.x.	1
	XB-ART-42113	20889723	Willemarck, N., Rysman, E., Brusselmans, K., Van Imschoot, G., Vanderhoydonc, F., Moerloose, K., et al. (2010). Aberrant activation of fatty acid synthesis suppresses primary cilium formation and distorts tissue development. Cancer Res 70(22), 9453-9462. doi: 10.1158/0008-5472.Can-10-2324.	1
	XB-ART-42622	21224042	Peixoto, P.M., Lue, J.K., Ryu, S.Y., Wroble, B.N., Sible, J.C., and Kinnally, K.W. (2011). Mitochondrial apoptosis-induced channel (MAC) function triggers a Bax/Bak-dependent bystander effect. Am J Pathol 178(1), 48-54. doi: 10.1016/j.ajpath.2010.11.014.	1
	XB-ART-43445	21707509	Fonar, Y., and Frank, D. (2011). FAK and WNT signaling: the meeting of two pathways in cancer and development. Anticancer Agents Med Chem 11(7), 600-606.	1
	XB-ART-438	16619017	De Smet, F., Carmeliet, P., and Autiero, M. (2006). Fishing and frogging for anti-angiogenic drugs. Nat Chem Biol 2(5), 228-229. doi: 10.1038/nchembio0506-228.	1
	XB-ART-44918	22393397	Harney, A.S., Meade, T.J., and LaBonne, C. (2012). Targeted inactivation of Snail family EMT regulatory factors by a Co(III)-Ebox conjugate. PLoS One 7(2), e32318. doi: 10.1371/journal.pone.0032318.	1
	XB-ART-45150	22507445	Nutt, L.K. (2012). The Xenopus oocyte: a model for studying the metabolic regulation of cancer cell death. Semin Cell Dev Biol 23(4), 412-418. doi: 10.1016/j.semcdb.2012.03.015.	1
	XB-ART-45265	22526416	Berg, J., Yang, H., and Jan, L.Y. (2012). Ca2+-activated Cl- channels at a glance. J Cell Sci 125(Pt 6), 1367-1371. doi: 10.1242/jcs.093260.	1
	XB-ART-46254	23196890	Lobikin, M., Chernet, B., Lobo, D., and Levin, M. (2012). Resting potential, oncogene-induced tumorigenesis, and metastasis: the bioelectric basis of cancer in vivo. Phys Biol 9(6), 065002. doi: 10.1088/1478-3975/9/6/065002.	1
	XB-ART-46336	23226310	Khan, S., Rammeloo, A.W., and Heikkila, J.J. (2012). Withaferin A induces proteasome inhibition, endoplasmic reticulum stress, the heat shock response and acquisition of thermotolerance. PLoS One 7(11), e50547. doi: 10.1371/journal.pone.0050547.	1
	XB-ART-46781	23471912	Chernet, B.T., and Levin, M. (2013). Transmembrane voltage potential is an essential cellular parameter for the detection and control of tumor development in a Xenopus model. Dis Model Mech 6(3), 595-607. doi: 10.1242/dmm.010835.	1
	XB-ART-48893	24776220	Haynes-Gilmore, N., Banach, M., Edholm, E.S., Lord, E., and Robert, J. (2014). A critical role of non-classical MHC in tumor immune evasion in the amphibian Xenopus model. Carcinogenesis 35(8), 1807-1813. doi: 10.1093/carcin/bgu100.	1
	XB-ART-50073	25646081	Chernet, B.T., Fields, C., and Levin, M. (2014). Long-range gap junctional signaling controls oncogene-mediated tumorigenesis in Xenopus laevis embryos. Front Physiol 5, 519. doi: 10.3389/fphys.2014.00519.	1
	XB-ART-50089	25601449	Haynes-Gimore, N., Banach, M., Brown, E., Dawes, R., Edholm, E.S., Kim, M., et al. (2015). Semi-solid tumor model in Xenopus laevis/gilli cloned tadpoles for intravital study of neovascularization, immune cells and melanophore infiltration. Dev Biol 408(2), 205-212. doi: 10.1016/j.ydbio.2015.01.003.	1
	XB-ART-50376	25704511	Hardwick, L.J., and Philpott, A. (2015). An oncologists friend: How Xenopus contributes to cancer research. Dev Biol 408(2), 180-187. doi: 10.1016/j.ydbio.2015.02.003.	1
	XB-ART-51353	26443706	Lobikin, M., Lobo, D., Blackiston, D.J., Martyniuk, C.J., Tkachenko, E., and Levin, M. (2015). Serotonergic regulation of melanocyte conversion: A bioelectrically regulated network for stochastic all-or-none hyperpigmentation. Sci Signal 8(397), ra99. doi: 10.1126/scisignal.aac6609.	1
	XB-ART-51512	26546975	Bhattacharya, D., Marfo, C.A., Li, D., Lane, M., and Khokha, M.K. (2015). CRISPR/Cas9: An inexpensive, efficient loss of function tool to screen human disease genes in Xenopus. Dev Biol 408(2), 196-204. doi: 10.1016/j.ydbio.2015.11.003.	1
	XB-ART-51542	25417160	Gujral, T.S., Chan, M., Peshkin, L., Sorger, P.K., Kirschner, M.W., and MacBeath, G. (2014). A noncanonical Frizzled2 pathway regulates epithelial-mesenchymal transition and metastasis. Cell 159(4), 844-856. doi: 10.1016/j.cell.2014.10.032.	1
	XB-ART-51764	26749017	Wei, L., Tominaga, H., Ohgaki, R., Wiriyasermkul, P., Hagiwara, K., Okuda, S., et al. (2016). Specific transport of 3-fluoro-l-alpha-methyl-tyrosine by LAT1 explains its specificity to malignant tumors in imaging. Cancer Sci 107(3), 347-352. doi: 10.1111/cas.12878.	1
	XB-ART-51977	27019404	Tanaka, M., Kuriyama, S., Itoh, G., Kohyama, A., Iwabuchi, Y., Shibata, H., et al. (2016). Identification of anti-cancer chemical compounds using Xenopus embryos. Cancer Sci 107(6), 803-811. doi: 10.1111/cas.12940.	1
	XB-ART-53787	28634230	Zhang, Z., Lei, A., Xu, L., Chen, L., Chen, Y., Zhang, X., et al. (2017). Similarity in gene-regulatory networks suggests that cancer cells share characteristics of embryonic neural cells. J Biol Chem 292(31), 12842-12859. doi: 10.1074/jbc.M117.785865.	1
	XB-ART-54043	28927532	Kucinska, M., Murias, M., and Nowak-Sliwinska, P. (2017). Beyond mouse cancer models: Three-dimensional human-relevant in vitro and non-mammalian in vivo models for photodynamic therapy. Mutat Res 773, 242-262. doi: 10.1016/j.mrrev.2016.09.002.	1
	XB-ART-54123	28781123	Gardner, N.J., Gillespie, P.J., Carrington, J.T., Shanks, E.J., McElroy, S.P., Haagensen, E.J., et al. (2017). The High-Affinity Interaction between ORC and DNA that Is Required for Replication Licensing Is Inhibited by 2-Arylquinolin-4-Amines. Cell Chem Biol 24(8), 981-992.e984. doi: 10.1016/j.chembiol.2017.06.019.	1
	XB-ART-7834	11784023	Zohn, I.E., and Brivanlou, A.H. (2001). Expression cloning of Xenopus Os4, an evolutionarily conserved gene, which induces mesoderm and dorsal axis. Dev Biol 239(1), 118-131. doi: 10.1006/dbio.2001.0420.	1
cardiac arrest	XB-ART-54726	29582136	Chua, H.C., Servatius, H., Asatryan, B., Schaller, A., Rieubland, C., Noti, F., et al. (2018). Unexplained cardiac arrest: a tale of conflicting interpretations of KCNQ1 genetic test results. Clin Res Cardiol. doi: 10.1007/s00392-018-1233-3.	1
	XB-ART-8843	11420310	Baroudi, G., Pouliot, V., Denjoy, I., Guicheney, P., Shrier, A., and Chahine, M. (2001). Novel mechanism for Brugada syndrome: defective surface localization of an SCN5A mutant (R1432G). Circ Res 88(12), E78-83.	1
cardiomyopathy	XB-ART-39737	19450502	Schape, J., Prausse, S., Radmacher, M., and Stick, R. (2009). Influence of lamin A on the mechanical properties of amphibian oocyte nuclei measured by atomic force microscopy. Biophys J 96(10), 4319-4325. doi: 10.1016/j.bpj.2009.02.048.	1
	XB-ART-53117	28195132	Deniz, E., Jonas, S., Hooper, M., J, N.G., Choma, M.A., and Khokha, M.K. (2017). Analysis of Craniocardiac Malformations in Xenopus using Optical Coherence Tomography. Sci Rep 7, 42506. doi: 10.1038/srep42506.	1
cardiovascular system disease	XB-ART-13935	9825674	Ramsdell, A.F., and Yost, H.J. (1998). Molecular mechanisms of vertebrate left-right development. Trends Genet 14(11), 459-465.	1
	XB-ART-2862	15496402	Hertel, J., Struthers, H., Horj, C.B., and Hruz, P.W. (2004). A structural basis for the acute effects of HIV protease inhibitors on GLUT4 intrinsic activity. J Biol Chem 279(53), 55147-55152. doi: 10.1074/jbc.M410826200.	1
cataract	XB-ART-2902	15471865	Dinour, D., Chang, M.H., Satoh, J., Smith, B.L., Angle, N., Knecht, A., et al. (2004). A novel missense mutation in the sodium bicarbonate cotransporter (NBCe1/SLC4A4) causes proximal tubular acidosis and glaucoma through ion transport defects. J Biol Chem 279(50), 52238-52246. doi: 10.1074/jbc.M406591200.	2
	XB-ART-36792	18006672	Arora, A., Minogue, P.J., Liu, X., Addison, P.K., Russel-Eggitt, I., Webster, A.R., et al. (2008). A novel connexin50 mutation associated with congenital nuclear pulverulent cataracts. J Med Genet 45(3), 155-160. doi: 10.1136/jmg.2007.051029.	2
	XB-ART-43397	21689651	Maher, G.J., Hilton, E.N., Urquhart, J.E., Davidson, A.E., Spencer, H.L., Black, G.C., et al. (2011). The cataract-associated protein TMEM114, and TMEM235, are glycosylated transmembrane proteins that are distinct from claudin family members. FEBS Lett 585(14), 2187-2192. doi: 10.1016/j.febslet.2011.05.060.	2
	XB-ART-49929	23578822	Abplanalp, J., Laczko, E., Philp, N.J., Neidhardt, J., Zuercher, J., Braun, P., et al. (2013). The cataract and glucosuria associated monocarboxylate transporter MCT12 is a new creatine transporter. Hum Mol Genet 22(16), 3218-3226. doi: 10.1093/hmg/ddt175.	2
	XB-ART-54224	29088427	Staubli, A., Capatina, N., Fuhrer, Y., Munier, F.L., Labs, S., Schorderet, D.F., et al. (2017). Abnormal creatine transport of mutations in monocarboxylate transporter 12 (MCT12) found in patients with age-related cataract can be partially rescued by exogenous chaperone CD147. Hum Mol Genet 26(21), 4203-4214. doi: 10.1093/hmg/ddx310.	2
cataract 1 multiple types	XB-ART-12871	10362609	Pal, J.D., Berthoud, V.M., Beyer, E.C., Mackay, D., Shiels, A., and Ebihara, L. (1999). Molecular mechanism underlying a Cx50-linked congenital cataract. Am J Physiol 276(6 Pt 1), C1443-1446.	2
	XB-ART-875	16397066	Arora, A., Minogue, P.J., Liu, X., Reddy, M.A., Ainsworth, J.R., Bhattacharya, S.S., et al. (2006). A novel GJA8 mutation is associated with autosomal dominant lamellar pulverulent cataract: further evidence for gap junction dysfunction in human cataract. J Med Genet 43(1), e2. doi: 10.1136/jmg.2005.034108.	2
cataract 14 multiple types	XB-ART-4686	12975451	Kronengold, J., Trexler, E.B., Bukauskas, F.F., Bargiello, T.A., and Verselis, V.K. (2003). Single-channel SCAM identifies pore-lining residues in the first extracellular loop and first transmembrane domains of Cx46 hemichannels. J Gen Physiol 122(4), 389-405. doi: 10.1085/jgp.200308861.	2
	XB-ART-52073	26449341	Schadzek, P., Schlingmann, B., Schaarschmidt, F., Lindner, J., Koval, M., Heisterkamp, A., et al. (2016). The cataract related mutation N188T in human connexin46 (hCx46) revealed a critical role for residue N188 in the docking process of gap junction channels. Biochim Biophys Acta 1858(1), 57-66. doi: 10.1016/j.bbamem.2015.10.001.	2
cataract 15 multiple types	XB-ART-46206	23116563	Senthil Kumar, G., Kyle, J.W., Minogue, P.J., Dinesh Kumar, K., Vasantha, K., Berthoud, V.M., et al. (2013). An MIP/AQP0 mutation with impaired trafficking and function underlies an autosomal dominant congenital lamellar cataract. Exp Eye Res 110, 136-141. doi: 10.1016/j.exer.2012.10.010.	2
	XB-ART-47854	24120416	Kumari, S.S., Gandhi, J., Mustehsan, M.H., Eren, S., and Varadaraj, K. (2013). Functional characterization of an AQP0 missense mutation, R33C, that causes dominant congenital lens cataract, reveals impaired cell-to-cell adhesion. Exp Eye Res 116, 371-385. doi: 10.1016/j.exer.2013.09.019.	2
cataract 43	XB-ART-50951	25376491	Lee, C.F., Melkani, G.C., and Bernstein, S.I. (2014). The UNC-45 myosin chaperone: from worms to flies to vertebrates. Int Rev Cell Mol Biol 313, 103-144. doi: 10.1016/b978-0-12-800177-6.00004-9.	2
cataract 45	XB-ART-52888	27993984	Rothe, M., Kanwal, N., Dietmann, P., Seigfried, F.A., Hempel, A., Schutz, D., et al. (2017). An Epha4/Sipa1l3/Wnt pathway regulates eye development and lens maturation. Development 144(2), 321-333. doi: 10.1242/dev.147462.	2
central nervous system disease	XB-ART-35069	17166836	Goytain, A., Hines, R.M., El-Husseini, A., and Quamme, G.A. (2007). NIPA1(SPG6), the basis for autosomal dominant form of hereditary spastic paraplegia, encodes a functional Mg2+ transporter. J Biol Chem 282(11), 8060-8068. doi: 10.1074/jbc.M610314200.	1
	XB-ART-42729	20959364	Wallace, T.L., Callahan, P.M., Tehim, A., Bertrand, D., Tombaugh, G., Wang, S., et al. (2011). RG3487, a novel nicotinic alpha7 receptor partial agonist, improves cognition and sensorimotor gating in rodents. J Pharmacol Exp Ther 336(1), 242-253. doi: 10.1124/jpet.110.171892.	1
cerebellar ataxia	XB-ART-49198	24836863	Garcia Segarra, N., Gautschi, I., Mittaz-Crettol, L., Kallay Zetchi, C., Al-Qusairi, L., Van Bemmelen, M.X., et al. (2014). Congenital ataxia and hemiplegic migraine with cerebral edema associated with a novel gain of function mutation in the calcium channel CACNA1A. J Neurol Sci 342(1-2), 69-78. doi: 10.1016/j.jns.2014.04.027.	1
cerebrovascular disease	XB-ART-22829	7679115	Karp, S.J., Masu, M., Eki, T., Ozawa, K., and Nakanishi, S. (1993). Molecular cloning and chromosomal localization of the key subunit of the human N-methyl-D-aspartate receptor. J Biol Chem 268(5), 3728-3733.	2
Charcot-Marie-Tooth disease	XB-ART-4386	14627639	Abrams, C.K., Freidin, M., Bukauskas, F., Dobrenis, K., Bargiello, T.A., Verselis, V.K., et al. (2003). Pathogenesis of X-linked Charcot-Marie-Tooth disease: differential effects of two mutations in connexin 32. J Neurosci 23(33), 10548-10558.	2
	XB-ART-9124	11325342	Abrams, C.K., Freidin, M.M., Verselis, V.K., Bennett, M.V., and Bargiello, T.A. (2001). Functional alterations in gap junction channels formed by mutant forms of connexin 32: evidence for loss of function as a pathogenic mechanism in the X-linked form of Charcot-Marie-Tooth disease. Brain Res 900(1), 9-25.	2
Charcot-Marie-Tooth disease type 1B	XB-ART-8511	11519730	Yoshida, M., and Colma, D.R. (2001). Rapid functional analysis in Xenopus oocytes of Po protein adhesive interactions. Neurochem Res 26(6), 703-712.	2
Charcot-Marie-Tooth disease type X	XB-ART-9124	11325342	Abrams, C.K., Freidin, M.M., Verselis, V.K., Bennett, M.V., and Bargiello, T.A. (2001). Functional alterations in gap junction channels formed by mutant forms of connexin 32: evidence for loss of function as a pathogenic mechanism in the X-linked form of Charcot-Marie-Tooth disease. Brain Res 900(1), 9-25.	2
Charcot-Marie-Tooth disease X-linked dominant 1	XB-ART-9124	11325342	Abrams, C.K., Freidin, M.M., Verselis, V.K., Bennett, M.V., and Bargiello, T.A. (2001). Functional alterations in gap junction channels formed by mutant forms of connexin 32: evidence for loss of function as a pathogenic mechanism in the X-linked form of Charcot-Marie-Tooth disease. Brain Res 900(1), 9-25.	2
CHARGE syndrome	XB-ART-41075	20130577	Bajpai, R., Chen, D.A., Rada-Iglesias, A., Zhang, J., Xiong, Y., Helms, J., et al. (2010). CHD7 cooperates with PBAF to control multipotent neural crest formation. Nature 463(7283), 958-962. doi: 10.1038/nature08733.	0
	XB-ART-48818	24728844	Schulz, Y., Wehner, P., Opitz, L., Salinas-Riester, G., Bongers, E.M., van Ravenswaaij-Arts, C.M., et al. (2014). CHD7, the gene mutated in CHARGE syndrome, regulates genes involved in neural crest cell guidance. Hum Genet 133(8), 997-1009. doi: 10.1007/s00439-014-1444-2.	0
	XB-ART-51896	26910255	Duncan, A.R., and Khokha, M.K. (2016). Xenopus as a model organism for birth defects-Congenital heart disease and heterotaxy. Semin Cell Dev Biol 51, 73-79. doi: 10.1016/j.semcdb.2016.02.022.	0
	XB-ART-53080	28255527	Dubey, A., and Saint-Jeannet, J.P. (2017). Modeling human craniofacial disorders in Xenopus. Curr Pathobiol Rep 5(1), 79-92. doi: 10.1007/s40139-017-0128-8.	0
	XB-ART-54554	29432577	Ufartes, R., Schwenty-Lara, J., Freese, L., Neuhofer, C., Moller, J., Wehner, P., et al. (2018). Sema3a plays a role in the pathogenesis of CHARGE syndrome. Hum Mol Genet 27(8), 1343-1352. doi: 10.1093/hmg/ddy045.	0
childhood electroclinical syndrome	XB-ART-51334	23933819	Lemke, J.R., Lal, D., Reinthaler, E.M., Steiner, I., Nothnagel, M., Alber, M., et al. (2013). Mutations in GRIN2A cause idiopathic focal epilepsy with rolandic spikes. Nat Genet 45(9), 1067-1072. doi: 10.1038/ng.2728.	1
childhood onset GLUT1 deficiency syndrome 2	XB-ART-43588	21791420	Flatt, J.F., Guizouarn, H., Burton, N.M., Borgese, F., Tomlinson, R.J., Forsyth, R.J., et al. (2011). Stomatin-deficient cryohydrocytosis results from mutations in SLC2A1: a novel form of GLUT1 deficiency syndrome. Blood 118(19), 5267-5277. doi: 10.1182/blood-2010-12-326645.	1
cholera	XB-ART-11601	10646604	Schroeder, B.C., Waldegger, S., Fehr, S., Bleich, M., Warth, R., Greger, R., et al. (2000). A constitutively open potassium channel formed by KCNQ1 and KCNE3. Nature 403(6766), 196-199. doi: 10.1038/35003200.	1
cholestasis	XB-ART-37804	18509604	Ghibellini, G., Leslie, E.M., Pollack, G.M., and Brouwer, K.L. (2008). Use of tc-99m mebrofenin as a clinical probe to assess altered hepatobiliary transport: integration of in vitro, pharmacokinetic modeling, and simulation studies. Pharm Res 25(8), 1851-1860. doi: 10.1007/s11095-008-9597-0.	1
	XB-ART-42695	21278388	Nytofte, N.S., Serrano, M.A., Monte, M.J., Gonzalez-Sanchez, E., Tumer, Z., Ladefoged, K., et al. (2011). A homozygous nonsense mutation (c.214C->A) in the biliverdin reductase alpha gene (BLVRA) results in accumulation of biliverdin during episodes of cholestasis. J Med Genet 48(4), 219-225. doi: 10.1136/jmg.2009.074567.	1
	XB-ART-49699	25194674	Lieu, T., Jayaweera, G., Zhao, P., Poole, D.P., Jensen, D., Grace, M., et al. (2014). The bile acid receptor TGR5 activates the TRPA1 channel to induce itch in mice. Gastroenterology 147(6), 1417-1428. doi: 10.1053/j.gastro.2014.08.042.	1
choroid disease	XB-ART-22027	8291895	Hauptman, O., Albert, D.M., Plowman, M.C., Hopfer, S.M., and Sunderman, F.W., Jr. (1993). Ocular malformations of Xenopus laevis exposed to nickel during embryogenesis. Ann Clin Lab Sci 23(6), 397-406.	2
chromosome 15q26-qter deletion syndrome	XB-ART-47246	23773997	Lalani, S.R., Ware, S.M., Wang, X., Zapata, G., Tian, Q., Franco, L.M., et al. (2013). MCTP2 is a dosage-sensitive gene required for cardiac outflow tract development. Hum Mol Genet 22(21), 4339-4348. doi: 10.1093/hmg/ddt283.	1
chromosome 5q deletion syndrome	XB-ART-52667	27784267	Robson, A., Owens, N.D., Baserga, S.J., Khokha, M.K., and Griffin, J.N. (2016). Expression of ribosomopathy genes during Xenopus tropicalis embryogenesis. BMC Dev Biol 16(1), 38. doi: 10.1186/s12861-016-0138-5.	1
chronic obstructive pulmonary disease	XB-ART-43032	21183475	Dubaissi, E., and Papalopulu, N. (2011). Embryonic frog epidermis: a model for the study of cell-cell interactions in the development of mucociliary disease. Dis Model Mech 4(2), 179-192. doi: 10.1242/dmm.006494.	1
	XB-ART-53756	28592822	Stauffer, B.B., Cui, G., Cottrill, K.A., Infield, D.T., and McCarty, N.A. (2017). Bacterial Sphingomyelinase is a State-Dependent Inhibitor of the Cystic Fibrosis Transmembrane conductance Regulator (CFTR). Sci Rep 7(1), 2931. doi: 10.1038/s41598-017-03103-2.	1
ciliopathy	XB-ART-43125	21501571	Vincensini, L., Blisnick, T., and Bastin, P. (2011). [The importance of model organisms to study cilia and flagella biology]. Biol Aujourdhui 205(1), 5-28. doi: 10.1051/jbio/2011005.	1
	XB-ART-46091	22778277	Brooks, E.R., and Wallingford, J.B. (2012). Control of vertebrate intraflagellar transport by the planar cell polarity effector Fuz. J Cell Biol 198(1), 37-45. doi: 10.1083/jcb.201204072.	1
	XB-ART-48580	24530844	Manojlovic, Z., Earwood, R., Kato, A., Stefanovic, B., and Kato, Y. (2014). RFX7 is required for the formation of cilia in the neural tube. Mech Dev 132, 28-37. doi: 10.1016/j.mod.2014.02.001.	1
	XB-ART-48908	24747639	Wallmeier, J., Al-Mutairi, D.A., Chen, C.T., Loges, N.T., Pennekamp, P., Menchen, T., et al. (2014). Mutations in CCNO result in congenital mucociliary clearance disorder with reduced generation of multiple motile cilia. Nat Genet 46(6), 646-651. doi: 10.1038/ng.2961.	1
	XB-ART-49189	24970261	Lee, C., Wallingford, J.B., and Gross, J.M. (2014). Cluap1 is essential for ciliogenesis and photoreceptor maintenance in the vertebrate eye. Invest Ophthalmol Vis Sci 55(7), 4585-4592. doi: 10.1167/iovs.14-14888.	1
	XB-ART-50113	25516973	Epting, D., Slanchev, K., Boehlke, C., Hoff, S., Loges, N.T., Yasunaga, T., et al. (2015). The Rac1 regulator ELMO controls basal body migration and docking in multiciliated cells through interaction with Ezrin. Development 142(1), 174-184. doi: 10.1242/dev.112250.	1
	XB-ART-50846	26079437	Ossipova, O., Chu, C.W., Fillatre, J., Brott, B.K., Itoh, K., and Sokol, S.Y. (2015). The involvement of PCP proteins in radial cell intercalations during Xenopus embryonic development. Dev Biol 408(2), 316-327. doi: 10.1016/j.ydbio.2015.06.013.	1
	XB-ART-53182	28401306	Getwan, M., and Lienkamp, S.S. (2017). Toolbox in a tadpole: Xenopus for kidney research. Cell Tissue Res 369(1), 143-157. doi: 10.1007/s00441-017-2611-2.	1
	XB-ART-54092	27158779	Toriyama, M., Lee, C., Taylor, S.P., Duran, I., Cohn, D.H., Bruel, A.L., et al. (2016). The ciliopathy-associated CPLANE proteins direct basal body recruitment of intraflagellar transport machinery. Nat Genet 48(6), 648-656. doi: 10.1038/ng.3558.	1
cleft lip	XB-ART-54305	29162626	Lansdon, L.A., Darbro, B.W., Petrin, A.L., Hulstrand, A.M., Standley, J.M., Brouillette, R.B., et al. (2018). Identification of Isthmin 1 as a Novel Clefting and Craniofacial Patterning Gene in Humans. Genetics 208(1), 283-296. doi: 10.1534/genetics.117.300535.	1
cleft palate	XB-ART-54305	29162626	Lansdon, L.A., Darbro, B.W., Petrin, A.L., Hulstrand, A.M., Standley, J.M., Brouillette, R.B., et al. (2018). Identification of Isthmin 1 as a Novel Clefting and Craniofacial Patterning Gene in Humans. Genetics 208(1), 283-296. doi: 10.1534/genetics.117.300535.	1
Coffin-Siris syndrome	XB-ART-51518	26543203	Hempel, A., Pagnamenta, A.T., Blyth, M., Mansour, S., McConnell, V., Kou, I., et al. (2016). Deletions and de novo mutations of SOX11 are associated with a neurodevelopmental disorder with features of Coffin-Siris syndrome. J Med Genet 53(3), 152-162. doi: 10.1136/jmedgenet-2015-103393.	1
coloboma	XB-ART-22027	8291895	Hauptman, O., Albert, D.M., Plowman, M.C., Hopfer, S.M., and Sunderman, F.W., Jr. (1993). Ocular malformations of Xenopus laevis exposed to nickel during embryogenesis. Ann Clin Lab Sci 23(6), 397-406.	2
	Xb-ART-34383	17010201	Hanel, M.L., and Hensey, C. (2006). Eye and neural defects associated with loss of GDF6. BMC Dev Biol 6, 43. doi: 10.1186/1471-213X-6-43.	2
	XB-ART-47052	23669349	Lee, J., Lee, B.K., and Gross, J.M. (2013). Bcl6a function is required during optic cup formation to prevent p53-dependent apoptosis and colobomata. Hum Mol Genet 22(17), 3568-3582. doi: 10.1093/hmg/ddt211.	2
colon cancer	XB-ART-49632	25359775	Amado, N.G., Predes, D., Fonseca, B.F., Cerqueira, D.M., Reis, A.H., Dudenhoeffer, A.C., et al. (2014). Isoquercitrin suppresses colon cancer cell growth in vitro by targeting the Wnt/beta-catenin signaling pathway. J Biol Chem 289(51), 35456-35467. doi: 10.1074/jbc.M114.621599.	2
	XB-ART-50235	25775405	Fonseca, B.F., Predes, D., Cerqueira, D.M., Reis, A.H., Amado, N.G., Cayres, M.C., et al. (2015). Derricin and derricidin inhibit Wnt/beta-catenin signaling and suppress colon cancer cell growth in vitro. PLoS One 10(3), e0120919. doi: 10.1371/journal.pone.0120919.	2
colorectal cancer	XB-ART-39587	19395656	Pittman, A.M., Naranjo, S., Webb, E., Broderick, P., Lips, E.H., van Wezel, T., et al. (2009). The colorectal cancer risk at 18q21 is caused by a novel variant altering SMAD7 expression. Genome Res 19(6), 987-993. doi: 10.1101/gr.092668.109.	2
	XB-ART-50857	26097888	Van Nieuwenhuysen, T., Naert, T., Tran, H.T., Van Imschoot, G., Geurs, S., Sanders, E., et al. (2015). TALEN-mediated apc mutation in Xenopus tropicalis phenocopies familial adenomatous polyposis. Oncoscience 2(5), 555-566. doi: 10.18632/oncoscience.166.	2
cone dystrophy	XB-ART-46732	23115240	Smith, K.E., Wilkie, S.E., Tebbs-Warner, J.T., Jarvis, B.J., Gallasch, L., Stocker, M., et al. (2012). Functional analysis of missense mutations in Kv8.2 causing cone dystrophy with supernormal rod electroretinogram. J Biol Chem 287(52), 43972-43983. doi: 10.1074/jbc.M112.388033.	2
cone-rod dystrophy 3	XB-ART-1500	16103129	Wiszniewski, W., Zaremba, C.M., Yatsenko, A.N., Jamrich, M., Wensel, T.G., Lewis, R.A., et al. (2005). ABCA4 mutations causing mislocalization are found frequently in patients with severe retinal dystrophies. Hum Mol Genet 14(19), 2769-2778. doi: 10.1093/hmg/ddi310.	2
congenital heart block	XB-ART-9377	11257091	Xiao, G.Q., Hu, K., and Boutjdir, M. (2001). Direct inhibition of expressed cardiac l- and t-type calcium channels by igg from mothers whose children have congenital heart block. Circulation 103(11), 1599-1604.	1
congenital heart disease	XB-ART-3534	15148055	Bartlett, H.L., Scholz, T.D., Lamb, F.S., and Weeks, D.L. (2004). Characterization of embryonic cardiac pacemaker and atrioventricular conduction physiology in Xenopus laevis using noninvasive imaging. Am J Physiol Heart Circ Physiol 286(6), H2035-2041. doi: 10.1152/ajpheart.00807.2003.	1
	XB-ART-40311	19802378	Bartlett, H.L., and Weeks, D.L. (2008). Lessons from the lily pad: Using Xenopus to understand heart disease. Drug Discov Today Dis Models 5(3), 141-146. doi: 10.1016/j.ddmod.2009.02.006.	1
	XB-ART-41564	20460370	Mandel, E.M., Kaltenbrun, E., Callis, T.E., Zeng, X.X., Marques, S.R., Yelon, D., et al. (2010). The BMP pathway acts to directly regulate Tbx20 in the developing heart. Development 137(11), 1919-1929. doi: 10.1242/dev.043588.	1
	XB-ART-43199	21538812	Kaltenbrun, E., Tandon, P., Amin, N.M., Waldron, L., Showell, C., and Conlon, F.L. (2011). Xenopus: An emerging model for studying congenital heart disease. Birth Defects Res A Clin Mol Teratol 91(6), 495-510. doi: 10.1002/bdra.20793.	1
	XB-ART-43468	19967350	Bartlett, H., Veenstra, G.J., and Weeks, D.L. (2010). Examining the cardiac NK-2 genes in early heart development. Pediatr Cardiol 31(3), 335-341. doi: 10.1007/s00246-009-9605-0.	1
	XB-ART-47779	24226769	Boskovski, M.T., Yuan, S., Pedersen, N.B., Goth, C.K., Makova, S., Clausen, H., et al. (2013). The heterotaxy gene GALNT11 glycosylates Notch to orchestrate cilia type and laterality. Nature 504(7480), 456-459. doi: 10.1038/nature12723.	1
	XB-ART-4893	12900569	Herman, G.E., and El-Hodiri, H.M. (2002). The role of ZIC3 in vertebrate development. Cytogenet Genome Res 99(1-4), 229-235. doi: 10.1159/000071598.	1
	XB-ART-49899	24024827	Kaltenbrun, E., Greco, T.M., Slagle, C.E., Kennedy, L.M., Li, T., Cristea, I.M., et al. (2013). A Gro/TLE-NuRD corepressor complex facilitates Tbx20-dependent transcriptional repression. J Proteome Res 12(12), 5395-5409. doi: 10.1021/pr400818c.	1
	XB-ART-51433	26493400	Endicott, S.J., Basu, B., Khokha, M., and Brueckner, M. (2015). The NIMA-like kinase Nek2 is a key switch balancing cilia biogenesis and resorption in the development of left-right asymmetry. Development 142(23), 4068-4079. doi: 10.1242/dev.126953.	1
	XB-ART-51522	26538025	Silva, E., Betleja, E., John, E., Spear, P., Moresco, J.J., Zhang, S., et al. (2016). Ccdc11 is a novel centriolar satellite protein essential for ciliogenesis and establishment of left-right asymmetry. Mol Biol Cell 27(1), 48-63. doi: 10.1091/mbc.E15-07-0474.	1
	XB-ART-52470	27593162	Del Viso, F., Huang, F., Myers, J., Chalfant, M., Zhang, Y., Reza, N., et al. (2016). Congenital Heart Disease Genetics Uncovers Context-Dependent Organization and Function of Nucleoporins at Cilia. Dev Cell 38(5), 478-492. doi: 10.1016/j.devcel.2016.08.002.	1
	XB-ART-52702	27821535	Cowan, J.R., Tariq, M., Shaw, C., Rao, M., Belmont, J.W., Lalani, S.R., et al. (2016). Copy number variation as a genetic basis for heterotaxy and heterotaxy-spectrum congenital heart defects. Philos Trans R Soc Lond B Biol Sci 371(1710). doi: 10.1098/rstb.2015.0406.	1
	XB-ART-54232	29082114	Garfinkel, A.M., and Khokha, M.K. (2017). An interspecies heart-to-heart: Using Xenopus to uncover the genetic basis of congenital heart disease. Curr Pathobiol Rep 5(2), 187-196. doi: 10.1007/s40139-017-0142-x.	1
	XB-ART-8982	11376438	Kathiriya, I.S., and Srivastava, D. (2000). Left-right asymmetry and cardiac looping: implications for cardiac development and congenital heart disease. Am J Med Genet 97(4), 271-279.	1
congenital hereditary endothelial dystrophy of cornea	XB-ART-48098	23813972	Vilas, G.L., Loganathan, S.K., Liu, J., Riau, A.K., Young, J.D., Mehta, J.S., et al. (2013). Transmembrane water-flux through SLC4A11: a route defective in genetic corneal diseases. Hum Mol Genet 22(22), 4579-4590. doi: 10.1093/hmg/ddt307.	2
congenital muscular dystrophy	XB-ART-861	16406325	Lunardi, A., Cremisi, F., and Dente, L. (2006). Dystroglycan is required for proper retinal layering. Dev Biol 290(2), 411-420. doi: 10.1016/j.ydbio.2005.11.044.	1
congenital myasthenic syndrome	XB-ART-16462	9151734	Gomez, C.M., Maselli, R., Gundeck, J.E., Chao, M., Day, J.W., Tamamizu, S., et al. (1997). Slow-channel transgenic mice: a model of postsynaptic organellar degeneration at the neuromuscular junction. J Neurosci 17(11), 4170-4179.	2
	XB-ART-18846	8538674	Gomez, C.M., Bhattacharyya, B.B., Charnet, P., Day, J.W., Labarca, C., Wollmann, R.L., et al. (1996). A transgenic mouse model of the slow-channel syndrome. Muscle Nerve 19(1), 79-87. doi: 10.1002/(SICI)1097-4598(199601)19:1&lt;79::AID-MUS11&gt;3.0.CO;2-Z.	2
	XB-ART-42347	18836288	Baez-Pagan, C.A., Martinez-Ortiz, Y., Otero-Cruz, J.D., Salgado-Villanueva, I.K., Velazquez, G., Ortiz-Acevedo, A., et al. (2008). Potential role of caveolin-1-positive domains in the regulation of the acetylcholine receptor's activatable pool: implications in the pathogenesis of a novel congenital myasthenic syndrome. Channels (Austin) 2(3), 180-190.	2
	XB-ART-45785	22674269	Walogorsky, M., Mongeon, R., Wen, H., Mandel, G., and Brehm, P. (2012). Acetylcholine receptor gating in a zebrafish model for slow-channel syndrome. J Neurosci 32(23), 7941-7948. doi: 10.1523/jneurosci.0158-12.2012.	2
congenital secretory chloride diarrhea 1	XB-ART-460	16606687	Shcheynikov, N., Wang, Y., Park, M., Ko, S.B., Dorwart, M., Naruse, S., et al. (2006). Coupling modes and stoichiometry of Cl-/HCO3- exchange by slc26a3 and slc26a6. J Gen Physiol 127(5), 511-524. doi: 10.1085/jgp.200509392.	1
	XB-ART-46372	22544634	Chen, A.P., Chang, M.H., and Romero, M.F. (2012). Functional analysis of nonsynonymous single nucleotide polymorphisms in human SLC26A9. Hum Mutat 33(8), 1275-1284. doi: 10.1002/humu.22107.	1
	XB-ART-5554	12651923	Chernova, M.N., Jiang, L., Shmukler, B.E., Schweinfest, C.W., Blanco, P., Freedman, S.D., et al. (2003). Acute regulation of the SLC26A3 congenital chloride diarrhoea anion exchanger (DRA) expressed in Xenopus oocytes. J Physiol 549(Pt 1), 3-19. doi: 10.1113/jphysiol.2003.039818.	1
congestive heart failure	XB-ART-42068	20576935	Casey, L.M., Pistner, A.R., Belmonte, S.L., Migdalovich, D., Stolpnik, O., Nwakanma, F.E., et al. (2010). Small molecule disruption of G beta gamma signaling inhibits the progression of heart failure. Circ Res 107(4), 532-539. doi: 10.1161/circresaha.110.217075.	1
connective tissue disease	XB-ART-34356	17027959	Skoglund, P., and Keller, R. (2007). Xenopus fibrillin regulates directed convergence and extension. Dev Biol 301(2), 404-416. doi: 10.1016/j.ydbio.2006.09.005.	1
corneal dystrophy	XB-ART-46403	23246513	Wang, F., Hu, W., Xian, J., Ohnuma, S., and Brenton, J.D. (2013). The Xenopus Tgfbi is required for embryogenesis through regulation of canonical Wnt signalling. Dev Biol 379(1), 16-27. doi: 10.1016/j.ydbio.2012.11.010.	2
	XB-ART-48098	23813972	Vilas, G.L., Loganathan, S.K., Liu, J., Riau, A.K., Young, J.D., Mehta, J.S., et al. (2013). Transmembrane water-flux through SLC4A11: a route defective in genetic corneal diseases. Hum Mol Genet 22(22), 4579-4590. doi: 10.1093/hmg/ddt307.	2
	XB-ART-52719	27558157	Loganathan, S.K., Schneider, H.P., Morgan, P.E., Deitmer, J.W., and Casey, J.R. (2016). Functional assessment of SLC4A11, an integral membrane protein mutated in corneal dystrophies. Am J Physiol Cell Physiol 311(5), C735-c748. doi: 10.1152/ajpcell.00078.2016.	2
coronary artery disease	XB-ART-54128	29017031	Kirsch, N., Chang, L.S., Koch, S., Glinka, A., Dolde, C., Colozza, G., et al. (2017). Angiopoietin-like 4 Is a Wnt Signaling Antagonist that Promotes LRP6 Turnover. Dev Cell 43(1), 71-82.e76. doi: 10.1016/j.devcel.2017.09.011.	1
creatine transporter deficiency	XB-ART-48234	22644605	Valayannopoulos, V., Bakouh, N., Mazzuca, M., Nonnenmacher, L., Hubert, L., Makaci, F.L., et al. (2013). Functional and electrophysiological characterization of four non-truncating mutations responsible for creatine transporter (SLC6A8) deficiency syndrome. J Inherit Metab Dis 36(1), 103-112. doi: 10.1007/s10545-012-9495-9.	1
Crohn's disease	XB-ART-54087	28971850	Amir Shaghaghi, M., Zhouyao, H., Tu, H., El-Gabalawy, H., Crow, G.H., Levine, M., et al. (2017). The SLC2A14 gene, encoding the novel glucose/dehydroascorbate transporter GLUT14, is associated with inflammatory bowel disease. Am J Clin Nutr 106(6), 1508-1513. doi: 10.3945/ajcn.116.147603.	1
cystic fibrosis	XB-ART-11601	10646604	Schroeder, B.C., Waldegger, S., Fehr, S., Bleich, M., Warth, R., Greger, R., et al. (2000). A constitutively open potassium channel formed by KCNQ1 and KCNE3. Nature 403(6766), 196-199. doi: 10.1038/35003200.	1
	XB-ART-19758	7762608	McDonald, F.J., Price, M.P., Snyder, P.M., and Welsh, M.J. (1995). Cloning and expression of the beta- and gamma-subunits of the human epithelial sodium channel. Am J Physiol 268(5 Pt 1), C1157-1163. doi: 10.1152/ajpcell.1995.268.5.C1157.	1
	XB-ART-34862	17090546	Harris, M., Firsov, D., Vuagniaux, G., Stutts, M.J., and Rossier, B.C. (2007). A novel neutrophil elastase inhibitor prevents elastase activation and surface cleavage of the epithelial sodium channel expressed in Xenopus laevis oocytes. J Biol Chem 282(1), 58-64. doi: 10.1074/jbc.M605125200.	1
	XB-ART-35333	17120768	Shcheynikov, N., Ko, S.B., Zeng, W., Choi, J.Y., Dorwart, M.R., Thomas, P.J., et al. (2006). Regulatory interaction between CFTR and the SLC26 transporters. Novartis Found Symp 273, 177-186; discussion 186-192, 261-174.	1
	XB-ART-3777	15047694	Yan, W., Samaha, F.F., Ramkumar, M., Kleyman, T.R., and Rubenstein, R.C. (2004). Cystic fibrosis transmembrane conductance regulator differentially regulates human and mouse epithelial sodium channels in Xenopus oocytes. J Biol Chem 279(22), 23183-23192. doi: 10.1074/jbc.M402373200.	1
	XB-ART-40097	19643730	Chang, M.H., Plata, C., Sindic, A., Ranatunga, W.K., Chen, A.P., Zandi-Nejad, K., et al. (2009). Slc26a9 is inhibited by the R-region of the cystic fibrosis transmembrane conductance regulator via the STAS domain. J Biol Chem 284(41), 28306-28318. doi: 10.1074/jbc.M109.001669.	1
	XB-ART-41621	20410470	Berger, J., Hardt, M., Clauss, W.G., and Fronius, M. (2010). Basolateral Cl- uptake mechanisms in Xenopus laevis lung epithelium. Am J Physiol Regul Integr Comp Physiol 299(1), R92-100. doi: 10.1152/ajpregu.00749.2009.	1
	XB-ART-44607	21907281	Martins, J.R., Kongsuphol, P., Sammels, E., Dahimene, S., Aldehni, F., Clarke, L.A., et al. (2011). F508del-CFTR increases intracellular Ca(2+) signaling that causes enhanced calcium-dependent Cl(-) conductance in cystic fibrosis. Biochim Biophys Acta 1812(11), 1385-1392. doi: 10.1016/j.bbadis.2011.08.008.	1
	XB-ART-45265	22526416	Berg, J., Yang, H., and Jan, L.Y. (2012). Ca2+-activated Cl- channels at a glance. J Cell Sci 125(Pt 6), 1367-1371. doi: 10.1242/jcs.093260.	1
	XB-ART-45330	22613978	Leier, G., Bangel-Ruland, N., Sobczak, K., Knieper, Y., and Weber, W.M. (2012). Sildenafil acts as potentiator and corrector of CFTR but might be not suitable for the treatment of CF lung disease. Cell Physiol Biochem 29(5-6), 775-790. doi: 10.1159/000265129.	1
	XB-ART-45358	22668601	Krumm, P., Giraldez, T., Alvarez de la Rosa, D., Clauss, W.G., Fronius, M., and Althaus, M. (2012). Thiol-reactive compounds from garlic inhibit the epithelial sodium channel (ENaC). Bioorg Med Chem 20(13), 3979-3984. doi: 10.1016/j.bmc.2012.05.021.	1
	XB-ART-460	16606687	Shcheynikov, N., Wang, Y., Park, M., Ko, S.B., Dorwart, M., Naruse, S., et al. (2006). Coupling modes and stoichiometry of Cl-/HCO3- exchange by slc26a3 and slc26a6. J Gen Physiol 127(5), 511-524. doi: 10.1085/jgp.200509392.	1
	XB-ART-46372	22544634	Chen, A.P., Chang, M.H., and Romero, M.F. (2012). Functional analysis of nonsynonymous single nucleotide polymorphisms in human SLC26A9. Hum Mutat 33(8), 1275-1284. doi: 10.1002/humu.22107.	1
	XB-ART-47465	24108353	Montiel-Gonzalez, M.F., Vallecillo-Viejo, I., Yudowski, G.A., and Rosenthal, J.J. (2013). Correction of mutations within the cystic fibrosis transmembrane conductance regulator by site-directed RNA editing. Proc Natl Acad Sci U S A 110(45), 18285-18290. doi: 10.1073/pnas.1306243110.	1
	XB-ART-47655	24272871	Bakouh, N., Bienvenu, T., Thomas, A., Ehrenfeld, J., Liote, H., Roussel, D., et al. (2013). Characterization of SLC26A9 in patients with CF-like lung disease. Hum Mutat 34(10), 1404-1414. doi: 10.1002/humu.22382.	1
	XB-ART-48908	24747639	Wallmeier, J., Al-Mutairi, D.A., Chen, C.T., Loges, N.T., Pennekamp, P., Menchen, T., et al. (2014). Mutations in CCNO result in congenital mucociliary clearance disorder with reduced generation of multiple motile cilia. Nat Genet 46(6), 646-651. doi: 10.1038/ng.2961.	1
	XB-ART-49402	25148434	Liu, X., and Dawson, D.C. (2014). Cystic fibrosis transmembrane conductance regulator (CFTR) potentiators protect G551D but not DeltaF508 CFTR from thermal instability. Biochemistry 53(35), 5613-5618. doi: 10.1021/bi501007v.	1
	XB-ART-49453	25260629	Tan, C.D., Hobbs, C., Sameni, M., Sloane, B.F., Stutts, M.J., and Tarran, R. (2014). Cathepsin B contributes to Na+ hyperabsorption in cystic fibrosis airway epithelial cultures. J Physiol 592(23), 5251-5268. doi: 10.1113/jphysiol.2013.267286.	1
	XB-ART-50812	25267914	Csanady, L., and Torocsik, B. (2014). Structure-activity analysis of a CFTR channel potentiator: Distinct molecular parts underlie dual gating effects. J Gen Physiol 144(4), 321-336. doi: 10.1085/jgp.201411246.	1
	XB-ART-50840	25024266	Cui, G., Rahman, K.S., Infield, D.T., Kuang, C., Prince, C.Z., and McCarty, N.A. (2014). Three charged amino acids in extracellular loop 1 are involved in maintaining the outer pore architecture of CFTR. J Gen Physiol 144(2), 159-179. doi: 10.1085/jgp.201311122.	1
	XB-ART-50852	26092849	Cibois, M., Luxardi, G., Chevalier, B., Thome, V., Mercey, O., Zaragosi, L.E., et al. (2015). BMP signalling controls the construction of vertebrate mucociliary epithelia. Development 142(13), 2352-2363. doi: 10.1242/dev.118679.	1
	XB-ART-52329	27288484	Cui, G., Khazanov, N., Stauffer, B.B., Infield, D.T., Imhoff, B.R., Senderowitz, H., et al. (2016). Potentiators exert distinct effects on human, murine, and Xenopus CFTR. Am J Physiol Lung Cell Mol Physiol 311(2), L192-207. doi: 10.1152/ajplung.00056.2016.	1
	XB-ART-52429	27653983	Telles, C.J., Decker, S.E., Motley, W.W., Peters, A.W., Mehr, A.P., Frizzell, R.A., et al. (2016). Functional and molecular identification of a TASK-1 potassium channel regulating chloride secretion through CFTR channels in the shark rectal gland: implications for cystic fibrosis. Am J Physiol Cell Physiol 311(6), C884-c894. doi: 10.1152/ajpcell.00030.2016.	1
	XB-ART-53756	28592822	Stauffer, B.B., Cui, G., Cottrill, K.A., Infield, D.T., and McCarty, N.A. (2017). Bacterial Sphingomyelinase is a State-Dependent Inhibitor of the Cystic Fibrosis Transmembrane conductance Regulator (CFTR). Sci Rep 7(1), 2931. doi: 10.1038/s41598-017-03103-2.	1
	XB-ART-54055	28944753	Sorum, B., Torocsik, B., and Csanady, L. (2017). Asymmetry of movements in CFTR's two ATP sites during pore opening serves their distinct functions. Elife 6. doi: 10.7554/eLife.29013.	1
	XB-ART-5554	12651923	Chernova, M.N., Jiang, L., Shmukler, B.E., Schweinfest, C.W., Blanco, P., Freedman, S.D., et al. (2003). Acute regulation of the SLC26A3 congenital chloride diarrhoea anion exchanger (DRA) expressed in Xenopus oocytes. J Physiol 549(Pt 1), 3-19. doi: 10.1113/jphysiol.2003.039818.	1
cystinuria	XB-ART-2935	15458438	Pineda, M., Font, M., Bassi, M.T., Manzoni, M., Borsani, G., Marigo, V., et al. (2004). The amino acid transporter asc-1 is not involved in cystinuria. Kidney Int 66(4), 1453-1464. doi: 10.1111/j.1523-1755.2004.00908.x.	1
demyelinating disease	XB-ART-32429	61558	Tabira, T., Webster, H.D., and Wray, S.H. (1976). Multiple sclerosis cerebrospinal fluid produces myelin lesions in tadpole optic nerves. N Engl J Med 295(12), 644-649. doi: 10.1056/NEJM197609162951204.	1
dengue hemorrhagic fever	XB-ART-42082	20869441	Hu, Z., Du, Y., Nomura, Y., and Dong, K. (2011). A sodium channel mutation identified in Aedes aegypti selectively reduces cockroach sodium channel sensitivity to type I, but not type II pyrethroids. Insect Biochem Mol Biol 41(1), 9-13. doi: 10.1016/j.ibmb.2010.09.005.	1
Dent disease	XB-ART-1895	15895257	Ludwig, M., Doroszewicz, J., Seyberth, H.W., Bokenkamp, A., Balluch, B., Nuutinen, M., et al. (2005). Functional evaluation of Dent's disease-causing mutations: implications for ClC-5 channel trafficking and internalization. Hum Genet 117(2-3), 228-237. doi: 10.1007/s00439-005-1303-2.	1
	XB-ART-42023	20513761	Picollo, A., Malvezzi, M., and Accardi, A. (2010). Proton block of the CLC-5 Cl-/H+ exchanger. J Gen Physiol 135(6), 653-659. doi: 10.1085/jgp.201010428.	1
	XB-ART-42492	21173145	Wellhauser, L., Luna-Chavez, C., D'Antonio, C., Tainer, J., and Bear, C.E. (2011). ATP induces conformational changes in the carboxyl-terminal region of ClC-5. J Biol Chem 286(8), 6733-6741. doi: 10.1074/jbc.M110.175877.	1
	XB-ART-52006	27044412	Satoh, N., Yamada, H., Yamazaki, O., Suzuki, M., Nakamura, M., Suzuki, A., et al. (2016). A pure chloride channel mutant of CLC-5 causes Dent's disease via insufficient V-ATPase activation. Pflugers Arch 468(7), 1183-1196. doi: 10.1007/s00424-016-1808-7.	1
dermatomyositis	XB-ART-14608	9663395	Wade, P.A., Jones, P.L., Vermaak, D., and Wolffe, A.P. (1998). A multiple subunit Mi-2 histone deacetylase from Xenopus laevis cofractionates with an associated Snf2 superfamily ATPase. Curr Biol 8(14), 843-846.	1
diabetes mellitus	XB-ART-2862	15496402	Hertel, J., Struthers, H., Horj, C.B., and Hruz, P.W. (2004). A structural basis for the acute effects of HIV protease inhibitors on GLUT4 intrinsic activity. J Biol Chem 279(53), 55147-55152. doi: 10.1074/jbc.M410826200.	1
	XB-ART-34528	16613899	Proks, P., Arnold, A.L., Bruining, J., Girard, C., Flanagan, S.E., Larkin, B., et al. (2006). A heterozygous activating mutation in the sulphonylurea receptor SUR1 (ABCC8) causes neonatal diabetes. Hum Mol Genet 15(11), 1793-1800. doi: 10.1093/hmg/ddl101.	1
	XB-ART-44499	22121111	Oropeza, D., and Horb, M. (2012). Transient expression of Ngn3 in Xenopus endoderm promotes early and ectopic development of pancreatic beta and delta cells. Genesis 50(3), 271-285. doi: 10.1002/dvg.20828.	1
	XB-ART-4762	12949901	McLachlan, E., White, T.W., Ugonabo, C., Olson, C., Nagy, J.I., and Valdimarsson, G. (2003). Zebrafish Cx35: cloning and characterization of a gap junction gene highly expressed in the retina. J Neurosci Res 73(6), 753-764. doi: 10.1002/jnr.10712.	1
	XB-ART-49060	24848070	Simaite, D., Kofent, J., Gong, M., Ruschendorf, F., Jia, S., Arn, P., et al. (2014). Recessive mutations in PCBD1 cause a new type of early-onset diabetes. Diabetes 63(10), 3557-3564. doi: 10.2337/db13-1784.	1
	XB-ART-49439	25224408	Williams, D.B. (2015). Inhibitory effects of insulin on GABAA currents modulated by the GABAA alpha subunit. J Recept Signal Transduct Res 35(6), 516-522. doi: 10.3109/10799893.2014.960935.	1
	XB-ART-51084	26236566	Salanga, M.C., and Horb, M.E. (2015). Xenopus as a Model for GI/Pancreas Disease. Curr Pathobiol Rep 3(2), 137-145. doi: 10.1007/s40139-015-0076-0.	1
	XB-ART-51783	26806634	Kofent, J., and Spagnoli, F.M. (2016). Xenopus as a model system for studying pancreatic development and diabetes. Semin Cell Dev Biol 51, 106-116. doi: 10.1016/j.semcdb.2016.01.005.	1
diabetic cataract	XB-ART-50313	25866890	Ben Messaoud, N., Yue, J., Valent, D., Katzarova, I., and Lopez, J.M. (2015). Osmostress-induced apoptosis in Xenopus oocytes: role of stress protein kinases, calpains and Smac/DIABLO. PLoS One 10(4), e0124482. doi: 10.1371/journal.pone.0124482.	2
diabetic retinopathy	XB-ART-50313	25866890	Ben Messaoud, N., Yue, J., Valent, D., Katzarova, I., and Lopez, J.M. (2015). Osmostress-induced apoptosis in Xenopus oocytes: role of stress protein kinases, calpains and Smac/DIABLO. PLoS One 10(4), e0124482. doi: 10.1371/journal.pone.0124482.	2
Diamond-Blackfan anemia	XB-ART-52667	27784267	Robson, A., Owens, N.D., Baserga, S.J., Khokha, M.K., and Griffin, J.N. (2016). Expression of ribosomopathy genes during Xenopus tropicalis embryogenesis. BMC Dev Biol 16(1), 38. doi: 10.1186/s12861-016-0138-5.	1
	XB-ART-54953	29364875	Calo, E., Gu, B., Bowen, M.E., Aryan, F., Zalc, A., Liang, J., et al. (2018). Tissue-selective effects of nucleolar stress and rDNA damage in developmental disorders. Nature 554(7690), 112-117. doi: 10.1038/nature25449.	1
DiGeorge syndrome	XB-ART-2262	15736267	Ataliotis, P., Ivins, S., Mohun, T.J., and Scambler, P.J. (2005). XTbx1 is a transcriptional activator involved in head and pharyngeal arch development in Xenopus laevis. Dev Dyn 232(4), 979-991. doi: 10.1002/dvdy.20276.	1
	XB-ART-42286	20692252	Tazumi, S., Yabe, S., and Uchiyama, H. (2010). Paraxial T-box genes, Tbx6 and Tbx1, are required for cranial chondrogenesis and myogenesis. Dev Biol 346(2), 170-180. doi: 10.1016/j.ydbio.2010.07.028.	1
	XB-ART-53080	28255527	Dubey, A., and Saint-Jeannet, J.P. (2017). Modeling human craniofacial disorders in Xenopus. Curr Pathobiol Rep 5(1), 79-92. doi: 10.1007/s40139-017-0128-8.	1
	XB-ART-876	16396913	Voigt, J., and Papalopulu, N. (2006). A dominant-negative form of the E3 ubiquitin ligase Cullin-1 disrupts the correct allocation of cell fate in the neural crest lineage. Development 133(3), 559-568. doi: 10.1242/dev.02201.	1
distal arthrogryposis	XB-ART-34356	17027959	Skoglund, P., and Keller, R. (2007). Xenopus fibrillin regulates directed convergence and extension. Dev Biol 301(2), 404-416. doi: 10.1016/j.ydbio.2006.09.005.	1
	XB-ART-51375	25670203	Borbiro, I., Badheka, D., and Rohacs, T. (2015). Activation of TRPV1 channels inhibits mechanosensitive Piezo channel activity by depleting membrane phosphoinositides. Sci Signal 8(363), ra15. doi: 10.1126/scisignal.2005667.	1
Down syndrome	XB-ART-40926	20067608	Lee, R.H., Mills, E.A., Schwartz, N., Bell, M.R., Deeg, K.E., Ruthazer, E.S., et al. (2010). Neurodevelopmental effects of chronic exposure to elevated levels of pro-inflammatory cytokines in a developing visual system. Neural Dev 5, 2. doi: 10.1186/1749-8104-5-2.	1
	XB-ART-42276	20926679	Alves-Sampaio, A., Troca-Marin, J.A., and Montesinos, M.L. (2010). NMDA-mediated regulation of DSCAM dendritic local translation is lost in a mouse model of Down's syndrome. J Neurosci 30(40), 13537-13548. doi: 10.1523/JNEUROSCI.3457-10.2010.	1
	XB-ART-49272	25088188	Morales Diaz, H.D. (2014). Down syndrome cell adhesion molecule is important for early development in Xenopus tropicalis. Genesis 52(10), 849-857. doi: 10.1002/dvg.22804.	1
Dravet syndrome	XB-ART-40416	19710327	Patino, G.A., Claes, L.R., Lopez-Santiago, L.F., Slat, E.A., Dondeti, R.S., Chen, C., et al. (2009). A functional null mutation of SCN1B in a patient with Dravet syndrome. J Neurosci 29(34), 10764-10778. doi: 10.1523/jneurosci.2475-09.2009.	1
	XB-ART-49793	24782544	Lacroix, J.J., Hyde, H.C., Campos, F.V., and Bezanilla, F. (2014). Moving gating charges through the gating pore in a Kv channel voltage sensor. Proc Natl Acad Sci U S A 111(19), E1950-1959. doi: 10.1073/pnas.1406161111.	1
drug-induced mental disorder	XB-ART-4580	14536082	Stancheva, I., Collins, A.L., Van den Veyver, I.B., Zoghbi, H., and Meehan, R.R. (2003). A mutant form of MeCP2 protein associated with human Rett syndrome cannot be displaced from methylated DNA by notch in Xenopus embryos. Mol Cell 12(2), 425-435.	1
Duchenne muscular dystrophy	XB-ART-36638	17021800	Hamill, O.P. (2006). Twenty odd years of stretch-sensitive channels. Pflugers Arch 453(3), 333-351. doi: 10.1007/s00424-006-0131-0.	1
dyskeratosis congenita	XB-ART-52667	27784267	Robson, A., Owens, N.D., Baserga, S.J., Khokha, M.K., and Griffin, J.N. (2016). Expression of ribosomopathy genes during Xenopus tropicalis embryogenesis. BMC Dev Biol 16(1), 38. doi: 10.1186/s12861-016-0138-5.	1
dystonia	XB-ART-41863	20620873	Yang, J., Krishnamoorthy, G., Saxena, A., Zhang, G., Shi, J., Yang, H., et al. (2010). An epilepsy/dyskinesia-associated mutation enhances BK channel activation by potentiating Ca2+ sensing. Neuron 66(6), 871-883. doi: 10.1016/j.neuron.2010.05.009.	1
dystonia 12	XB-ART-42094	20720542	Poulsen, H., Khandelia, H., Morth, J.P., Bublitz, M., Mouritsen, O.G., Egebjerg, J., et al. (2010). Neurological disease mutations compromise a C-terminal ion pathway in the Na(+)/K(+)-ATPase. Nature 467(7311), 99-102. doi: 10.1038/nature09309.	1
EAST syndrome	XB-ART-39645	19420365	Bockenhauer, D., Feather, S., Stanescu, H.C., Bandulik, S., Zdebik, A.A., Reichold, M., et al. (2009). Epilepsy, ataxia, sensorineural deafness, tubulopathy, and KCNJ10 mutations. N Engl J Med 360(19), 1960-1970. doi: 10.1056/NEJMoa0810276.	0
	XB-ART-42374	21088294	Williams, D.M., Lopes, C.M., Rosenhouse-Dantsker, A., Connelly, H.L., Matavel, A., J, O.U., et al. (2010). Molecular basis of decreased Kir4.1 function in SeSAME/EAST syndrome. J Am Soc Nephrol 21(12), 2117-2129. doi: 10.1681/asn.2009121227.	0
	XB-ART-48182	23471908	Mahmood, F., Mozere, M., Zdebik, A.A., Stanescu, H.C., Tobin, J., Beales, P.L., et al. (2013). Generation and validation of a zebrafish model of EAST (epilepsy, ataxia, sensorineural deafness and tubulopathy) syndrome. Dis Model Mech 6(3), 652-660. doi: 10.1242/dmm.009480.	0
Eastern equine encephalitis	XB-ART-28251	3031203	Morier, L., Cantelar, N., and Soler, M. (1987). Infection of a poikilothermic cell line (XL-2) with eastern equine encephalitis and western equine encephalitis viruses. J Med Virol 21(3), 277-281.	2
Ehlers-Danlos syndrome	XB-ART-52061	27101845	Gouignard, N., Maccarana, M., Strate, I., von Stedingk, K., Malmstrom, A., and Pera, E.M. (2016). Musculocontractural Ehlers-Danlos syndrome and neurocristopathies: dermatan sulfate is required for Xenopus neural crest cells to migrate and adhere to fibronectin. Dis Model Mech 9(6), 607-620. doi: 10.1242/dmm.024661.	1
	XB-ART-53080	28255527	Dubey, A., and Saint-Jeannet, J.P. (2017). Modeling human craniofacial disorders in Xenopus. Curr Pathobiol Rep 5(1), 79-92. doi: 10.1007/s40139-017-0128-8.	1
Emery-Dreifuss muscular dystrophy	XB-ART-47764	24252515	Reil, M., and Dabauvalle, M.C. (2013). Essential roles of LEM-domain protein MAN1 during organogenesis in Xenopus laevis and overlapping functions of emerin. Eur J Cell Biol 92(8-9), 280-294. doi: 10.1016/j.ejcb.2013.10.008.	1
	XB-ART-6016	12490158	Dreger, C.K., Konig, A.R., Spring, H., Lichter, P., and Herrmann, H. (2002). Investigation of nuclear architecture with a domain-presenting expression system. J Struct Biol 140(1-3), 100-115.	1
endocrine system disease	XB-ART-37686	18288313	Davey, J.C., Nomikos, A.P., Wungjiranirun, M., Sherman, J.R., Ingram, L., Batki, C., et al. (2008). Arsenic as an endocrine disruptor: arsenic disrupts retinoic acid receptor-and thyroid hormone receptor-mediated gene regulation and thyroid hormone-mediated amphibian tail metamorphosis. Environ Health Perspect 116(2), 165-172. doi: 10.1289/ehp.10131.	1
	XB-ART-4344	14643292	Levy, G., Lutz, I., Kruger, A., and Kloas, W. (2004). Bisphenol A induces feminization in Xenopus laevis tadpoles. Environ Res 94(1), 102-111.	1
	XB-ART-50210	25744725	Buchholz, D.R. (2015). More similar than you think: Frog metamorphosis as a model of human perinatal endocrinology. Dev Biol 408(2), 188-195. doi: 10.1016/j.ydbio.2015.02.018.	1
epilepsy	XB-ART-1055	16305740	Persson, A.S., Klement, G., Almgren, M., Sahlholm, K., Nilsson, J., Petersson, S., et al. (2005). A truncated Kv1.1 protein in the brain of the megencephaly mouse: expression and interaction. BMC Neurosci 6, 65. doi: 10.1186/1471-2202-6-65.	1
	XB-ART-2245	15742216	Liang, Y., Salas, R., Marubio, L., Bercovich, D., De Biasi, M., Beaudet, A.L., et al. (2005). Functional polymorphisms in the human beta4 subunit of nicotinic acetylcholine receptors. Neurogenetics 6(1), 37-44. doi: 10.1007/s10048-004-0199-7.	1
	XB-ART-22829	7679115	Karp, S.J., Masu, M., Eki, T., Ozawa, K., and Nakanishi, S. (1993). Molecular cloning and chromosomal localization of the key subunit of the human N-methyl-D-aspartate receptor. J Biol Chem 268(5), 3728-3733.	1
	XB-ART-40416	19710327	Patino, G.A., Claes, L.R., Lopez-Santiago, L.F., Slat, E.A., Dondeti, R.S., Chen, C., et al. (2009). A functional null mutation of SCN1B in a patient with Dravet syndrome. J Neurosci 29(34), 10764-10778. doi: 10.1523/jneurosci.2475-09.2009.	1
	XB-ART-41863	20620873	Yang, J., Krishnamoorthy, G., Saxena, A., Zhang, G., Shi, J., Yang, H., et al. (2010). An epilepsy/dyskinesia-associated mutation enhances BK channel activation by potentiating Ca2+ sensing. Neuron 66(6), 871-883. doi: 10.1016/j.neuron.2010.05.009.	1
	XB-ART-42889	21378970	Bell, M.R., Belarde, J.A., Johnson, H.F., and Aizenman, C.D. (2011). A neuroprotective role for polyamines in a Xenopus tadpole model of epilepsy. Nat Neurosci 14(4), 505-512. doi: 10.1038/nn.2777.	1
	XB-ART-4867	12913092	Xiong, W., Li, R.A., Tian, Y., and Tomaselli, G.F. (2003). Molecular motions of the outer ring of charge of the sodium channel: do they couple to slow inactivation? J Gen Physiol 122(3), 323-332. doi: 10.1085/jgp.200308881.	1
	XB-ART-49584	25420144	Simons, C., Rash, L.D., Crawford, J., Ma, L., Cristofori-Armstrong, B., Miller, D., et al. (2015). Mutations in the voltage-gated potassium channel gene KCNH1 cause Temple-Baraitser syndrome and epilepsy. Nat Genet 47(1), 73-77. doi: 10.1038/ng.3153.	1
	XB-ART-50493	24635129	Gilchrist, J., Dutton, S., Diaz-Bustamante, M., McPherson, A., Olivares, N., Kalia, J., et al. (2014). Nav1.1 modulation by a novel triazole compound attenuates epileptic seizures in rodents. ACS Chem Biol 9(5), 1204-1212. doi: 10.1021/cb500108p.	1
	XB-ART-50616	24794859	Ambrosini, E., Sicca, F., Brignone, M.S., D'Adamo, M.C., Napolitano, C., Servettini, I., et al. (2014). Genetically induced dysfunctions of Kir2.1 channels: implications for short QT3 syndrome and autism-epilepsy phenotype. Hum Mol Genet 23(18), 4875-4886. doi: 10.1093/hmg/ddu201.	1
	XB-ART-51893	26914447	Liin, S.I., Karlsson, U., Bentzen, B.H., Schmitt, N., and Elinder, F. (2016). Polyunsaturated fatty acids are potent openers of human M-channels expressed in Xenopus laevis oocytes. Acta Physiol (Oxf) 218(1), 28-37. doi: 10.1111/apha.12663.	1
	XB-ART-52421	27677466	Sicca, F., Ambrosini, E., Marchese, M., Sforna, L., Servettini, I., Valvo, G., et al. (2016). Gain-of-function defects of astrocytic Kir4.1 channels in children with autism spectrum disorders and epilepsy. Sci Rep 6, 34325. doi: 10.1038/srep34325.	1
	XB-ART-54058	28943291	Karim, N., Khan, I., Ahmad, N., Umar, M.N., and Gavande, N. (2017). Antidepressant, anticonvulsant and antinociceptive effects of 3'-methoxy-6-methylflavone and 3'-hydroxy-6-methylflavone may involve GABAergic mechanisms. Pharmacol Rep 69(5), 1014-1020. doi: 10.1016/j.pharep.2017.03.001.	1
	XB-ART-54172	29053855	Niturad, C.E., Lev, D., Kalscheuer, V.M., Charzewska, A., Schubert, J., Lerman-Sagie, T., et al. (2017). Rare GABRA3 variants are associated with epileptic seizures, encephalopathy and dysmorphic features. Brain 140(11), 2879-2894. doi: 10.1093/brain/awx236.	1
	XB-ART-54175	29050392	Masnada, S., Hedrich, U.B.S., Gardella, E., Schubert, J., Kaiwar, C., Klee, E.W., et al. (2017). Clinical spectrum and genotype-phenotype associations of KCNA2-related encephalopathies. Brain 140(9), 2337-2354. doi: 10.1093/brain/awx184.	1
	XB-ART-54193	29069600	Gururaj, S., Palmer, E.E., Sheehan, G.D., Kandula, T., Macintosh, R., Ying, K., et al. (2017). A De Novo Mutation in the Sodium-Activated Potassium Channel KCNT2 Alters Ion Selectivity and Causes Epileptic Encephalopathy. Cell Rep 21(4), 926-933. doi: 10.1016/j.celrep.2017.09.088.	1
	XB-ART-54196	29064616	Li, M., Maljevic, S., Phillips, A.M., Petrovski, S., Hildebrand, M.S., Burgess, R., et al. (2018). Gain-of-function HCN2 variants in genetic epilepsy. Hum Mutat 39(2), 202-209. doi: 10.1002/humu.23357.	1
	XB-ART-54329	29196579	McTague, A., Nair, U., Malhotra, S., Meyer, E., Trump, N., Gazina, E.V., et al. (2018). Clinical and molecular characterization of KCNT1-related severe early-onset epilepsy. Neurology 90(1), e55-e66. doi: 10.1212/WNL.0000000000004762.	1
	XB-ART-54694	29588962	Becker, F., Reid, C.A., Hallmann, K., Tae, H.S., Phillips, A.M., Teodorescu, G., et al. (2017). Functional variants in HCN4 and CACNA1H may contribute to genetic generalized epilepsy. Epilepsia Open 2(3), 334-342. doi: 10.1002/epi4.12068.	1
	XB-ART-54741	29599640	Zhang, J., Mohamad, F.H., Wong, J.H., Mohamad, H., Ismail, A.H., Mohamed Yusoff, A.A., et al. (2018). The Effects of 4-Hydroxybenzoic Acid Identified from Bamboo (Dendrocalamus asper) Shoots on Kv1.4 Channel. Malays J Med Sci 25(1), 101-113. doi: 10.21315/mjms2018.25.1.12.	1
	XB-ART-9009	11360485	Sugaya, A. (2001). [Cellular mechanism of seizure discharge and its normalization by a herbal mixture prescription "saikokeishito-ka-shakuyaku" (SK)]. Yakugaku Zasshi 121(5), 295-317.	1
episodic ataxia	XB-ART-51549	11015449	Felix, R. (2000). Channelopathies: ion channel defects linked to heritable clinical disorders. J Med Genet 37(10), 729-740.	1
episodic ataxia type 1	XB-ART-34974	17136396	Chen, H., von Hehn, C., Kaczmarek, L.K., Ment, L.R., Pober, B.R., and Hisama, F.M. (2007). Functional analysis of a novel potassium channel (KCNA1) mutation in hereditary myokymia. Neurogenetics 8(2), 131-135. doi: 10.1007/s10048-006-0071-z.	1
	XB-ART-42816	21307345	Imbrici, P., D'Adamo, M.C., Grottesi, A., Biscarini, A., and Pessia, M. (2011). Episodic ataxia type 1 mutations affect fast inactivation of K+ channels by a reduction in either subunit surface expression or affinity for inactivation domain. Am J Physiol Cell Physiol 300(6), C1314-1322. doi: 10.1152/ajpcell.00456.2010.	1
	XB-ART-44633	22206926	Ishida, S., Sakamoto, Y., Nishio, T., Baulac, S., Kuwamura, M., Ohno, Y., et al. (2012). Kcna1-mutant rats dominantly display myokymia, neuromyotonia and spontaneous epileptic seizures. Brain Res 1435, 154-166. doi: 10.1016/j.brainres.2011.11.023.	1
	XB-ART-51222	26338330	Petitjean, D., Kalstrup, T., Zhao, J., and Blunck, R. (2015). A Disease Mutation Causing Episodic Ataxia Type I in the S1 Links Directly to the Voltage Sensor and the Selectivity Filter in Kv Channels. J Neurosci 35(35), 12198-12206. doi: 10.1523/jneurosci.1419-15.2015.	1
episodic ataxia type 2	XB-ART-1053	16306128	Jeng, C.J., Chen, Y.T., Chen, Y.W., and Tang, C.Y. (2006). Dominant-negative effects of human P/Q-type Ca2+ channel mutations associated with episodic ataxia type 2. Am J Physiol Cell Physiol 290(4), C1209-1220. doi: 10.1152/ajpcell.00247.2005.	1
episodic ataxia type 6	XB-ART-50504	24214974	Hotzy, J., Schneider, N., Kovermann, P., and Fahlke, C. (2013). Mutating a conserved proline residue within the trimerization domain modifies Na+ binding to excitatory amino acid transporters and associated conformational changes. J Biol Chem 288(51), 36492-36501. doi: 10.1074/jbc.M113.489385.	1
essential tremor	XB-ART-3778	15046870	Vega-Saenz de Miera, E.C. (2004). Modification of Kv2.1 K+ currents by the silent Kv10 subunits. Brain Res Mol Brain Res 123(1-2), 91-103. doi: 10.1016/j.molbrainres.2004.01.004.	1
exudative vitreoretinopathy	XB-ART-373	16683072	Janssens, N., Janicot, M., and Perera, T. (2006). The Wnt-dependent signaling pathways as target in oncology drug discovery. Invest New Drugs 24(4), 263-280. doi: 10.1007/s10637-005-5199-4.	2
	XB-ART-42546	21177847	Zhang, K., Harada, Y., Wei, X., Shukla, D., Rajendran, A., Tawansy, K., et al. (2011). An essential role of the cysteine-rich domain of FZD4 in Norrin/Wnt signaling and familial exudative vitreoretinopathy. J Biol Chem 286(12), 10210-10215. doi: 10.1074/jbc.M110.194399.	2
	XB-ART-6717	12172548	Robitaille, J., MacDonald, M.L., Kaykas, A., Sheldahl, L.C., Zeisler, J., Dube, M.P., et al. (2002). Mutant frizzled-4 disrupts retinal angiogenesis in familial exudative vitreoretinopathy. Nat Genet 32(2), 326-330. doi: 10.1038/ng957.	2
eye disease	XB-ART-22027	8291895	Hauptman, O., Albert, D.M., Plowman, M.C., Hopfer, S.M., and Sunderman, F.W., Jr. (1993). Ocular malformations of Xenopus laevis exposed to nickel during embryogenesis. Ann Clin Lab Sci 23(6), 397-406.	2
facioscapulohumeral muscular dystrophy	XB-ART-41536	20490329	Wuebbles, R.D., Long, S.W., Hanel, M.L., and Jones, P.L. (2010). Testing the effects of FSHD candidate gene expression in vertebrate muscle development. Int J Clin Exp Pathol 3(4), 386-400.	1
familial adenomatous polyposis	XB-ART-42112	20890287	Thorne, C.A., Hanson, A.J., Schneider, J., Tahinci, E., Orton, D., Cselenyi, C.S., et al. (2010). Small-molecule inhibition of Wnt signaling through activation of casein kinase 1alpha. Nat Chem Biol 6(11), 829-836. doi: 10.1038/nchembio.453.	1
	XB-ART-52973	28095622	Naert, T., Van Nieuwenhuysen, T., and Vleminckx, K. (2017). TALENs and CRISPR/Cas9 fuel genetically engineered clinically relevant Xenopus tropicalis tumor models. Genesis 55(1-2). doi: 10.1002/dvg.23005.	1
familial hemiplegic migraine	XB-ART-2968	15448138	Mullner, C., Broos, L.A., van den Maagdenberg, A.M., and Striessnig, J. (2004). Familial hemiplegic migraine type 1 mutations K1336E, W1684R, and V1696I alter Cav2.1 Ca2+ channel gating: evidence for beta-subunit isoform-specific effects. J Biol Chem 279(50), 51844-51850. doi: 10.1074/jbc.M408756200.	1
	XB-ART-34626	15843000	Koenderink, J.B., Zifarelli, G., Qiu, L.Y., Schwarz, W., De Pont, J.J., Bamberg, E., et al. (2005). Na,K-ATPase mutations in familial hemiplegic migraine lead to functional inactivation. Biochim Biophys Acta 1669(1), 61-68. doi: 10.1016/j.bbamem.2005.01.003.	1
	XB-ART-42094	20720542	Poulsen, H., Khandelia, H., Morth, J.P., Bublitz, M., Mouritsen, O.G., Egebjerg, J., et al. (2010). Neurological disease mutations compromise a C-terminal ion pathway in the Na(+)/K(+)-ATPase. Nature 467(7311), 99-102. doi: 10.1038/nature09309.	1
	XB-ART-49198	24836863	Garcia Segarra, N., Gautschi, I., Mittaz-Crettol, L., Kallay Zetchi, C., Al-Qusairi, L., Van Bemmelen, M.X., et al. (2014). Congenital ataxia and hemiplegic migraine with cerebral edema associated with a novel gain of function mutation in the calcium channel CACNA1A. J Neurol Sci 342(1-2), 69-78. doi: 10.1016/j.jns.2014.04.027.	1
familial hypocalciuric hypercalcemia	XB-ART-19547	7602378	Brown, E.M., Pollak, M., Chou, Y.H., Seidman, C.E., Seidman, J.G., and Hebert, S.C. (1995). The cloning of extracellular Ca(2+)-sensing receptors from parathyroid and kidney: molecular mechanisms of extracellular Ca(2+)-sensing. J Nutr 125(7 Suppl), 1965s-1970s.	1
familial juvenile hyperuricemic nephropathy	XB-ART-42381	21081491	Renigunta, A., Renigunta, V., Saritas, T., Decher, N., Mutig, K., and Waldegger, S. (2011). Tamm-Horsfall glycoprotein interacts with renal outer medullary potassium channel ROMK2 and regulates its function. J Biol Chem 286(3), 2224-2235. doi: 10.1074/jbc.M110.149880.	1
Fanconi anemia	xb-art-3257	15262960	Leveille, F., Blom, E., Medhurst, A.L., Bier, P., Laghmani el, H., Johnson, M., et al. (2004). The Fanconi anemia gene product FANCF is a flexible adaptor protein. J Biol Chem 279(38), 39421-39430. doi: 10.1074/jbc.M407034200.	1
	xb-art-36130	17584296	Stone, S., Sobeck, A., van Kogelenberg, M., de Graaf, B., Joenje, H., Christian, J., et al. (2007). Identification, developmental expression and regulation of the Xenopus ortholog of human FANCG/XRCC9. Genes Cells 12(7), 841-851. doi: 10.1111/j.1365-2443.2007.01096.x.	1
	xb-art-40788	20043851	Landais, I., Hiddingh, S., McCarroll, M., Yang, C., Sun, A., Turker, M.S., et al. (2009). Monoketone analogs of curcumin, a new class of Fanconi anemia pathway inhibitors. Mol Cancer 8, 133. doi: 10.1186/1476-4598-8-133.	1
	xb-art-46414	22753026	Sareen, A., Chaudhury, I., Adams, N., and Sobeck, A. (2012). Fanconi anemia proteins FANCD2 and FANCI exhibit different DNA damage responses during S-phase. Nucleic Acids Res 40(17), 8425-8439. doi: 10.1093/nar/gks638.	1
	xb-art-890	16382135	Sobeck, A., Stone, S., Costanzo, V., de Graaf, B., Reuter, T., de Winter, J., et al. (2006). Fanconi anemia proteins are required to prevent accumulation of replication-associated DNA double-strand breaks. Mol Cell Biol 26(2), 425-437. doi: 10.1128/MCB.26.2.425-437.2006.	1
Fanconi anemia complementation group A	XB-ART-50832	26071591	Budzowska, M., Graham, T.G., Sobeck, A., Waga, S., and Walter, J.C. (2015). Regulation of the Rev1-pol zeta complex during bypass of a DNA interstrand cross-link. Embo j 34(14), 1971-1985. doi: 10.15252/embj.201490878.	1
Fanconi anemia complementation group J	XB-ART-49425	25193968	Castillo Bosch, P., Segura-Bayona, S., Koole, W., van Heteren, J.T., Dewar, J.M., Tijsterman, M., et al. (2014). FANCJ promotes DNA synthesis through G-quadruplex structures. Embo j 33(21), 2521-2533. doi: 10.15252/embj.201488663.	1
Fanconi anemia complementation group R	XB-ART-54127	29020621	Zadorozhny, K., Sannino, V., Belan, O., Mlcouskova, J., Spirek, M., Costanzo, V., et al. (2017). Fanconi-Anemia-Associated Mutations Destabilize RAD51 Filaments and Impair Replication Fork Protection. Cell Rep 21(2), 333-340. doi: 10.1016/j.celrep.2017.09.062.	1
fetal alcohol spectrum disorder	XB-ART-2330	15708568	Yelin, R., Schyr, R.B., Kot, H., Zins, S., Frumkin, A., Pillemer, G., et al. (2005). Ethanol exposure affects gene expression in the embryonic organizer and reduces retinoic acid levels. Dev Biol 279(1), 193-204. doi: 10.1016/j.ydbio.2004.12.014.	1
	XB-ART-30056	6648833	Nakatsuji, N. (1983). Craniofacial malformation in Xenopus laevis tadpoles caused by the exposure of early embryos to ethanol. Teratology 28(2), 299-305. doi: 10.1002/tera.1420280220.	1
	XB-ART-35324	17286601	Yelin, R., Kot, H., Yelin, D., and Fainsod, A. (2007). Early molecular effects of ethanol during vertebrate embryogenesis. Differentiation 75(5), 393-403. doi: 10.1111/j.1432-0436.2006.00147.x.	1
	XB-ART-48712	24631632	Czarnobaj, J., Bagnall, K.M., Bamforth, J.S., and Milos, N.C. (2014). The different effects on cranial and trunk neural crest cell behaviour following exposure to a low concentration of alcohol in vitro. Arch Oral Biol 59(5), 500-512. doi: 10.1016/j.archoralbio.2014.02.005.	1
	XB-ART-49432	25223405	Shi, Y., Li, J., Chen, C., Gong, M., Chen, Y., Liu, Y., et al. (2014). 5-Mehtyltetrahydrofolate rescues alcohol-induced neural crest cell migration abnormalities. Mol Brain 7, 67. doi: 10.1186/s13041-014-0067-9.	1
fetal alcohol syndrome	XB-ART-2330	15708568	Yelin, R., Schyr, R.B., Kot, H., Zins, S., Frumkin, A., Pillemer, G., et al. (2005). Ethanol exposure affects gene expression in the embryonic organizer and reduces retinoic acid levels. Dev Biol 279(1), 193-204. doi: 10.1016/j.ydbio.2004.12.014.	1
	XB-ART-30056	6648833	Nakatsuji, N. (1983). Craniofacial malformation in Xenopus laevis tadpoles caused by the exposure of early embryos to ethanol. Teratology 28(2), 299-305. doi: 10.1002/tera.1420280220.	1
	XB-ART-4230	14691149	Peng, Y., Yang, P.H., Guo, Y., Ng, S.S., Liu, J., Fung, P.C., et al. (2004). Catalase and peroxiredoxin 5 protect Xenopus embryos against alcohol-induced ocular anomalies. Invest Ophthalmol Vis Sci 45(1), 23-29.	1
	XB-ART-53080	28255527	Dubey, A., and Saint-Jeannet, J.P. (2017). Modeling human craniofacial disorders in Xenopus. Curr Pathobiol Rep 5(1), 79-92. doi: 10.1007/s40139-017-0128-8.	1
focal epilepsy	XB-ART-47654	24272827	Lemke, J.R., Hendrickx, R., Geider, K., Laube, B., Schwake, M., Harvey, R.J., et al. (2014). GRIN2B mutations in West syndrome and intellectual disability with focal epilepsy. Ann Neurol 75(1), 147-154. doi: 10.1002/ana.24073.	1
	XB-ART-9009	11360485	Sugaya, A. (2001). [Cellular mechanism of seizure discharge and its normalization by a herbal mixture prescription "saikokeishito-ka-shakuyaku" (SK)]. Yakugaku Zasshi 121(5), 295-317.	1
fragile X syndrome	XB-ART-20188	7789994	Wang, Y.H., and Griffith, J. (1995). Expanded CTG triplet blocks from the myotonic dystrophy gene create the strongest known natural nucleosome positioning elements. Genomics 25(2), 570-573.	1
	XB-ART-52341	27503008	Truszkowski, T.L., James, E.J., Hasan, M., Wishard, T.J., Liu, Z., Pratt, K.G., et al. (2016). Fragile X mental retardation protein knockdown in the developing Xenopus tadpole optic tectum results in enhanced feedforward inhibition and behavioral deficits. Neural Dev 11(1), 14. doi: 10.1186/s13064-016-0069-7.	1
frontotemporal dementia	XB-ART-2546	15615643	Lee, V.M., Kenyon, T.K., and Trojanowski, J.Q. (2005). Transgenic animal models of tauopathies. Biochim Biophys Acta 1739(2-3), 251-259. doi: 10.1016/j.bbadis.2004.06.014.	2
Fuchs' endothelial dystrophy	XB-ART-48098	23813972	Vilas, G.L., Loganathan, S.K., Liu, J., Riau, A.K., Young, J.D., Mehta, J.S., et al. (2013). Transmembrane water-flux through SLC4A11: a route defective in genetic corneal diseases. Hum Mol Genet 22(22), 4579-4590. doi: 10.1093/hmg/ddt307.	2
gastritis	XB-ART-15954	9322508	Claeys, D., Saraga, E., Rossier, B.C., and Kraehenbuhl, J.P. (1997). Neonatal injection of native proton pump antigens induces autoimmune gastritis in mice. Gastroenterology 113(4), 1136-1145.	1
gastrointestinal system disease	XB-ART-45358	22668601	Krumm, P., Giraldez, T., Alvarez de la Rosa, D., Clauss, W.G., Fronius, M., and Althaus, M. (2012). Thiol-reactive compounds from garlic inhibit the epithelial sodium channel (ENaC). Bioorg Med Chem 20(13), 3979-3984. doi: 10.1016/j.bmc.2012.05.021.	1
generalized epilepsy with febrile seizures plus	XB-ART-4465	14597328	Macdonald, R.L., Bianchi, M.T., and Feng, H. (2003). Mutations linked to generalized epilepsy in humans reduce GABA(A) receptor current. Exp Neurol 184 Suppl 1, S58-67.	1
	XB-ART-9626	11166117	Kearney, J.A., Plummer, N.W., Smith, M.R., Kapur, J., Cummins, T.R., Waxman, S.G., et al. (2001). A gain-of-function mutation in the sodium channel gene Scn2a results in seizures and behavioral abnormalities. Neuroscience 102(2), 307-317.	1
Gitelman syndrome	XB-ART-7076	12039972	De Jong, J.C., Van Der Vliet, W.A., Van Den Heuvel, L.P., Willems, P.H., Knoers, N.V., and Bindels, R.J. (2002). Functional expression of mutations in the human NaCl cotransporter: evidence for impaired routing mechanisms in Gitelman's syndrome. J Am Soc Nephrol 13(6), 1442-1448.	1
	XB-ART-82	16887815	Pacheco-Alvarez, D., Cristobal, P.S., Meade, P., Moreno, E., Vazquez, N., Munoz, E., et al. (2006). The Na+:Cl- cotransporter is activated and phosphorylated at the amino-terminal domain upon intracellular chloride depletion. J Biol Chem 281(39), 28755-28763. doi: 10.1074/jbc.M603773200.	1
glaucoma	XB-ART-2902	15471865	Dinour, D., Chang, M.H., Satoh, J., Smith, B.L., Angle, N., Knecht, A., et al. (2004). A novel missense mutation in the sodium bicarbonate cotransporter (NBCe1/SLC4A4) causes proximal tubular acidosis and glaucoma through ion transport defects. J Biol Chem 279(50), 52238-52246. doi: 10.1074/jbc.M406591200.	2
glioblastoma multiforme	XB-ART-46980	23619303	De Robertis, A., Valensin, S., Rossi, M., Tunici, P., Verani, M., De Rosa, A., et al. (2013). Identification and characterization of a small-molecule inhibitor of Wnt signaling in glioblastoma cells. Mol Cancer Ther 12(7), 1180-1189. doi: 10.1158/1535-7163.Mct-12-1176-t.	1
glucose metabolism disease	XB-ART-38350	18783407	Pearl, E.J., and Horb, M.E. (2008). Promoting ectopic pancreatic fates: pancreas development and future diabetes therapies. Clin Genet 74(4), 316-324. doi: 10.1111/j.1399-0004.2008.01081.x.	1
goiter	XB-ART-31232	6125553	de Vijlder, J.J., van Ommen, G.J., van Voorthuizen, W.F., Koch, C.A., Arnberg, A.C., Vassart, G., et al. (1981). Nonfunctional thyroglobulin messenger RNA in goats with hereditary congenital goiter. J Mol Appl Genet 1(1), 51-59.	1
gout	XB-ART-47162	23493553	Woodward, O.M., Tukaye, D.N., Cui, J., Greenwell, P., Constantoulakis, L.M., Parker, B.S., et al. (2013). Gout-causing Q141K mutation in ABCG2 leads to instability of the nucleotide-binding domain and can be corrected with small molecules. Proc Natl Acad Sci U S A 110(13), 5223-5228. doi: 10.1073/pnas.1214530110.	1
	XB-ART-48040	23876149	Miyaji, T., Kawasaki, T., Togawa, N., Omote, H., and Moriyama, Y. (2013). Type 1 sodium-dependent phosphate transporter acts as a membrane potential-driven urate exporter. Curr Mol Pharmacol 6(2), 88-94.	1
Graves' disease	XB-ART-46213	23150524	van Veenendaal, N.R., Ulmer, B., Boskovski, M.T., Fang, X., Khokha, M.K., Wendler, C.C., et al. (2013). Embryonic exposure to propylthiouracil disrupts left-right patterning in Xenopus embryos. Faseb j 27(2), 684-691. doi: 10.1096/fj.12-218073.	1
Greig cephalopolysyndactyly syndrome	XB-ART-7468	11898849	Harmon, E.B., Ko, A.H., and Kim, S.K. (2002). Hedgehog signaling in gastrointestinal development and disease. Curr Mol Med 2(1), 67-82.	1
heart conduction disease	XB-ART-19515	7603988	England, S.K., Uebele, V.N., Shear, H., Kodali, J., Bennett, P.B., and Tamkun, M.M. (1995). Characterization of a voltage-gated K+ channel beta subunit expressed in human heart. Proc Natl Acad Sci U S A 92(14), 6309-6313.	1
hemochromatosis	XB-ART-34602	16440176	McGregor, J.A., Shayeghi, M., Vulpe, C.D., Anderson, G.J., Pietrangelo, A., Simpson, R.J., et al. (2005). Impaired iron transport activity of ferroportin 1 in hereditary iron overload. J Membr Biol 206(1), 3-7. doi: 10.1007/s00232-005-0768-1.	1
hepatocellular carcinoma	XB-ART-53701	27672271	Liu, L.J., Xie, S.X., Chen, Y.T., Xue, J.L., Zhang, C.J., and Zhu, F. (2016). Aberrant regulation of Wnt signaling in hepatocellular carcinoma. World J Gastroenterol 22(33), 7486-7499. doi: 10.3748/wjg.v22.i33.7486.	3
hereditary ataxia	XB-ART-34974	17136396	Chen, H., von Hehn, C., Kaczmarek, L.K., Ment, L.R., Pober, B.R., and Hisama, F.M. (2007). Functional analysis of a novel potassium channel (KCNA1) mutation in hereditary myokymia. Neurogenetics 8(2), 131-135. doi: 10.1007/s10048-006-0071-z.	1
hereditary lymphedema	XB-ART-39785	19478043	Kalin, R.E., Banziger-Tobler, N.E., Detmar, M., and Brandli, A.W. (2009). An in vivo chemical library screen in Xenopus tadpoles reveals novel pathways involved in angiogenesis and lymphangiogenesis. Blood 114(5), 1110-1122. doi: 10.1182/blood-2009-03-211771.	1
hereditary motor and sensory neuropathy with agenesis of the corpus callosum	XB-ART-6429	12368912	Howard, H.C., Mount, D.B., Rochefort, D., Byun, N., Dupre, N., Lu, J., et al. (2002). The K-Cl cotransporter KCC3 is mutant in a severe peripheral neuropathy associated with agenesis of the corpus callosum. Nat Genet 32(3), 384-392. doi: 10.1038/ng1002.	1
hereditary multiple exostoses	XB-ART-2100	15797385	Tao, Q., Yokota, C., Puck, H., Kofron, M., Birsoy, B., Yan, D., et al. (2005). Maternal wnt11 activates the canonical wnt signaling pathway required for axis formation in Xenopus embryos. Cell 120(6), 857-871. doi: 10.1016/j.cell.2005.01.013.	1
hereditary retinal dystrophy	XB-ART-38287	18723859	Schafer, T., Putz, M., Lienkamp, S., Ganner, A., Bergbreiter, A., Ramachandran, H., et al. (2008). Genetic and physical interaction between the NPHP5 and NPHP6 gene products. Hum Mol Genet 17(23), 3655-3662. doi: 10.1093/hmg/ddn260.	2
hereditary sensory and autonomic neuropathy type 8	XB-ART-50590	25891934	Nagy, V., Cole, T., Van Campenhout, C., Khoung, T.M., Leung, C., Vermeiren, S., et al. (2015). The evolutionarily conserved transcription factor PRDM12 controls sensory neuron development and pain perception. Cell Cycle 14(12), 1799-1808. doi: 10.1080/15384101.2015.1036209.	1
hereditary sensory neuropathy type 4	XB-ART-15670	9349813	Caterina, M.J., Schumacher, M.A., Tominaga, M., Rosen, T.A., Levine, J.D., and Julius, D. (1997). The capsaicin receptor: a heat-activated ion channel in the pain pathway. Nature 389(6653), 816-824. doi: 10.1038/39807.	1
hereditary spastic paraplegia 6	XB-ART-35069	17166836	Goytain, A., Hines, R.M., El-Husseini, A., and Quamme, G.A. (2007). NIPA1(SPG6), the basis for autosomal dominant form of hereditary spastic paraplegia, encodes a functional Mg2+ transporter. J Biol Chem 282(11), 8060-8068. doi: 10.1074/jbc.M610314200.	1
Hermansky-Pudlak syndrome 6	XB-ART-52468	27595926	Nakayama, T., Nakajima, K., Cox, A., Fisher, M., Howell, M., Fish, M.B., et al. (2017). no privacy, a Xenopus tropicalis mutant, is a model of human Hermansky-Pudlak Syndrome and allows visualization of internal organogenesis during tadpole development. Dev Biol 426(2), 472-486. doi: 10.1016/j.ydbio.2016.08.020.	1
hermaphroditism	XB-ART-165	16818259	Hayes, T.B., Stuart, A.A., Mendoza, M., Collins, A., Noriega, N., Vonk, A., et al. (2006). Characterization of atrazine-induced gonadal malformations in African clawed frogs (Xenopus laevis) and comparisons with effects of an androgen antagonist (cyproterone acetate) and exogenous estrogen (17beta-estradiol): Support for the demasculinization/feminization hypothesis. Environ Health Perspect 114 S…	1
	XB-ART-37556	18395276	Oka, T., Tooi, O., Mitsui, N., Miyahara, M., Ohnishi, Y., Takase, M., et al. (2008). Effect of atrazine on metamorphosis and sexual differentiation in Xenopus laevis. Aquat Toxicol 87(4), 215-226. doi: 10.1016/j.aquatox.2008.02.009.	1
	XB-ART-7285	11960004	Hayes, T.B., Collins, A., Lee, M., Mendoza, M., Noriega, N., Stuart, A.A., et al. (2002). Hermaphroditic, demasculinized frogs after exposure to the herbicide atrazine at low ecologically relevant doses. Proc Natl Acad Sci U S A 99(8), 5476-5480. doi: 10.1073/pnas.082121499.	1
high pressure neurological syndrome	XB-ART-51019	26202884	Bliznyuk, A., Aviner, B., Golan, H., Hollmann, M., and Grossman, Y. (2015). The N-methyl-D-aspartate receptor's neglected subunit - GluN1 matters under normal and hyperbaric conditions. Eur J Neurosci 42(8), 2577-2584. doi: 10.1111/ejn.13022.	1
	XB-ART-52511	27375428	Bliznyuk, A., Gradwohl, G., Hollmann, M., and Grossman, Y. (2016). The Enigma of the Dichotomic Pressure Response of GluN1-4a/b Splice Variants of NMDA Receptor: Experimental and Statistical Analyses. Front Mol Neurosci 9, 40. doi: 10.3389/fnmol.2016.00040.	1
holoprosencephaly 5	XB-ART-3572	15136147	Inoue, T., Hatayama, M., Tohmonda, T., Itohara, S., Aruga, J., and Mikoshiba, K. (2004). Mouse Zic5 deficiency results in neural tube defects and hypoplasia of cephalic neural crest derivatives. Dev Biol 270(1), 146-162. doi: 10.1016/j.ydbio.2004.02.017.	1
holoprosencephaly 9	XB-ART-4496	14581620	Roessler, E., Du, Y.Z., Mullor, J.L., Casas, E., Allen, W.P., Gillessen-Kaesbach, G., et al. (2003). Loss-of-function mutations in the human GLI2 gene are associated with pituitary anomalies and holoprosencephaly-like features. Proc Natl Acad Sci U S A 100(23), 13424-13429. doi: 10.1073/pnas.2235734100.	1
Holt-Oram syndrome	XB-ART-12425	10468588	He, M., Wen, L., Campbell, C.E., Wu, J.Y., and Rao, Y. (1999). Transcription repression by Xenopus ET and its human ortholog TBX3, a gene involved in ulnar-mammary syndrome. Proc Natl Acad Sci U S A 96(18), 10212-10217.	1
	XB-ART-40311	19802378	Bartlett, H.L., and Weeks, D.L. (2008). Lessons from the lily pad: Using Xenopus to understand heart disease. Drug Discov Today Dis Models 5(3), 141-146. doi: 10.1016/j.ddmod.2009.02.006.	1
human immunodeficiency virus infectious disease	XB-ART-1268	16213823	Maresca, T.J., Niederstrasser, H., Weis, K., and Heald, R. (2005). Xnf7 contributes to spindle integrity through its microtubule-bundling activity. Curr Biol 15(19), 1755-1761. doi: 10.1016/j.cub.2005.08.049.	1
	XB-ART-2862	15496402	Hertel, J., Struthers, H., Horj, C.B., and Hruz, P.W. (2004). A structural basis for the acute effects of HIV protease inhibitors on GLUT4 intrinsic activity. J Biol Chem 279(53), 55147-55152. doi: 10.1074/jbc.M410826200.	1
	XB-ART-3732	15068865	Isaguliants, M.G., Zuber, B., Boberg, A., Sjostrand, D., Belikov, S.V., Rollman, E., et al. (2004). Reverse transcriptase-based DNA vaccines against drug-resistant HIV-1 tested in a mouse model. Vaccine 22(13-14), 1810-1819. doi: 10.1016/j.vaccine.2003.10.052.	1
Huntington's disease	XB-ART-20188	7789994	Wang, Y.H., and Griffith, J. (1995). Expanded CTG triplet blocks from the myotonic dystrophy gene create the strongest known natural nucleosome positioning elements. Genomics 25(2), 570-573.	1
	XB-ART-287	16739728	Peters, R. (2006). Introduction to nucleocytoplasmic transport: molecules and mechanisms. Methods Mol Biol 322, 235-258. doi: 10.1007/978-1-59745-000-3_17.	1
	XB-ART-51029	26192473	Haremaki, T., Deglincerti, A., and Brivanlou, A.H. (2015). Huntingtin is required for ciliogenesis and neurogenesis during early Xenopus development. Dev Biol 408(2), 305-315. doi: 10.1016/j.ydbio.2015.07.013.	1
hydrolethalus syndrome	XB-ART-40436	19656802	Dammermann, A., Pemble, H., Mitchell, B.J., McLeod, I., Yates, J.R., 3rd, Kintner, C., et al. (2009). The hydrolethalus syndrome protein HYLS-1 links core centriole structure to cilia formation. Genes Dev 23(17), 2046-2059. doi: 10.1101/gad.1810409.	1
hypercalcemia	XB-ART-50793	26047794	Schlingmann, K.P., Ruminska, J., Kaufmann, M., Dursun, I., Patti, M., Kranz, B., et al. (2016). Autosomal-Recessive Mutations in SLC34A1 Encoding Sodium-Phosphate Cotransporter 2A Cause Idiopathic Infantile Hypercalcemia. J Am Soc Nephrol 27(2), 604-614. doi: 10.1681/asn.2014101025.	1
hyperekplexia	XB-ART-6725	12169101	Rea, R., Tijssen, M.A., Herd, C., Frants, R.R., and Kullmann, D.M. (2002). Functional characterization of compound heterozygosity for GlyRalpha1 mutations in the startle disease hyperekplexia. Eur J Neurosci 16(2), 186-196.	1
hyperekplexia 1	XB-ART-24049	1371219	Becker, C.M., Schmieden, V., Tarroni, P., Strasser, U., and Betz, H. (1992). Isoform-selective deficit of glycine receptors in the mouse mutant spastic. Neuron 8(2), 283-289.	1
hyperekplexia 2	XB-ART-47940	23992940	Lynagh, T., Kunz, A., and Laube, B. (2013). Propofol modulation of alpha1 glycine receptors does not require a structural transition at adjacent subunits that is crucial to agonist-induced activation. ACS Chem Neurosci 4(11), 1469-1478. doi: 10.1021/cn400134p.	1
hyperinsulinism	XB-ART-48474	24478723	Hosy, E., and Vivaudou, M. (2014). The unusual stoichiometry of ADP activation of the KATP channel. Front Physiol 5, 11. doi: 10.3389/fphys.2014.00011.	2
hyperkalemic periodic paralysis	XB-ART-51549	11015449	Felix, R. (2000). Channelopathies: ion channel defects linked to heritable clinical disorders. J Med Genet 37(10), 729-740.	1
hyperparathyroidism	XB-ART-19547	7602378	Brown, E.M., Pollak, M., Chou, Y.H., Seidman, C.E., Seidman, J.G., and Hebert, S.C. (1995). The cloning of extracellular Ca(2+)-sensing receptors from parathyroid and kidney: molecular mechanisms of extracellular Ca(2+)-sensing. J Nutr 125(7 Suppl), 1965s-1970s.	1
hypersensitivity reaction type II disease	XB-ART-52205	26595158	Pucca, M.B., Bertolini, T.B., Cerni, F.A., Bordon, K.C., Peigneur, S., Tytgat, J., et al. (2016). Immunosuppressive evidence of Tityus serrulatus toxins Ts6 and Ts15: insights of a novel K(+) channel pattern in T cells. Immunology 147(2), 240-250. doi: 10.1111/imm.12559.	1
hypertension	XB-ART-19758	7762608	McDonald, F.J., Price, M.P., Snyder, P.M., and Welsh, M.J. (1995). Cloning and expression of the beta- and gamma-subunits of the human epithelial sodium channel. Am J Physiol 268(5 Pt 1), C1157-1163. doi: 10.1152/ajpcell.1995.268.5.C1157.	1
	XB-ART-198	16790709	August, P., and Suthanthiran, M. (2006). Transforming growth factor beta signaling, vascular remodeling, and hypertension. N Engl J Med 354(25), 2721-2723. doi: 10.1056/NEJMcibr062143.	1
	XB-ART-4005	14766743	Moreno, E., Tovar-Palacio, C., de los Heros, P., Guzman, B., Bobadilla, N.A., Vazquez, N., et al. (2004). A single nucleotide polymorphism alters the activity of the renal Na+:Cl- cotransporter and reveals a role for transmembrane segment 4 in chloride and thiazide affinity. J Biol Chem 279(16), 16553-16560. doi: 10.1074/jbc.M400602200.	1
	XB-ART-45358	22668601	Krumm, P., Giraldez, T., Alvarez de la Rosa, D., Clauss, W.G., Fronius, M., and Althaus, M. (2012). Thiol-reactive compounds from garlic inhibit the epithelial sodium channel (ENaC). Bioorg Med Chem 20(13), 3979-3984. doi: 10.1016/j.bmc.2012.05.021.	1
	XB-ART-50172	25547341	Morton, S.K., Chaston, D.J., Howitt, L., Heisler, J., Nicholson, B.J., Fairweather, S., et al. (2015). Loss of functional endothelial connexin40 results in exercise-induced hypertension in mice. Hypertension 65(3), 662-669. doi: 10.1161/hypertensionaha.114.04578.	1
	XB-ART-51552	26561651	Tutakhel, O.A., Jelen, S., Valdez-Flores, M., Dimke, H., Piersma, S.R., Jimenez, C.R., et al. (2016). Alternative splice variant of the thiazide-sensitive NaCl cotransporter: a novel player in renal salt handling. Am J Physiol Renal Physiol 310(3), F204-216. doi: 10.1152/ajprenal.00429.2015.	1
	XB-ART-595	16530041	Zacchigna, L., Vecchione, C., Notte, A., Cordenonsi, M., Dupont, S., Maretto, S., et al. (2006). Emilin1 links TGF-beta maturation to blood pressure homeostasis. Cell 124(5), 929-942. doi: 10.1016/j.cell.2005.12.035.	1
	XB-ART-770	16446421	de Los Heros, P., Kahle, K.T., Rinehart, J., Bobadilla, N.A., Vazquez, N., San Cristobal, P., et al. (2006). WNK3 bypasses the tonicity requirement for K-Cl cotransporter activation via a phosphatase-dependent pathway. Proc Natl Acad Sci U S A 103(6), 1976-1981. doi: 10.1073/pnas.0510947103.	1
	XB-ART-82	16887815	Pacheco-Alvarez, D., Cristobal, P.S., Meade, P., Moreno, E., Vazquez, N., Munoz, E., et al. (2006). The Na+:Cl- cotransporter is activated and phosphorylated at the amino-terminal domain upon intracellular chloride depletion. J Biol Chem 281(39), 28755-28763. doi: 10.1074/jbc.M603773200.	1
hyperuricemia	XB-ART-42006	20810651	Jutabha, P., Anzai, N., Kitamura, K., Taniguchi, A., Kaneko, S., Yan, K., et al. (2010). Human sodium phosphate transporter 4 (hNPT4/SLC17A3) as a common renal secretory pathway for drugs and urate. J Biol Chem 285(45), 35123-35132. doi: 10.1074/jbc.M110.121301.	1
hypokalemic periodic paralysis	XB-ART-50841	25024265	Mi, W., Rybalchenko, V., and Cannon, S.C. (2014). Disrupted coupling of gating charge displacement to Na+ current activation for DIIS4 mutations in hypokalemic periodic paralysis. J Gen Physiol 144(2), 137-145. doi: 10.1085/jgp.201411199.	1
	XB-ART-54521	29386226	Wu, F., Quinonez, M., DiFranco, M., and Cannon, S.C. (2018). Stac3 enhances expression of human CaV1.1 in Xenopus oocytes and reveals gating pore currents in HypoPP mutant channels. J Gen Physiol. doi: 10.1085/jgp.201711962.	1
hypophosphatemia	XB-ART-20949	8070635	Collins, J.F., and Ghishan, F.K. (1994). Molecular cloning, functional expression, tissue distribution, and in situ hybridization of the renal sodium phosphate (Na+/P(i)) transporter in the control and hypophosphatemic mouse. Faseb j 8(11), 862-868.	1
	XB-ART-24689	1649826	Nakagawa, N., Arab, N., and Ghishan, F.K. (1991). Characterization of the defect in the Na(+)-phosphate transporter in vitamin D-resistant hypophosphatemic mice. J Biol Chem 266(21), 13616-13620.	1
	XB-ART-4272	14672348	Virkki, L.V., Forster, I.C., Hernando, N., Biber, J., and Murer, H. (2003). Functional characterization of two naturally occurring mutations in the human sodium-phosphate cotransporter type IIa. J Bone Miner Res 18(12), 2135-2141. doi: 10.1359/jbmr.2003.18.12.2135.	1
hypoplastic left heart syndrome	XB-ART-47246	23773997	Lalani, S.R., Ware, S.M., Wang, X., Zapata, G., Tian, Q., Franco, L.M., et al. (2013). MCTP2 is a dosage-sensitive gene required for cardiac outflow tract development. Hum Mol Genet 22(21), 4339-4348. doi: 10.1093/hmg/ddt283.	1
hypothyroidism	XB-ART-39897	19426954	Yang, T., Gurrola, J.G., 2nd, Wu, H., Chiu, S.M., Wangemann, P., Snyder, P.M., et al. (2009). Mutations of KCNJ10 together with mutations of SLC26A4 cause digenic nonsyndromic hearing loss associated with enlarged vestibular aqueduct syndrome. Am J Hum Genet 84(5), 651-657. doi: 10.1016/j.ajhg.2009.04.014.	1
	XB-ART-50210	25744725	Buchholz, D.R. (2015). More similar than you think: Frog metamorphosis as a model of human perinatal endocrinology. Dev Biol 408(2), 188-195. doi: 10.1016/j.ydbio.2015.02.018.	1
	XB-ART-51512	26546975	Bhattacharya, D., Marfo, C.A., Li, D., Lane, M., and Khokha, M.K. (2015). CRISPR/Cas9: An inexpensive, efficient loss of function tool to screen human disease genes in Xenopus. Dev Biol 408(2), 196-204. doi: 10.1016/j.ydbio.2015.11.003.	1
hypotrichosis	XB-ART-41455	20393562	Shimomura, Y., Agalliu, D., Vonica, A., Luria, V., Wajid, M., Baumer, A., et al. (2010). APCDD1 is a novel Wnt inhibitor mutated in hereditary hypotrichosis simplex. Nature 464(7291), 1043-1047. doi: 10.1038/nature08875.	1
ichthyosis	XB-ART-46962	21933662	Scott, C.A., Tattersall, D., O'Toole, E.A., and Kelsell, D.P. (2012). Connexins in epidermal homeostasis and skin disease. Biochim Biophys Acta 1818(8), 1952-1961. doi: 10.1016/j.bbamem.2011.09.004.	1
idiopathic generalized epilepsy	XB-ART-4465	14597328	Macdonald, R.L., Bianchi, M.T., and Feng, H. (2003). Mutations linked to generalized epilepsy in humans reduce GABA(A) receptor current. Exp Neurol 184 Suppl 1, S58-67.	1
idiopathic scoliosis	XB-ART-40303	19812323	Lambert, F.M., Malinvaud, D., Glaunes, J., Bergot, C., Straka, H., and Vidal, P.P. (2009). Vestibular asymmetry as the cause of idiopathic scoliosis: a possible answer from Xenopus. J Neurosci 29(40), 12477-12483. doi: 10.1523/jneurosci.2583-09.2009.	1
	XB-ART-46933	23595743	Lambert, F.M., Malinvaud, D., Gratacap, M., Straka, H., and Vidal, P.P. (2013). Restricted neural plasticity in vestibulospinal pathways after unilateral labyrinthectomy as the origin for scoliotic deformations. J Neurosci 33(16), 6845-6856. doi: 10.1523/jneurosci.4842-12.2013.	1
immune system disease	XB-ART-9377	11257091	Xiao, G.Q., Hu, K., and Boutjdir, M. (2001). Direct inhibition of expressed cardiac l- and t-type calcium channels by igg from mothers whose children have congenital heart block. Circulation 103(11), 1599-1604.	1
immunodeficiency-centromeric instability-facial anomalies syndrome	XB-ART-54461	29339483	Jenness, C., Giunta, S., Muller, M.M., Kimura, H., Muir, T.W., and Funabiki, H. (2018). HELLS and CDCA7 comprise a bipartite nucleosome remodeling complex defective in ICF syndrome. Proc Natl Acad Sci U S A 115(5), E876-e885. doi: 10.1073/pnas.1717509115.	1
impaired renal function disease	XB-ART-37744	18492243	Raciti, D., Reggiani, L., Geffers, L., Jiang, Q., Bacchion, F., Subrizi, A.E., et al. (2008). Organization of the pronephric kidney revealed by large-scale gene expression mapping. Genome Biol 9(5), R84. doi: 10.1186/gb-2008-9-5-r84.	1
	XB-ART-38102	18620882	Lee, C.H., Huang, P.T., Lou, K.L., and Liou, H.H. (2008). Functional and structural characterization of PKA-mediated pHi gating of ROMK1 channels. J Mol Graph Model 27(3), 332-341. doi: 10.1016/j.jmgm.2008.06.001.	1
	XB-ART-38287	18723859	Schafer, T., Putz, M., Lienkamp, S., Ganner, A., Bergbreiter, A., Ramachandran, H., et al. (2008). Genetic and physical interaction between the NPHP5 and NPHP6 gene products. Hum Mol Genet 17(23), 3655-3662. doi: 10.1093/hmg/ddn260.	1
	XB-ART-39015	18653713	Suga, H., Nagasaki, H., Kondo, T.A., Okajima, Y., Suzuki, C., Ozaki, N., et al. (2008). Novel treatment for lithium-induced nephrogenic diabetes insipidus rat model using the Sendai-virus vector carrying aquaporin 2 gene. Endocrinology 149(11), 5803-5810. doi: 10.1210/en.2007-1806.	1
impotence	XB-ART-50867	26119670	Silva, C.N., Nunes, K.P., Torres, F.S., Cassoli, J.S., Santos, D.M., Almeida Fde, M., et al. (2015). PnPP-19, a Synthetic and Nontoxic Peptide Designed from a Phoneutria nigriventer Toxin, Potentiates Erectile Function via NO/cGMP. J Urol 194(5), 1481-1490. doi: 10.1016/j.juro.2015.06.081.	1
inclusion body myositis	XB-ART-43375	20960530	Calcaterra, N.B., Armas, P., Weiner, A.M., and Borgognone, M. (2010). CNBP: a multifunctional nucleic acid chaperone involved in cell death and proliferation control. IUBMB Life 62(10), 707-714. doi: 10.1002/iub.379.	1
	XB-ART-5802	12562926	Grassi, F., Palma, E., Tonini, R., Amici, M., Ballivet, M., and Eusebi, F. (2003). Amyloid beta(1-42) peptide alters the gating of human and mouse alpha-bungarotoxin-sensitive nicotinic receptors. J Physiol 547(Pt 1), 147-157. doi: 10.1113/jphysiol.2002.035436.	1
	XB-ART-7959	11744158	van den Hurk, W.H., Bloemen, M., and Martens, G.J. (2001). Expression of the gene encoding the beta-amyloid precursor protein APP in Xenopus laevis. Brain Res Mol Brain Res 97(1), 13-20.	1
infantile epileptic encephalopathy	XB-ART-46597	23339110	Edvardson, S., Oz, S., Abulhijaa, F.A., Taher, F.B., Shaag, A., Zenvirt, S., et al. (2013). Early infantile epileptic encephalopathy associated with a high voltage gated calcium channelopathy. J Med Genet 50(2), 118-123. doi: 10.1136/jmedgenet-2012-101223.	1
	XB-ART-47654	24272827	Lemke, J.R., Hendrickx, R., Geider, K., Laube, B., Schwake, M., Harvey, R.J., et al. (2014). GRIN2B mutations in West syndrome and intellectual disability with focal epilepsy. Ann Neurol 75(1), 147-154. doi: 10.1002/ana.24073.	1
infertility	XB-ART-23620	1324422	Tsutsumi, M., Zhou, W., Millar, R.P., Mellon, P.L., Roberts, J.L., Flanagan, C.A., et al. (1992). Cloning and functional expression of a mouse gonadotropin-releasing hormone receptor. Mol Endocrinol 6(7), 1163-1169. doi: 10.1210/mend.6.7.1324422.	1
	XB-ART-35790	17450123	Mitchell, B., Jacobs, R., Li, J., Chien, S., and Kintner, C. (2007). A positive feedback mechanism governs the polarity and motion of motile cilia. Nature 447(7140), 97-101. doi: 10.1038/nature05771.	1
	XB-ART-37556	18395276	Oka, T., Tooi, O., Mitsui, N., Miyahara, M., Ohnishi, Y., Takase, M., et al. (2008). Effect of atrazine on metamorphosis and sexual differentiation in Xenopus laevis. Aquat Toxicol 87(4), 215-226. doi: 10.1016/j.aquatox.2008.02.009.	1
	XB-ART-38724	19008211	Kloas, W., Lutz, I., Springer, T., Krueger, H., Wolf, J., Holden, L., et al. (2009). Does atrazine influence larval development and sexual differentiation in Xenopus laevis? Toxicol Sci 107(2), 376-384. doi: 10.1093/toxsci/kfn232.	1
	XB-ART-41232	20194757	Hayes, T.B., Khoury, V., Narayan, A., Nazir, M., Park, A., Brown, T., et al. (2010). Atrazine induces complete feminization and chemical castration in male African clawed frogs (Xenopus laevis). Proc Natl Acad Sci U S A 107(10), 4612-4617. doi: 10.1073/pnas.0909519107.	1
	XB-ART-5822	12558173	Carr, J.A., Gentles, A., Smith, E.E., Goleman, W.L., Urquidi, L.J., Thuett, K., et al. (2003). Response of larval Xenopus laevis to atrazine: assessment of growth, metamorphosis, and gonadal and laryngeal morphology. Environ Toxicol Chem 22(2), 396-405.	1
infertility due to extratesticular cause	XB-ART-5485	12676614	Qin, Z.F., Zhou, J.M., Chu, S.G., and Xu, X.B. (2003). Effects of Chinese domestic polychlorinated biphenyls (PCBs) on gonadal differentiation in Xenopus laevis. Environ Health Perspect 111(4), 553-556.	1
inflammatory bowel disease	XB-ART-39785	19478043	Kalin, R.E., Banziger-Tobler, N.E., Detmar, M., and Brandli, A.W. (2009). An in vivo chemical library screen in Xenopus tadpoles reveals novel pathways involved in angiogenesis and lymphangiogenesis. Blood 114(5), 1110-1122. doi: 10.1182/blood-2009-03-211771.	1
	XB-ART-43032	21183475	Dubaissi, E., and Papalopulu, N. (2011). Embryonic frog epidermis: a model for the study of cell-cell interactions in the development of mucociliary disease. Dis Model Mech 4(2), 179-192. doi: 10.1242/dmm.006494.	1
	XB-ART-54087	28971850	Amir Shaghaghi, M., Zhouyao, H., Tu, H., El-Gabalawy, H., Crow, G.H., Levine, M., et al. (2017). The SLC2A14 gene, encoding the novel glucose/dehydroascorbate transporter GLUT14, is associated with inflammatory bowel disease. Am J Clin Nutr 106(6), 1508-1513. doi: 10.3945/ajcn.116.147603.	1
inner ear disease	XB-ART-51592	26582541	Ramirez-Gordillo, D., Powers, T.R., van Velkinburgh, J.C., Trujillo-Provencio, C., Schilkey, F., and Serrano, E.E. (2015). RNA-Seq and microarray analysis of the Xenopus inner ear transcriptome discloses orthologous OMIM((R)) genes for hereditary disorders of hearing and balance. BMC Res Notes 8, 691. doi: 10.1186/s13104-015-1485-1.	2
intellectual disability	XB-ART-36793	18006581	Wuttke, T.V., Penzien, J., Fauler, M., Seebohm, G., Lehmann-Horn, F., Lerche, H., et al. (2008). Neutralization of a negative charge in the S1-S2 region of the KV7.2 (KCNQ2) channel affects voltage-dependent activation in neonatal epilepsy. J Physiol 586(2), 545-555. doi: 10.1113/jphysiol.2007.143826.	1
	XB-ART-47654	24272827	Lemke, J.R., Hendrickx, R., Geider, K., Laube, B., Schwake, M., Harvey, R.J., et al. (2014). GRIN2B mutations in West syndrome and intellectual disability with focal epilepsy. Ann Neurol 75(1), 147-154. doi: 10.1002/ana.24073.	1
	XB-ART-51512	26546975	Bhattacharya, D., Marfo, C.A., Li, D., Lane, M., and Khokha, M.K. (2015). CRISPR/Cas9: An inexpensive, efficient loss of function tool to screen human disease genes in Xenopus. Dev Biol 408(2), 196-204. doi: 10.1016/j.ydbio.2015.11.003.	1
Jervell-Lange Nielsen syndrome	XB-ART-2781	15527815	McCrossan, Z.A., and Abbott, G.W. (2004). The MinK-related peptides. Neuropharmacology 47(6), 787-821. doi: 10.1016/j.neuropharm.2004.06.018.	1
Joubert syndrome 17	XB-ART-54092	27158779	Toriyama, M., Lee, C., Taylor, S.P., Duran, I., Cohn, D.H., Bruel, A.L., et al. (2016). The ciliopathy-associated CPLANE proteins direct basal body recruitment of intraflagellar transport machinery. Nat Genet 48(6), 648-656. doi: 10.1038/ng.3558.	1
Kallmann syndrome	XB-ART-48818	24728844	Schulz, Y., Wehner, P., Opitz, L., Salinas-Riester, G., Bongers, E.M., van Ravenswaaij-Arts, C.M., et al. (2014). CHD7, the gene mutated in CHARGE syndrome, regulates genes involved in neural crest cell guidance. Hum Genet 133(8), 997-1009. doi: 10.1007/s00439-014-1444-2.	1
	XB-ART-54394	29277616	Bae, C.J., Hong, C.S., and Saint-Jeannet, J.P. (2018). Anosmin-1 is essential for neural crest and cranial placodes formation in Xenopus. Biochem Biophys Res Commun 495(3), 2257-2263. doi: 10.1016/j.bbrc.2017.12.127.	1
Kennedy's disease	XB-ART-20188	7789994	Wang, Y.H., and Griffith, J. (1995). Expanded CTG triplet blocks from the myotonic dystrophy gene create the strongest known natural nucleosome positioning elements. Genomics 25(2), 570-573.	1
kidney cancer	XB-ART-45452	22719994	Li, L., Wen, L., Gong, Y., Mei, G., Liu, J., Chen, Y., et al. (2012). Xenopus as a model system for the study of GOLPH2/GP73 function: Xenopus GOLPH2 is required for pronephros development. PLoS One 7(6), e38939. doi: 10.1371/journal.pone.0038939.	2
kidney disease	XB-ART-35036	17186942	Gimenez, I., and Forbush, B. (2007). The residues determining differences in ion affinities among the alternative splice variants F, A, and B of the mammalian renal Na-K-Cl cotransporter (NKCC2). J Biol Chem 282(9), 6540-6547. doi: 10.1074/jbc.M610780200.	1
	XB-ART-37744	18492243	Raciti, D., Reggiani, L., Geffers, L., Jiang, Q., Bacchion, F., Subrizi, A.E., et al. (2008). Organization of the pronephric kidney revealed by large-scale gene expression mapping. Genome Biol 9(5), R84. doi: 10.1186/gb-2008-9-5-r84.	1
	XB-ART-38102	18620882	Lee, C.H., Huang, P.T., Lou, K.L., and Liou, H.H. (2008). Functional and structural characterization of PKA-mediated pHi gating of ROMK1 channels. J Mol Graph Model 27(3), 332-341. doi: 10.1016/j.jmgm.2008.06.001.	1
	XB-ART-38287	18723859	Schafer, T., Putz, M., Lienkamp, S., Ganner, A., Bergbreiter, A., Ramachandran, H., et al. (2008). Genetic and physical interaction between the NPHP5 and NPHP6 gene products. Hum Mol Genet 17(23), 3655-3662. doi: 10.1093/hmg/ddn260.	1
	XB-ART-42713	21262879	Abbas, L., Hajihashemi, S., Stead, L.F., Cooper, G.J., Ware, T.L., Munsey, T.S., et al. (2011). Functional and developmental expression of a zebrafish Kir1.1 (ROMK) potassium channel homologue Kcnj1. J Physiol 589(Pt 6), 1489-1503. doi: 10.1113/jphysiol.2010.200295.	1
	XB-ART-53182	28401306	Getwan, M., and Lienkamp, S.S. (2017). Toolbox in a tadpole: Xenopus for kidney research. Cell Tissue Res 369(1), 143-157. doi: 10.1007/s00441-017-2611-2.	1
kidney failure	XB-ART-42492	21173145	Wellhauser, L., Luna-Chavez, C., D'Antonio, C., Tainer, J., and Bear, C.E. (2011). ATP induces conformational changes in the carboxyl-terminal region of ClC-5. J Biol Chem 286(8), 6733-6741. doi: 10.1074/jbc.M110.175877.	1
Lambert-Eaton myasthenic syndrome	XB-ART-11204	10766861	Gao, B., Sekido, Y., Maximov, A., Saad, M., Forgacs, E., Latif, F., et al. (2000). Functional properties of a new voltage-dependent calcium channel alpha(2)delta auxiliary subunit gene (CACNA2D2). J Biol Chem 275(16), 12237-12242.	2
Landau-Kleffner syndrome	XB-ART-51334	23933819	Lemke, J.R., Lal, D., Reinthaler, E.M., Steiner, I., Nothnagel, M., Alber, M., et al. (2013). Mutations in GRIN2A cause idiopathic focal epilepsy with rolandic spikes. Nat Genet 45(9), 1067-1072. doi: 10.1038/ng.2728.	1
Leri-Weill dyschondrosteosis	XB-ART-4731	12960152	Blaschke, R.J., Topfer, C., Marchini, A., Steinbeisser, H., Janssen, J.W., and Rappold, G.A. (2003). Transcriptional and translational regulation of the Leri-Weill and Turner syndrome homeobox gene SHOX. J Biol Chem 278(48), 47820-47826. doi: 10.1074/jbc.M306685200.	1
lethal restrictive dermopathy	XB-ART-39737	19450502	Schape, J., Prausse, S., Radmacher, M., and Stick, R. (2009). Influence of lamin A on the mechanical properties of amphibian oocyte nuclei measured by atomic force microscopy. Biophys J 96(10), 4319-4325. doi: 10.1016/j.bpj.2009.02.048.	1
leukemia	XB-ART-16144	9309189	Robey, E. (1997). Notch in vertebrates. Curr Opin Genet Dev 7(4), 551-557.	3
	XB-ART-7659	11840327	Davis, R.L., and Turner, D.L. (2001). Vertebrate hairy and Enhancer of split related proteins: transcriptional repressors regulating cellular differentiation and embryonic patterning. Oncogene 20(58), 8342-8357. doi: 10.1038/sj.onc.1205094.	3
leukodystrophy	XB-ART-45224	22405205	Jeworutzki, E., Lopez-Hernandez, T., Capdevila-Nortes, X., Sirisi, S., Bengtsson, L., Montolio, M., et al. (2012). GlialCAM, a protein defective in a leukodystrophy, serves as a ClC-2 Cl(-) channel auxiliary subunit. Neuron 73(5), 951-961. doi: 10.1016/j.neuron.2011.12.039.	1
Liddle syndrome	XB-ART-18904	8524790	Hansson, J.H., Schild, L., Lu, Y., Wilson, T.A., Gautschi, I., Shimkets, R., et al. (1995). A de novo missense mutation of the beta subunit of the epithelial sodium channel causes hypertension and Liddle syndrome, identifying a proline-rich segment critical for regulation of channel activity. Proc Natl Acad Sci U S A 92(25), 11495-11499.	1
	XB-ART-19758	7762608	McDonald, F.J., Price, M.P., Snyder, P.M., and Welsh, M.J. (1995). Cloning and expression of the beta- and gamma-subunits of the human epithelial sodium channel. Am J Physiol 268(5 Pt 1), C1157-1163. doi: 10.1152/ajpcell.1995.268.5.C1157.	1
	XB-ART-38867	18784262	Yu, L., Helms, M.N., Yue, Q., and Eaton, D.C. (2008). Single-channel analysis of functional epithelial sodium channel (ENaC) stability at the apical membrane of A6 distal kidney cells. Am J Physiol Renal Physiol 295(5), F1519-1527. doi: 10.1152/ajprenal.00605.2007.	1
	XB-ART-51323	25483587	Patel, A.B., Yang, L., Deng, S., and Palmer, L.G. (2014). Feedback inhibition of ENaC: acute and chronic mechanisms. Channels (Austin) 8(5), 444-451. doi: 10.4161/19336950.2014.949190.	1
lipid metabolism disorder	XB-ART-21964	8111381	Shoulders, C.C., Brett, D.J., Bayliss, J.D., Narcisi, T.M., Jarmuz, A., Grantham, T.T., et al. (1993). Abetalipoproteinemia is caused by defects of the gene encoding the 97 kDa subunit of a microsomal triglyceride transfer protein. Hum Mol Genet 2(12), 2109-2116.	1
liver cirrhosis	XB-ART-52667	27784267	Robson, A., Owens, N.D., Baserga, S.J., Khokha, M.K., and Griffin, J.N. (2016). Expression of ribosomopathy genes during Xenopus tropicalis embryogenesis. BMC Dev Biol 16(1), 38. doi: 10.1186/s12861-016-0138-5.	2
liver disease	XB-ART-45452	22719994	Li, L., Wen, L., Gong, Y., Mei, G., Liu, J., Chen, Y., et al. (2012). Xenopus as a model system for the study of GOLPH2/GP73 function: Xenopus GOLPH2 is required for pronephros development. PLoS One 7(6), e38939. doi: 10.1371/journal.pone.0038939.	2
Loeys-Dietz syndrome	XB-ART-48086	23824657	Rienhoff, H.Y., Jr., Yeo, C.Y., Morissette, R., Khrebtukova, I., Melnick, J., Luo, S., et al. (2013). A mutation in TGFB3 associated with a syndrome of low muscle mass, growth retardation, distal arthrogryposis and clinical features overlapping with Marfan and Loeys-Dietz syndrome. Am J Med Genet A 161a(8), 2040-2046. doi: 10.1002/ajmg.a.36056.	1
long QT syndrome	XB-ART-19515	7603988	England, S.K., Uebele, V.N., Shear, H., Kodali, J., Bennett, P.B., and Tamkun, M.M. (1995). Characterization of a voltage-gated K+ channel beta subunit expressed in human heart. Proc Natl Acad Sci U S A 92(14), 6309-6313.	1
	XB-ART-2781	15527815	McCrossan, Z.A., and Abbott, G.W. (2004). The MinK-related peptides. Neuropharmacology 47(6), 787-821. doi: 10.1016/j.neuropharm.2004.06.018.	1
	XB-ART-35315	17292394	Tsuji, K., Akao, M., Ishii, T.M., Ohno, S., Makiyama, T., Takenaka, K., et al. (2007). Mechanistic basis for the pathogenesis of long QT syndrome associated with a common splicing mutation in KCNQ1 gene. J Mol Cell Cardiol 42(3), 662-669. doi: 10.1016/j.yjmcc.2006.12.015.	1
	XB-ART-39247	19232322	Scholz, E.P., Niemer, N., Hassel, D., Zitron, E., Burgers, H.F., Bloehs, R., et al. (2009). Biophysical properties of zebrafish ether-a-go-go related gene potassium channels. Biochem Biophys Res Commun 381(2), 159-164. doi: 10.1016/j.bbrc.2009.02.042.	1
	XB-ART-42680	21241800	Aidery, P., Kisselbach, J., Schweizer, P.A., Becker, R., Katus, H.A., and Thomas, D. (2011). Biophysical properties of mutant KCNQ1 S277L channels linked to hereditary long QT syndrome with phenotypic variability. Biochim Biophys Acta 1812(4), 488-494. doi: 10.1016/j.bbadis.2011.01.008.	1
	XB-ART-49793	24782544	Lacroix, J.J., Hyde, H.C., Campos, F.V., and Bezanilla, F. (2014). Moving gating charges through the gating pore in a Kv channel voltage sensor. Proc Natl Acad Sci U S A 111(19), E1950-1959. doi: 10.1073/pnas.1406161111.	1
	XB-ART-50835	26066609	Steffensen, A.B., Refaat, M.M., David, J.P., Mujezinovic, A., Calloe, K., Wojciak, J., et al. (2015). High incidence of functional ion-channel abnormalities in a consecutive Long QT cohort with novel missense genetic variants of unknown significance. Sci Rep 5, 10009. doi: 10.1038/srep10009.	1
	XB-ART-51890	26920202	Refaat, M.M., El Hage, L., Steffensen, A.B., Hotait, M., Schmitt, N., Scheinman, M., et al. (2016). Iron Overload Leading to Torsades de Pointes in beta-Thalassemia and Long QT Syndrome. Card Electrophysiol Clin 8(1), 247-256. doi: 10.1016/j.ccep.2015.10.037.	1
	XB-ART-54726	29582136	Chua, H.C., Servatius, H., Asatryan, B., Schaller, A., Rieubland, C., Noti, F., et al. (2018). Unexplained cardiac arrest: a tale of conflicting interpretations of KCNQ1 genetic test results. Clin Res Cardiol. doi: 10.1007/s00392-018-1233-3.	1
	XB-ART-9626	11166117	Kearney, J.A., Plummer, N.W., Smith, M.R., Kapur, J., Cummins, T.R., Waxman, S.G., et al. (2001). A gain-of-function mutation in the sodium channel gene Scn2a results in seizures and behavioral abnormalities. Neuroscience 102(2), 307-317.	1
long QT syndrome 1	XB-ART-35315	17292394	Tsuji, K., Akao, M., Ishii, T.M., Ohno, S., Makiyama, T., Takenaka, K., et al. (2007). Mechanistic basis for the pathogenesis of long QT syndrome associated with a common splicing mutation in KCNQ1 gene. J Mol Cell Cardiol 42(3), 662-669. doi: 10.1016/j.yjmcc.2006.12.015.	1
	XB-ART-40437	19651618	Gustina, A.S., and Trudeau, M.C. (2009). A recombinant N-terminal domain fully restores deactivation gating in N-truncated and long QT syndrome mutant hERG potassium channels. Proc Natl Acad Sci U S A 106(31), 13082-13087. doi: 10.1073/pnas.0900180106.	1
	XB-ART-43643	21810471	Tsuji-Wakisaka, K., Akao, M., Ishii, T.M., Ashihara, T., Makiyama, T., Ohno, S., et al. (2011). Identification and functional characterization of KCNQ1 mutations around the exon 7-intron 7 junction affecting the splicing process. Biochim Biophys Acta 1812(11), 1452-1459. doi: 10.1016/j.bbadis.2011.07.011.	1
	XB-ART-44233	21691061	Strutz-Seebohm, N., Pusch, M., Wolf, S., Stoll, R., Tapken, D., Gerwert, K., et al. (2011). Structural basis of slow activation gating in the cardiac I Ks channel complex. Cell Physiol Biochem 27(5), 443-452. doi: 10.1159/000329965.	1
	XB-ART-45986	23000022	Aidery, P., Kisselbach, J., Schweizer, P.A., Becker, R., Katus, H.A., and Thomas, D. (2012). Impaired ion channel function related to a common KCNQ1 mutation - implications for risk stratification in long QT syndrome 1. Gene 511(1), 26-33. doi: 10.1016/j.gene.2012.09.041.	1
long QT syndrome 2	XB-ART-10246	11009462	Ficker, E., Thomas, D., Viswanathan, P.C., Dennis, A.T., Priori, S.G., Napolitano, C., et al. (2000). Novel characteristics of a misprocessed mutant HERG channel linked to hereditary long QT syndrome. Am J Physiol Heart Circ Physiol 279(4), H1748-1756. doi: 10.1152/ajpheart.2000.279.4.H1748.	1
	XB-ART-47809	24334129	Mechakra, A., Vincent, Y., Chevalier, P., Millat, G., Ficker, E., Jastrzebski, M., et al. (2014). The variant hERG/R148W associated with LQTS is a mutation that reduces current density on co-expression with the WT. Gene 536(2), 348-356. doi: 10.1016/j.gene.2013.11.072.	1
long QT syndrome 5	XB-ART-12599	10428953	Abitbol, I., Peretz, A., Lerche, C., Busch, A.E., and Attali, B. (1999). Stilbenes and fenamates rescue the loss of I(KS) channel function induced by an LQT5 mutation and other IsK mutants. EMBO J 18(15), 4137-4148. doi: 10.1093/emboj/18.15.4137.	1
	XB-ART-44233	21691061	Strutz-Seebohm, N., Pusch, M., Wolf, S., Stoll, R., Tapken, D., Gerwert, K., et al. (2011). Structural basis of slow activation gating in the cardiac I Ks channel complex. Cell Physiol Biochem 27(5), 443-452. doi: 10.1159/000329965.	1
lymphadenitis	XB-ART-35784	17458498	Makinen, T., Norrmen, C., and Petrova, T.V. (2007). Molecular mechanisms of lymphatic vascular development. Cell Mol Life Sci 64(15), 1915-1929. doi: 10.1007/s00018-007-7040-z.	1
lymphatic system cancer	XB-ART-39785	19478043	Kalin, R.E., Banziger-Tobler, N.E., Detmar, M., and Brandli, A.W. (2009). An in vivo chemical library screen in Xenopus tadpoles reveals novel pathways involved in angiogenesis and lymphangiogenesis. Blood 114(5), 1110-1122. doi: 10.1182/blood-2009-03-211771.	2
lymphedema	XB-ART-35784	17458498	Makinen, T., Norrmen, C., and Petrova, T.V. (2007). Molecular mechanisms of lymphatic vascular development. Cell Mol Life Sci 64(15), 1915-1929. doi: 10.1007/s00018-007-7040-z.	1
macular degeneration	XB-ART-47275	23805033	Liu, C., Sherpa, T., and Varnum, M.D. (2013). Disease-associated mutations in CNGB3 promote cytotoxicity in photoreceptor-derived cells. Mol Vis 19, 1268-1281.	2
malaria	XB-ART-40152	19669815	Jones, A.K., Buckingham, S.D., Brown, L.A., and Sattelle, D.B. (2009). Alternative splicing of the Anopheles gambiae nicotinic acetylcholine receptor, Agamalphabeta9, generates both alpha and beta subunits. Invert Neurosci 9(2), 77-84. doi: 10.1007/s10158-009-0089-7.	1
	XB-ART-42082	20869441	Hu, Z., Du, Y., Nomura, Y., and Dong, K. (2011). A sodium channel mutation identified in Aedes aegypti selectively reduces cockroach sodium channel sensitivity to type I, but not type II pyrethroids. Insect Biochem Mol Biol 41(1), 9-13. doi: 10.1016/j.ibmb.2010.09.005.	1
	XB-ART-45469	22200948	Rubinos, C., Sanchez, H.A., Verselis, V.K., and Srinivas, M. (2012). Mechanism of inhibition of connexin channels by the quinine derivative N-benzylquininium. J Gen Physiol 139(1), 69-82. doi: 10.1085/jgp.201110678.	1
	XB-ART-50505	24161619	Beckman, M.L., Pramod, A.B., Perley, D., and Henry, L.K. (2014). Stereoselective inhibition of serotonin transporters by antimalarial compounds. Neurochem Int 73, 98-106. doi: 10.1016/j.neuint.2013.10.009.	1
	XB-ART-6521	12238947	Joet, T., Holterman, L., Stedman, T.T., Kocken, C.H., Van Der Wel, A., Thomas, A.W., et al. (2002). Comparative characterization of hexose transporters of Plasmodium knowlesi, Plasmodium yoelii and Toxoplasma gondii highlights functional differences within the apicomplexan family. Biochem J 368(Pt 3), 923-929. doi: 10.1042/bj20021189.	1
male infertility	XB-ART-37556	18395276	Oka, T., Tooi, O., Mitsui, N., Miyahara, M., Ohnishi, Y., Takase, M., et al. (2008). Effect of atrazine on metamorphosis and sexual differentiation in Xenopus laevis. Aquat Toxicol 87(4), 215-226. doi: 10.1016/j.aquatox.2008.02.009.	1
	XB-ART-38724	19008211	Kloas, W., Lutz, I., Springer, T., Krueger, H., Wolf, J., Holden, L., et al. (2009). Does atrazine influence larval development and sexual differentiation in Xenopus laevis? Toxicol Sci 107(2), 376-384. doi: 10.1093/toxsci/kfn232.	1
malignant glioma	XB-ART-45637	22772605	Yuan, B., Xian, R., Ma, J., Chen, Y., Lin, C., and Song, Y. (2012). Isthmin inhibits glioma growth through antiangiogenesis in vivo. J Neurooncol 109(2), 245-252. doi: 10.1007/s11060-012-0910-8.	1
Marfan syndrome	XB-ART-34356	17027959	Skoglund, P., and Keller, R. (2007). Xenopus fibrillin regulates directed convergence and extension. Dev Biol 301(2), 404-416. doi: 10.1016/j.ydbio.2006.09.005.	3
	XB-ART-48086	23824657	Rienhoff, H.Y., Jr., Yeo, C.Y., Morissette, R., Khrebtukova, I., Melnick, J., Luo, S., et al. (2013). A mutation in TGFB3 associated with a syndrome of low muscle mass, growth retardation, distal arthrogryposis and clinical features overlapping with Marfan and Loeys-Dietz syndrome. Am J Med Genet A 161a(8), 2040-2046. doi: 10.1002/ajmg.a.36056.	3
maturity-onset diabetes of the young	XB-ART-51783	26806634	Kofent, J., and Spagnoli, F.M. (2016). Xenopus as a model system for studying pancreatic development and diabetes. Semin Cell Dev Biol 51, 106-116. doi: 10.1016/j.semcdb.2016.01.005.	1
maturity-onset diabetes of the young type 5	XB-ART-37571	18418350	Dudziak, K., Mottalebi, N., Senkel, S., Edghill, E.L., Rosengarten, S., Roose, M., et al. (2008). Transcription factor HNF1beta and novel partners affect nephrogenesis. Kidney Int 74(2), 210-217. doi: 10.1038/ki.2008.149.	1
	XB-ART-51813	26851624	Lienkamp, S.S. (2016). Using Xenopus to study genetic kidney diseases. Semin Cell Dev Biol 51, 117-124. doi: 10.1016/j.semcdb.2016.02.002.	1
Meckel syndrome	XB-ART-41813	20671153	Kim, S.K., Shindo, A., Park, T.J., Oh, E.C., Ghosh, S., Gray, R.S., et al. (2010). Planar cell polarity acts through septins to control collective cell movement and ciliogenesis. Science 329(5997), 1337-1340. doi: 10.1126/science.1191184.	1
Meckel syndrome 6	XB-ART-41813	20671153	Kim, S.K., Shindo, A., Park, T.J., Oh, E.C., Ghosh, S., Gray, R.S., et al. (2010). Planar cell polarity acts through septins to control collective cell movement and ciliogenesis. Science 329(5997), 1337-1340. doi: 10.1126/science.1191184.	1
megalocornea	XB-ART-50372	25712132	Pfirrmann, T., Emmerich, D., Ruokonen, P., Quandt, D., Buchen, R., Fischer-Zirnsak, B., et al. (2015). Molecular mechanism of CHRDL1-mediated X-linked megalocornea in humans and in Xenopus model. Hum Mol Genet 24(11), 3119-3132. doi: 10.1093/hmg/ddv063.	2
melanoma	XB-ART-46254	23196890	Lobikin, M., Chernet, B., Lobo, D., and Levin, M. (2012). Resting potential, oncogene-induced tumorigenesis, and metastasis: the bioelectric basis of cancer in vivo. Phys Biol 9(6), 065002. doi: 10.1088/1478-3975/9/6/065002.	1
	XB-ART-52061	27101845	Gouignard, N., Maccarana, M., Strate, I., von Stedingk, K., Malmstrom, A., and Pera, E.M. (2016). Musculocontractural Ehlers-Danlos syndrome and neurocristopathies: dermatan sulfate is required for Xenopus neural crest cells to migrate and adhere to fibronectin. Dis Model Mech 9(6), 607-620. doi: 10.1242/dmm.024661.	1
	XB-ART-54144	29049289	Plouhinec, J.L., Medina-Ruiz, S., Borday, C., Bernard, E., Vert, J.P., Eisen, M.B., et al. (2017). A molecular atlas of the developing ectoderm defines neural, neural crest, placode, and nonneural progenitor identity in vertebrates. PLoS Biol 15(10), e2004045. doi: 10.1371/journal.pbio.2004045.	1
MELAS syndrome	XB-ART-15075	9547220	Patel, A.J., Lauritzen, I., Lazdunski, M., and Honore, E. (1998). Disruption of mitochondrial respiration inhibits volume-regulated anion channels and provokes neuronal cell swelling. J Neurosci 18(9), 3117-3123.	1
	XB-ART-15370	9488440	Pinz, K.G., and Bogenhagen, D.F. (1998). Efficient repair of abasic sites in DNA by mitochondrial enzymes. Mol Cell Biol 18(3), 1257-1265.	1
mental depression	XB-ART-51129	26253075	Park, H.J., Baik, H.J., Kim, D.Y., Lee, G.Y., Woo, J.H., Zuo, Z., et al. (2015). Doxepin and imipramine but not fluoxetine reduce the activity of the rat glutamate transporter EAAT3 expressed in Xenopus oocytes. BMC Anesthesiol 15, 116. doi: 10.1186/s12871-015-0098-5.	1
	XB-ART-54058	28943291	Karim, N., Khan, I., Ahmad, N., Umar, M.N., and Gavande, N. (2017). Antidepressant, anticonvulsant and antinociceptive effects of 3'-methoxy-6-methylflavone and 3'-hydroxy-6-methylflavone may involve GABAergic mechanisms. Pharmacol Rep 69(5), 1014-1020. doi: 10.1016/j.pharep.2017.03.001.	1
MERRF syndrome	XB-ART-15370	9488440	Pinz, K.G., and Bogenhagen, D.F. (1998). Efficient repair of abasic sites in DNA by mitochondrial enzymes. Mol Cell Biol 18(3), 1257-1265.	1
microcephaly	XB-ART-3428	15193293	Peng, Y., Yang, P.H., Ng, S.S., Wong, O.G., Liu, J., He, M.L., et al. (2004). A critical role of Pax6 in alcohol-induced fetal microcephaly. Neurobiol Dis 16(2), 370-376. doi: 10.1016/j.nbd.2004.03.004.	1
	XB-ART-45822	22855829	Hirano, T. (2012). Condensins: universal organizers of chromosomes with diverse functions. Genes Dev 26(15), 1659-1678. doi: 10.1101/gad.194746.112.	1
microphthalmia	XB-ART-22027	8291895	Hauptman, O., Albert, D.M., Plowman, M.C., Hopfer, S.M., and Sunderman, F.W., Jr. (1993). Ocular malformations of Xenopus laevis exposed to nickel during embryogenesis. Ann Clin Lab Sci 23(6), 397-406.	2
	Xb-ART-34383	17010201	Hanel, M.L., and Hensey, C. (2006). Eye and neural defects associated with loss of GDF6. BMC Dev Biol 6, 43. doi: 10.1186/1471-213X-6-43.	2
	XB-ART-35973	17517692	Hilton, E.N., Manson, F.D., Urquhart, J.E., Johnston, J.J., Slavotinek, A.M., Hedera, P., et al. (2007). Left-sided embryonic expression of the BCL-6 corepressor, BCOR, is required for vertebrate laterality determination. Hum Mol Genet 16(14), 1773-1782. doi: 10.1093/hmg/ddm125.	2
	XB-ART-47052	23669349	Lee, J., Lee, B.K., and Gross, J.M. (2013). Bcl6a function is required during optic cup formation to prevent p53-dependent apoptosis and colobomata. Hum Mol Genet 22(17), 3568-3582. doi: 10.1093/hmg/ddt211.	2
	XB-ART-48386	24440151	Tanaka, K., Kato, A., Angelocci, C., Watanabe, M., and Kato, Y. (2014). A potential molecular pathogenesis of cardiac/laterality defects in Oculo-Facio-Cardio-Dental syndrome. Dev Biol 387(1), 28-36. doi: 10.1016/j.ydbio.2014.01.003.	2
	XB-ART-51028	26196063	Zhu, X., Dai, F.R., Wang, J., Zhang, Y., Tan, Z.P., and Zhang, Y. (2015). Novel BCOR mutation in a boy with Lenz microphthalmia/oculo-facio-cardio-dental (OFCD) syndrome. Gene 571(1), 142-144. doi: 10.1016/j.gene.2015.07.061.	2
	XB-ART-51896	26910255	Duncan, A.R., and Khokha, M.K. (2016). Xenopus as a model organism for birth defects-Congenital heart disease and heterotaxy. Semin Cell Dev Biol 51, 73-79. doi: 10.1016/j.semcdb.2016.02.022.	2
	XB-ART-861	16406325	Lunardi, A., Cremisi, F., and Dente, L. (2006). Dystroglycan is required for proper retinal layering. Dev Biol 290(2), 411-420. doi: 10.1016/j.ydbio.2005.11.044.	2
migraine	XB-ART-49629	25366493	Enyedi, P., and Czirjak, G. (2015). Properties, regulation, pharmacology, and functions of the K(2)p channel, TRESK. Pflugers Arch 467(5), 945-958. doi: 10.1007/s00424-014-1634-8.	1
migraine with aura	XB-ART-34626	15843000	Koenderink, J.B., Zifarelli, G., Qiu, L.Y., Schwarz, W., De Pont, J.J., Bamberg, E., et al. (2005). Na,K-ATPase mutations in familial hemiplegic migraine lead to functional inactivation. Biochim Biophys Acta 1669(1), 61-68. doi: 10.1016/j.bbamem.2005.01.003.	1
mitochondrial metabolism disease	XB-ART-1057	16304597	Chen, X.J., and Butow, R.A. (2005). The organization and inheritance of the mitochondrial genome. Nat Rev Genet 6(11), 815-825. doi: 10.1038/nrg1708.	1
mitochondrial myopathy	XB-ART-15075	9547220	Patel, A.J., Lauritzen, I., Lazdunski, M., and Honore, E. (1998). Disruption of mitochondrial respiration inhibits volume-regulated anion channels and provokes neuronal cell swelling. J Neurosci 18(9), 3117-3123.	1
multiple myeloma	XB-ART-40836	19808676	Li, Y., Trojer, P., Xu, C.F., Cheung, P., Kuo, A., Drury, W.J., 3rd, et al. (2009). The target of the NSD family of histone lysine methyltransferases depends on the nature of the substrate. J Biol Chem 284(49), 34283-34295. doi: 10.1074/jbc.M109.034462.	3
multiple sclerosis	XB-ART-2970	15389874	Heikkila, J.J. (2004). Regulation and function of small heat shock protein genes during amphibian development. J Cell Biochem 93(4), 672-680. doi: 10.1002/jcb.20237.	1
	XB-ART-45943	22973012	Kaya, F., Mannioui, A., Chesneau, A., Sekizar, S., Maillard, E., Ballagny, C., et al. (2012). Live imaging of targeted cell ablation in Xenopus: a new model to study demyelination and repair. J Neurosci 32(37), 12885-12895. doi: 10.1523/jneurosci.2252-12.2012.	1
	XB-ART-54061	28752787	Mannioui, A., Vauzanges, Q., Fini, J.B., Henriet, E., Sekizar, S., Azoyan, L., et al. (2017). The Xenopus tadpole: An in vivo model to screen drugs favoring remyelination. Mult Scler, 1352458517721355. doi: 10.1177/1352458517721355.	1
muscular dystrophy	XB-ART-19775	7738201	Mounsey, J.P., Xu, P., John, J.E., 3rd, Horne, L.T., Gilbert, J., Roses, A.D., et al. (1995). Modulation of skeletal muscle sodium channels by human myotonin protein kinase. J Clin Invest 95(5), 2379-2384. doi: 10.1172/jci117931.	1
musculoskeletal system disease	XB-ART-38431	18805094	Schroeder, B.C., Cheng, T., Jan, Y.N., and Jan, L.Y. (2008). Expression cloning of TMEM16A as a calcium-activated chloride channel subunit. Cell 134(6), 1019-1029. doi: 10.1016/j.cell.2008.09.003.	1
myasthenia gravis	XB-ART-50207	25746216	Yeo, H.L., Lim, J.Y., Fukami, Y., Yuki, N., and Lee, C.W. (2015). Using Xenopus tissue cultures for the study of myasthenia gravis pathogenesis. Dev Biol 408(2), 244-251. doi: 10.1016/j.ydbio.2015.02.017.	3
myopathy	XB-ART-2970	15389874	Heikkila, J.J. (2004). Regulation and function of small heat shock protein genes during amphibian development. J Cell Biochem 93(4), 672-680. doi: 10.1002/jcb.20237.	1
	XB-ART-39737	19450502	Schape, J., Prausse, S., Radmacher, M., and Stick, R. (2009). Influence of lamin A on the mechanical properties of amphibian oocyte nuclei measured by atomic force microscopy. Biophys J 96(10), 4319-4325. doi: 10.1016/j.bpj.2009.02.048.	1
myopia	XB-ART-38762	18984654	Chebib, M., Hinton, T., Schmid, K.L., Brinkworth, D., Qian, H., Matos, S., et al. (2009). Novel, potent, and selective GABAC antagonists inhibit myopia development and facilitate learning and memory. J Pharmacol Exp Ther 328(2), 448-457. doi: 10.1124/jpet.108.146464.	2
myotonia congenita	XB-ART-13449	10051520	Saviane, C., Conti, F., and Pusch, M. (1999). The muscle chloride channel ClC-1 has a double-barreled appearance that is differentially affected in dominant and recessive myotonia. J Gen Physiol 113(3), 457-468.	1
	XB-ART-13457	10050002	Pusch, M., Jordt, S.E., Stein, V., and Jentsch, T.J. (1999). Chloride dependence of hyperpolarization-activated chloride channel gates. J Physiol 515 ( Pt 2), 341-353.	1
	XB-ART-16103	9252364	Schmidt-Rose, T., and Jentsch, T.J. (1997). Reconstitution of functional voltage-gated chloride channels from complementary fragments of CLC-1. J Biol Chem 272(33), 20515-20521.	1
	XB-ART-17651	8855341	Beck, C.L., Fahlke, C., and George, A.L., Jr. (1996). Molecular basis for decreased muscle chloride conductance in the myotonic goat. Proc Natl Acad Sci U S A 93(20), 11248-11252.	1
	XB-ART-45620	22790975	Richman, D.P., Yu, Y., Lee, T.T., Tseng, P.Y., Yu, W.P., Maselli, R.A., et al. (2012). Dominantly inherited myotonia congenita resulting from a mutation that increases open probability of the muscle chloride channel CLC-1. Neuromolecular Med 14(4), 328-337. doi: 10.1007/s12017-012-8190-1.	1
	XB-ART-51459	26510092	Vindas-Smith, R., Fiore, M., Vasquez, M., Cuenca, P., Del Valle, G., Lagostena, L., et al. (2016). Identification and Functional Characterization of CLCN1 Mutations Found in Nondystrophic Myotonia Patients. Hum Mutat 37(1), 74-83. doi: 10.1002/humu.22916.	1
myotonic dystrophy type 2	XB-ART-20188	7789994	Wang, Y.H., and Griffith, J. (1995). Expanded CTG triplet blocks from the myotonic dystrophy gene create the strongest known natural nucleosome positioning elements. Genomics 25(2), 570-573.	1
	XB-ART-43375	20960530	Calcaterra, N.B., Armas, P., Weiner, A.M., and Borgognone, M. (2010). CNBP: a multifunctional nucleic acid chaperone involved in cell death and proliferation control. IUBMB Life 62(10), 707-714. doi: 10.1002/iub.379.	1
Nager acrofacial dysostosis	XB-ART-51882	26874011	Devotta, A., Juraver-Geslin, H., Gonzalez, J.A., Hong, C.S., and Saint-Jeannet, J.P. (2016). Sf3b4-depleted Xenopus embryos: A model to study the pathogenesis of craniofacial defects in Nager syndrome. Dev Biol 415(2), 371-382. doi: 10.1016/j.ydbio.2016.02.010.	1
	XB-ART-53080	28255527	Dubey, A., and Saint-Jeannet, J.P. (2017). Modeling human craniofacial disorders in Xenopus. Curr Pathobiol Rep 5(1), 79-92. doi: 10.1007/s40139-017-0128-8.	1
	XB-ART-53697	28514120	Chen, J., Jacox, L.A., Saldanha, F., and Sive, H. (2017). Mouth development. Wiley Interdiscip Rev Dev Biol 6(5). doi: 10.1002/wdev.275.	1
neonatal diabetes mellitus	XB-ART-34528	16613899	Proks, P., Arnold, A.L., Bruining, J., Girard, C., Flanagan, S.E., Larkin, B., et al. (2006). A heterozygous activating mutation in the sulphonylurea receptor SUR1 (ABCC8) causes neonatal diabetes. Hum Mol Genet 15(11), 1793-1800. doi: 10.1093/hmg/ddl101.	1
	XB-ART-52012	27033559	Babiker, T., Vedovato, N., Patel, K., Thomas, N., Finn, R., Mannikko, R., et al. (2016). Successful transfer to sulfonylureas in KCNJ11 neonatal diabetes is determined by the mutation and duration of diabetes. Diabetologia 59(6), 1162-1166. doi: 10.1007/s00125-016-3921-8.	1
nephrogenic diabetes insipidus	XB-ART-18798	8772426	Verkman, A.S., van Hoek, A.N., Ma, T., Frigeri, A., Skach, W.R., Mitra, A., et al. (1996). Water transport across mammalian cell membranes. Am J Physiol 270(1 Pt 1), C12-30. doi: 10.1152/ajpcell.1996.270.1.C12.	1
	XB-ART-3287	15253895	Buck, T.M., Eledge, J., and Skach, W.R. (2004). Evidence for stabilization of aquaporin-2 folding mutants by N-linked glycosylation in endoplasmic reticulum. Am J Physiol Cell Physiol 287(5), C1292-1299. doi: 10.1152/ajpcell.00561.2003.	1
	XB-ART-39015	18653713	Suga, H., Nagasaki, H., Kondo, T.A., Okajima, Y., Suzuki, C., Ozaki, N., et al. (2008). Novel treatment for lithium-induced nephrogenic diabetes insipidus rat model using the Sendai-virus vector carrying aquaporin 2 gene. Endocrinology 149(11), 5803-5810. doi: 10.1210/en.2007-1806.	1
	XB-ART-52439	27641679	El Tarazi, A., Lussier, Y., Da Cal, S., Bissonnette, P., and Bichet, D.G. (2016). Functional Recovery of AQP2 Recessive Mutations Through Hetero-Oligomerization with Wild-Type Counterpart. Sci Rep 6, 33298. doi: 10.1038/srep33298.	1
	XB-ART-7050	12050236	Lin, S.H., Bichet, D.G., Sasaki, S., Kuwahara, M., Arthus, M.F., Lonergan, M., et al. (2002). Two novel aquaporin-2 mutations responsible for congenital nephrogenic diabetes insipidus in Chinese families. J Clin Endocrinol Metab 87(6), 2694-2700. doi: 10.1210/jcem.87.6.8617.	1
nephrolithiasis	XB-ART-37064	18174209	Clark, J.S., Vandorpe, D.H., Chernova, M.N., Heneghan, J.F., Stewart, A.K., and Alper, S.L. (2008). Species differences in Cl- affinity and in electrogenicity of SLC26A6-mediated oxalate/Cl- exchange correlate with the distinct human and mouse susceptibilities to nephrolithiasis. J Physiol 586(5), 1291-1306. doi: 10.1113/jphysiol.2007.143222.	1
	XB-ART-41253	20219950	Heneghan, J.F., Akhavein, A., Salas, M.J., Shmukler, B.E., Karniski, L.P., Vandorpe, D.H., et al. (2010). Regulated transport of sulfate and oxalate by SLC26A2/DTDST. Am J Physiol Cell Physiol 298(6), C1363-1375. doi: 10.1152/ajpcell.00004.2010.	1
	XB-ART-4272	14672348	Virkki, L.V., Forster, I.C., Hernando, N., Biber, J., and Murer, H. (2003). Functional characterization of two naturally occurring mutations in the human sodium-phosphate cotransporter type IIa. J Bone Miner Res 18(12), 2135-2141. doi: 10.1359/jbmr.2003.18.12.2135.	1
	XB-ART-53961	28847730	Wang, L., Holmes, R.P., and Peng, J.B. (2017). The L530R variation associated with recurrent kidney stones impairs the structure and function of TRPV5. Biochem Biophys Res Commun 492(3), 362-367. doi: 10.1016/j.bbrc.2017.08.102.	1
nephronophthisis	XB-ART-47285	23793029	Hoff, S., Halbritter, J., Epting, D., Frank, V., Nguyen, T.M., van Reeuwijk, J., et al. (2013). ANKS6 is a central component of a nephronophthisis module linking NEK8 to INVS and NPHP3. Nat Genet 45(8), 951-956. doi: 10.1038/ng.2681.	1
nephronophthisis 2	XB-ART-1988	15852005	Simons, M., Gloy, J., Ganner, A., Bullerkotte, A., Bashkurov, M., Kronig, C., et al. (2005). Inversin, the gene product mutated in nephronophthisis type II, functions as a molecular switch between Wnt signaling pathways. Nat Genet 37(5), 537-543. doi: 10.1038/ng1552.	1
	XB-ART-42213	21059920	Lienkamp, S., Ganner, A., Boehlke, C., Schmidt, T., Arnold, S.J., Schafer, T., et al. (2010). Inversin relays Frizzled-8 signals to promote proximal pronephros development. Proc Natl Acad Sci U S A 107(47), 20388-20393. doi: 10.1073/pnas.1013070107.	1
neural tube defect	XB-ART-3572	15136147	Inoue, T., Hatayama, M., Tohmonda, T., Itohara, S., Aruga, J., and Mikoshiba, K. (2004). Mouse Zic5 deficiency results in neural tube defects and hypoplasia of cephalic neural crest derivatives. Dev Biol 270(1), 146-162. doi: 10.1016/j.ydbio.2004.02.017.	1
	XB-ART-38287	18723859	Schafer, T., Putz, M., Lienkamp, S., Ganner, A., Bergbreiter, A., Ramachandran, H., et al. (2008). Genetic and physical interaction between the NPHP5 and NPHP6 gene products. Hum Mol Genet 17(23), 3655-3662. doi: 10.1093/hmg/ddn260.	1
	XB-ART-4893	12900569	Herman, G.E., and El-Hodiri, H.M. (2002). The role of ZIC3 in vertebrate development. Cytogenet Genome Res 99(1-4), 229-235. doi: 10.1159/000071598.	1
	XB-ART-51365	26434722	Sullivan-Brown, J.L., Tandon, P., Bird, K.E., Dickinson, D.J., Tintori, S.C., Heppert, J.K., et al. (2016). Identifying Regulators of Morphogenesis Common to Vertebrate Neural Tube Closure and Caenorhabditis elegans Gastrulation. Genetics 202(1), 123-139. doi: 10.1534/genetics.115.183137.	1
	XB-ART-54132	28432198	Toriyama, M., Toriyama, M., Wallingford, J.B., and Finnell, R.H. (2017). Folate-dependent methylation of septins governs ciliogenesis during neural tube closure. Faseb j 31(8), 3622-3635. doi: 10.1096/fj.201700092R.	1
neuroblastoma	XB-ART-48004	23917377	Wei, X., Sun, H., Yan, H., Zhang, C., Zhang, S., Liu, X., et al. (2013). ZC88, a novel 4-amino piperidine analog, inhibits the growth of neuroblastoma cells through blocking hERG potassium channel. Cancer Biol Ther 14(5), 450-457. doi: 10.4161/cbt.24423.	2
	XB-ART-50246	25786414	Wylie, L.A., Hardwick, L.J., Papkovskaia, T.D., Thiele, C.J., and Philpott, A. (2015). Ascl1 phospho-status regulates neuronal differentiation in a Xenopus developmental model of neuroblastoma. Dis Model Mech 8(5), 429-441. doi: 10.1242/dmm.018630.	2
neurodegeneration with brain iron accumulation	XB-ART-3852	15014911	Marciani, P., Trotti, D., Hediger, M.A., and Monticelli, G. (2004). Modulation of DMT1 activity by redox compounds. J Membr Biol 197(2), 91-99. doi: 10.1007/s00232-003-0644-9.	1
neurodegenerative disease	XB-ART-22829	7679115	Karp, S.J., Masu, M., Eki, T., Ozawa, K., and Nakanishi, S. (1993). Molecular cloning and chromosomal localization of the key subunit of the human N-methyl-D-aspartate receptor. J Biol Chem 268(5), 3728-3733.	1
	XB-ART-34974	17136396	Chen, H., von Hehn, C., Kaczmarek, L.K., Ment, L.R., Pober, B.R., and Hisama, F.M. (2007). Functional analysis of a novel potassium channel (KCNA1) mutation in hereditary myokymia. Neurogenetics 8(2), 131-135. doi: 10.1007/s10048-006-0071-z.	1
	XB-ART-41002	20077426	Rauschenberger, K., Scholer, K., Sass, J.O., Sauer, S., Djuric, Z., Rumig, C., et al. (2010). A non-enzymatic function of 17beta-hydroxysteroid dehydrogenase type 10 is required for mitochondrial integrity and cell survival. EMBO Mol Med 2(2), 51-62. doi: 10.1002/emmm.200900055.	1
	XB-ART-51258	26348728	Ullah, G., Demuro, A., Parker, I., and Pearson, J.E. (2015). Analyzing and Modeling the Kinetics of Amyloid Beta Pores Associated with Alzheimer's Disease Pathology. PLoS One 10(9), e0137357. doi: 10.1371/journal.pone.0137357.	1
	XB-ART-51363	26437037	de Broucker, A., Semaille, P., Cailliau, K., Martoriati, A., Comptdaer, T., Bodart, J.F., et al. (2015). Xenopus laevis as a Model to Identify Translation Impairment. J Vis Exp (103). doi: 10.3791/52724.	1
	XB-ART-5221	12771173	Umesh, A., Cohen, B.N., Ross, L.S., and Gill, S.S. (2003). Functional characterization of a glutamate/aspartate transporter from the mosquito Aedes aegypti. J Exp Biol 206(Pt 13), 2241-2255.	1
	XB-ART-5802	12562926	Grassi, F., Palma, E., Tonini, R., Amici, M., Ballivet, M., and Eusebi, F. (2003). Amyloid beta(1-42) peptide alters the gating of human and mouse alpha-bungarotoxin-sensitive nicotinic receptors. J Physiol 547(Pt 1), 147-157. doi: 10.1113/jphysiol.2002.035436.	1
	XB-ART-6220	12423251	Delobel, P., Flament, S., Hamdane, M., Mailliot, C., Sambo, A.V., Begard, S., et al. (2002). Abnormal Tau phosphorylation of the Alzheimer-type also occurs during mitosis. J Neurochem 83(2), 412-420.	1
	XB-ART-7300	11959122	Delobel, P., Flament, S., Hamdane, M., Delacourte, A., Vilain, J.P., and Buee, L. (2002). Modelling Alzheimer-specific abnormal Tau phosphorylation independently of GSK3beta and PKA kinase activities. FEBS Lett 516(1-3), 151-155.	1
	XB-ART-7959	11744158	van den Hurk, W.H., Bloemen, M., and Martens, G.J. (2001). Expression of the gene encoding the beta-amyloid precursor protein APP in Xenopus laevis. Brain Res Mol Brain Res 97(1), 13-20.	1
neurofibromatosis	XB-ART-51212	26344136	Zhu, X., Min, Z., Tan, R., and Tao, Q. (2015). NF2/Merlin is required for the axial pattern formation in the Xenopus laevis embryo. Mech Dev 138 Pt 3, 305-312. doi: 10.1016/j.mod.2015.08.008.	1
neuronal ceroid lipofuscinosis	XB-ART-4438	14609438	Wlodawer, A., Durell, S.R., Li, M., Oyama, H., Oda, K., and Dunn, B.M. (2003). A model of tripeptidyl-peptidase I (CLN2), a ubiquitous and highly conserved member of the sedolisin family of serine-carboxyl peptidases. BMC Struct Biol 3, 8. doi: 10.1186/1472-6807-3-8.	1
night blindness	XB-ART-5209	12778053	Jin, S., Cornwall, M.C., and Oprian, D.D. (2003). Opsin activation as a cause of congenital night blindness. Nat Neurosci 6(7), 731-735. doi: 10.1038/nn1070.	2
nonsyndromic deafness	XB-ART-51592	26582541	Ramirez-Gordillo, D., Powers, T.R., van Velkinburgh, J.C., Trujillo-Provencio, C., Schilkey, F., and Serrano, E.E. (2015). RNA-Seq and microarray analysis of the Xenopus inner ear transcriptome discloses orthologous OMIM((R)) genes for hereditary disorders of hearing and balance. BMC Res Notes 8, 691. doi: 10.1186/s13104-015-1485-1.	2
Norrie disease	XB-ART-45061	22448144	Xu, S., Cheng, F., Liang, J., Wu, W., and Zhang, J. (2012). Maternal xNorrin, a canonical Wnt signaling agonist and TGF-beta antagonist, controls early neuroectoderm specification in Xenopus. PLoS Biol 10(3), e1001286. doi: 10.1371/journal.pbio.1001286.	1
obesity	XB-ART-46995	23603401	Punzon, I., Latapie, V., Le Mevel, S., Hagneau, A., Jolivet, P., Palmier, K., et al. (2013). Towards a humanized PPARgamma reporter system for in vivo screening of obesogens. Mol Cell Endocrinol 374(1-2), 1-9. doi: 10.1016/j.mce.2013.04.004.	1
oculocerebrorenal syndrome	XB-ART-54371	28923975	Daste, F., Walrant, A., Holst, M.R., Gadsby, J.R., Mason, J., Lee, J.E., et al. (2017). Control of actin polymerization via the coincidence of phosphoinositides and high membrane curvature. J Cell Biol 216(11), 3745-3765. doi: 10.1083/jcb.201704061.	1
oculocutaneous albinism	XB-ART-51512	26546975	Bhattacharya, D., Marfo, C.A., Li, D., Lane, M., and Khokha, M.K. (2015). CRISPR/Cas9: An inexpensive, efficient loss of function tool to screen human disease genes in Xenopus. Dev Biol 408(2), 196-204. doi: 10.1016/j.ydbio.2015.11.003.	1
Ohtahara syndrome	XB-ART-51153	25482562	Kim, G.E., Kronengold, J., Barcia, G., Quraishi, I.H., Martin, H.C., Blair, E., et al. (2014). Human slack potassium channel mutations increase positive cooperativity between individual channels. Cell Rep 9(5), 1661-1672. doi: 10.1016/j.celrep.2014.11.015.	1
	XB-ART-54329	29196579	McTague, A., Nair, U., Malhotra, S., Meyer, E., Trump, N., Gazina, E.V., et al. (2018). Clinical and molecular characterization of KCNT1-related severe early-onset epilepsy. Neurology 90(1), e55-e66. doi: 10.1212/WNL.0000000000004762.	1
Opitz-GBBB syndrome	XB-ART-1268	16213823	Maresca, T.J., Niederstrasser, H., Weis, K., and Heald, R. (2005). Xnf7 contributes to spindle integrity through its microtubule-bundling activity. Curr Biol 15(19), 1755-1761. doi: 10.1016/j.cub.2005.08.049.	1
organic acidemia	XB-ART-41002	20077426	Rauschenberger, K., Scholer, K., Sass, J.O., Sauer, S., Djuric, Z., Rumig, C., et al. (2010). A non-enzymatic function of 17beta-hydroxysteroid dehydrogenase type 10 is required for mitochondrial integrity and cell survival. EMBO Mol Med 2(2), 51-62. doi: 10.1002/emmm.200900055.	1
orofacial cleft	XB-ART-44961	22405964	Kennedy, A.E., and Dickinson, A.J. (2012). Median facial clefts in Xenopus laevis: roles of retinoic acid signaling and homeobox genes. Dev Biol 365(1), 229-240. doi: 10.1016/j.ydbio.2012.02.033.	1
	XB-ART-50938	26144049	Wahl, S.E., Kennedy, A.E., Wyatt, B.H., Moore, A.D., Pridgen, D.E., Cherry, A.M., et al. (2015). The role of folate metabolism in orofacial development and clefting. Dev Biol 405(1), 108-122. doi: 10.1016/j.ydbio.2015.07.001.	1
	XB-ART-51800	26778163	Dickinson, A.J. (2016). Using frogs faces to dissect the mechanisms underlying human orofacial defects. Semin Cell Dev Biol 51, 54-63. doi: 10.1016/j.semcdb.2016.01.016.	1
	XB-ART-53080	28255527	Dubey, A., and Saint-Jeannet, J.P. (2017). Modeling human craniofacial disorders in Xenopus. Curr Pathobiol Rep 5(1), 79-92. doi: 10.1007/s40139-017-0128-8.	1
osteoarthritis	XB-ART-373	16683072	Janssens, N., Janicot, M., and Perera, T. (2006). The Wnt-dependent signaling pathways as target in oncology drug discovery. Invest New Drugs 24(4), 263-280. doi: 10.1007/s10637-005-5199-4.	1
	XB-ART-52081	27147711	Nalesso, G., Thomas, B.L., Sherwood, J.C., Yu, J., Addimanda, O., Eldridge, S.E., et al. (2017). WNT16 antagonises excessive canonical WNT activation and protects cartilage in osteoarthritis. Ann Rheum Dis 76(1), 218-226. doi: 10.1136/annrheumdis-2015-208577.	1
osteopetrosis	XB-ART-49880	24159188	Sartelet, A., Stauber, T., Coppieters, W., Ludwig, C.F., Fasquelle, C., Druet, T., et al. (2014). A missense mutation accelerating the gating of the lysosomal Cl-/H+-exchanger ClC-7/Ostm1 causes osteopetrosis with gingival hamartomas in cattle. Dis Model Mech 7(1), 119-128. doi: 10.1242/dmm.012500.	1
osteopoikilosis	XB-ART-47764	24252515	Reil, M., and Dabauvalle, M.C. (2013). Essential roles of LEM-domain protein MAN1 during organogenesis in Xenopus laevis and overlapping functions of emerin. Eur J Cell Biol 92(8-9), 280-294. doi: 10.1016/j.ejcb.2013.10.008.	1
osteoporosis	XB-ART-4272	14672348	Virkki, L.V., Forster, I.C., Hernando, N., Biber, J., and Murer, H. (2003). Functional characterization of two naturally occurring mutations in the human sodium-phosphate cotransporter type IIa. J Bone Miner Res 18(12), 2135-2141. doi: 10.1359/jbmr.2003.18.12.2135.	1
pain agnosia	XB-ART-50724	26005867	Chen, Y.C., Auer-Grumbach, M., Matsukawa, S., Zitzelsberger, M., Themistocleous, A.C., Strom, T.M., et al. (2015). Transcriptional regulator PRDM12 is essential for human pain perception. Nat Genet 47(7), 803-808. doi: 10.1038/ng.3308.	1
pain disorder	XB-ART-50566	25916202	Goral, R.O., Leipold, E., Nematian-Ardestani, E., and Heinemann, S.H. (2015). Heterologous expression of NaV1.9 chimeras in various cell systems. Pflugers Arch 467(12), 2423-2435. doi: 10.1007/s00424-015-1709-1.	1
	XB-ART-54058	28943291	Karim, N., Khan, I., Ahmad, N., Umar, M.N., and Gavande, N. (2017). Antidepressant, anticonvulsant and antinociceptive effects of 3'-methoxy-6-methylflavone and 3'-hydroxy-6-methylflavone may involve GABAergic mechanisms. Pharmacol Rep 69(5), 1014-1020. doi: 10.1016/j.pharep.2017.03.001.	1
pancytopenia	xb-art-3257	15262960	Leveille, F., Blom, E., Medhurst, A.L., Bier, P., Laghmani el, H., Johnson, M., et al. (2004). The Fanconi anemia gene product FANCF is a flexible adaptor protein. J Biol Chem 279(38), 39421-39430. doi: 10.1074/jbc.M407034200.	1
	xb-art-36130	17584296	Stone, S., Sobeck, A., van Kogelenberg, M., de Graaf, B., Joenje, H., Christian, J., et al. (2007). Identification, developmental expression and regulation of the Xenopus ortholog of human FANCG/XRCC9. Genes Cells 12(7), 841-851. doi: 10.1111/j.1365-2443.2007.01096.x.	1
	xb-art-40788	20043851	Landais, I., Hiddingh, S., McCarroll, M., Yang, C., Sun, A., Turker, M.S., et al. (2009). Monoketone analogs of curcumin, a new class of Fanconi anemia pathway inhibitors. Mol Cancer 8, 133. doi: 10.1186/1476-4598-8-133.	1
	xb-art-46414	22753026	Sareen, A., Chaudhury, I., Adams, N., and Sobeck, A. (2012). Fanconi anemia proteins FANCD2 and FANCI exhibit different DNA damage responses during S-phase. Nucleic Acids Res 40(17), 8425-8439. doi: 10.1093/nar/gks638.	1
	xb-art-890	16382135	Sobeck, A., Stone, S., Costanzo, V., de Graaf, B., Reuter, T., de Winter, J., et al. (2006). Fanconi anemia proteins are required to prevent accumulation of replication-associated DNA double-strand breaks. Mol Cell Biol 26(2), 425-437. doi: 10.1128/MCB.26.2.425-437.2006.	1
paraplegia	XB-ART-35069	17166836	Goytain, A., Hines, R.M., El-Husseini, A., and Quamme, G.A. (2007). NIPA1(SPG6), the basis for autosomal dominant form of hereditary spastic paraplegia, encodes a functional Mg2+ transporter. J Biol Chem 282(11), 8060-8068. doi: 10.1074/jbc.M610314200.	1
Parkinson's disease	XB-ART-49273	25073474	Camargo, S.M., Vuille-dit-Bille, R.N., Mariotta, L., Ramadan, T., Huggel, K., Singer, D., et al. (2014). The molecular mechanism of intestinal levodopa absorption and its possible implications for the treatment of Parkinson's disease. J Pharmacol Exp Ther 351(1), 114-123. doi: 10.1124/jpet.114.216317.	1
	XB-ART-54688	29566083	Stahl, K., Rahmani, S., Prydz, A., Skauli, N., MacAulay, N., Mylonakou, M.N., et al. (2018). Targeted deletion of the aquaglyceroporin AQP9 is protective in a mouse model of Parkinson's disease. PLoS One 13(3), e0194896. doi: 10.1371/journal.pone.0194896.	1
Pelger-Huet anomaly	XB-ART-6016	12490158	Dreger, C.K., Konig, A.R., Spring, H., Lichter, P., and Herrmann, H. (2002). Investigation of nuclear architecture with a domain-presenting expression system. J Struct Biol 140(1-3), 100-115.	1
Pendred Syndrome	XB-ART-39645	19420365	Bockenhauer, D., Feather, S., Stanescu, H.C., Bandulik, S., Zdebik, A.A., Reichold, M., et al. (2009). Epilepsy, ataxia, sensorineural deafness, tubulopathy, and KCNJ10 mutations. N Engl J Med 360(19), 1960-1970. doi: 10.1056/NEJMoa0810276.	1
	XB-ART-39897	19426954	Yang, T., Gurrola, J.G., 2nd, Wu, H., Chiu, S.M., Wangemann, P., Snyder, P.M., et al. (2009). Mutations of KCNJ10 together with mutations of SLC26A4 cause digenic nonsyndromic hearing loss associated with enlarged vestibular aqueduct syndrome. Am J Hum Genet 84(5), 651-657. doi: 10.1016/j.ajhg.2009.04.014.	1
	XB-ART-460	16606687	Shcheynikov, N., Wang, Y., Park, M., Ko, S.B., Dorwart, M., Naruse, S., et al. (2006). Coupling modes and stoichiometry of Cl-/HCO3- exchange by slc26a3 and slc26a6. J Gen Physiol 127(5), 511-524. doi: 10.1085/jgp.200509392.	1
	XB-ART-46372	22544634	Chen, A.P., Chang, M.H., and Romero, M.F. (2012). Functional analysis of nonsynonymous single nucleotide polymorphisms in human SLC26A9. Hum Mutat 33(8), 1275-1284. doi: 10.1002/humu.22107.	1
permanent neonatal diabetes mellitus	XB-ART-51783	26806634	Kofent, J., and Spagnoli, F.M. (2016). Xenopus as a model system for studying pancreatic development and diabetes. Semin Cell Dev Biol 51, 106-116. doi: 10.1016/j.semcdb.2016.01.005.	1
phosphorus metabolism disease	XB-ART-24689	1649826	Nakagawa, N., Arab, N., and Ghishan, F.K. (1991). Characterization of the defect in the Na(+)-phosphate transporter in vitamin D-resistant hypophosphatemic mice. J Biol Chem 266(21), 13616-13620.	1
pigmentation disease	XB-ART-22027	8291895	Hauptman, O., Albert, D.M., Plowman, M.C., Hopfer, S.M., and Sunderman, F.W., Jr. (1993). Ocular malformations of Xenopus laevis exposed to nickel during embryogenesis. Ann Clin Lab Sci 23(6), 397-406.	1
Plasmodium falciparum malaria	XB-ART-5181	12792024	Joet, T., Eckstein-Ludwig, U., Morin, C., and Krishna, S. (2003). Validation of the hexose transporter of Plasmodium falciparum as a novel drug target. Proc Natl Acad Sci U S A 100(13), 7476-7479. doi: 10.1073/pnas.1330865100.	1
	XB-ART-6521	12238947	Joet, T., Holterman, L., Stedman, T.T., Kocken, C.H., Van Der Wel, A., Thomas, A.W., et al. (2002). Comparative characterization of hexose transporters of Plasmodium knowlesi, Plasmodium yoelii and Toxoplasma gondii highlights functional differences within the apicomplexan family. Biochem J 368(Pt 3), 923-929. doi: 10.1042/bj20021189.	1
pneumonia	XB-ART-50331	25848696	Walentek, P., Beyer, T., Hagenlocher, C., Muller, C., Feistel, K., Schweickert, A., et al. (2015). ATP4a is required for development and function of the Xenopus mucociliary epidermis - a potential model to study proton pump inhibitor-associated pneumonia. Dev Biol 408(2), 292-304. doi: 10.1016/j.ydbio.2015.03.013.	1
polycystic kidney disease 1	XB-ART-42033	20833712	Duning, K., Rosenbusch, D., Schluter, M.A., Tian, Y., Kunzelmann, K., Meyer, N., et al. (2010). Polycystin-2 activity is controlled by transcriptional coactivator with PDZ binding motif and PALS1-associated tight junction protein. J Biol Chem 285(44), 33584-33588. doi: 10.1074/jbc.C110.146381.	2
	XB-ART-46633	23390129	Streets, A.J., Wessely, O., Peters, D.J., and Ong, A.C. (2013). Hyperphosphorylation of polycystin-2 at a critical residue in disease reveals an essential role for polycystin-1-regulated dephosphorylation. Hum Mol Genet 22(10), 1924-1939. doi: 10.1093/hmg/ddt031.	2
polycystic kidney disease 2	XB-ART-42033	20833712	Duning, K., Rosenbusch, D., Schluter, M.A., Tian, Y., Kunzelmann, K., Meyer, N., et al. (2010). Polycystin-2 activity is controlled by transcriptional coactivator with PDZ binding motif and PALS1-associated tight junction protein. J Biol Chem 285(44), 33584-33588. doi: 10.1074/jbc.C110.146381.	2
	XB-ART-46633	23390129	Streets, A.J., Wessely, O., Peters, D.J., and Ong, A.C. (2013). Hyperphosphorylation of polycystin-2 at a critical residue in disease reveals an essential role for polycystin-1-regulated dephosphorylation. Hum Mol Genet 22(10), 1924-1939. doi: 10.1093/hmg/ddt031.	2
polycystic ovary syndrome	XB-ART-50648	25931457	Hua, J., Xu, B., Yang, Y., Ban, R., Iqbal, F., Cooke, H.J., et al. (2015). Follicle Online: an integrated database of follicle assembly, development and ovulation. Database (Oxford) 2015, bav036. doi: 10.1093/database/bav036.	0
polydactyly	XB-ART-54158	28679688	Johnston, J.J., Lee, C., Wentzensen, I.M., Parisi, M.A., Crenshaw, M.M., Sapp, J.C., et al. (2017). Compound heterozygous alterations in intraflagellar transport protein CLUAP1 in a child with a novel Joubert and oral-facial-digital overlap syndrome. Cold Spring Harb Mol Case Stud 3(4). doi: 10.1101/mcs.a001321.	1
premature ovarian failure	XB-ART-50648	25931457	Hua, J., Xu, B., Yang, Y., Ban, R., Iqbal, F., Cooke, H.J., et al. (2015). Follicle Online: an integrated database of follicle assembly, development and ovulation. Database (Oxford) 2015, bav036. doi: 10.1093/database/bav036.	2
primary ciliary dyskinesia	XB-ART-43032	21183475	Dubaissi, E., and Papalopulu, N. (2011). Embryonic frog epidermis: a model for the study of cell-cell interactions in the development of mucociliary disease. Dis Model Mech 4(2), 179-192. doi: 10.1242/dmm.006494.	1
	XB-ART-46277	23171430	del Viso, F., Bhattacharya, D., Kong, Y., Gilchrist, M.J., and Khokha, M.K. (2012). Exon capture and bulk segregant analysis: rapid discovery of causative mutations using high-throughput sequencing. BMC Genomics 13, 649. doi: 10.1186/1471-2164-13-649.	1
	XB-ART-47779	24226769	Boskovski, M.T., Yuan, S., Pedersen, N.B., Goth, C.K., Makova, S., Clausen, H., et al. (2013). The heterotaxy gene GALNT11 glycosylates Notch to orchestrate cilia type and laterality. Nature 504(7480), 456-459. doi: 10.1038/nature12723.	1
	XB-ART-48908	24747639	Wallmeier, J., Al-Mutairi, D.A., Chen, C.T., Loges, N.T., Pennekamp, P., Menchen, T., et al. (2014). Mutations in CCNO result in congenital mucociliary clearance disorder with reduced generation of multiple motile cilia. Nat Genet 46(6), 646-651. doi: 10.1038/ng.2961.	1
	XB-ART-51512	26546975	Bhattacharya, D., Marfo, C.A., Li, D., Lane, M., and Khokha, M.K. (2015). CRISPR/Cas9: An inexpensive, efficient loss of function tool to screen human disease genes in Xenopus. Dev Biol 408(2), 196-204. doi: 10.1016/j.ydbio.2015.11.003.	1
	XB-ART-53774	28621423	Gur, M., Cohen, E.B., Genin, O., Fainsod, A., Perles, Z., and Cinnamon, Y. (2017). Roles of the cilium-associated gene CCDC11 in left-right patterning and in laterality disorders in humans. Int J Dev Biol 61(3-4-5), 267-276. doi: 10.1387/ijdb.160442yc.	1
primary ciliary dyskinesia 15	XB-ART-51512	26546975	Bhattacharya, D., Marfo, C.A., Li, D., Lane, M., and Khokha, M.K. (2015). CRISPR/Cas9: An inexpensive, efficient loss of function tool to screen human disease genes in Xenopus. Dev Biol 408(2), 196-204. doi: 10.1016/j.ydbio.2015.11.003.	1
primary ciliary dyskinesia 22	XB-ART-48030	23891469	Zariwala, M.A., Gee, H.Y., Kurkowiak, M., Al-Mutairi, D.A., Leigh, M.W., Hurd, T.W., et al. (2013). ZMYND10 is mutated in primary ciliary dyskinesia and interacts with LRRC6. Am J Hum Genet 93(2), 336-345. doi: 10.1016/j.ajhg.2013.06.007.	1
primary hyperaldosteronism	XB-ART-54250	29030398	Meyer, D.J., Gatto, C., and Artigas, P. (2017). On the effect of hyperaldosteronism-inducing mutations in Na/K pumps. J Gen Physiol 149(11), 1009-1028. doi: 10.1085/jgp.201711827.	1
primary hypomagnesemia	XB-ART-3962	14976260	Chubanov, V., Waldegger, S., Mederos y Schnitzler, M., Vitzthum, H., Sassen, M.C., Seyberth, H.W., et al. (2004). Disruption of TRPM6/TRPM7 complex formation by a mutation in the TRPM6 gene causes hypomagnesemia with secondary hypocalcemia. Proc Natl Acad Sci U S A 101(9), 2894-2899. doi: 10.1073/pnas.0305252101.	1
progeria	XB-ART-42278	20833363	Hernandez, L., Roux, K.J., Wong, E.S., Mounkes, L.C., Mutalif, R., Navasankari, R., et al. (2010). Functional coupling between the extracellular matrix and nuclear lamina by Wnt signaling in progeria. Dev Cell 19(3), 413-425. doi: 10.1016/j.devcel.2010.08.013.	1
	XB-ART-46554	21941106	Kaufmann, A., Heinemann, F., Radmacher, M., and Stick, R. (2011). Amphibian oocyte nuclei expressing lamin A with the progeria mutation E145K exhibit an increased elastic modulus. Nucleus 2(4), 310-319. doi: 10.4161/nucl.2.4.16119.	1
progressive myoclonus epilepsy	XB-ART-50162	25401298	Muona, M., Berkovic, S.F., Dibbens, L.M., Oliver, K.L., Maljevic, S., Bayly, M.A., et al. (2015). A recurrent de novo mutation in KCNC1 causes progressive myoclonus epilepsy. Nat Genet 47(1), 39-46. doi: 10.1038/ng.3144.	1
proliferative vitreoretinopathy	XB-ART-48037	23880527	Chiba, C. (2014). The retinal pigment epithelium: an important player of retinal disorders and regeneration. Exp Eye Res 123, 107-114. doi: 10.1016/j.exer.2013.07.009.	2
prostate cancer	XB-ART-23620	1324422	Tsutsumi, M., Zhou, W., Millar, R.P., Mellon, P.L., Roberts, J.L., Flanagan, C.A., et al. (1992). Cloning and functional expression of a mouse gonadotropin-releasing hormone receptor. Mol Endocrinol 6(7), 1163-1169. doi: 10.1210/mend.6.7.1324422.	2
	XB-ART-39612	19383605	Grandy, D., Shan, J., Zhang, X., Rao, S., Akunuru, S., Li, H., et al. (2009). Discovery and characterization of a small molecule inhibitor of the PDZ domain of dishevelled. J Biol Chem 284(24), 16256-16263. doi: 10.1074/jbc.M109.009647.	2
	XB-ART-45452	22719994	Li, L., Wen, L., Gong, Y., Mei, G., Liu, J., Chen, Y., et al. (2012). Xenopus as a model system for the study of GOLPH2/GP73 function: Xenopus GOLPH2 is required for pronephros development. PLoS One 7(6), e38939. doi: 10.1371/journal.pone.0038939.	2
proximal symphalangism	XB-ART-8378	11562478	Marcelino, J., Sciortino, C.M., Romero, M.F., Ulatowski, L.M., Ballock, R.T., Economides, A.N., et al. (2001). Human disease-causing NOG missense mutations: effects on noggin secretion, dimer formation, and bone morphogenetic protein binding. Proc Natl Acad Sci U S A 98(20), 11353-11358. doi: 10.1073/pnas.201367598.	1
pseudo-Hurler polydystrophy	XB-ART-588	16531414	Cruciat, C.M., Hassler, C., and Niehrs, C. (2006). The MRH protein Erlectin is a member of the endoplasmic reticulum synexpression group and functions in N-glycan recognition. J Biol Chem 281(18), 12986-12993. doi: 10.1074/jbc.M511872200.	1
pseudohypoaldosteronism	XB-ART-1124	16275911	Kahle, K.T., Rinehart, J., de Los Heros, P., Louvi, A., Meade, P., Vazquez, N., et al. (2005). WNK3 modulates transport of Cl- in and out of cells: implications for control of cell volume and neuronal excitability. Proc Natl Acad Sci U S A 102(46), 16783-16788. doi: 10.1073/pnas.0508307102.	1
	XB-ART-37287	18280177	Kahle, K.T., Rinehart, J., Giebisch, G., Gamba, G., Hebert, S.C., and Lifton, R.P. (2008). A novel protein kinase signaling pathway essential for blood pressure regulation in humans. Trends Endocrinol Metab 19(3), 91-95. doi: 10.1016/j.tem.2008.01.001.	1
	XB-ART-3995	14769928	Kahle, K.T., Gimenez, I., Hassan, H., Wilson, F.H., Wong, R.D., Forbush, B., et al. (2004). WNK4 regulates apical and basolateral Cl- flux in extrarenal epithelia. Proc Natl Acad Sci U S A 101(7), 2064-2069. doi: 10.1073/pnas.0308434100.	1
	XB-ART-50451	25250572	McCormick, J.A., Yang, C.L., Zhang, C., Davidge, B., Blankenstein, K.I., Terker, A.S., et al. (2014). Hyperkalemic hypertension-associated cullin 3 promotes WNK signaling by degrading KLHL3. J Clin Invest 124(11), 4723-4736. doi: 10.1172/jci76126.	1
	XB-ART-51535	25542968	Bazua-Valenti, S., Chavez-Canales, M., Rojas-Vega, L., Gonzalez-Rodriguez, X., Vazquez, N., Rodriguez-Gama, A., et al. (2015). The Effect of WNK4 on the Na+-Cl- Cotransporter Is Modulated by Intracellular Chloride. J Am Soc Nephrol 26(8), 1781-1786. doi: 10.1681/ASN.2014050470.	1
	XB-ART-52264	27378813	Murthy, M., Kurz, T., and O'Shaughnessy, K.M. (2016). ROMK expression remains unaltered in a mouse model of familial hyperkalemic hypertension caused by the CUL3Delta403-459 mutation. Physiol Rep 4(13). doi: 10.14814/phy2.12850.	1
	XB-ART-82	16887815	Pacheco-Alvarez, D., Cristobal, P.S., Meade, P., Moreno, E., Vazquez, N., Munoz, E., et al. (2006). The Na+:Cl- cotransporter is activated and phosphorylated at the amino-terminal domain upon intracellular chloride depletion. J Biol Chem 281(39), 28755-28763. doi: 10.1074/jbc.M603773200.	1
pseudomyxoma peritonei	XB-ART-43032	21183475	Dubaissi, E., and Papalopulu, N. (2011). Embryonic frog epidermis: a model for the study of cell-cell interactions in the development of mucociliary disease. Dis Model Mech 4(2), 179-192. doi: 10.1242/dmm.006494.	2
psoriasis	XB-ART-39785	19478043	Kalin, R.E., Banziger-Tobler, N.E., Detmar, M., and Brandli, A.W. (2009). An in vivo chemical library screen in Xenopus tadpoles reveals novel pathways involved in angiogenesis and lymphangiogenesis. Blood 114(5), 1110-1122. doi: 10.1182/blood-2009-03-211771.	1
pulmonary edema	XB-ART-45358	22668601	Krumm, P., Giraldez, T., Alvarez de la Rosa, D., Clauss, W.G., Fronius, M., and Althaus, M. (2012). Thiol-reactive compounds from garlic inhibit the epithelial sodium channel (ENaC). Bioorg Med Chem 20(13), 3979-3984. doi: 10.1016/j.bmc.2012.05.021.	1
renal agenesis	XB-ART-51512	26546975	Bhattacharya, D., Marfo, C.A., Li, D., Lane, M., and Khokha, M.K. (2015). CRISPR/Cas9: An inexpensive, efficient loss of function tool to screen human disease genes in Xenopus. Dev Biol 408(2), 196-204. doi: 10.1016/j.ydbio.2015.11.003.	1
renal tubular acidosis	XB-ART-2902	15471865	Dinour, D., Chang, M.H., Satoh, J., Smith, B.L., Angle, N., Knecht, A., et al. (2004). A novel missense mutation in the sodium bicarbonate cotransporter (NBCe1/SLC4A4) causes proximal tubular acidosis and glaucoma through ion transport defects. J Biol Chem 279(50), 52238-52246. doi: 10.1074/jbc.M406591200.	1
	XB-ART-4077	14734552	Rungroj, N., Devonald, M.A., Cuthbert, A.W., Reimann, F., Akkarapatumwong, V., Yenchitsomanus, P.T., et al. (2004). A novel missense mutation in AE1 causing autosomal dominant distal renal tubular acidosis retains normal transport function but is mistargeted in polarized epithelial cells. J Biol Chem 279(14), 13833-13838. doi: 10.1074/jbc.M400188200.	1
	XB-ART-52257	27338124	Myers, E.J., Yuan, L., Felmlee, M.A., Lin, Y.Y., Jiang, Y., Pei, Y., et al. (2016). A novel mutant Na(+) /HCO3(-) cotransporter NBCe1 in a case of compound-heterozygous inheritance of proximal renal tubular acidosis. J Physiol 594(21), 6267-6286. doi: 10.1113/jp272252.	1
renal tubular transport disease	XB-ART-35036	17186942	Gimenez, I., and Forbush, B. (2007). The residues determining differences in ion affinities among the alternative splice variants F, A, and B of the mammalian renal Na-K-Cl cotransporter (NKCC2). J Biol Chem 282(9), 6540-6547. doi: 10.1074/jbc.M610780200.	1
	XB-ART-7076	12039972	De Jong, J.C., Van Der Vliet, W.A., Van Den Heuvel, L.P., Willems, P.H., Knoers, N.V., and Bindels, R.J. (2002). Functional expression of mutations in the human NaCl cotransporter: evidence for impaired routing mechanisms in Gitelman's syndrome. J Am Soc Nephrol 13(6), 1442-1448.	1
Renpenning syndrome	XB-ART-49433	25209246	Iwasaki, Y., and Thomsen, G.H. (2014). The splicing factor PQBP1 regulates mesodermal and neural development through FGF signaling. Development 141(19), 3740-3751. doi: 10.1242/dev.106658.	1
retinal degeneration	XB-ART-21964	8111381	Shoulders, C.C., Brett, D.J., Bayliss, J.D., Narcisi, T.M., Jarmuz, A., Grantham, T.T., et al. (1993). Abetalipoproteinemia is caused by defects of the gene encoding the 97 kDa subunit of a microsomal triglyceride transfer protein. Hum Mol Genet 2(12), 2109-2116.	2
retinal disease	XB-ART-3290	15252042	Ritter, L.M., Boesze-Battaglia, K., Tam, B.M., Moritz, O.L., Khattree, N., Chen, S.C., et al. (2004). Uncoupling of photoreceptor peripherin/rds fusogenic activity from biosynthesis, subunit assembly, and targeting: a potential mechanism for pathogenic effects. J Biol Chem 279(38), 39958-39967. doi: 10.1074/jbc.M403943200.	2
	XB-ART-5209	12778053	Jin, S., Cornwall, M.C., and Oprian, D.D. (2003). Opsin activation as a cause of congenital night blindness. Nat Neurosci 6(7), 731-735. doi: 10.1038/nn1070.	2
retinitis pigmentosa	XB-ART-36377	17715341	Tam, B.M., and Moritz, O.L. (2007). Dark rearing rescues P23H rhodopsin-induced retinal degeneration in a transgenic Xenopus laevis model of retinitis pigmentosa: a chromophore-dependent mechanism characterized by production of N-terminally truncated mutant rhodopsin. J Neurosci 27(34), 9043-9053. doi: 10.1523/jneurosci.2245-07.2007.	2
	XB-ART-37315	18291367	Zhang, R., Oglesby, E., and Marsh-Armstrong, N. (2008). Xenopus laevis P23H rhodopsin transgene causes rod photoreceptor degeneration that is more severe in the ventral retina and is modulated by light. Exp Eye Res 86(4), 612-621. doi: 10.1016/j.exer.2008.01.005.	2
	XB-ART-47989	23940033	Hollingsworth, T.J., and Gross, A.K. (2013). The severe autosomal dominant retinitis pigmentosa rhodopsin mutant Ter349Glu mislocalizes and induces rapid rod cell death. J Biol Chem 288(40), 29047-29055. doi: 10.1074/jbc.M113.495184.	2
	XB-ART-49662	25274813	Tam, B.M., Noorwez, S.M., Kaushal, S., Kono, M., and Moritz, O.L. (2014). Photoactivation-induced instability of rhodopsin mutants T4K and T17M in rod outer segments underlies retinal degeneration in X. laevis transgenic models of retinitis pigmentosa. J Neurosci 34(40), 13336-13348. doi: 10.1523/jneurosci.1655-14.2014.	2
	XB-ART-52992	28490005	Vent-Schmidt, R.Y.J., Wen, R.H., Zong, Z., Chiu, C.N., Tam, B.M., May, C.G., et al. (2017). Opposing Effects of Valproic Acid Treatment Mediated by Histone Deacetylase Inhibitor Activity in Four Transgenic X. laevis Models of Retinitis Pigmentosa. J Neurosci 37(4), 1039-1054. doi: 10.1523/JNEUROSCI.1647-16.2016.	2
	XB-ART-53664	28490005	Vent-Schmidt, R.Y.J., Wen, R.H., Zong, Z., Chiu, C.N., Tam, B.M., May, C.G., et al. (2017). Opposing Effects of Valproic Acid Treatment Mediated by Histone Deacetylase Inhibitor Activity in Four Transgenic X. laevis Models of Retinitis Pigmentosa. J Neurosci 37(4), 1039-1054. doi: 10.1523/JNEUROSCI.1647-16.2016.	2
	XB-ART-53879	28761125	Feehan, J.M., Chiu, C.N., Stanar, P., Tam, B.M., Ahmed, S.N., and Moritz, O.L. (2017). Modeling Dominant and Recessive Forms of Retinitis Pigmentosa by Editing Three Rhodopsin-Encoding Genes in Xenopus Laevis Using Crispr/Cas9. Sci Rep 7(1), 6920. doi: 10.1038/s41598-017-07153-4.	2
	XB-ART-8401	11556485	Jablonski, M.M. (2001). Investigating the mechanisms of retinal degenerations with antisense oligonucleotides. Doc Ophthalmol 102(3), 179-196.	2
retinitis pigmentosa 19	XB-ART-1500	16103129	Wiszniewski, W., Zaremba, C.M., Yatsenko, A.N., Jamrich, M., Wensel, T.G., Lewis, R.A., et al. (2005). ABCA4 mutations causing mislocalization are found frequently in patients with severe retinal dystrophies. Hum Mol Genet 14(19), 2769-2778. doi: 10.1093/hmg/ddi310.	2
retinoblastoma	XB-ART-52598	27739525	Naert, T., Colpaert, R., Van Nieuwenhuysen, T., Dimitrakopoulou, D., Leoen, J., Haustraete, J., et al. (2016). CRISPR/Cas9 mediated knockout of rb1 and rbl1 leads to rapid and penetrant retinoblastoma development in Xenopus tropicalis. Sci Rep 6, 35264. doi: 10.1038/srep35264.	3
	XB-ART-52973	28095622	Naert, T., Van Nieuwenhuysen, T., and Vleminckx, K. (2017). TALENs and CRISPR/Cas9 fuel genetically engineered clinically relevant Xenopus tropicalis tumor models. Genesis 55(1-2). doi: 10.1002/dvg.23005.	3
Rett syndrome	XB-ART-2503	15635068	Weaving, L.S., Ellaway, C.J., Gecz, J., and Christodoulou, J. (2005). Rett syndrome: clinical review and genetic update. J Med Genet 42(1), 1-7. doi: 10.1136/jmg.2004.027730.	1
rheumatoid arthritis	XB-ART-373	16683072	Janssens, N., Janicot, M., and Perera, T. (2006). The Wnt-dependent signaling pathways as target in oncology drug discovery. Invest New Drugs 24(4), 263-280. doi: 10.1007/s10637-005-5199-4.	1
	XB-ART-39785	19478043	Kalin, R.E., Banziger-Tobler, N.E., Detmar, M., and Brandli, A.W. (2009). An in vivo chemical library screen in Xenopus tadpoles reveals novel pathways involved in angiogenesis and lymphangiogenesis. Blood 114(5), 1110-1122. doi: 10.1182/blood-2009-03-211771.	1
rhinitis	XB-ART-43032	21183475	Dubaissi, E., and Papalopulu, N. (2011). Embryonic frog epidermis: a model for the study of cell-cell interactions in the development of mucociliary disease. Dis Model Mech 4(2), 179-192. doi: 10.1242/dmm.006494.	1
rickets	XB-ART-24689	1649826	Nakagawa, N., Arab, N., and Ghishan, F.K. (1991). Characterization of the defect in the Na(+)-phosphate transporter in vitamin D-resistant hypophosphatemic mice. J Biol Chem 266(21), 13616-13620.	1
Rothmund-Thomson syndrome	XB-ART-1754	15960976	Sangrithi, M.N., Bernal, J.A., Madine, M., Philpott, A., Lee, J., Dunphy, W.G., et al. (2005). Initiation of DNA replication requires the RECQL4 protein mutated in Rothmund-Thomson syndrome. Cell 121(6), 887-898. doi: 10.1016/j.cell.2005.05.015.	1
schizophrenia	XB-ART-1977	15858066	Hurst, R.S., Hajos, M., Raggenbass, M., Wall, T.M., Higdon, N.R., Lawson, J.A., et al. (2005). A novel positive allosteric modulator of the alpha7 neuronal nicotinic acetylcholine receptor: in vitro and in vivo characterization. J Neurosci 25(17), 4396-4405. doi: 10.1523/jneurosci.5269-04.2005.	1
	XB-ART-373	16683072	Janssens, N., Janicot, M., and Perera, T. (2006). The Wnt-dependent signaling pathways as target in oncology drug discovery. Invest New Drugs 24(4), 263-280. doi: 10.1007/s10637-005-5199-4.	1
	XB-ART-51216	26340537	Zhang, Q., Du, Y., Zhang, J., Xu, X., Xue, F., Guo, C., et al. (2015). Functional Impact of 14 Single Nucleotide Polymorphisms Causing Missense Mutations of Human alpha7 Nicotinic Receptor. PLoS One 10(9), e0137588. doi: 10.1371/journal.pone.0137588.	1
schneckenbecken dysplasia	XB-ART-50883	26100918	De Domenico, E., Owens, N.D., Grant, I.M., Gomes-Faria, R., and Gilchrist, M.J. (2015). Molecular asymmetry in the 8-cell stage Xenopus tropicalis embryo described by single blastomere transcript sequencing. Dev Biol 408(2), 252-268. doi: 10.1016/j.ydbio.2015.06.010.	1
scleroderma	XB-ART-20196	7529293	Takeuchi, K., Turley, S.J., Tan, E.M., and Pollard, K.M. (1995). Analysis of the autoantibody response to fibrillarin in human disease and murine models of autoimmunity. J Immunol 154(2), 961-971.	2
sclerosteosis	XB-ART-34899	17002572	Ellies, D.L., Viviano, B., McCarthy, J., Rey, J.P., Itasaki, N., Saunders, S., et al. (2006). Bone density ligand, Sclerostin, directly interacts with LRP5 but not LRP5G171V to modulate Wnt activity. J Bone Miner Res 21(11), 1738-1749. doi: 10.1359/jbmr.060810.	1
sclerosteosis 2	XB-ART-34899	17002572	Ellies, D.L., Viviano, B., McCarthy, J., Rey, J.P., Itasaki, N., Saunders, S., et al. (2006). Bone density ligand, Sclerostin, directly interacts with LRP5 but not LRP5G171V to modulate Wnt activity. J Bone Miner Res 21(11), 1738-1749. doi: 10.1359/jbmr.060810.	1
scoliosis	XB-ART-7098	12032359	Preisig-Muller, R., Schlichthorl, G., Goerge, T., Heinen, S., Bruggemann, A., Rajan, S., et al. (2002). Heteromerization of Kir2.x potassium channels contributes to the phenotype of Andersen's syndrome. Proc Natl Acad Sci U S A 99(11), 7774-7779. doi: 10.1073/pnas.102609499.	1
Seckel syndrome	XB-ART-50935	26150138	Rapchak, C.E., Patel, N., Hudson, J., and Crawford, M. (2015). Developmental role of plk4 in Xenopus laevis and Danio rerio: implications for Seckel Syndrome. Biochem Cell Biol 93(4), 396-404. doi: 10.1139/bcb-2015-0003.	1
Seckel syndrome 1	XB-ART-46434	23273981	Peterson, S.E., Li, Y., Wu-Baer, F., Chait, B.T., Baer, R., Yan, H., et al. (2013). Activation of DSB processing requires phosphorylation of CtIP by ATR. Mol Cell 49(4), 657-667. doi: 10.1016/j.molcel.2012.11.020.	1
Seckel syndrome 2	XB-ART-46434	23273981	Peterson, S.E., Li, Y., Wu-Baer, F., Chait, B.T., Baer, R., Yan, H., et al. (2013). Activation of DSB processing requires phosphorylation of CtIP by ATR. Mol Cell 49(4), 657-667. doi: 10.1016/j.molcel.2012.11.020.	1
secretory diarrhea	XB-ART-11601	10646604	Schroeder, B.C., Waldegger, S., Fehr, S., Bleich, M., Warth, R., Greger, R., et al. (2000). A constitutively open potassium channel formed by KCNQ1 and KCNE3. Nature 403(6766), 196-199. doi: 10.1038/35003200.	1
sex differentiation disease	XB-ART-52463	27611864	Li, Y.Y., Chen, J., and Qin, Z.F. (2016). Determining the optimal developmental stages of Xenopus laevis for initiating exposures to chemicals for sensitively detecting their feminizing effects on gonadal differentiation. Aquat Toxicol 179, 134-142. doi: 10.1016/j.aquatox.2016.09.002.	1
short QT syndrome	XB-ART-40437	19651618	Gustina, A.S., and Trudeau, M.C. (2009). A recombinant N-terminal domain fully restores deactivation gating in N-truncated and long QT syndrome mutant hERG potassium channels. Proc Natl Acad Sci U S A 106(31), 13082-13087. doi: 10.1073/pnas.0900180106.	1
	XB-ART-50616	24794859	Ambrosini, E., Sicca, F., Brignone, M.S., D'Adamo, M.C., Napolitano, C., Servettini, I., et al. (2014). Genetically induced dysfunctions of Kir2.1 channels: implications for short QT3 syndrome and autism-epilepsy phenotype. Hum Mol Genet 23(18), 4875-4886. doi: 10.1093/hmg/ddu201.	1
sinoatrial node disease	XB-ART-53105	28219978	Stallmeyer, B., Kuss, J., Kotthoff, S., Zumhagen, S., Vowinkel, K., Rinne, S., et al. (2017). A Mutation in the G-Protein Gene GNB2 Causes Familial Sinus Node and Atrioventricular Conduction Dysfunction. Circ Res 120(10), e33-e44. doi: 10.1161/CIRCRESAHA.116.310112.	2
sinusitis	XB-ART-43032	21183475	Dubaissi, E., and Papalopulu, N. (2011). Embryonic frog epidermis: a model for the study of cell-cell interactions in the development of mucociliary disease. Dis Model Mech 4(2), 179-192. doi: 10.1242/dmm.006494.	1
situs inversus	XB-ART-53774	28621423	Gur, M., Cohen, E.B., Genin, O., Fainsod, A., Perles, Z., and Cinnamon, Y. (2017). Roles of the cilium-associated gene CCDC11 in left-right patterning and in laterality disorders in humans. Int J Dev Biol 61(3-4-5), 267-276. doi: 10.1387/ijdb.160442yc.	1
	XB-ART-54467	29257953	Sigg, M.A., Menchen, T., Lee, C., Johnson, J., Jungnickel, M.K., Choksi, S.P., et al. (2017). Evolutionary Proteomics Uncovers Ancient Associations of Cilia with Signaling Pathways. Dev Cell 43(6), 744-762.e711. doi: 10.1016/j.devcel.2017.11.014.	1
skin atrophy	XB-ART-32429	61558	Tabira, T., Webster, H.D., and Wray, S.H. (1976). Multiple sclerosis cerebrospinal fluid produces myelin lesions in tadpole optic nerves. N Engl J Med 295(12), 644-649. doi: 10.1056/NEJM197609162951204.	1
skin disease	XB-ART-51514	26546114	Noiret, M., Mottier, S., Angrand, G., Gautier-Courteille, C., Lerivray, H., Viet, J., et al. (2016). Ptbp1 and Exosc9 knockdowns trigger skin stability defects through different pathways. Dev Biol 409(2), 489-501. doi: 10.1016/j.ydbio.2015.11.002.	1
sleeping sickness	XB-ART-39973	19444208	Dean, S., Marchetti, R., Kirk, K., and Matthews, K.R. (2009). A surface transporter family conveys the trypanosome differentiation signal. Nature 459(7244), 213-217. doi: 10.1038/nature07997.	1
Smith-Lemli-Opitz syndrome	XB-ART-7468	11898849	Harmon, E.B., Ko, A.H., and Kim, S.K. (2002). Hedgehog signaling in gastrointestinal development and disease. Curr Mol Med 2(1), 67-82.	1
Smith-Magenis syndrome	XB-ART-49094	24878353	Tahir, R., Kennedy, A., Elsea, S.H., and Dickinson, A.J. (2014). Retinoic acid induced-1 (Rai1) regulates craniofacial and brain development in Xenopus. Mech Dev 133, 91-104. doi: 10.1016/j.mod.2014.05.004.	1
	XB-ART-53080	28255527	Dubey, A., and Saint-Jeannet, J.P. (2017). Modeling human craniofacial disorders in Xenopus. Curr Pathobiol Rep 5(1), 79-92. doi: 10.1007/s40139-017-0128-8.	1
Sotos syndrome	XB-ART-40836	19808676	Li, Y., Trojer, P., Xu, C.F., Cheung, P., Kuo, A., Drury, W.J., 3rd, et al. (2009). The target of the NSD family of histone lysine methyltransferases depends on the nature of the substrate. J Biol Chem 284(49), 34283-34295. doi: 10.1074/jbc.M109.034462.	1
spinal muscular atrophy	XB-ART-1290	16204184	Winkler, C., Eggert, C., Gradl, D., Meister, G., Giegerich, M., Wedlich, D., et al. (2005). Reduced U snRNP assembly causes motor axon degeneration in an animal model for spinal muscular atrophy. Genes Dev 19(19), 2320-2330. doi: 10.1101/gad.342005.	1
spinocerebellar ataxia type 1	XB-ART-53653	28462392	Li, W.C., Zhu, X.Y., and Ritson, E. (2017). Mechanosensory Stimulation Evokes Acute Concussion-Like Behavior by Activating GIRKs Coupled to Muscarinic Receptors in a Simple Vertebrate. eNeuro 4(2). doi: 10.1523/eneuro.0073-17.2017.	1
splenic disease	XB-ART-52667	27784267	Robson, A., Owens, N.D., Baserga, S.J., Khokha, M.K., and Griffin, J.N. (2016). Expression of ribosomopathy genes during Xenopus tropicalis embryogenesis. BMC Dev Biol 16(1), 38. doi: 10.1186/s12861-016-0138-5.	1
Stargardt disease	XB-ART-1500	16103129	Wiszniewski, W., Zaremba, C.M., Yatsenko, A.N., Jamrich, M., Wensel, T.G., Lewis, R.A., et al. (2005). ABCA4 mutations causing mislocalization are found frequently in patients with severe retinal dystrophies. Hum Mol Genet 14(19), 2769-2778. doi: 10.1093/hmg/ddi310.	2
status epilepticus	XB-ART-49403	24952362	Rojas, A., Gueorguieva, P., Lelutiu, N., Quan, Y., Shaw, R., and Dingledine, R. (2014). The prostaglandin EP1 receptor potentiates kainate receptor activation via a protein kinase C pathway and exacerbates status epilepticus. Neurobiol Dis 70, 74-89. doi: 10.1016/j.nbd.2014.06.004.	1
substance abuse	XB-ART-427	16626657	Del Re, A.M., Dopico, A.M., and Woodward, J.J. (2006). Effects of the abused inhalant toluene on ethanol-sensitive potassium channels expressed in oocytes. Brain Res 1087(1), 75-82. doi: 10.1016/j.brainres.2006.03.031.	1
subvalvular aortic stenosis	XB-ART-49131	24898977	Stern, J.A., White, S.N., Lehmkuhl, L.B., Reina-Doreste, Y., Ferguson, J.L., Nascone-Yoder, N.M., et al. (2014). A single codon insertion in PICALM is associated with development of familial subvalvular aortic stenosis in Newfoundland dogs. Hum Genet 133(9), 1139-1148. doi: 10.1007/s00439-014-1454-0.	1
sudden infant death syndrome	XB-ART-47809	24334129	Mechakra, A., Vincent, Y., Chevalier, P., Millat, G., Ficker, E., Jastrzebski, M., et al. (2014). The variant hERG/R148W associated with LQTS is a mutation that reduces current density on co-expression with the WT. Gene 536(2), 348-356. doi: 10.1016/j.gene.2013.11.072.	0
syndactyly	XB-ART-54158	28679688	Johnston, J.J., Lee, C., Wentzensen, I.M., Parisi, M.A., Crenshaw, M.M., Sapp, J.C., et al. (2017). Compound heterozygous alterations in intraflagellar transport protein CLUAP1 in a child with a novel Joubert and oral-facial-digital overlap syndrome. Cold Spring Harb Mol Case Stud 3(4). doi: 10.1101/mcs.a001321.	1
syndromic intellectual disability	XB-ART-52368	27550844	Palmer, E.E., Stuhlmann, T., Weinert, S., Haan, E., Van Esch, H., Holvoet, M., et al. (2018). De novo and inherited mutations in the X-linked gene CLCN4 are associated with syndromic intellectual disability and behavior and seizure disorders in males and females. Mol Psychiatry 23(2), 222-230. doi: 10.1038/mp.2016.135.	1
syndromic X-linked intellectual disability	XB-ART-52368	27550844	Palmer, E.E., Stuhlmann, T., Weinert, S., Haan, E., Van Esch, H., Holvoet, M., et al. (2018). De novo and inherited mutations in the X-linked gene CLCN4 are associated with syndromic intellectual disability and behavior and seizure disorders in males and females. Mol Psychiatry 23(2), 222-230. doi: 10.1038/mp.2016.135.	1
	XB-ART-54172	29053855	Niturad, C.E., Lev, D., Kalscheuer, V.M., Charzewska, A., Schubert, J., Lerman-Sagie, T., et al. (2017). Rare GABRA3 variants are associated with epileptic seizures, encephalopathy and dysmorphic features. Brain 140(11), 2879-2894. doi: 10.1093/brain/awx236.	1
systemic lupus erythematosus	XB-ART-20196	7529293	Takeuchi, K., Turley, S.J., Tan, E.M., and Pollard, K.M. (1995). Analysis of the autoantibody response to fibrillarin in human disease and murine models of autoimmunity. J Immunol 154(2), 961-971.	2
tauopathy	XB-ART-2546	15615643	Lee, V.M., Kenyon, T.K., and Trojanowski, J.Q. (2005). Transgenic animal models of tauopathies. Biochim Biophys Acta 1739(2-3), 251-259. doi: 10.1016/j.bbadis.2004.06.014.	1
	XB-ART-46440	23271055	Jinwal, U.K., Akoury, E., Abisambra, J.F., O'Leary, J.C., 3rd, Thompson, A.D., Blair, L.J., et al. (2013). Imbalance of Hsp70 family variants fosters tau accumulation. Faseb j 27(4), 1450-1459. doi: 10.1096/fj.12-220889.	1
	XB-ART-51258	26348728	Ullah, G., Demuro, A., Parker, I., and Pearson, J.E. (2015). Analyzing and Modeling the Kinetics of Amyloid Beta Pores Associated with Alzheimer's Disease Pathology. PLoS One 10(9), e0137357. doi: 10.1371/journal.pone.0137357.	1
T-cell leukemia	XB-ART-7659	11840327	Davis, R.L., and Turner, D.L. (2001). Vertebrate hairy and Enhancer of split related proteins: transcriptional repressors regulating cellular differentiation and embryonic patterning. Oncogene 20(58), 8342-8357. doi: 10.1038/sj.onc.1205094.	3
temporal lobe epilepsy	XB-ART-41650	20133704	Mazzuferi, M., Palma, E., Martinello, K., Maiolino, F., Roseti, C., Fucile, S., et al. (2010). Enhancement of GABA(A)-current run-down in the hippocampus occurs at the first spontaneous seizure in a model of temporal lobe epilepsy. Proc Natl Acad Sci U S A 107(7), 3180-3185. doi: 10.1073/pnas.0914710107.	1
	XB-ART-50976	26168875	Roseti, C., van Vliet, E.A., Cifelli, P., Ruffolo, G., Baayen, J.C., Di Castro, M.A., et al. (2015). GABAA currents are decreased by IL-1beta in epileptogenic tissue of patients with temporal lobe epilepsy: implications for ictogenesis. Neurobiol Dis 82, 311-320. doi: 10.1016/j.nbd.2015.07.003.	1
	XB-ART-5425	12699773	Fueta, Y., Vasilets, L.A., Takeda, K., Kawamura, M., and Schwarz, W. (2003). Down-regulation of GABA-transporter function by hippocampal translation products: its possible role in epilepsy. Neuroscience 118(2), 371-378.	1
	XB-ART-6914	12097483	Bianchi, M.T., Song, L., Zhang, H., and Macdonald, R.L. (2002). Two different mechanisms of disinhibition produced by GABAA receptor mutations linked to epilepsy in humans. J Neurosci 22(13), 5321-5327. doi: 20026554.	1
thyroid gland disease	XB-ART-31232	6125553	de Vijlder, J.J., van Ommen, G.J., van Voorthuizen, W.F., Koch, C.A., Arnberg, A.C., Vassart, G., et al. (1981). Nonfunctional thyroglobulin messenger RNA in goats with hereditary congenital goiter. J Mol Appl Genet 1(1), 51-59.	1
Timothy syndrome	XB-ART-2951	15454078	Splawski, I., Timothy, K.W., Sharpe, L.M., Decher, N., Kumar, P., Bloise, R., et al. (2004). Ca(V)1.2 calcium channel dysfunction causes a multisystem disorder including arrhythmia and autism. Cell 119(1), 19-31. doi: 10.1016/j.cell.2004.09.011.	1
Townes-Brocks syndrome	XB-ART-52914	28054444	Webb, B.D., Metikala, S., Wheeler, P.G., Sherpa, M.D., Houten, S.M., Horb, M.E., et al. (2017). Heterozygous Pathogenic Variant in DACT1 Causes an Autosomal-Dominant Syndrome with Features Overlapping Townes-Brocks Syndrome. Hum Mutat 38(4), 373-377. doi: 10.1002/humu.23171.	1
toxic encephalopathy	XB-ART-22829	7679115	Karp, S.J., Masu, M., Eki, T., Ozawa, K., and Nakanishi, S. (1993). Molecular cloning and chromosomal localization of the key subunit of the human N-methyl-D-aspartate receptor. J Biol Chem 268(5), 3728-3733.	1
toxoplasmosis	XB-ART-6521	12238947	Joet, T., Holterman, L., Stedman, T.T., Kocken, C.H., Van Der Wel, A., Thomas, A.W., et al. (2002). Comparative characterization of hexose transporters of Plasmodium knowlesi, Plasmodium yoelii and Toxoplasma gondii highlights functional differences within the apicomplexan family. Biochem J 368(Pt 3), 923-929. doi: 10.1042/bj20021189.	1
transient neonatal diabetes mellitus	XB-ART-51783	26806634	Kofent, J., and Spagnoli, F.M. (2016). Xenopus as a model system for studying pancreatic development and diabetes. Semin Cell Dev Biol 51, 106-116. doi: 10.1016/j.semcdb.2016.01.005.	1
Treacher Collins syndrome	XB-ART-1447	16125876	Gonzales, B., Yang, H., Henning, D., and Valdez, B.C. (2005). Cloning and functional characterization of the Xenopus orthologue of the Treacher Collins syndrome (TCOF1) gene product. Gene 359, 73-80. doi: 10.1016/j.gene.2005.04.042.	1
	XB-ART-52667	27784267	Robson, A., Owens, N.D., Baserga, S.J., Khokha, M.K., and Griffin, J.N. (2016). Expression of ribosomopathy genes during Xenopus tropicalis embryogenesis. BMC Dev Biol 16(1), 38. doi: 10.1186/s12861-016-0138-5.	1
	XB-ART-54953	29364875	Calo, E., Gu, B., Bowen, M.E., Aryan, F., Zalc, A., Liang, J., et al. (2018). Tissue-selective effects of nucleolar stress and rDNA damage in developmental disorders. Nature 554(7690), 112-117. doi: 10.1038/nature25449.	1
tuberous sclerosis	XB-ART-51813	26851624	Lienkamp, S.S. (2016). Using Xenopus to study genetic kidney diseases. Semin Cell Dev Biol 51, 117-124. doi: 10.1016/j.semcdb.2016.02.002.	1
type 2 diabetes mellitus	XB-ART-37571	18418350	Dudziak, K., Mottalebi, N., Senkel, S., Edghill, E.L., Rosengarten, S., Roose, M., et al. (2008). Transcription factor HNF1beta and novel partners affect nephrogenesis. Kidney Int 74(2), 210-217. doi: 10.1038/ki.2008.149.	1
	XB-ART-38350	18783407	Pearl, E.J., and Horb, M.E. (2008). Promoting ectopic pancreatic fates: pancreas development and future diabetes therapies. Clin Genet 74(4), 316-324. doi: 10.1111/j.1399-0004.2008.01081.x.	1
	XB-ART-41071	19786623	Marrero, M.B., Lucas, R., Salet, C., Hauser, T.A., Mazurov, A., Lippiello, P.M., et al. (2010). An alpha7 nicotinic acetylcholine receptor-selective agonist reduces weight gain and metabolic changes in a mouse model of diabetes. J Pharmacol Exp Ther 332(1), 173-180. doi: 10.1124/jpet.109.154633.	1
	XB-ART-54054	28945431	Han, J., Fei, Y., Zhou, F., Chen, X., Zheng, W., and Fu, J. (2017). Micellar Nanomedicine of Novel Fatty Acid Modified Xenopus Glucagon-like Peptide-1: Improved Physicochemical Characteristics and Therapeutic Utilities for Type 2 Diabetes. Mol Pharm 14(11), 3954-3967. doi: 10.1021/acs.molpharmaceut.7b00632.	1
ulcerative colitis	XB-ART-54087	28971850	Amir Shaghaghi, M., Zhouyao, H., Tu, H., El-Gabalawy, H., Crow, G.H., Levine, M., et al. (2017). The SLC2A14 gene, encoding the novel glucose/dehydroascorbate transporter GLUT14, is associated with inflammatory bowel disease. Am J Clin Nutr 106(6), 1508-1513. doi: 10.3945/ajcn.116.147603.	1
urea cycle disorder	XB-ART-54170	29055942	Burckhardt, B.C., and Burckhardt, G. (2017). Interaction of Excitatory Amino Acid Transporters 1 - 3 (EAAT1, EAAT2, EAAT3) with N-Carbamoylglutamate and N-Acetylglutamate. Cell Physiol Biochem 43(5), 1907-1916. doi: 10.1159/000484110.	1
urofacial syndrome	XB-ART-48761	24691552	Roberts, N.A., Woolf, A.S., Stuart, H.M., Thuret, R., McKenzie, E.A., Newman, W.G., et al. (2014). Heparanase 2, mutated in urofacial syndrome, mediates peripheral neural development in Xenopus. Hum Mol Genet 23(16), 4302-4314. doi: 10.1093/hmg/ddu147.	1
vestibular disease	XB-ART-51592	26582541	Ramirez-Gordillo, D., Powers, T.R., van Velkinburgh, J.C., Trujillo-Provencio, C., Schilkey, F., and Serrano, E.E. (2015). RNA-Seq and microarray analysis of the Xenopus inner ear transcriptome discloses orthologous OMIM((R)) genes for hereditary disorders of hearing and balance. BMC Res Notes 8, 691. doi: 10.1186/s13104-015-1485-1.	2
viral infectious disease	XB-ART-28251	3031203	Morier, L., Cantelar, N., and Soler, M. (1987). Infection of a poikilothermic cell line (XL-2) with eastern equine encephalitis and western equine encephalitis viruses. J Med Virol 21(3), 277-281.	1
	XB-ART-45452	22719994	Li, L., Wen, L., Gong, Y., Mei, G., Liu, J., Chen, Y., et al. (2012). Xenopus as a model system for the study of GOLPH2/GP73 function: Xenopus GOLPH2 is required for pronephros development. PLoS One 7(6), e38939. doi: 10.1371/journal.pone.0038939.	1
visceral heterotaxy	XB-ART-13935	9825674	Ramsdell, A.F., and Yost, H.J. (1998). Molecular mechanisms of vertebrate left-right development. Trends Genet 14(11), 459-465.	1
	XB-ART-42765	21282601	Fakhro, K.A., Choi, M., Ware, S.M., Belmont, J.W., Towbin, J.A., Lifton, R.P., et al. (2011). Rare copy number variations in congenital heart disease patients identify unique genes in left-right patterning. Proc Natl Acad Sci U S A 108(7), 2915-2920. doi: 10.1073/pnas.1019645108.	1
	XB-ART-44757	22285814	Cast, A.E., Gao, C., Amack, J.D., and Ware, S.M. (2012). An essential and highly conserved role for Zic3 in left-right patterning, gastrulation and convergent extension morphogenesis. Dev Biol 364(1), 22-31. doi: 10.1016/j.ydbio.2012.01.011.	1
	XB-ART-46213	23150524	van Veenendaal, N.R., Ulmer, B., Boskovski, M.T., Fang, X., Khokha, M.K., Wendler, C.C., et al. (2013). Embryonic exposure to propylthiouracil disrupts left-right patterning in Xenopus embryos. Faseb j 27(2), 684-691. doi: 10.1096/fj.12-218073.	1
	XB-ART-47779	24226769	Boskovski, M.T., Yuan, S., Pedersen, N.B., Goth, C.K., Makova, S., Clausen, H., et al. (2013). The heterotaxy gene GALNT11 glycosylates Notch to orchestrate cilia type and laterality. Nature 504(7480), 456-459. doi: 10.1038/nature12723.	1
	XB-ART-4893	12900569	Herman, G.E., and El-Hodiri, H.M. (2002). The role of ZIC3 in vertebrate development. Cytogenet Genome Res 99(1-4), 229-235. doi: 10.1159/000071598.	1
	XB-ART-51433	26493400	Endicott, S.J., Basu, B., Khokha, M., and Brueckner, M. (2015). The NIMA-like kinase Nek2 is a key switch balancing cilia biogenesis and resorption in the development of left-right asymmetry. Development 142(23), 4068-4079. doi: 10.1242/dev.126953.	1
	XB-ART-51512	26546975	Bhattacharya, D., Marfo, C.A., Li, D., Lane, M., and Khokha, M.K. (2015). CRISPR/Cas9: An inexpensive, efficient loss of function tool to screen human disease genes in Xenopus. Dev Biol 408(2), 196-204. doi: 10.1016/j.ydbio.2015.11.003.	1
	XB-ART-51522	26538025	Silva, E., Betleja, E., John, E., Spear, P., Moresco, J.J., Zhang, S., et al. (2016). Ccdc11 is a novel centriolar satellite protein essential for ciliogenesis and establishment of left-right asymmetry. Mol Biol Cell 27(1), 48-63. doi: 10.1091/mbc.E15-07-0474.	1
	XB-ART-51896	26910255	Duncan, A.R., and Khokha, M.K. (2016). Xenopus as a model organism for birth defects-Congenital heart disease and heterotaxy. Semin Cell Dev Biol 51, 73-79. doi: 10.1016/j.semcdb.2016.02.022.	1
	XB-ART-52470	27593162	Del Viso, F., Huang, F., Myers, J., Chalfant, M., Zhang, Y., Reza, N., et al. (2016). Congenital Heart Disease Genetics Uncovers Context-Dependent Organization and Function of Nucleoporins at Cilia. Dev Cell 38(5), 478-492. doi: 10.1016/j.devcel.2016.08.002.	1
	XB-ART-52702	27821535	Cowan, J.R., Tariq, M., Shaw, C., Rao, M., Belmont, J.W., Lalani, S.R., et al. (2016). Copy number variation as a genetic basis for heterotaxy and heterotaxy-spectrum congenital heart defects. Philos Trans R Soc Lond B Biol Sci 371(1710). doi: 10.1098/rstb.2015.0406.	1
	XB-ART-52703	27821521	McDowell, G., Rajadurai, S., and Levin, M. (2016). From cytoskeletal dynamics to organ asymmetry: a nonlinear, regulative pathway underlies left-right patterning. Philos Trans R Soc Lond B Biol Sci 371(1710). doi: 10.1098/rstb.2015.0409.	1
	XB-ART-52996	28132423	Tisler, M., Schweickert, A., and Blum, M. (2017). Xenopus, an ideal model organism to study laterality in conjoined twins. Genesis 55(1-2). doi: 10.1002/dvg.22993.	1
	XB-ART-53052	28190730	Tisler, M., Thumberger, T., Schneider, I., Schweickert, A., and Blum, M. (2017). Leftward Flow Determines Laterality in Conjoined Twins. Curr Biol 27(4), 543-548. doi: 10.1016/j.cub.2016.12.049.	1
	XB-ART-53117	28195132	Deniz, E., Jonas, S., Hooper, M., J, N.G., Choma, M.A., and Khokha, M.K. (2017). Analysis of Craniocardiac Malformations in Xenopus using Optical Coherence Tomography. Sci Rep 7, 42506. doi: 10.1038/srep42506.	1
	XB-ART-53774	28621423	Gur, M., Cohen, E.B., Genin, O., Fainsod, A., Perles, Z., and Cinnamon, Y. (2017). Roles of the cilium-associated gene CCDC11 in left-right patterning and in laterality disorders in humans. Int J Dev Biol 61(3-4-5), 267-276. doi: 10.1387/ijdb.160442yc.	1
	XB-ART-54232	29082114	Garfinkel, A.M., and Khokha, M.K. (2017). An interspecies heart-to-heart: Using Xenopus to uncover the genetic basis of congenital heart disease. Curr Pathobiol Rep 5(2), 187-196. doi: 10.1007/s40139-017-0142-x.	1
	XB-ART-8982	11376438	Kathiriya, I.S., and Srivastava, D. (2000). Left-right asymmetry and cardiac looping: implications for cardiac development and congenital heart disease. Am J Med Genet 97(4), 271-279.	1
Waardenburg's syndrome	XB-ART-48853	20308572	McGary, K.L., Park, T.J., Woods, J.O., Cha, H.J., Wallingford, J.B., and Marcotte, E.M. (2010). Systematic discovery of nonobvious human disease models through orthologous phenotypes. Proc Natl Acad Sci U S A 107(14), 6544-6549. doi: 10.1073/pnas.0910200107.	1
Western equine encephalitis	XB-ART-28251	3031203	Morier, L., Cantelar, N., and Soler, M. (1987). Infection of a poikilothermic cell line (XL-2) with eastern equine encephalitis and western equine encephalitis viruses. J Med Virol 21(3), 277-281.	1
Williams-Beuren syndrome	XB-ART-45396	22691402	Barnett, C., Yazgan, O., Kuo, H.C., Malakar, S., Thomas, T., Fitzgerald, A., et al. (2012). Williams Syndrome Transcription Factor is critical for neural crest cell function in Xenopus laevis. Mech Dev 129(9-12), 324-338. doi: 10.1016/j.mod.2012.06.001.	1
Wolf-Hirschhorn syndrome	XB-ART-40836	19808676	Li, Y., Trojer, P., Xu, C.F., Cheung, P., Kuo, A., Drury, W.J., 3rd, et al. (2009). The target of the NSD family of histone lysine methyltransferases depends on the nature of the substrate. J Biol Chem 284(49), 34283-34295. doi: 10.1074/jbc.M109.034462.	1
X-linked hypophosphatemic rickets	XB-ART-20949	8070635	Collins, J.F., and Ghishan, F.K. (1994). Molecular cloning, functional expression, tissue distribution, and in situ hybridization of the renal sodium phosphate (Na+/P(i)) transporter in the control and hypophosphatemic mouse. Faseb j 8(11), 862-868.	1
X-linked nonsyndromic deafness	XB-ART-42288	20668882	Naranjo, S., Voesenek, K., de la Calle-Mustienes, E., Robert-Moreno, A., Kokotas, H., Grigoriadou, M., et al. (2010). Multiple enhancers located in a 1-Mb region upstream of POU3F4 promote expression during inner ear development and may be required for hearing. Hum Genet 128(4), 411-419. doi: 10.1007/s00439-010-0864-x.	2

## Sheet: DO XB-ART associations
XB-ART-ID	Pubmed ID	DOID	DO Term	Nervous system disease	Genetic disease	Sensory system disease	Musculoskeletal system disease	Cancer	Cardiovascular system disease	Urinary system disease	Disease of metabolism	Disease of mental health	Physical disorder	Hematopoietic system disease	Gastrointestinal system disease	Endocrine system disease	Immune system disease	Disease by infectious agent	Reproductive system disease	Integumentary system disease	Respiratory system disease	Reference	Category count	High level DO term	TRUE
XB-ART-9626	11166117	DOID:0060170	generalized epilepsy with febrile seizures plus	TRUE	FALSE	FALSE	FALSE	FALSE	FALSE	FALSE	FALSE	FALSE	FALSE	FALSE	FALSE	FALSE	FALSE	FALSE	FALSE	FALSE	FALSE	Kearney, J.A., Plummer, N.W., Smith, M.R., Kapur, J., Cummins, T.R., Waxman, S.G., et al. (2001). A gain-of-function mutation in the sodium channel gene Scn2a results in seizures and behavioral abnormalities. Neuroscience 102(2), 307-317.	1	Nervous system disease
XB-ART-9626	11166117	DOID:2843	long QT syndrome	FALSE	FALSE	FALSE	FALSE	FALSE	TRUE	FALSE	FALSE	FALSE	FALSE	FALSE	FALSE	FALSE	FALSE	FALSE	FALSE	FALSE	FALSE	Kearney, J.A., Plummer, N.W., Smith, M.R., Kapur, J., Cummins, T.R., Waxman, S.G., et al. (2001). A gain-of-function mutation in the sodium channel gene Scn2a results in seizures and behavioral abnormalities. Neuroscience 102(2), 307-317.	1	Cardiovascular system disease
XB-ART-9377	11257091	DOID:0060051	autoimmune disease of cardiovascular system	FALSE	FALSE	FALSE	FALSE	FALSE	FALSE	FALSE	FALSE	FALSE	FALSE	FALSE	FALSE	FALSE	TRUE	FALSE	FALSE	FALSE	FALSE	Xiao, G.Q., Hu, K., and Boutjdir, M. (2001). Direct inhibition of expressed cardiac l- and t-type calcium channels by igg from mothers whose children have congenital heart block. Circulation 103(11), 1599-1604.	1	Immune system disease
XB-ART-9377	11257091	DOID:2914	immune system disease	FALSE	FALSE	FALSE	FALSE	FALSE	FALSE	FALSE	FALSE	FALSE	FALSE	FALSE	FALSE	FALSE	TRUE	FALSE	FALSE	FALSE	FALSE	Xiao, G.Q., Hu, K., and Boutjdir, M. (2001). Direct inhibition of expressed cardiac l- and t-type calcium channels by igg from mothers whose children have congenital heart block. Circulation 103(11), 1599-1604.	1	Immune system disease
XB-ART-9377	11257091	DOID:990	congenital heart block	FALSE	FALSE	FALSE	FALSE	FALSE	TRUE	FALSE	FALSE	FALSE	FALSE	FALSE	FALSE	FALSE	FALSE	FALSE	FALSE	FALSE	FALSE	Xiao, G.Q., Hu, K., and Boutjdir, M. (2001). Direct inhibition of expressed cardiac l- and t-type calcium channels by igg from mothers whose children have congenital heart block. Circulation 103(11), 1599-1604.	1	Cardiovascular system disease
XB-ART-9124	11325342	DOID:0050542	Charcot-Marie-Tooth disease type X	TRUE	FALSE	FALSE	FALSE	FALSE	FALSE	FALSE	FALSE	FALSE	FALSE	FALSE	FALSE	FALSE	FALSE	FALSE	FALSE	FALSE	FALSE	Abrams, C.K., Freidin, M.M., Verselis, V.K., Bennett, M.V., and Bargiello, T.A. (2001). Functional alterations in gap junction channels formed by mutant forms of connexin 32: evidence for loss of function as a pathogenic mechanism in the X-linked form of Charcot-Marie-Tooth disease. Brain Res 900(1), 9-25.	1	Nervous system disease
XB-ART-9124	11325342	DOID:0110209	Charcot-Marie-Tooth disease X-linked dominant 1	TRUE	FALSE	FALSE	FALSE	FALSE	FALSE	FALSE	FALSE	FALSE	FALSE	FALSE	FALSE	FALSE	FALSE	FALSE	FALSE	FALSE	FALSE	Abrams, C.K., Freidin, M.M., Verselis, V.K., Bennett, M.V., and Bargiello, T.A. (2001). Functional alterations in gap junction channels formed by mutant forms of connexin 32: evidence for loss of function as a pathogenic mechanism in the X-linked form of Charcot-Marie-Tooth disease. Brain Res 900(1), 9-25.	1	Nervous system disease
XB-ART-9124	11325342	DOID:10595	Charcot-Marie-Tooth disease	TRUE	FALSE	FALSE	FALSE	FALSE	FALSE	FALSE	FALSE	FALSE	FALSE	FALSE	FALSE	FALSE	FALSE	FALSE	FALSE	FALSE	FALSE	Abrams, C.K., Freidin, M.M., Verselis, V.K., Bennett, M.V., and Bargiello, T.A. (2001). Functional alterations in gap junction channels formed by mutant forms of connexin 32: evidence for loss of function as a pathogenic mechanism in the X-linked form of Charcot-Marie-Tooth disease. Brain Res 900(1), 9-25.	1	Nervous system disease
XB-ART-9124	11325342	DOID:0050542	Charcot-Marie-Tooth disease type X	FALSE	FALSE	FALSE	TRUE	FALSE	FALSE	FALSE	FALSE	FALSE	FALSE	FALSE	FALSE	FALSE	FALSE	FALSE	FALSE	FALSE	FALSE	Abrams, C.K., Freidin, M.M., Verselis, V.K., Bennett, M.V., and Bargiello, T.A. (2001). Functional alterations in gap junction channels formed by mutant forms of connexin 32: evidence for loss of function as a pathogenic mechanism in the X-linked form of Charcot-Marie-Tooth disease. Brain Res 900(1), 9-25.	1	Musculoskeletal system disease
XB-ART-9124	11325342	DOID:0110209	Charcot-Marie-Tooth disease X-linked dominant 1	FALSE	FALSE	FALSE	TRUE	FALSE	FALSE	FALSE	FALSE	FALSE	FALSE	FALSE	FALSE	FALSE	FALSE	FALSE	FALSE	FALSE	FALSE	Abrams, C.K., Freidin, M.M., Verselis, V.K., Bennett, M.V., and Bargiello, T.A. (2001). Functional alterations in gap junction channels formed by mutant forms of connexin 32: evidence for loss of function as a pathogenic mechanism in the X-linked form of Charcot-Marie-Tooth disease. Brain Res 900(1), 9-25.	1	Musculoskeletal system disease
XB-ART-9124	11325342	DOID:10595	Charcot-Marie-Tooth disease	FALSE	FALSE	FALSE	TRUE	FALSE	FALSE	FALSE	FALSE	FALSE	FALSE	FALSE	FALSE	FALSE	FALSE	FALSE	FALSE	FALSE	FALSE	Abrams, C.K., Freidin, M.M., Verselis, V.K., Bennett, M.V., and Bargiello, T.A. (2001). Functional alterations in gap junction channels formed by mutant forms of connexin 32: evidence for loss of function as a pathogenic mechanism in the X-linked form of Charcot-Marie-Tooth disease. Brain Res 900(1), 9-25.	1	Musculoskeletal system disease
XB-ART-9009	11360485	DOID:1826	epilepsy	TRUE	FALSE	FALSE	FALSE	FALSE	FALSE	FALSE	FALSE	FALSE	FALSE	FALSE	FALSE	FALSE	FALSE	FALSE	FALSE	FALSE	FALSE	Sugaya, A. (2001). [Cellular mechanism of seizure discharge and its normalization by a herbal mixture prescription "saikokeishito-ka-shakuyaku" (SK)]. Yakugaku Zasshi 121(5), 295-317.	1	Nervous system disease
XB-ART-9009	11360485	DOID:2234	focal epilepsy	TRUE	FALSE	FALSE	FALSE	FALSE	FALSE	FALSE	FALSE	FALSE	FALSE	FALSE	FALSE	FALSE	FALSE	FALSE	FALSE	FALSE	FALSE	Sugaya, A. (2001). [Cellular mechanism of seizure discharge and its normalization by a herbal mixture prescription "saikokeishito-ka-shakuyaku" (SK)]. Yakugaku Zasshi 121(5), 295-317.	1	Nervous system disease
XB-ART-8982	11376438	DOID:0050545	visceral heterotaxy	FALSE	FALSE	FALSE	FALSE	FALSE	FALSE	FALSE	FALSE	FALSE	TRUE	FALSE	FALSE	FALSE	FALSE	FALSE	FALSE	FALSE	FALSE	Kathiriya, I.S., and Srivastava, D. (2000). Left-right asymmetry and cardiac looping: implications for cardiac development and congenital heart disease. Am J Med Genet 97(4), 271-279.	1	Physical disorder
XB-ART-8982	11376438	DOID:1682	congenital heart disease	FALSE	FALSE	FALSE	FALSE	FALSE	TRUE	FALSE	FALSE	FALSE	FALSE	FALSE	FALSE	FALSE	FALSE	FALSE	FALSE	FALSE	FALSE	Kathiriya, I.S., and Srivastava, D. (2000). Left-right asymmetry and cardiac looping: implications for cardiac development and congenital heart disease. Am J Med Genet 97(4), 271-279.	1	Cardiovascular system disease
xb-art-890	16382135	DOID:12450	pancytopenia	FALSE	FALSE	FALSE	FALSE	FALSE	FALSE	FALSE	FALSE	FALSE	FALSE	TRUE	FALSE	FALSE	FALSE	FALSE	FALSE	FALSE	FALSE	Sobeck, A., Stone, S., Costanzo, V., de Graaf, B., Reuter, T., de Winter, J., et al. (2006). Fanconi anemia proteins are required to prevent accumulation of replication-associated DNA double-strand breaks. Mol Cell Biol 26(2), 425-437. doi: 10.1128/MCB.26.2.425-437.2006.	1	Hematopoietic system disease
xb-art-890	16382135	DOID:13636	Fanconi anemia	FALSE	FALSE	FALSE	FALSE	FALSE	FALSE	FALSE	FALSE	FALSE	FALSE	TRUE	FALSE	FALSE	FALSE	FALSE	FALSE	FALSE	FALSE	Sobeck, A., Stone, S., Costanzo, V., de Graaf, B., Reuter, T., de Winter, J., et al. (2006). Fanconi anemia proteins are required to prevent accumulation of replication-associated DNA double-strand breaks. Mol Cell Biol 26(2), 425-437. doi: 10.1128/MCB.26.2.425-437.2006.	1	Hematopoietic system disease
xb-art-890	16382135	DOID:4961	bone marrow disease	FALSE	FALSE	FALSE	FALSE	FALSE	FALSE	FALSE	FALSE	FALSE	FALSE	TRUE	FALSE	FALSE	FALSE	FALSE	FALSE	FALSE	FALSE	Sobeck, A., Stone, S., Costanzo, V., de Graaf, B., Reuter, T., de Winter, J., et al. (2006). Fanconi anemia proteins are required to prevent accumulation of replication-associated DNA double-strand breaks. Mol Cell Biol 26(2), 425-437. doi: 10.1128/MCB.26.2.425-437.2006.	1	Hematopoietic system disease
XB-ART-8843	11420310	DOID:0060319	cardiac arrest	FALSE	FALSE	FALSE	FALSE	FALSE	TRUE	FALSE	FALSE	FALSE	FALSE	FALSE	FALSE	FALSE	FALSE	FALSE	FALSE	FALSE	FALSE	Baroudi, G., Pouliot, V., Denjoy, I., Guicheney, P., Shrier, A., and Chahine, M. (2001). Novel mechanism for Brugada syndrome: defective surface localization of an SCN5A mutant (R1432G). Circ Res 88(12), E78-83.	1	Cardiovascular system disease
XB-ART-8843	11420310	DOID:0110218	Brugada syndrome 1	FALSE	FALSE	FALSE	FALSE	FALSE	TRUE	FALSE	FALSE	FALSE	FALSE	FALSE	FALSE	FALSE	FALSE	FALSE	FALSE	FALSE	FALSE	Baroudi, G., Pouliot, V., Denjoy, I., Guicheney, P., Shrier, A., and Chahine, M. (2001). Novel mechanism for Brugada syndrome: defective surface localization of an SCN5A mutant (R1432G). Circ Res 88(12), E78-83.	1	Cardiovascular system disease
XB-ART-876	16396913	DOID:11198	DiGeorge syndrome	FALSE	TRUE	FALSE	FALSE	FALSE	FALSE	FALSE	FALSE	FALSE	FALSE	FALSE	FALSE	FALSE	FALSE	FALSE	FALSE	FALSE	FALSE	Voigt, J., and Papalopulu, N. (2006). A dominant-negative form of the E3 ubiquitin ligase Cullin-1 disrupts the correct allocation of cell fate in the neural crest lineage. Development 133(3), 559-568. doi: 10.1242/dev.02201.	1	Genetic disease
XB-ART-875	16397066	DOID:0110231	cataract 1 multiple types	TRUE	FALSE	FALSE	FALSE	FALSE	FALSE	FALSE	FALSE	FALSE	FALSE	FALSE	FALSE	FALSE	FALSE	FALSE	FALSE	FALSE	FALSE	Arora, A., Minogue, P.J., Liu, X., Reddy, M.A., Ainsworth, J.R., Bhattacharya, S.S., et al. (2006). A novel GJA8 mutation is associated with autosomal dominant lamellar pulverulent cataract: further evidence for gap junction dysfunction in human cataract. J Med Genet 43(1), e2. doi: 10.1136/jmg.2005.034108.	1	Nervous system disease
XB-ART-875	16397066	DOID:0110231	cataract 1 multiple types	FALSE	FALSE	TRUE	FALSE	FALSE	FALSE	FALSE	FALSE	FALSE	FALSE	FALSE	FALSE	FALSE	FALSE	FALSE	FALSE	FALSE	FALSE	Arora, A., Minogue, P.J., Liu, X., Reddy, M.A., Ainsworth, J.R., Bhattacharya, S.S., et al. (2006). A novel GJA8 mutation is associated with autosomal dominant lamellar pulverulent cataract: further evidence for gap junction dysfunction in human cataract. J Med Genet 43(1), e2. doi: 10.1136/jmg.2005.034108.	1	Sensory system disease
XB-ART-861	16406325	DOID:0050557	congenital muscular dystrophy	FALSE	FALSE	FALSE	TRUE	FALSE	FALSE	FALSE	FALSE	FALSE	FALSE	FALSE	FALSE	FALSE	FALSE	FALSE	FALSE	FALSE	FALSE	Lunardi, A., Cremisi, F., and Dente, L. (2006). Dystroglycan is required for proper retinal layering. Dev Biol 290(2), 411-420. doi: 10.1016/j.ydbio.2005.11.044.	1	Musculoskeletal system disease
XB-ART-861	16406325	DOID:10629	microphthalmia	TRUE	FALSE	FALSE	FALSE	FALSE	FALSE	FALSE	FALSE	FALSE	FALSE	FALSE	FALSE	FALSE	FALSE	FALSE	FALSE	FALSE	FALSE	Lunardi, A., Cremisi, F., and Dente, L. (2006). Dystroglycan is required for proper retinal layering. Dev Biol 290(2), 411-420. doi: 10.1016/j.ydbio.2005.11.044.	1	Nervous system disease
XB-ART-861	16406325	DOID:10629	microphthalmia	FALSE	FALSE	TRUE	FALSE	FALSE	FALSE	FALSE	FALSE	FALSE	FALSE	FALSE	FALSE	FALSE	FALSE	FALSE	FALSE	FALSE	FALSE	Lunardi, A., Cremisi, F., and Dente, L. (2006). Dystroglycan is required for proper retinal layering. Dev Biol 290(2), 411-420. doi: 10.1016/j.ydbio.2005.11.044.	1	Sensory system disease
XB-ART-8511	11519730	DOID:0110152	Charcot-Marie-Tooth disease type 1B	TRUE	FALSE	FALSE	FALSE	FALSE	FALSE	FALSE	FALSE	FALSE	FALSE	FALSE	FALSE	FALSE	FALSE	FALSE	FALSE	FALSE	FALSE	Yoshida, M., and Colma, D.R. (2001). Rapid functional analysis in Xenopus oocytes of Po protein adhesive interactions. Neurochem Res 26(6), 703-712.	1	Nervous system disease
XB-ART-8511	11519730	DOID:0110152	Charcot-Marie-Tooth disease type 1B	FALSE	FALSE	FALSE	TRUE	FALSE	FALSE	FALSE	FALSE	FALSE	FALSE	FALSE	FALSE	FALSE	FALSE	FALSE	FALSE	FALSE	FALSE	Yoshida, M., and Colma, D.R. (2001). Rapid functional analysis in Xenopus oocytes of Po protein adhesive interactions. Neurochem Res 26(6), 703-712.	1	Musculoskeletal system disease
XB-ART-8401	11556485	DOID:10584	retinitis pigmentosa	TRUE	FALSE	FALSE	FALSE	FALSE	FALSE	FALSE	FALSE	FALSE	FALSE	FALSE	FALSE	FALSE	FALSE	FALSE	FALSE	FALSE	FALSE	Jablonski, M.M. (2001). Investigating the mechanisms of retinal degenerations with antisense oligonucleotides. Doc Ophthalmol 102(3), 179-196.	1	Nervous system disease
XB-ART-8401	11556485	DOID:10584	retinitis pigmentosa	FALSE	FALSE	TRUE	FALSE	FALSE	FALSE	FALSE	FALSE	FALSE	FALSE	FALSE	FALSE	FALSE	FALSE	FALSE	FALSE	FALSE	FALSE	Jablonski, M.M. (2001). Investigating the mechanisms of retinal degenerations with antisense oligonucleotides. Doc Ophthalmol 102(3), 179-196.	1	Sensory system disease
XB-ART-8378	11562478	DOID:0050788	proximal symphalangism	FALSE	TRUE	FALSE	FALSE	FALSE	FALSE	FALSE	FALSE	FALSE	FALSE	FALSE	FALSE	FALSE	FALSE	FALSE	FALSE	FALSE	FALSE	Marcelino, J., Sciortino, C.M., Romero, M.F., Ulatowski, L.M., Ballock, R.T., Economides, A.N., et al. (2001). Human disease-causing NOG missense mutations: effects on noggin secretion, dimer formation, and bone morphogenetic protein binding. Proc Natl Acad Sci U S A 98(20), 11353-11358. doi: 10.1073/pnas.201367598.	1	Genetic disease
XB-ART-82	16887815	DOID:0050450	Gitelman syndrome	FALSE	FALSE	FALSE	FALSE	FALSE	FALSE	TRUE	FALSE	FALSE	FALSE	FALSE	FALSE	FALSE	FALSE	FALSE	FALSE	FALSE	FALSE	Pacheco-Alvarez, D., Cristobal, P.S., Meade, P., Moreno, E., Vazquez, N., Munoz, E., et al. (2006). The Na+:Cl- cotransporter is activated and phosphorylated at the amino-terminal domain upon intracellular chloride depletion. J Biol Chem 281(39), 28755-28763. doi: 10.1074/jbc.M603773200.	1	Urinary system disease
XB-ART-82	16887815	DOID:10763	hypertension	FALSE	FALSE	FALSE	FALSE	FALSE	TRUE	FALSE	FALSE	FALSE	FALSE	FALSE	FALSE	FALSE	FALSE	FALSE	FALSE	FALSE	FALSE	Pacheco-Alvarez, D., Cristobal, P.S., Meade, P., Moreno, E., Vazquez, N., Munoz, E., et al. (2006). The Na+:Cl- cotransporter is activated and phosphorylated at the amino-terminal domain upon intracellular chloride depletion. J Biol Chem 281(39), 28755-28763. doi: 10.1074/jbc.M603773200.	1	Cardiovascular system disease
XB-ART-82	16887815	DOID:4479	pseudohypoaldosteronism	FALSE	FALSE	FALSE	FALSE	FALSE	FALSE	TRUE	FALSE	FALSE	FALSE	FALSE	FALSE	FALSE	FALSE	FALSE	FALSE	FALSE	FALSE	Pacheco-Alvarez, D., Cristobal, P.S., Meade, P., Moreno, E., Vazquez, N., Munoz, E., et al. (2006). The Na+:Cl- cotransporter is activated and phosphorylated at the amino-terminal domain upon intracellular chloride depletion. J Biol Chem 281(39), 28755-28763. doi: 10.1074/jbc.M603773200.	1	Urinary system disease
XB-ART-7959	11744158	DOID:10652	Alzheimer's disease	TRUE	FALSE	FALSE	FALSE	FALSE	FALSE	FALSE	FALSE	FALSE	FALSE	FALSE	FALSE	FALSE	FALSE	FALSE	FALSE	FALSE	FALSE	van den Hurk, W.H., Bloemen, M., and Martens, G.J. (2001). Expression of the gene encoding the beta-amyloid precursor protein APP in Xenopus laevis. Brain Res Mol Brain Res 97(1), 13-20.	1	Nervous system disease
XB-ART-7959	11744158	DOID:1289	neurodegenerative disease	TRUE	FALSE	FALSE	FALSE	FALSE	FALSE	FALSE	FALSE	FALSE	FALSE	FALSE	FALSE	FALSE	FALSE	FALSE	FALSE	FALSE	FALSE	van den Hurk, W.H., Bloemen, M., and Martens, G.J. (2001). Expression of the gene encoding the beta-amyloid precursor protein APP in Xenopus laevis. Brain Res Mol Brain Res 97(1), 13-20.	1	Nervous system disease
XB-ART-7959	11744158	DOID:3429	inclusion body myositis	FALSE	FALSE	FALSE	TRUE	FALSE	FALSE	FALSE	FALSE	FALSE	FALSE	FALSE	FALSE	FALSE	FALSE	FALSE	FALSE	FALSE	FALSE	van den Hurk, W.H., Bloemen, M., and Martens, G.J. (2001). Expression of the gene encoding the beta-amyloid precursor protein APP in Xenopus laevis. Brain Res Mol Brain Res 97(1), 13-20.	1	Musculoskeletal system disease
XB-ART-7959	11744158	DOID:936	brain disease	TRUE	FALSE	FALSE	FALSE	FALSE	FALSE	FALSE	FALSE	FALSE	FALSE	FALSE	FALSE	FALSE	FALSE	FALSE	FALSE	FALSE	FALSE	van den Hurk, W.H., Bloemen, M., and Martens, G.J. (2001). Expression of the gene encoding the beta-amyloid precursor protein APP in Xenopus laevis. Brain Res Mol Brain Res 97(1), 13-20.	1	Nervous system disease
XB-ART-7834	11784023	DOID:162	cancer	FALSE	FALSE	FALSE	FALSE	TRUE	FALSE	FALSE	FALSE	FALSE	FALSE	FALSE	FALSE	FALSE	FALSE	FALSE	FALSE	FALSE	FALSE	Zohn, I.E., and Brivanlou, A.H. (2001). Expression cloning of Xenopus Os4, an evolutionarily conserved gene, which induces mesoderm and dorsal axis. Dev Biol 239(1), 118-131. doi: 10.1006/dbio.2001.0420.	1	Cancer
XB-ART-770	16446421	DOID:10763	hypertension	FALSE	FALSE	FALSE	FALSE	FALSE	TRUE	FALSE	FALSE	FALSE	FALSE	FALSE	FALSE	FALSE	FALSE	FALSE	FALSE	FALSE	FALSE	de Los Heros, P., Kahle, K.T., Rinehart, J., Bobadilla, N.A., Vazquez, N., San Cristobal, P., et al. (2006). WNK3 bypasses the tonicity requirement for K-Cl cotransporter activation via a phosphatase-dependent pathway. Proc Natl Acad Sci U S A 103(6), 1976-1981. doi: 10.1073/pnas.0510947103.	1	Cardiovascular system disease
XB-ART-7659	11840327	DOID:1240	leukemia	FALSE	FALSE	FALSE	FALSE	TRUE	FALSE	FALSE	FALSE	FALSE	FALSE	FALSE	FALSE	FALSE	FALSE	FALSE	FALSE	FALSE	FALSE	Davis, R.L., and Turner, D.L. (2001). Vertebrate hairy and Enhancer of split related proteins: transcriptional repressors regulating cellular differentiation and embryonic patterning. Oncogene 20(58), 8342-8357. doi: 10.1038/sj.onc.1205094.	1	Cancer
XB-ART-7659	11840327	DOID:1240	leukemia	FALSE	FALSE	FALSE	FALSE	FALSE	FALSE	FALSE	FALSE	FALSE	FALSE	TRUE	FALSE	FALSE	FALSE	FALSE	FALSE	FALSE	FALSE	Davis, R.L., and Turner, D.L. (2001). Vertebrate hairy and Enhancer of split related proteins: transcriptional repressors regulating cellular differentiation and embryonic patterning. Oncogene 20(58), 8342-8357. doi: 10.1038/sj.onc.1205094.	1	Hematopoietic system disease
XB-ART-7659	11840327	DOID:1240	leukemia	FALSE	FALSE	FALSE	FALSE	FALSE	FALSE	FALSE	FALSE	FALSE	FALSE	FALSE	FALSE	FALSE	TRUE	FALSE	FALSE	FALSE	FALSE	Davis, R.L., and Turner, D.L. (2001). Vertebrate hairy and Enhancer of split related proteins: transcriptional repressors regulating cellular differentiation and embryonic patterning. Oncogene 20(58), 8342-8357. doi: 10.1038/sj.onc.1205094.	1	Immune system disease
XB-ART-7659	11840327	DOID:12603	acute leukemia	FALSE	FALSE	FALSE	FALSE	TRUE	FALSE	FALSE	FALSE	FALSE	FALSE	FALSE	FALSE	FALSE	FALSE	FALSE	FALSE	FALSE	FALSE	Davis, R.L., and Turner, D.L. (2001). Vertebrate hairy and Enhancer of split related proteins: transcriptional repressors regulating cellular differentiation and embryonic patterning. Oncogene 20(58), 8342-8357. doi: 10.1038/sj.onc.1205094.	1	Cancer
XB-ART-7659	11840327	DOID:12603	acute leukemia	FALSE	FALSE	FALSE	FALSE	FALSE	FALSE	FALSE	FALSE	FALSE	FALSE	TRUE	FALSE	FALSE	FALSE	FALSE	FALSE	FALSE	FALSE	Davis, R.L., and Turner, D.L. (2001). Vertebrate hairy and Enhancer of split related proteins: transcriptional repressors regulating cellular differentiation and embryonic patterning. Oncogene 20(58), 8342-8357. doi: 10.1038/sj.onc.1205094.	1	Hematopoietic system disease
XB-ART-7659	11840327	DOID:12603	acute leukemia	FALSE	FALSE	FALSE	FALSE	FALSE	FALSE	FALSE	FALSE	FALSE	FALSE	FALSE	FALSE	FALSE	TRUE	FALSE	FALSE	FALSE	FALSE	Davis, R.L., and Turner, D.L. (2001). Vertebrate hairy and Enhancer of split related proteins: transcriptional repressors regulating cellular differentiation and embryonic patterning. Oncogene 20(58), 8342-8357. doi: 10.1038/sj.onc.1205094.	1	Immune system disease
XB-ART-7659	11840327	DOID:715	T-cell leukemia	FALSE	FALSE	FALSE	FALSE	TRUE	FALSE	FALSE	FALSE	FALSE	FALSE	FALSE	FALSE	FALSE	FALSE	FALSE	FALSE	FALSE	FALSE	Davis, R.L., and Turner, D.L. (2001). Vertebrate hairy and Enhancer of split related proteins: transcriptional repressors regulating cellular differentiation and embryonic patterning. Oncogene 20(58), 8342-8357. doi: 10.1038/sj.onc.1205094.	1	Cancer
XB-ART-7659	11840327	DOID:715	T-cell leukemia	FALSE	FALSE	FALSE	FALSE	FALSE	FALSE	FALSE	FALSE	FALSE	FALSE	TRUE	FALSE	FALSE	FALSE	FALSE	FALSE	FALSE	FALSE	Davis, R.L., and Turner, D.L. (2001). Vertebrate hairy and Enhancer of split related proteins: transcriptional repressors regulating cellular differentiation and embryonic patterning. Oncogene 20(58), 8342-8357. doi: 10.1038/sj.onc.1205094.	1	Hematopoietic system disease
XB-ART-7659	11840327	DOID:715	T-cell leukemia	FALSE	FALSE	FALSE	FALSE	FALSE	FALSE	FALSE	FALSE	FALSE	FALSE	FALSE	FALSE	FALSE	TRUE	FALSE	FALSE	FALSE	FALSE	Davis, R.L., and Turner, D.L. (2001). Vertebrate hairy and Enhancer of split related proteins: transcriptional repressors regulating cellular differentiation and embryonic patterning. Oncogene 20(58), 8342-8357. doi: 10.1038/sj.onc.1205094.	1	Immune system disease
XB-ART-7468	11898849	DOID:14692	Smith-Lemli-Opitz syndrome	FALSE	FALSE	FALSE	FALSE	FALSE	FALSE	FALSE	TRUE	FALSE	FALSE	FALSE	FALSE	FALSE	FALSE	FALSE	FALSE	FALSE	FALSE	Harmon, E.B., Ko, A.H., and Kim, S.K. (2002). Hedgehog signaling in gastrointestinal development and disease. Curr Mol Med 2(1), 67-82.	1	Disease of metabolism
XB-ART-7468	11898849	DOID:14761	Greig cephalopolysyndactyly syndrome	FALSE	FALSE	FALSE	TRUE	FALSE	FALSE	FALSE	FALSE	FALSE	FALSE	FALSE	FALSE	FALSE	FALSE	FALSE	FALSE	FALSE	FALSE	Harmon, E.B., Ko, A.H., and Kim, S.K. (2002). Hedgehog signaling in gastrointestinal development and disease. Curr Mol Med 2(1), 67-82.	1	Musculoskeletal system disease
XB-ART-7300	11959122	DOID:10652	Alzheimer's disease	TRUE	FALSE	FALSE	FALSE	FALSE	FALSE	FALSE	FALSE	FALSE	FALSE	FALSE	FALSE	FALSE	FALSE	FALSE	FALSE	FALSE	FALSE	Delobel, P., Flament, S., Hamdane, M., Delacourte, A., Vilain, J.P., and Buee, L. (2002). Modelling Alzheimer-specific abnormal Tau phosphorylation independently of GSK3beta and PKA kinase activities. FEBS Lett 516(1-3), 151-155.	1	Nervous system disease
XB-ART-7300	11959122	DOID:1289	neurodegenerative disease	TRUE	FALSE	FALSE	FALSE	FALSE	FALSE	FALSE	FALSE	FALSE	FALSE	FALSE	FALSE	FALSE	FALSE	FALSE	FALSE	FALSE	FALSE	Delobel, P., Flament, S., Hamdane, M., Delacourte, A., Vilain, J.P., and Buee, L. (2002). Modelling Alzheimer-specific abnormal Tau phosphorylation independently of GSK3beta and PKA kinase activities. FEBS Lett 516(1-3), 151-155.	1	Nervous system disease
XB-ART-7300	11959122	DOID:936	brain disease	TRUE	FALSE	FALSE	FALSE	FALSE	FALSE	FALSE	FALSE	FALSE	FALSE	FALSE	FALSE	FALSE	FALSE	FALSE	FALSE	FALSE	FALSE	Delobel, P., Flament, S., Hamdane, M., Delacourte, A., Vilain, J.P., and Buee, L. (2002). Modelling Alzheimer-specific abnormal Tau phosphorylation independently of GSK3beta and PKA kinase activities. FEBS Lett 516(1-3), 151-155.	1	Nervous system disease
XB-ART-7285	11960004	DOID:3763	hermaphroditism	FALSE	FALSE	FALSE	FALSE	FALSE	FALSE	FALSE	FALSE	FALSE	FALSE	FALSE	FALSE	TRUE	FALSE	FALSE	FALSE	FALSE	FALSE	Hayes, T.B., Collins, A., Lee, M., Mendoza, M., Noriega, N., Stuart, A.A., et al. (2002). Hermaphroditic, demasculinized frogs after exposure to the herbicide atrazine at low ecologically relevant doses. Proc Natl Acad Sci U S A 99(8), 5476-5480. doi: 10.1073/pnas.082121499.	1	Endocrine system disease
XB-ART-7098	12032359	DOID:0050434	Andersen-Tawil syndrome	FALSE	FALSE	FALSE	FALSE	FALSE	TRUE	FALSE	FALSE	FALSE	FALSE	FALSE	FALSE	FALSE	FALSE	FALSE	FALSE	FALSE	FALSE	Preisig-Muller, R., Schlichthorl, G., Goerge, T., Heinen, S., Bruggemann, A., Rajan, S., et al. (2002). Heteromerization of Kir2.x potassium channels contributes to the phenotype of Andersen's syndrome. Proc Natl Acad Sci U S A 99(11), 7774-7779. doi: 10.1073/pnas.102609499.	1	Cardiovascular system disease
XB-ART-7098	12032359	DOID:0060249	scoliosis	FALSE	FALSE	FALSE	TRUE	FALSE	FALSE	FALSE	FALSE	FALSE	FALSE	FALSE	FALSE	FALSE	FALSE	FALSE	FALSE	FALSE	FALSE	Preisig-Muller, R., Schlichthorl, G., Goerge, T., Heinen, S., Bruggemann, A., Rajan, S., et al. (2002). Heteromerization of Kir2.x potassium channels contributes to the phenotype of Andersen's syndrome. Proc Natl Acad Sci U S A 99(11), 7774-7779. doi: 10.1073/pnas.102609499.	1	Musculoskeletal system disease
XB-ART-7076	12039972	DOID:0050450	Gitelman syndrome	FALSE	FALSE	FALSE	FALSE	FALSE	FALSE	TRUE	FALSE	FALSE	FALSE	FALSE	FALSE	FALSE	FALSE	FALSE	FALSE	FALSE	FALSE	De Jong, J.C., Van Der Vliet, W.A., Van Den Heuvel, L.P., Willems, P.H., Knoers, N.V., and Bindels, R.J. (2002). Functional expression of mutations in the human NaCl cotransporter: evidence for impaired routing mechanisms in Gitelman's syndrome. J Am Soc Nephrol 13(6), 1442-1448.	1	Urinary system disease
XB-ART-7076	12039972	DOID:447	renal tubular transport disease	FALSE	FALSE	FALSE	FALSE	FALSE	FALSE	TRUE	FALSE	FALSE	FALSE	FALSE	FALSE	FALSE	FALSE	FALSE	FALSE	FALSE	FALSE	De Jong, J.C., Van Der Vliet, W.A., Van Den Heuvel, L.P., Willems, P.H., Knoers, N.V., and Bindels, R.J. (2002). Functional expression of mutations in the human NaCl cotransporter: evidence for impaired routing mechanisms in Gitelman's syndrome. J Am Soc Nephrol 13(6), 1442-1448.	1	Urinary system disease
XB-ART-7050	12050236	DOID:12387	nephrogenic diabetes insipidus	FALSE	FALSE	FALSE	FALSE	FALSE	FALSE	TRUE	FALSE	FALSE	FALSE	FALSE	FALSE	FALSE	FALSE	FALSE	FALSE	FALSE	FALSE	Lin, S.H., Bichet, D.G., Sasaki, S., Kuwahara, M., Arthus, M.F., Lonergan, M., et al. (2002). Two novel aquaporin-2 mutations responsible for congenital nephrogenic diabetes insipidus in Chinese families. J Clin Endocrinol Metab 87(6), 2694-2700. doi: 10.1210/jcem.87.6.8617.	1	Urinary system disease
XB-ART-6914	12097483	DOID:3328	temporal lobe epilepsy	TRUE	FALSE	FALSE	FALSE	FALSE	FALSE	FALSE	FALSE	FALSE	FALSE	FALSE	FALSE	FALSE	FALSE	FALSE	FALSE	FALSE	FALSE	Bianchi, M.T., Song, L., Zhang, H., and Macdonald, R.L. (2002). Two different mechanisms of disinhibition produced by GABAA receptor mutations linked to epilepsy in humans. J Neurosci 22(13), 5321-5327. doi: 20026554.	1	Nervous system disease
XB-ART-6725	12169101	DOID:0060695	hyperekplexia	TRUE	FALSE	FALSE	FALSE	FALSE	FALSE	FALSE	FALSE	FALSE	FALSE	FALSE	FALSE	FALSE	FALSE	FALSE	FALSE	FALSE	FALSE	Rea, R., Tijssen, M.A., Herd, C., Frants, R.R., and Kullmann, D.M. (2002). Functional characterization of compound heterozygosity for GlyRalpha1 mutations in the startle disease hyperekplexia. Eur J Neurosci 16(2), 186-196.	1	Nervous system disease
XB-ART-6717	12172548	DOID:0050535	exudative vitreoretinopathy	TRUE	FALSE	FALSE	FALSE	FALSE	FALSE	FALSE	FALSE	FALSE	FALSE	FALSE	FALSE	FALSE	FALSE	FALSE	FALSE	FALSE	FALSE	Robitaille, J., MacDonald, M.L., Kaykas, A., Sheldahl, L.C., Zeisler, J., Dube, M.P., et al. (2002). Mutant frizzled-4 disrupts retinal angiogenesis in familial exudative vitreoretinopathy. Nat Genet 32(2), 326-330. doi: 10.1038/ng957.	1	Nervous system disease
XB-ART-6717	12172548	DOID:0050535	exudative vitreoretinopathy	FALSE	FALSE	TRUE	FALSE	FALSE	FALSE	FALSE	FALSE	FALSE	FALSE	FALSE	FALSE	FALSE	FALSE	FALSE	FALSE	FALSE	FALSE	Robitaille, J., MacDonald, M.L., Kaykas, A., Sheldahl, L.C., Zeisler, J., Dube, M.P., et al. (2002). Mutant frizzled-4 disrupts retinal angiogenesis in familial exudative vitreoretinopathy. Nat Genet 32(2), 326-330. doi: 10.1038/ng957.	1	Sensory system disease
XB-ART-6521	12238947	DOID:12365	malaria	FALSE	FALSE	FALSE	FALSE	FALSE	FALSE	FALSE	FALSE	FALSE	FALSE	FALSE	FALSE	FALSE	FALSE	TRUE	FALSE	FALSE	FALSE	Joet, T., Holterman, L., Stedman, T.T., Kocken, C.H., Van Der Wel, A., Thomas, A.W., et al. (2002). Comparative characterization of hexose transporters of Plasmodium knowlesi, Plasmodium yoelii and Toxoplasma gondii highlights functional differences within the apicomplexan family. Biochem J 368(Pt 3), 923-929. doi: 10.1042/bj20021189.	1	Disease by infectious agent
XB-ART-6521	12238947	DOID:14067	Plasmodium falciparum malaria	FALSE	FALSE	FALSE	FALSE	FALSE	FALSE	FALSE	FALSE	FALSE	FALSE	FALSE	FALSE	FALSE	FALSE	TRUE	FALSE	FALSE	FALSE	Joet, T., Holterman, L., Stedman, T.T., Kocken, C.H., Van Der Wel, A., Thomas, A.W., et al. (2002). Comparative characterization of hexose transporters of Plasmodium knowlesi, Plasmodium yoelii and Toxoplasma gondii highlights functional differences within the apicomplexan family. Biochem J 368(Pt 3), 923-929. doi: 10.1042/bj20021189.	1	Disease by infectious agent
XB-ART-6521	12238947	DOID:9965	toxoplasmosis	FALSE	FALSE	FALSE	FALSE	FALSE	FALSE	FALSE	FALSE	FALSE	FALSE	FALSE	FALSE	FALSE	FALSE	TRUE	FALSE	FALSE	FALSE	Joet, T., Holterman, L., Stedman, T.T., Kocken, C.H., Van Der Wel, A., Thomas, A.W., et al. (2002). Comparative characterization of hexose transporters of Plasmodium knowlesi, Plasmodium yoelii and Toxoplasma gondii highlights functional differences within the apicomplexan family. Biochem J 368(Pt 3), 923-929. doi: 10.1042/bj20021189.	1	Disease by infectious agent
XB-ART-6429	12368912	DOID:0060600	hereditary motor and sensory neuropathy with agenesis of the corpus callosum	TRUE	FALSE	FALSE	FALSE	FALSE	FALSE	FALSE	FALSE	FALSE	FALSE	FALSE	FALSE	FALSE	FALSE	FALSE	FALSE	FALSE	FALSE	Howard, H.C., Mount, D.B., Rochefort, D., Byun, N., Dupre, N., Lu, J., et al. (2002). The K-Cl cotransporter KCC3 is mutant in a severe peripheral neuropathy associated with agenesis of the corpus callosum. Nat Genet 32(3), 384-392. doi: 10.1038/ng1002.	1	Nervous system disease
XB-ART-6337	12393794	DOID:0110527	autosomal recessive nonsyndromic deafness 8	TRUE	FALSE	FALSE	FALSE	FALSE	FALSE	FALSE	FALSE	FALSE	FALSE	FALSE	FALSE	FALSE	FALSE	FALSE	FALSE	FALSE	FALSE	Guipponi, M., Vuagniaux, G., Wattenhofer, M., Shibuya, K., Vazquez, M., Dougherty, L., et al. (2002). The transmembrane serine protease (TMPRSS3) mutated in deafness DFNB8/10 activates the epithelial sodium channel (ENaC) in vitro. Hum Mol Genet 11(23), 2829-2836.	1	Nervous system disease
XB-ART-6337	12393794	DOID:0110527	autosomal recessive nonsyndromic deafness 8	FALSE	FALSE	TRUE	FALSE	FALSE	FALSE	FALSE	FALSE	FALSE	FALSE	FALSE	FALSE	FALSE	FALSE	FALSE	FALSE	FALSE	FALSE	Guipponi, M., Vuagniaux, G., Wattenhofer, M., Shibuya, K., Vazquez, M., Dougherty, L., et al. (2002). The transmembrane serine protease (TMPRSS3) mutated in deafness DFNB8/10 activates the epithelial sodium channel (ENaC) in vitro. Hum Mol Genet 11(23), 2829-2836.	1	Sensory system disease
XB-ART-6220	12423251	DOID:10652	Alzheimer's disease	TRUE	FALSE	FALSE	FALSE	FALSE	FALSE	FALSE	FALSE	FALSE	FALSE	FALSE	FALSE	FALSE	FALSE	FALSE	FALSE	FALSE	FALSE	Delobel, P., Flament, S., Hamdane, M., Mailliot, C., Sambo, A.V., Begard, S., et al. (2002). Abnormal Tau phosphorylation of the Alzheimer-type also occurs during mitosis. J Neurochem 83(2), 412-420.	1	Nervous system disease
XB-ART-6220	12423251	DOID:1289	neurodegenerative disease	TRUE	FALSE	FALSE	FALSE	FALSE	FALSE	FALSE	FALSE	FALSE	FALSE	FALSE	FALSE	FALSE	FALSE	FALSE	FALSE	FALSE	FALSE	Delobel, P., Flament, S., Hamdane, M., Mailliot, C., Sambo, A.V., Begard, S., et al. (2002). Abnormal Tau phosphorylation of the Alzheimer-type also occurs during mitosis. J Neurochem 83(2), 412-420.	1	Nervous system disease
XB-ART-6016	12490158	DOID:11726	Emery-Dreifuss muscular dystrophy	FALSE	FALSE	FALSE	TRUE	FALSE	FALSE	FALSE	FALSE	FALSE	FALSE	FALSE	FALSE	FALSE	FALSE	FALSE	FALSE	FALSE	FALSE	Dreger, C.K., Konig, A.R., Spring, H., Lichter, P., and Herrmann, H. (2002). Investigation of nuclear architecture with a domain-presenting expression system. J Struct Biol 140(1-3), 100-115.	1	Musculoskeletal system disease
XB-ART-6016	12490158	DOID:9631	Pelger-Huet anomaly	FALSE	TRUE	FALSE	FALSE	FALSE	FALSE	FALSE	FALSE	FALSE	FALSE	FALSE	FALSE	FALSE	FALSE	FALSE	FALSE	FALSE	FALSE	Dreger, C.K., Konig, A.R., Spring, H., Lichter, P., and Herrmann, H. (2002). Investigation of nuclear architecture with a domain-presenting expression system. J Struct Biol 140(1-3), 100-115.	1	Genetic disease
XB-ART-595	16530041	DOID:10763	hypertension	FALSE	FALSE	FALSE	FALSE	FALSE	TRUE	FALSE	FALSE	FALSE	FALSE	FALSE	FALSE	FALSE	FALSE	FALSE	FALSE	FALSE	FALSE	Zacchigna, L., Vecchione, C., Notte, A., Cordenonsi, M., Dupont, S., Maretto, S., et al. (2006). Emilin1 links TGF-beta maturation to blood pressure homeostasis. Cell 124(5), 929-942. doi: 10.1016/j.cell.2005.12.035.	1	Cardiovascular system disease
XB-ART-588	16531414	DOID:0080071	pseudo-Hurler polydystrophy	FALSE	FALSE	FALSE	FALSE	FALSE	FALSE	FALSE	TRUE	FALSE	FALSE	FALSE	FALSE	FALSE	FALSE	FALSE	FALSE	FALSE	FALSE	Cruciat, C.M., Hassler, C., and Niehrs, C. (2006). The MRH protein Erlectin is a member of the endoplasmic reticulum synexpression group and functions in N-glycan recognition. J Biol Chem 281(18), 12986-12993. doi: 10.1074/jbc.M511872200.	1	Disease of metabolism
XB-ART-5822	12558173	DOID:5223	infertility	FALSE	FALSE	FALSE	FALSE	FALSE	FALSE	FALSE	FALSE	FALSE	FALSE	FALSE	FALSE	FALSE	FALSE	FALSE	TRUE	FALSE	FALSE	Carr, J.A., Gentles, A., Smith, E.E., Goleman, W.L., Urquidi, L.J., Thuett, K., et al. (2003). Response of larval Xenopus laevis to atrazine: assessment of growth, metamorphosis, and gonadal and laryngeal morphology. Environ Toxicol Chem 22(2), 396-405.	1	Reproductive system disease
XB-ART-5802	12562926	DOID:10652	Alzheimer's disease	TRUE	FALSE	FALSE	FALSE	FALSE	FALSE	FALSE	FALSE	FALSE	FALSE	FALSE	FALSE	FALSE	FALSE	FALSE	FALSE	FALSE	FALSE	Grassi, F., Palma, E., Tonini, R., Amici, M., Ballivet, M., and Eusebi, F. (2003). Amyloid beta(1-42) peptide alters the gating of human and mouse alpha-bungarotoxin-sensitive nicotinic receptors. J Physiol 547(Pt 1), 147-157. doi: 10.1113/jphysiol.2002.035436.	1	Nervous system disease
XB-ART-5802	12562926	DOID:1289	neurodegenerative disease	TRUE	FALSE	FALSE	FALSE	FALSE	FALSE	FALSE	FALSE	FALSE	FALSE	FALSE	FALSE	FALSE	FALSE	FALSE	FALSE	FALSE	FALSE	Grassi, F., Palma, E., Tonini, R., Amici, M., Ballivet, M., and Eusebi, F. (2003). Amyloid beta(1-42) peptide alters the gating of human and mouse alpha-bungarotoxin-sensitive nicotinic receptors. J Physiol 547(Pt 1), 147-157. doi: 10.1113/jphysiol.2002.035436.	1	Nervous system disease
XB-ART-5802	12562926	DOID:3429	inclusion body myositis	FALSE	FALSE	FALSE	TRUE	FALSE	FALSE	FALSE	FALSE	FALSE	FALSE	FALSE	FALSE	FALSE	FALSE	FALSE	FALSE	FALSE	FALSE	Grassi, F., Palma, E., Tonini, R., Amici, M., Ballivet, M., and Eusebi, F. (2003). Amyloid beta(1-42) peptide alters the gating of human and mouse alpha-bungarotoxin-sensitive nicotinic receptors. J Physiol 547(Pt 1), 147-157. doi: 10.1113/jphysiol.2002.035436.	1	Musculoskeletal system disease
XB-ART-5554	12651923	DOID:0060296	congenital secretory chloride diarrhea 1	FALSE	FALSE	FALSE	FALSE	FALSE	FALSE	FALSE	FALSE	FALSE	FALSE	FALSE	TRUE	FALSE	FALSE	FALSE	FALSE	FALSE	FALSE	Chernova, M.N., Jiang, L., Shmukler, B.E., Schweinfest, C.W., Blanco, P., Freedman, S.D., et al. (2003). Acute regulation of the SLC26A3 congenital chloride diarrhoea anion exchanger (DRA) expressed in Xenopus oocytes. J Physiol 549(Pt 1), 3-19. doi: 10.1113/jphysiol.2003.039818.	1	Gastrointestinal system disease
XB-ART-5554	12651923	DOID:1485	cystic fibrosis	FALSE	TRUE	FALSE	FALSE	FALSE	FALSE	FALSE	FALSE	FALSE	FALSE	FALSE	FALSE	FALSE	FALSE	FALSE	FALSE	FALSE	FALSE	Chernova, M.N., Jiang, L., Shmukler, B.E., Schweinfest, C.W., Blanco, P., Freedman, S.D., et al. (2003). Acute regulation of the SLC26A3 congenital chloride diarrhoea anion exchanger (DRA) expressed in Xenopus oocytes. J Physiol 549(Pt 1), 3-19. doi: 10.1113/jphysiol.2003.039818.	1	Genetic disease
XB-ART-54953	29364875	DOID:1339	Diamond-Blackfan anemia	FALSE	FALSE	FALSE	FALSE	FALSE	FALSE	FALSE	FALSE	FALSE	FALSE	TRUE	FALSE	FALSE	FALSE	FALSE	FALSE	FALSE	FALSE	Calo, E., Gu, B., Bowen, M.E., Aryan, F., Zalc, A., Liang, J., et al. (2018). Tissue-selective effects of nucleolar stress and rDNA damage in developmental disorders. Nature 554(7690), 112-117. doi: 10.1038/nature25449.	1	Hematopoietic system disease
XB-ART-54953	29364875	DOID:2908	Treacher Collins syndrome	FALSE	TRUE	FALSE	FALSE	FALSE	FALSE	FALSE	FALSE	FALSE	FALSE	FALSE	FALSE	FALSE	FALSE	FALSE	FALSE	FALSE	FALSE	Calo, E., Gu, B., Bowen, M.E., Aryan, F., Zalc, A., Liang, J., et al. (2018). Tissue-selective effects of nucleolar stress and rDNA damage in developmental disorders. Nature 554(7690), 112-117. doi: 10.1038/nature25449.	1	Genetic disease
XB-ART-5485	12676614	DOID:14096	infertility due to extratesticular cause	FALSE	FALSE	FALSE	FALSE	FALSE	FALSE	FALSE	FALSE	FALSE	FALSE	FALSE	FALSE	FALSE	FALSE	FALSE	TRUE	FALSE	FALSE	Qin, Z.F., Zhou, J.M., Chu, S.G., and Xu, X.B. (2003). Effects of Chinese domestic polychlorinated biphenyls (PCBs) on gonadal differentiation in Xenopus laevis. Environ Health Perspect 111(4), 553-556.	1	Reproductive system disease
XB-ART-54741	29599640	DOID:1826	epilepsy	TRUE	FALSE	FALSE	FALSE	FALSE	FALSE	FALSE	FALSE	FALSE	FALSE	FALSE	FALSE	FALSE	FALSE	FALSE	FALSE	FALSE	FALSE	Zhang, J., Mohamad, F.H., Wong, J.H., Mohamad, H., Ismail, A.H., Mohamed Yusoff, A.A., et al. (2018). The Effects of 4-Hydroxybenzoic Acid Identified from Bamboo (Dendrocalamus asper) Shoots on Kv1.4 Channel. Malays J Med Sci 25(1), 101-113. doi: 10.21315/mjms2018.25.1.12.	1	Nervous system disease
XB-ART-54726	29582136	DOID:0060319	cardiac arrest	FALSE	FALSE	FALSE	FALSE	FALSE	TRUE	FALSE	FALSE	FALSE	FALSE	FALSE	FALSE	FALSE	FALSE	FALSE	FALSE	FALSE	FALSE	Chua, H.C., Servatius, H., Asatryan, B., Schaller, A., Rieubland, C., Noti, F., et al. (2018). Unexplained cardiac arrest: a tale of conflicting interpretations of KCNQ1 genetic test results. Clin Res Cardiol. doi: 10.1007/s00392-018-1233-3.	1	Cardiovascular system disease
XB-ART-54726	29582136	DOID:2843	long QT syndrome	FALSE	FALSE	FALSE	FALSE	FALSE	TRUE	FALSE	FALSE	FALSE	FALSE	FALSE	FALSE	FALSE	FALSE	FALSE	FALSE	FALSE	FALSE	Chua, H.C., Servatius, H., Asatryan, B., Schaller, A., Rieubland, C., Noti, F., et al. (2018). Unexplained cardiac arrest: a tale of conflicting interpretations of KCNQ1 genetic test results. Clin Res Cardiol. doi: 10.1007/s00392-018-1233-3.	1	Cardiovascular system disease
XB-ART-54694	29588962	DOID:1826	epilepsy	TRUE	FALSE	FALSE	FALSE	FALSE	FALSE	FALSE	FALSE	FALSE	FALSE	FALSE	FALSE	FALSE	FALSE	FALSE	FALSE	FALSE	FALSE	Becker, F., Reid, C.A., Hallmann, K., Tae, H.S., Phillips, A.M., Teodorescu, G., et al. (2017). Functional variants in HCN4 and CACNA1H may contribute to genetic generalized epilepsy. Epilepsia Open 2(3), 334-342. doi: 10.1002/epi4.12068.	1	Nervous system disease
XB-ART-54688	29566083	DOID:14330	Parkinson's disease	TRUE	FALSE	FALSE	FALSE	FALSE	FALSE	FALSE	FALSE	FALSE	FALSE	FALSE	FALSE	FALSE	FALSE	FALSE	FALSE	FALSE	FALSE	Stahl, K., Rahmani, S., Prydz, A., Skauli, N., MacAulay, N., Mylonakou, M.N., et al. (2018). Targeted deletion of the aquaglyceroporin AQP9 is protective in a mouse model of Parkinson's disease. PLoS One 13(3), e0194896. doi: 10.1371/journal.pone.0194896.	1	Nervous system disease
XB-ART-54554	29432577	DOID:0050834	CHARGE syndrome	FALSE	FALSE	FALSE	FALSE	FALSE	FALSE	FALSE	FALSE	FALSE	FALSE	FALSE	FALSE	FALSE	FALSE	FALSE	FALSE	FALSE	FALSE	Ufartes, R., Schwenty-Lara, J., Freese, L., Neuhofer, C., Moller, J., Wehner, P., et al. (2018). Sema3a plays a role in the pathogenesis of CHARGE syndrome. Hum Mol Genet 27(8), 1343-1352. doi: 10.1093/hmg/ddy045.	0	Syndrome
XB-ART-54521	29386226	DOID:14452	hypokalemic periodic paralysis	FALSE	FALSE	FALSE	FALSE	FALSE	FALSE	FALSE	TRUE	FALSE	FALSE	FALSE	FALSE	FALSE	FALSE	FALSE	FALSE	FALSE	FALSE	Wu, F., Quinonez, M., DiFranco, M., and Cannon, S.C. (2018). Stac3 enhances expression of human CaV1.1 in Xenopus oocytes and reveals gating pore currents in HypoPP mutant channels. J Gen Physiol. doi: 10.1085/jgp.201711962.	1	Disease of metabolism
XB-ART-54467	29257953	DOID:758	situs inversus	FALSE	FALSE	FALSE	FALSE	FALSE	FALSE	FALSE	FALSE	FALSE	TRUE	FALSE	FALSE	FALSE	FALSE	FALSE	FALSE	FALSE	FALSE	Sigg, M.A., Menchen, T., Lee, C., Johnson, J., Jungnickel, M.K., Choksi, S.P., et al. (2017). Evolutionary Proteomics Uncovers Ancient Associations of Cilia with Signaling Pathways. Dev Cell 43(6), 744-762.e711. doi: 10.1016/j.devcel.2017.11.014.	1	Physical disorder
XB-ART-54461	29339483	DOID:0090007	immunodeficiency-centromeric instability-facial anomalies syndrome	FALSE	TRUE	FALSE	FALSE	FALSE	FALSE	FALSE	FALSE	FALSE	FALSE	FALSE	FALSE	FALSE	FALSE	FALSE	FALSE	FALSE	FALSE	Jenness, C., Giunta, S., Muller, M.M., Kimura, H., Muir, T.W., and Funabiki, H. (2018). HELLS and CDCA7 comprise a bipartite nucleosome remodeling complex defective in ICF syndrome. Proc Natl Acad Sci U S A 115(5), E876-e885. doi: 10.1073/pnas.1717509115.	1	Genetic disease
XB-ART-54394	29277616	DOID:3614	Kallmann syndrome	FALSE	FALSE	FALSE	FALSE	FALSE	FALSE	FALSE	FALSE	FALSE	FALSE	FALSE	FALSE	TRUE	FALSE	FALSE	FALSE	FALSE	FALSE	Bae, C.J., Hong, C.S., and Saint-Jeannet, J.P. (2018). Anosmin-1 is essential for neural crest and cranial placodes formation in Xenopus. Biochem Biophys Res Commun 495(3), 2257-2263. doi: 10.1016/j.bbrc.2017.12.127.	1	Endocrine system disease
XB-ART-54371	28923975	DOID:1056	oculocerebrorenal syndrome	FALSE	TRUE	FALSE	FALSE	FALSE	FALSE	FALSE	FALSE	FALSE	FALSE	FALSE	FALSE	FALSE	FALSE	FALSE	FALSE	FALSE	FALSE	Daste, F., Walrant, A., Holst, M.R., Gadsby, J.R., Mason, J., Lee, J.E., et al. (2017). Control of actin polymerization via the coincidence of phosphoinositides and high membrane curvature. J Cell Biol 216(11), 3745-3765. doi: 10.1083/jcb.201704061.	1	Genetic disease
XB-ART-54329	29196579	DOID:0050709	Ohtahara syndrome	TRUE	FALSE	FALSE	FALSE	FALSE	FALSE	FALSE	FALSE	FALSE	FALSE	FALSE	FALSE	FALSE	FALSE	FALSE	FALSE	FALSE	FALSE	McTague, A., Nair, U., Malhotra, S., Meyer, E., Trump, N., Gazina, E.V., et al. (2018). Clinical and molecular characterization of KCNT1-related severe early-onset epilepsy. Neurology 90(1), e55-e66. doi: 10.1212/WNL.0000000000004762.	1	Nervous system disease
XB-ART-54329	29196579	DOID:0060686	autosomal dominant nocturnal frontal lobe epilepsy 5	TRUE	FALSE	FALSE	FALSE	FALSE	FALSE	FALSE	FALSE	FALSE	FALSE	FALSE	FALSE	FALSE	FALSE	FALSE	FALSE	FALSE	FALSE	McTague, A., Nair, U., Malhotra, S., Meyer, E., Trump, N., Gazina, E.V., et al. (2018). Clinical and molecular characterization of KCNT1-related severe early-onset epilepsy. Neurology 90(1), e55-e66. doi: 10.1212/WNL.0000000000004762.	1	Nervous system disease
XB-ART-54329	29196579	DOID:1826	epilepsy	TRUE	FALSE	FALSE	FALSE	FALSE	FALSE	FALSE	FALSE	FALSE	FALSE	FALSE	FALSE	FALSE	FALSE	FALSE	FALSE	FALSE	FALSE	McTague, A., Nair, U., Malhotra, S., Meyer, E., Trump, N., Gazina, E.V., et al. (2018). Clinical and molecular characterization of KCNT1-related severe early-onset epilepsy. Neurology 90(1), e55-e66. doi: 10.1212/WNL.0000000000004762.	1	Nervous system disease
XB-ART-54305	29162626	DOID:674	cleft palate	FALSE	FALSE	FALSE	FALSE	FALSE	FALSE	FALSE	FALSE	FALSE	TRUE	FALSE	FALSE	FALSE	FALSE	FALSE	FALSE	FALSE	FALSE	Lansdon, L.A., Darbro, B.W., Petrin, A.L., Hulstrand, A.M., Standley, J.M., Brouillette, R.B., et al. (2018). Identification of Isthmin 1 as a Novel Clefting and Craniofacial Patterning Gene in Humans. Genetics 208(1), 283-296. doi: 10.1534/genetics.117.300535.	1	Physical disorder
XB-ART-54305	29162626	DOID:9296	cleft lip	FALSE	FALSE	FALSE	FALSE	FALSE	FALSE	FALSE	FALSE	FALSE	TRUE	FALSE	FALSE	FALSE	FALSE	FALSE	FALSE	FALSE	FALSE	Lansdon, L.A., Darbro, B.W., Petrin, A.L., Hulstrand, A.M., Standley, J.M., Brouillette, R.B., et al. (2018). Identification of Isthmin 1 as a Novel Clefting and Craniofacial Patterning Gene in Humans. Genetics 208(1), 283-296. doi: 10.1534/genetics.117.300535.	1	Physical disorder
XB-ART-54250	29030398	DOID:446	primary hyperaldosteronism	FALSE	FALSE	FALSE	FALSE	FALSE	FALSE	FALSE	FALSE	FALSE	FALSE	FALSE	FALSE	TRUE	FALSE	FALSE	FALSE	FALSE	FALSE	Meyer, D.J., Gatto, C., and Artigas, P. (2017). On the effect of hyperaldosteronism-inducing mutations in Na/K pumps. J Gen Physiol 149(11), 1009-1028. doi: 10.1085/jgp.201711827.	1	Endocrine system disease
XB-ART-5425	12699773	DOID:3328	temporal lobe epilepsy	TRUE	FALSE	FALSE	FALSE	FALSE	FALSE	FALSE	FALSE	FALSE	FALSE	FALSE	FALSE	FALSE	FALSE	FALSE	FALSE	FALSE	FALSE	Fueta, Y., Vasilets, L.A., Takeda, K., Kawamura, M., and Schwarz, W. (2003). Down-regulation of GABA-transporter function by hippocampal translation products: its possible role in epilepsy. Neuroscience 118(2), 371-378.	1	Nervous system disease
XB-ART-54232	29082114	DOID:0050545	visceral heterotaxy	FALSE	FALSE	FALSE	FALSE	FALSE	FALSE	FALSE	FALSE	FALSE	TRUE	FALSE	FALSE	FALSE	FALSE	FALSE	FALSE	FALSE	FALSE	Garfinkel, A.M., and Khokha, M.K. (2017). An interspecies heart-to-heart: Using Xenopus to uncover the genetic basis of congenital heart disease. Curr Pathobiol Rep 5(2), 187-196. doi: 10.1007/s40139-017-0142-x.	1	Physical disorder
XB-ART-54232	29082114	DOID:1682	congenital heart disease	FALSE	FALSE	FALSE	FALSE	FALSE	TRUE	FALSE	FALSE	FALSE	FALSE	FALSE	FALSE	FALSE	FALSE	FALSE	FALSE	FALSE	FALSE	Garfinkel, A.M., and Khokha, M.K. (2017). An interspecies heart-to-heart: Using Xenopus to uncover the genetic basis of congenital heart disease. Curr Pathobiol Rep 5(2), 187-196. doi: 10.1007/s40139-017-0142-x.	1	Cardiovascular system disease
XB-ART-54224	29088427	DOID:83	cataract	TRUE	FALSE	FALSE	FALSE	FALSE	FALSE	FALSE	FALSE	FALSE	FALSE	FALSE	FALSE	FALSE	FALSE	FALSE	FALSE	FALSE	FALSE	Staubli, A., Capatina, N., Fuhrer, Y., Munier, F.L., Labs, S., Schorderet, D.F., et al. (2017). Abnormal creatine transport of mutations in monocarboxylate transporter 12 (MCT12) found in patients with age-related cataract can be partially rescued by exogenous chaperone CD147. Hum Mol Genet 26(21), 4203-4214. doi: 10.1093/hmg/ddx310.	1	Nervous system disease
XB-ART-54224	29088427	DOID:83	cataract	FALSE	FALSE	TRUE	FALSE	FALSE	FALSE	FALSE	FALSE	FALSE	FALSE	FALSE	FALSE	FALSE	FALSE	FALSE	FALSE	FALSE	FALSE	Staubli, A., Capatina, N., Fuhrer, Y., Munier, F.L., Labs, S., Schorderet, D.F., et al. (2017). Abnormal creatine transport of mutations in monocarboxylate transporter 12 (MCT12) found in patients with age-related cataract can be partially rescued by exogenous chaperone CD147. Hum Mol Genet 26(21), 4203-4214. doi: 10.1093/hmg/ddx310.	1	Sensory system disease
XB-ART-54215	28697798	DOID:0060371	autosomal dominant Parkinson's disease 8	TRUE	FALSE	FALSE	FALSE	FALSE	FALSE	FALSE	FALSE	FALSE	FALSE	FALSE	FALSE	FALSE	FALSE	FALSE	FALSE	FALSE	FALSE	Salasova, A., Yokota, C., Potesil, D., Zdrahal, Z., Bryja, V., and Arenas, E. (2017). A proteomic analysis of LRRK2 binding partners reveals interactions with multiple signaling components of the WNT/PCP pathway. Mol Neurodegener 12(1), 54. doi: 10.1186/s13024-017-0193-9.	1	Nervous system disease
XB-ART-54196	29064616	DOID:1826	epilepsy	TRUE	FALSE	FALSE	FALSE	FALSE	FALSE	FALSE	FALSE	FALSE	FALSE	FALSE	FALSE	FALSE	FALSE	FALSE	FALSE	FALSE	FALSE	Li, M., Maljevic, S., Phillips, A.M., Petrovski, S., Hildebrand, M.S., Burgess, R., et al. (2018). Gain-of-function HCN2 variants in genetic epilepsy. Hum Mutat 39(2), 202-209. doi: 10.1002/humu.23357.	1	Nervous system disease
XB-ART-54193	29069600	DOID:1826	epilepsy	TRUE	FALSE	FALSE	FALSE	FALSE	FALSE	FALSE	FALSE	FALSE	FALSE	FALSE	FALSE	FALSE	FALSE	FALSE	FALSE	FALSE	FALSE	Gururaj, S., Palmer, E.E., Sheehan, G.D., Kandula, T., Macintosh, R., Ying, K., et al. (2017). A De Novo Mutation in the Sodium-Activated Potassium Channel KCNT2 Alters Ion Selectivity and Causes Epileptic Encephalopathy. Cell Rep 21(4), 926-933. doi: 10.1016/j.celrep.2017.09.088.	1	Nervous system disease
XB-ART-54175	29050392	DOID:1826	epilepsy	TRUE	FALSE	FALSE	FALSE	FALSE	FALSE	FALSE	FALSE	FALSE	FALSE	FALSE	FALSE	FALSE	FALSE	FALSE	FALSE	FALSE	FALSE	Masnada, S., Hedrich, U.B.S., Gardella, E., Schubert, J., Kaiwar, C., Klee, E.W., et al. (2017). Clinical spectrum and genotype-phenotype associations of KCNA2-related encephalopathies. Brain 140(9), 2337-2354. doi: 10.1093/brain/awx184.	1	Nervous system disease
XB-ART-54172	29053855	DOID:0060309	syndromic X-linked intellectual disability	FALSE	FALSE	FALSE	FALSE	FALSE	FALSE	FALSE	FALSE	TRUE	FALSE	FALSE	FALSE	FALSE	FALSE	FALSE	FALSE	FALSE	FALSE	Niturad, C.E., Lev, D., Kalscheuer, V.M., Charzewska, A., Schubert, J., Lerman-Sagie, T., et al. (2017). Rare GABRA3 variants are associated with epileptic seizures, encephalopathy and dysmorphic features. Brain 140(11), 2879-2894. doi: 10.1093/brain/awx236.	1	Disease of mental health
XB-ART-54172	29053855	DOID:1826	epilepsy	TRUE	FALSE	FALSE	FALSE	FALSE	FALSE	FALSE	FALSE	FALSE	FALSE	FALSE	FALSE	FALSE	FALSE	FALSE	FALSE	FALSE	FALSE	Niturad, C.E., Lev, D., Kalscheuer, V.M., Charzewska, A., Schubert, J., Lerman-Sagie, T., et al. (2017). Rare GABRA3 variants are associated with epileptic seizures, encephalopathy and dysmorphic features. Brain 140(11), 2879-2894. doi: 10.1093/brain/awx236.	1	Nervous system disease
XB-ART-54172	29053855	DOID:936	brain disease	TRUE	FALSE	FALSE	FALSE	FALSE	FALSE	FALSE	FALSE	FALSE	FALSE	FALSE	FALSE	FALSE	FALSE	FALSE	FALSE	FALSE	FALSE	Niturad, C.E., Lev, D., Kalscheuer, V.M., Charzewska, A., Schubert, J., Lerman-Sagie, T., et al. (2017). Rare GABRA3 variants are associated with epileptic seizures, encephalopathy and dysmorphic features. Brain 140(11), 2879-2894. doi: 10.1093/brain/awx236.	1	Nervous system disease
XB-ART-54170	29055942	DOID:9267	urea cycle disorder	FALSE	FALSE	FALSE	FALSE	FALSE	FALSE	FALSE	TRUE	FALSE	FALSE	FALSE	FALSE	FALSE	FALSE	FALSE	FALSE	FALSE	FALSE	Burckhardt, B.C., and Burckhardt, G. (2017). Interaction of Excitatory Amino Acid Transporters 1 - 3 (EAAT1, EAAT2, EAAT3) with N-Carbamoylglutamate and N-Acetylglutamate. Cell Physiol Biochem 43(5), 1907-1916. doi: 10.1159/000484110.	1	Disease of metabolism
XB-ART-54169	27120014	DOID:2841	asthma	FALSE	FALSE	FALSE	FALSE	FALSE	FALSE	FALSE	FALSE	FALSE	FALSE	FALSE	FALSE	FALSE	FALSE	FALSE	FALSE	FALSE	TRUE	Forkuo, G.S., Guthrie, M.L., Yuan, N.Y., Nieman, A.N., Kodali, R., Jahan, R., et al. (2016). Development of GABAA Receptor Subtype-Selective Imidazobenzodiazepines as Novel Asthma Treatments. Mol Pharm 13(6), 2026-2038. doi: 10.1021/acs.molpharmaceut.6b00159.	1	Respiratory system disease
XB-ART-54159	28620080	DOID:898	autosomal dominant polycystic kidney disease	FALSE	TRUE	FALSE	FALSE	FALSE	FALSE	FALSE	FALSE	FALSE	FALSE	FALSE	FALSE	FALSE	FALSE	FALSE	FALSE	FALSE	FALSE	Feng, S., Streets, A.J., Nesin, V., Tran, U., Nie, H., Onopiuk, M., et al. (2017). The Sorting Nexin 3 Retromer Pathway Regulates the Cell Surface Localization and Activity of a Wnt-Activated Polycystin Channel Complex. J Am Soc Nephrol 28(10), 2973-2984. doi: 10.1681/ASN.2016121349.	1	Genetic disease
XB-ART-54159	28620080	DOID:898	autosomal dominant polycystic kidney disease	FALSE	FALSE	FALSE	FALSE	FALSE	FALSE	TRUE	FALSE	FALSE	FALSE	FALSE	FALSE	FALSE	FALSE	FALSE	FALSE	FALSE	FALSE	Feng, S., Streets, A.J., Nesin, V., Tran, U., Nie, H., Onopiuk, M., et al. (2017). The Sorting Nexin 3 Retromer Pathway Regulates the Cell Surface Localization and Activity of a Wnt-Activated Polycystin Channel Complex. J Am Soc Nephrol 28(10), 2973-2984. doi: 10.1681/ASN.2016121349.	1	Urinary system disease
XB-ART-54158	28679688	DOID:11193	syndactyly	FALSE	FALSE	FALSE	TRUE	FALSE	FALSE	FALSE	FALSE	FALSE	FALSE	FALSE	FALSE	FALSE	FALSE	FALSE	FALSE	FALSE	FALSE	Johnston, J.J., Lee, C., Wentzensen, I.M., Parisi, M.A., Crenshaw, M.M., Sapp, J.C., et al. (2017). Compound heterozygous alterations in intraflagellar transport protein CLUAP1 in a child with a novel Joubert and oral-facial-digital overlap syndrome. Cold Spring Harb Mol Case Stud 3(4). doi: 10.1101/mcs.a001321.	1	Musculoskeletal system disease
XB-ART-54158	28679688	DOID:1148	polydactyly	FALSE	FALSE	FALSE	FALSE	FALSE	FALSE	FALSE	FALSE	FALSE	TRUE	FALSE	FALSE	FALSE	FALSE	FALSE	FALSE	FALSE	FALSE	Johnston, J.J., Lee, C., Wentzensen, I.M., Parisi, M.A., Crenshaw, M.M., Sapp, J.C., et al. (2017). Compound heterozygous alterations in intraflagellar transport protein CLUAP1 in a child with a novel Joubert and oral-facial-digital overlap syndrome. Cold Spring Harb Mol Case Stud 3(4). doi: 10.1101/mcs.a001321.	1	Physical disorder
XB-ART-54144	29049289	DOID:1909	melanoma	FALSE	FALSE	FALSE	FALSE	TRUE	FALSE	FALSE	FALSE	FALSE	FALSE	FALSE	FALSE	FALSE	FALSE	FALSE	FALSE	FALSE	FALSE	Plouhinec, J.L., Medina-Ruiz, S., Borday, C., Bernard, E., Vert, J.P., Eisen, M.B., et al. (2017). A molecular atlas of the developing ectoderm defines neural, neural crest, placode, and nonneural progenitor identity in vertebrates. PLoS Biol 15(10), e2004045. doi: 10.1371/journal.pbio.2004045.	1	Cancer
XB-ART-54132	28432198	DOID:0080074	neural tube defect	FALSE	FALSE	FALSE	FALSE	FALSE	FALSE	FALSE	FALSE	FALSE	TRUE	FALSE	FALSE	FALSE	FALSE	FALSE	FALSE	FALSE	FALSE	Toriyama, M., Toriyama, M., Wallingford, J.B., and Finnell, R.H. (2017). Folate-dependent methylation of septins governs ciliogenesis during neural tube closure. Faseb j 31(8), 3622-3635. doi: 10.1096/fj.201700092R.	1	Physical disorder
XB-ART-54128	29017031	DOID:3393	coronary artery disease	FALSE	FALSE	FALSE	FALSE	FALSE	TRUE	FALSE	FALSE	FALSE	FALSE	FALSE	FALSE	FALSE	FALSE	FALSE	FALSE	FALSE	FALSE	Kirsch, N., Chang, L.S., Koch, S., Glinka, A., Dolde, C., Colozza, G., et al. (2017). Angiopoietin-like 4 Is a Wnt Signaling Antagonist that Promotes LRP6 Turnover. Dev Cell 43(1), 71-82.e76. doi: 10.1016/j.devcel.2017.09.011.	1	Cardiovascular system disease
XB-ART-54127	29020621	DOID:0111090	Fanconi anemia complementation group R	FALSE	FALSE	FALSE	FALSE	FALSE	FALSE	FALSE	FALSE	FALSE	FALSE	TRUE	FALSE	FALSE	FALSE	FALSE	FALSE	FALSE	FALSE	Zadorozhny, K., Sannino, V., Belan, O., Mlcouskova, J., Spirek, M., Costanzo, V., et al. (2017). Fanconi-Anemia-Associated Mutations Destabilize RAD51 Filaments and Impair Replication Fork Protection. Cell Rep 21(2), 333-340. doi: 10.1016/j.celrep.2017.09.062.	1	Hematopoietic system disease
XB-ART-54123	28781123	DOID:162	cancer	FALSE	FALSE	FALSE	FALSE	TRUE	FALSE	FALSE	FALSE	FALSE	FALSE	FALSE	FALSE	FALSE	FALSE	FALSE	FALSE	FALSE	FALSE	Gardner, N.J., Gillespie, P.J., Carrington, J.T., Shanks, E.J., McElroy, S.P., Haagensen, E.J., et al. (2017). The High-Affinity Interaction between ORC and DNA that Is Required for Replication Licensing Is Inhibited by 2-Arylquinolin-4-Amines. Cell Chem Biol 24(8), 981-992.e984. doi: 10.1016/j.chembiol.2017.06.019.	1	Cancer
XB-ART-54092	27158779	DOID:0060340	ciliopathy	FALSE	TRUE	FALSE	FALSE	FALSE	FALSE	FALSE	FALSE	FALSE	FALSE	FALSE	FALSE	FALSE	FALSE	FALSE	FALSE	FALSE	FALSE	Toriyama, M., Lee, C., Taylor, S.P., Duran, I., Cohn, D.H., Bruel, A.L., et al. (2016). The ciliopathy-associated CPLANE proteins direct basal body recruitment of intraflagellar transport machinery. Nat Genet 48(6), 648-656. doi: 10.1038/ng.3558.	1	Genetic disease
XB-ART-54092	27158779	DOID:0110986	Joubert syndrome 17	FALSE	TRUE	FALSE	FALSE	FALSE	FALSE	FALSE	FALSE	FALSE	FALSE	FALSE	FALSE	FALSE	FALSE	FALSE	FALSE	FALSE	FALSE	Toriyama, M., Lee, C., Taylor, S.P., Duran, I., Cohn, D.H., Bruel, A.L., et al. (2016). The ciliopathy-associated CPLANE proteins direct basal body recruitment of intraflagellar transport machinery. Nat Genet 48(6), 648-656. doi: 10.1038/ng.3558.	1	Genetic disease
XB-ART-54087	28971850	DOID:0050589	inflammatory bowel disease	FALSE	FALSE	FALSE	FALSE	FALSE	FALSE	FALSE	FALSE	FALSE	FALSE	FALSE	TRUE	FALSE	FALSE	FALSE	FALSE	FALSE	FALSE	Amir Shaghaghi, M., Zhouyao, H., Tu, H., El-Gabalawy, H., Crow, G.H., Levine, M., et al. (2017). The SLC2A14 gene, encoding the novel glucose/dehydroascorbate transporter GLUT14, is associated with inflammatory bowel disease. Am J Clin Nutr 106(6), 1508-1513. doi: 10.3945/ajcn.116.147603.	1	Gastrointestinal system disease
XB-ART-54087	28971850	DOID:8577	ulcerative colitis	FALSE	FALSE	FALSE	FALSE	FALSE	FALSE	FALSE	FALSE	FALSE	FALSE	FALSE	TRUE	FALSE	FALSE	FALSE	FALSE	FALSE	FALSE	Amir Shaghaghi, M., Zhouyao, H., Tu, H., El-Gabalawy, H., Crow, G.H., Levine, M., et al. (2017). The SLC2A14 gene, encoding the novel glucose/dehydroascorbate transporter GLUT14, is associated with inflammatory bowel disease. Am J Clin Nutr 106(6), 1508-1513. doi: 10.3945/ajcn.116.147603.	1	Gastrointestinal system disease
XB-ART-54087	28971850	DOID:8778	Crohn's disease	FALSE	FALSE	FALSE	FALSE	FALSE	FALSE	FALSE	FALSE	FALSE	FALSE	FALSE	TRUE	FALSE	FALSE	FALSE	FALSE	FALSE	FALSE	Amir Shaghaghi, M., Zhouyao, H., Tu, H., El-Gabalawy, H., Crow, G.H., Levine, M., et al. (2017). The SLC2A14 gene, encoding the novel glucose/dehydroascorbate transporter GLUT14, is associated with inflammatory bowel disease. Am J Clin Nutr 106(6), 1508-1513. doi: 10.3945/ajcn.116.147603.	1	Gastrointestinal system disease
XB-ART-54061	28752787	DOID:2377	multiple sclerosis	TRUE	FALSE	FALSE	FALSE	FALSE	FALSE	FALSE	FALSE	FALSE	FALSE	FALSE	FALSE	FALSE	FALSE	FALSE	FALSE	FALSE	FALSE	Mannioui, A., Vauzanges, Q., Fini, J.B., Henriet, E., Sekizar, S., Azoyan, L., et al. (2017). The Xenopus tadpole: An in vivo model to screen drugs favoring remyelination. Mult Scler, 1352458517721355. doi: 10.1177/1352458517721355.	1	Nervous system disease
XB-ART-54058	28943291	DOID:0060164	pain disorder	FALSE	FALSE	FALSE	FALSE	FALSE	FALSE	FALSE	FALSE	TRUE	FALSE	FALSE	FALSE	FALSE	FALSE	FALSE	FALSE	FALSE	FALSE	Karim, N., Khan, I., Ahmad, N., Umar, M.N., and Gavande, N. (2017). Antidepressant, anticonvulsant and antinociceptive effects of 3'-methoxy-6-methylflavone and 3'-hydroxy-6-methylflavone may involve GABAergic mechanisms. Pharmacol Rep 69(5), 1014-1020. doi: 10.1016/j.pharep.2017.03.001.	1	Disease of mental health
XB-ART-54058	28943291	DOID:1596	mental depression	FALSE	FALSE	FALSE	FALSE	FALSE	FALSE	FALSE	FALSE	TRUE	FALSE	FALSE	FALSE	FALSE	FALSE	FALSE	FALSE	FALSE	FALSE	Karim, N., Khan, I., Ahmad, N., Umar, M.N., and Gavande, N. (2017). Antidepressant, anticonvulsant and antinociceptive effects of 3'-methoxy-6-methylflavone and 3'-hydroxy-6-methylflavone may involve GABAergic mechanisms. Pharmacol Rep 69(5), 1014-1020. doi: 10.1016/j.pharep.2017.03.001.	1	Disease of mental health
XB-ART-54058	28943291	DOID:1826	epilepsy	TRUE	FALSE	FALSE	FALSE	FALSE	FALSE	FALSE	FALSE	FALSE	FALSE	FALSE	FALSE	FALSE	FALSE	FALSE	FALSE	FALSE	FALSE	Karim, N., Khan, I., Ahmad, N., Umar, M.N., and Gavande, N. (2017). Antidepressant, anticonvulsant and antinociceptive effects of 3'-methoxy-6-methylflavone and 3'-hydroxy-6-methylflavone may involve GABAergic mechanisms. Pharmacol Rep 69(5), 1014-1020. doi: 10.1016/j.pharep.2017.03.001.	1	Nervous system disease
XB-ART-54055	28944753	DOID:1485	cystic fibrosis	FALSE	TRUE	FALSE	FALSE	FALSE	FALSE	FALSE	FALSE	FALSE	FALSE	FALSE	FALSE	FALSE	FALSE	FALSE	FALSE	FALSE	FALSE	Sorum, B., Torocsik, B., and Csanady, L. (2017). Asymmetry of movements in CFTR's two ATP sites during pore opening serves their distinct functions. Elife 6. doi: 10.7554/eLife.29013.	1	Genetic disease
XB-ART-54054	28945431	DOID:9352	type 2 diabetes mellitus	FALSE	FALSE	FALSE	FALSE	FALSE	FALSE	FALSE	TRUE	FALSE	FALSE	FALSE	FALSE	FALSE	FALSE	FALSE	FALSE	FALSE	FALSE	Han, J., Fei, Y., Zhou, F., Chen, X., Zheng, W., and Fu, J. (2017). Micellar Nanomedicine of Novel Fatty Acid Modified Xenopus Glucagon-like Peptide-1: Improved Physicochemical Characteristics and Therapeutic Utilities for Type 2 Diabetes. Mol Pharm 14(11), 3954-3967. doi: 10.1021/acs.molpharmaceut.7b00632.	1	Disease of metabolism
XB-ART-54043	28927532	DOID:162	cancer	FALSE	FALSE	FALSE	FALSE	TRUE	FALSE	FALSE	FALSE	FALSE	FALSE	FALSE	FALSE	FALSE	FALSE	FALSE	FALSE	FALSE	FALSE	Kucinska, M., Murias, M., and Nowak-Sliwinska, P. (2017). Beyond mouse cancer models: Three-dimensional human-relevant in vitro and non-mammalian in vivo models for photodynamic therapy. Mutat Res 773, 242-262. doi: 10.1016/j.mrrev.2016.09.002.	1	Cancer
XB-ART-53961	28847730	DOID:585	nephrolithiasis	FALSE	FALSE	FALSE	FALSE	FALSE	FALSE	TRUE	FALSE	FALSE	FALSE	FALSE	FALSE	FALSE	FALSE	FALSE	FALSE	FALSE	FALSE	Wang, L., Holmes, R.P., and Peng, J.B. (2017). The L530R variation associated with recurrent kidney stones impairs the structure and function of TRPV5. Biochem Biophys Res Commun 492(3), 362-367. doi: 10.1016/j.bbrc.2017.08.102.	1	Urinary system disease
XB-ART-53879	28761125	DOID:10584	retinitis pigmentosa	TRUE	FALSE	FALSE	FALSE	FALSE	FALSE	FALSE	FALSE	FALSE	FALSE	FALSE	FALSE	FALSE	FALSE	FALSE	FALSE	FALSE	FALSE	Feehan, J.M., Chiu, C.N., Stanar, P., Tam, B.M., Ahmed, S.N., and Moritz, O.L. (2017). Modeling Dominant and Recessive Forms of Retinitis Pigmentosa by Editing Three Rhodopsin-Encoding Genes in Xenopus Laevis Using Crispr/Cas9. Sci Rep 7(1), 6920. doi: 10.1038/s41598-017-07153-4.	1	Nervous system disease
XB-ART-53879	28761125	DOID:10584	retinitis pigmentosa	FALSE	FALSE	TRUE	FALSE	FALSE	FALSE	FALSE	FALSE	FALSE	FALSE	FALSE	FALSE	FALSE	FALSE	FALSE	FALSE	FALSE	FALSE	Feehan, J.M., Chiu, C.N., Stanar, P., Tam, B.M., Ahmed, S.N., and Moritz, O.L. (2017). Modeling Dominant and Recessive Forms of Retinitis Pigmentosa by Editing Three Rhodopsin-Encoding Genes in Xenopus Laevis Using Crispr/Cas9. Sci Rep 7(1), 6920. doi: 10.1038/s41598-017-07153-4.	1	Sensory system disease
XB-ART-53787	28634230	DOID:162	cancer	FALSE	FALSE	FALSE	FALSE	TRUE	FALSE	FALSE	FALSE	FALSE	FALSE	FALSE	FALSE	FALSE	FALSE	FALSE	FALSE	FALSE	FALSE	Zhang, Z., Lei, A., Xu, L., Chen, L., Chen, Y., Zhang, X., et al. (2017). Similarity in gene-regulatory networks suggests that cancer cells share characteristics of embryonic neural cells. J Biol Chem 292(31), 12842-12859. doi: 10.1074/jbc.M117.785865.	1	Cancer
XB-ART-53774	28621423	DOID:0050545	visceral heterotaxy	FALSE	FALSE	FALSE	FALSE	FALSE	FALSE	FALSE	FALSE	FALSE	TRUE	FALSE	FALSE	FALSE	FALSE	FALSE	FALSE	FALSE	FALSE	Gur, M., Cohen, E.B., Genin, O., Fainsod, A., Perles, Z., and Cinnamon, Y. (2017). Roles of the cilium-associated gene CCDC11 in left-right patterning and in laterality disorders in humans. Int J Dev Biol 61(3-4-5), 267-276. doi: 10.1387/ijdb.160442yc.	1	Physical disorder
XB-ART-53774	28621423	DOID:758	situs inversus	FALSE	FALSE	FALSE	FALSE	FALSE	FALSE	FALSE	FALSE	FALSE	TRUE	FALSE	FALSE	FALSE	FALSE	FALSE	FALSE	FALSE	FALSE	Gur, M., Cohen, E.B., Genin, O., Fainsod, A., Perles, Z., and Cinnamon, Y. (2017). Roles of the cilium-associated gene CCDC11 in left-right patterning and in laterality disorders in humans. Int J Dev Biol 61(3-4-5), 267-276. doi: 10.1387/ijdb.160442yc.	1	Physical disorder
XB-ART-53774	28621423	DOID:9562	primary ciliary dyskinesia	FALSE	TRUE	FALSE	FALSE	FALSE	FALSE	FALSE	FALSE	FALSE	FALSE	FALSE	FALSE	FALSE	FALSE	FALSE	FALSE	FALSE	FALSE	Gur, M., Cohen, E.B., Genin, O., Fainsod, A., Perles, Z., and Cinnamon, Y. (2017). Roles of the cilium-associated gene CCDC11 in left-right patterning and in laterality disorders in humans. Int J Dev Biol 61(3-4-5), 267-276. doi: 10.1387/ijdb.160442yc.	1	Genetic disease
XB-ART-53756	28592822	DOID:1485	cystic fibrosis	FALSE	TRUE	FALSE	FALSE	FALSE	FALSE	FALSE	FALSE	FALSE	FALSE	FALSE	FALSE	FALSE	FALSE	FALSE	FALSE	FALSE	FALSE	Stauffer, B.B., Cui, G., Cottrill, K.A., Infield, D.T., and McCarty, N.A. (2017). Bacterial Sphingomyelinase is a State-Dependent Inhibitor of the Cystic Fibrosis Transmembrane conductance Regulator (CFTR). Sci Rep 7(1), 2931. doi: 10.1038/s41598-017-03103-2.	1	Genetic disease
XB-ART-53756	28592822	DOID:3083	chronic obstructive pulmonary disease	FALSE	FALSE	FALSE	FALSE	FALSE	FALSE	FALSE	FALSE	FALSE	FALSE	FALSE	FALSE	FALSE	FALSE	FALSE	FALSE	FALSE	TRUE	Stauffer, B.B., Cui, G., Cottrill, K.A., Infield, D.T., and McCarty, N.A. (2017). Bacterial Sphingomyelinase is a State-Dependent Inhibitor of the Cystic Fibrosis Transmembrane conductance Regulator (CFTR). Sci Rep 7(1), 2931. doi: 10.1038/s41598-017-03103-2.	1	Respiratory system disease
XB-ART-53701	27672271	DOID:684	hepatocellular carcinoma	FALSE	FALSE	FALSE	FALSE	TRUE	FALSE	FALSE	FALSE	FALSE	FALSE	FALSE	FALSE	FALSE	FALSE	FALSE	FALSE	FALSE	FALSE	Liu, L.J., Xie, S.X., Chen, Y.T., Xue, J.L., Zhang, C.J., and Zhu, F. (2016). Aberrant regulation of Wnt signaling in hepatocellular carcinoma. World J Gastroenterol 22(33), 7486-7499. doi: 10.3748/wjg.v22.i33.7486.	1	Cancer
XB-ART-53701	27672271	DOID:684	hepatocellular carcinoma	FALSE	FALSE	FALSE	FALSE	FALSE	FALSE	FALSE	FALSE	FALSE	FALSE	FALSE	FALSE	TRUE	FALSE	FALSE	FALSE	FALSE	FALSE	Liu, L.J., Xie, S.X., Chen, Y.T., Xue, J.L., Zhang, C.J., and Zhu, F. (2016). Aberrant regulation of Wnt signaling in hepatocellular carcinoma. World J Gastroenterol 22(33), 7486-7499. doi: 10.3748/wjg.v22.i33.7486.	1	Endocrine system disease
XB-ART-53701	27672271	DOID:684	hepatocellular carcinoma	FALSE	FALSE	FALSE	FALSE	FALSE	FALSE	FALSE	FALSE	FALSE	FALSE	FALSE	TRUE	FALSE	FALSE	FALSE	FALSE	FALSE	FALSE	Liu, L.J., Xie, S.X., Chen, Y.T., Xue, J.L., Zhang, C.J., and Zhu, F. (2016). Aberrant regulation of Wnt signaling in hepatocellular carcinoma. World J Gastroenterol 22(33), 7486-7499. doi: 10.3748/wjg.v22.i33.7486.	1	Gastrointestinal system disease
XB-ART-53697	28514120	DOID:5768	Nager acrofacial dysostosis	FALSE	FALSE	FALSE	TRUE	FALSE	FALSE	FALSE	FALSE	FALSE	FALSE	FALSE	FALSE	FALSE	FALSE	FALSE	FALSE	FALSE	FALSE	Chen, J., Jacox, L.A., Saldanha, F., and Sive, H. (2017). Mouth development. Wiley Interdiscip Rev Dev Biol 6(5). doi: 10.1002/wdev.275.	1	Musculoskeletal system disease
XB-ART-53664	28490005	DOID:10584	retinitis pigmentosa	FALSE	FALSE	TRUE	FALSE	FALSE	FALSE	FALSE	FALSE	FALSE	FALSE	FALSE	FALSE	FALSE	FALSE	FALSE	FALSE	FALSE	FALSE	Vent-Schmidt, R.Y.J., Wen, R.H., Zong, Z., Chiu, C.N., Tam, B.M., May, C.G., et al. (2017). Opposing Effects of Valproic Acid Treatment Mediated by Histone Deacetylase Inhibitor Activity in Four Transgenic X. laevis Models of Retinitis Pigmentosa. J Neurosci 37(4), 1039-1054. doi: 10.1523/JNEUROSCI.1647-16.2016.	1	Sensory system disease
XB-ART-53664	28490005	DOID:10584	retinitis pigmentosa	TRUE	FALSE	FALSE	FALSE	FALSE	FALSE	FALSE	FALSE	FALSE	FALSE	FALSE	FALSE	FALSE	FALSE	FALSE	FALSE	FALSE	FALSE	Vent-Schmidt, R.Y.J., Wen, R.H., Zong, Z., Chiu, C.N., Tam, B.M., May, C.G., et al. (2017). Opposing Effects of Valproic Acid Treatment Mediated by Histone Deacetylase Inhibitor Activity in Four Transgenic X. laevis Models of Retinitis Pigmentosa. J Neurosci 37(4), 1039-1054. doi: 10.1523/JNEUROSCI.1647-16.2016.	1	Nervous system disease
XB-ART-53653	28462392	DOID:0050954	spinocerebellar ataxia type 1	TRUE	FALSE	FALSE	FALSE	FALSE	FALSE	FALSE	FALSE	FALSE	FALSE	FALSE	FALSE	FALSE	FALSE	FALSE	FALSE	FALSE	FALSE	Li, W.C., Zhu, X.Y., and Ritson, E. (2017). Mechanosensory Stimulation Evokes Acute Concussion-Like Behavior by Activating GIRKs Coupled to Muscarinic Receptors in a Simple Vertebrate. eNeuro 4(2). doi: 10.1523/eneuro.0073-17.2017.	1	Nervous system disease
XB-ART-53605	28381550	DOID:0110144	Bartter disease type 3	FALSE	FALSE	FALSE	FALSE	FALSE	FALSE	TRUE	FALSE	FALSE	FALSE	FALSE	FALSE	FALSE	FALSE	FALSE	FALSE	FALSE	FALSE	Seys, E., Andrini, O., Keck, M., Mansour-Hendili, L., Courand, P.Y., Simian, C., et al. (2017). Clinical and Genetic Spectrum of Bartter Syndrome Type 3. J Am Soc Nephrol 28(8), 2540-2552. doi: 10.1681/asn.2016101057.	1	Urinary system disease
XB-ART-53182	28401306	DOID:0060340	ciliopathy	FALSE	TRUE	FALSE	FALSE	FALSE	FALSE	FALSE	FALSE	FALSE	FALSE	FALSE	FALSE	FALSE	FALSE	FALSE	FALSE	FALSE	FALSE	Getwan, M., and Lienkamp, S.S. (2017). Toolbox in a tadpole: Xenopus for kidney research. Cell Tissue Res 369(1), 143-157. doi: 10.1007/s00441-017-2611-2.	1	Genetic disease
XB-ART-53182	28401306	DOID:557	kidney disease	FALSE	FALSE	FALSE	FALSE	FALSE	FALSE	TRUE	FALSE	FALSE	FALSE	FALSE	FALSE	FALSE	FALSE	FALSE	FALSE	FALSE	FALSE	Getwan, M., and Lienkamp, S.S. (2017). Toolbox in a tadpole: Xenopus for kidney research. Cell Tissue Res 369(1), 143-157. doi: 10.1007/s00441-017-2611-2.	1	Urinary system disease
XB-ART-53117	28195132	DOID:0050545	visceral heterotaxy	FALSE	FALSE	FALSE	FALSE	FALSE	FALSE	FALSE	FALSE	FALSE	TRUE	FALSE	FALSE	FALSE	FALSE	FALSE	FALSE	FALSE	FALSE	Deniz, E., Jonas, S., Hooper, M., J, N.G., Choma, M.A., and Khokha, M.K. (2017). Analysis of Craniocardiac Malformations in Xenopus using Optical Coherence Tomography. Sci Rep 7, 42506. doi: 10.1038/srep42506.	1	Physical disorder
XB-ART-53117	28195132	DOID:0050700	cardiomyopathy	FALSE	FALSE	FALSE	FALSE	FALSE	TRUE	FALSE	FALSE	FALSE	FALSE	FALSE	FALSE	FALSE	FALSE	FALSE	FALSE	FALSE	FALSE	Deniz, E., Jonas, S., Hooper, M., J, N.G., Choma, M.A., and Khokha, M.K. (2017). Analysis of Craniocardiac Malformations in Xenopus using Optical Coherence Tomography. Sci Rep 7, 42506. doi: 10.1038/srep42506.	1	Cardiovascular system disease
XB-ART-53105	28219978	DOID:0050824	sinoatrial node disease	FALSE	FALSE	FALSE	TRUE	FALSE	FALSE	FALSE	FALSE	FALSE	FALSE	FALSE	FALSE	FALSE	FALSE	FALSE	FALSE	FALSE	FALSE	Stallmeyer, B., Kuss, J., Kotthoff, S., Zumhagen, S., Vowinkel, K., Rinne, S., et al. (2017). A Mutation in the G-Protein Gene GNB2 Causes Familial Sinus Node and Atrioventricular Conduction Dysfunction. Circ Res 120(10), e33-e44. doi: 10.1161/CIRCRESAHA.116.310112.	1	Musculoskeletal system disease
XB-ART-53105	28219978	DOID:0050824	sinoatrial node disease	FALSE	FALSE	FALSE	FALSE	FALSE	TRUE	FALSE	FALSE	FALSE	FALSE	FALSE	FALSE	FALSE	FALSE	FALSE	FALSE	FALSE	FALSE	Stallmeyer, B., Kuss, J., Kotthoff, S., Zumhagen, S., Vowinkel, K., Rinne, S., et al. (2017). A Mutation in the G-Protein Gene GNB2 Causes Familial Sinus Node and Atrioventricular Conduction Dysfunction. Circ Res 120(10), e33-e44. doi: 10.1161/CIRCRESAHA.116.310112.	1	Cardiovascular system disease
XB-ART-53080	28255527	DOID:0050434	Andersen-Tawil syndrome	FALSE	FALSE	FALSE	FALSE	FALSE	TRUE	FALSE	FALSE	FALSE	FALSE	FALSE	FALSE	FALSE	FALSE	FALSE	FALSE	FALSE	FALSE	Dubey, A., and Saint-Jeannet, J.P. (2017). Modeling human craniofacial disorders in Xenopus. Curr Pathobiol Rep 5(1), 79-92. doi: 10.1007/s40139-017-0128-8.	1	Cardiovascular system disease
XB-ART-53080	28255527	DOID:0050463	campomelic dysplasia	FALSE	FALSE	FALSE	TRUE	FALSE	FALSE	FALSE	FALSE	FALSE	FALSE	FALSE	FALSE	FALSE	FALSE	FALSE	FALSE	FALSE	FALSE	Dubey, A., and Saint-Jeannet, J.P. (2017). Modeling human craniofacial disorders in Xenopus. Curr Pathobiol Rep 5(1), 79-92. doi: 10.1007/s40139-017-0128-8.	1	Musculoskeletal system disease
XB-ART-53080	28255527	DOID:0050567	orofacial cleft	FALSE	FALSE	FALSE	FALSE	FALSE	FALSE	FALSE	FALSE	FALSE	TRUE	FALSE	FALSE	FALSE	FALSE	FALSE	FALSE	FALSE	FALSE	Dubey, A., and Saint-Jeannet, J.P. (2017). Modeling human craniofacial disorders in Xenopus. Curr Pathobiol Rep 5(1), 79-92. doi: 10.1007/s40139-017-0128-8.	1	Physical disorder
XB-ART-53080	28255527	DOID:0050665	fetal alcohol syndrome	FALSE	FALSE	FALSE	FALSE	FALSE	FALSE	FALSE	FALSE	TRUE	FALSE	FALSE	FALSE	FALSE	FALSE	FALSE	FALSE	FALSE	FALSE	Dubey, A., and Saint-Jeannet, J.P. (2017). Modeling human craniofacial disorders in Xenopus. Curr Pathobiol Rep 5(1), 79-92. doi: 10.1007/s40139-017-0128-8.	1	Disease of mental health
XB-ART-53080	28255527	DOID:0050834	CHARGE syndrome	FALSE	FALSE	FALSE	FALSE	FALSE	FALSE	FALSE	FALSE	FALSE	FALSE	FALSE	FALSE	FALSE	FALSE	FALSE	FALSE	FALSE	FALSE	Dubey, A., and Saint-Jeannet, J.P. (2017). Modeling human craniofacial disorders in Xenopus. Curr Pathobiol Rep 5(1), 79-92. doi: 10.1007/s40139-017-0128-8.	0	Syndrome
XB-ART-53080	28255527	DOID:0060768	Smith-Magenis syndrome	FALSE	TRUE	FALSE	FALSE	FALSE	FALSE	FALSE	FALSE	FALSE	FALSE	FALSE	FALSE	FALSE	FALSE	FALSE	FALSE	FALSE	FALSE	Dubey, A., and Saint-Jeannet, J.P. (2017). Modeling human craniofacial disorders in Xenopus. Curr Pathobiol Rep 5(1), 79-92. doi: 10.1007/s40139-017-0128-8.	1	Genetic disease
XB-ART-53080	28255527	DOID:11198	DiGeorge syndrome	FALSE	TRUE	FALSE	FALSE	FALSE	FALSE	FALSE	FALSE	FALSE	FALSE	FALSE	FALSE	FALSE	FALSE	FALSE	FALSE	FALSE	FALSE	Dubey, A., and Saint-Jeannet, J.P. (2017). Modeling human craniofacial disorders in Xenopus. Curr Pathobiol Rep 5(1), 79-92. doi: 10.1007/s40139-017-0128-8.	1	Genetic disease
XB-ART-53080	28255527	DOID:13359	Ehlers-Danlos syndrome	FALSE	FALSE	FALSE	TRUE	FALSE	FALSE	FALSE	FALSE	FALSE	FALSE	FALSE	FALSE	FALSE	FALSE	FALSE	FALSE	FALSE	FALSE	Dubey, A., and Saint-Jeannet, J.P. (2017). Modeling human craniofacial disorders in Xenopus. Curr Pathobiol Rep 5(1), 79-92. doi: 10.1007/s40139-017-0128-8.	1	Musculoskeletal system disease
XB-ART-53080	28255527	DOID:5768	Nager acrofacial dysostosis	FALSE	FALSE	FALSE	TRUE	FALSE	FALSE	FALSE	FALSE	FALSE	FALSE	FALSE	FALSE	FALSE	FALSE	FALSE	FALSE	FALSE	FALSE	Dubey, A., and Saint-Jeannet, J.P. (2017). Modeling human craniofacial disorders in Xenopus. Curr Pathobiol Rep 5(1), 79-92. doi: 10.1007/s40139-017-0128-8.	1	Musculoskeletal system disease
XB-ART-53052	28190730	DOID:0050545	visceral heterotaxy	FALSE	FALSE	FALSE	FALSE	FALSE	FALSE	FALSE	FALSE	FALSE	TRUE	FALSE	FALSE	FALSE	FALSE	FALSE	FALSE	FALSE	FALSE	Tisler, M., Thumberger, T., Schneider, I., Schweickert, A., and Blum, M. (2017). Leftward Flow Determines Laterality in Conjoined Twins. Curr Biol 27(4), 543-548. doi: 10.1016/j.cub.2016.12.049.	1	Physical disorder
XB-ART-52996	28132423	DOID:0050545	visceral heterotaxy	FALSE	FALSE	FALSE	FALSE	FALSE	FALSE	FALSE	FALSE	FALSE	TRUE	FALSE	FALSE	FALSE	FALSE	FALSE	FALSE	FALSE	FALSE	Tisler, M., Schweickert, A., and Blum, M. (2017). Xenopus, an ideal model organism to study laterality in conjoined twins. Genesis 55(1-2). doi: 10.1002/dvg.22993.	1	Physical disorder
XB-ART-52992	28490005	DOID:10584	retinitis pigmentosa	TRUE	FALSE	FALSE	FALSE	FALSE	FALSE	FALSE	FALSE	FALSE	FALSE	FALSE	FALSE	FALSE	FALSE	FALSE	FALSE	FALSE	FALSE	Vent-Schmidt, R.Y.J., Wen, R.H., Zong, Z., Chiu, C.N., Tam, B.M., May, C.G., et al. (2017). Opposing Effects of Valproic Acid Treatment Mediated by Histone Deacetylase Inhibitor Activity in Four Transgenic X. laevis Models of Retinitis Pigmentosa. J Neurosci 37(4), 1039-1054. doi: 10.1523/JNEUROSCI.1647-16.2016.	1	Nervous system disease
XB-ART-52992	28490005	DOID:10584	retinitis pigmentosa	FALSE	FALSE	TRUE	FALSE	FALSE	FALSE	FALSE	FALSE	FALSE	FALSE	FALSE	FALSE	FALSE	FALSE	FALSE	FALSE	FALSE	FALSE	Vent-Schmidt, R.Y.J., Wen, R.H., Zong, Z., Chiu, C.N., Tam, B.M., May, C.G., et al. (2017). Opposing Effects of Valproic Acid Treatment Mediated by Histone Deacetylase Inhibitor Activity in Four Transgenic X. laevis Models of Retinitis Pigmentosa. J Neurosci 37(4), 1039-1054. doi: 10.1523/JNEUROSCI.1647-16.2016.	1	Sensory system disease
XB-ART-52973	28095622	DOID:0050424	familial adenomatous polyposis	FALSE	TRUE	FALSE	FALSE	FALSE	FALSE	FALSE	FALSE	FALSE	FALSE	FALSE	FALSE	FALSE	FALSE	FALSE	FALSE	FALSE	FALSE	Naert, T., Van Nieuwenhuysen, T., and Vleminckx, K. (2017). TALENs and CRISPR/Cas9 fuel genetically engineered clinically relevant Xenopus tropicalis tumor models. Genesis 55(1-2). doi: 10.1002/dvg.23005.	1	Genetic disease
XB-ART-52973	28095622	DOID:768	retinoblastoma	TRUE	FALSE	FALSE	FALSE	FALSE	FALSE	FALSE	FALSE	FALSE	FALSE	FALSE	FALSE	FALSE	FALSE	FALSE	FALSE	FALSE	FALSE	Naert, T., Van Nieuwenhuysen, T., and Vleminckx, K. (2017). TALENs and CRISPR/Cas9 fuel genetically engineered clinically relevant Xenopus tropicalis tumor models. Genesis 55(1-2). doi: 10.1002/dvg.23005.	1	Nervous system disease
XB-ART-52973	28095622	DOID:768	retinoblastoma	FALSE	FALSE	TRUE	FALSE	FALSE	FALSE	FALSE	FALSE	FALSE	FALSE	FALSE	FALSE	FALSE	FALSE	FALSE	FALSE	FALSE	FALSE	Naert, T., Van Nieuwenhuysen, T., and Vleminckx, K. (2017). TALENs and CRISPR/Cas9 fuel genetically engineered clinically relevant Xenopus tropicalis tumor models. Genesis 55(1-2). doi: 10.1002/dvg.23005.	1	Sensory system disease
XB-ART-52973	28095622	DOID:768	retinoblastoma	FALSE	FALSE	FALSE	FALSE	TRUE	FALSE	FALSE	FALSE	FALSE	FALSE	FALSE	FALSE	FALSE	FALSE	FALSE	FALSE	FALSE	FALSE	Naert, T., Van Nieuwenhuysen, T., and Vleminckx, K. (2017). TALENs and CRISPR/Cas9 fuel genetically engineered clinically relevant Xenopus tropicalis tumor models. Genesis 55(1-2). doi: 10.1002/dvg.23005.	1	Cancer
XB-ART-52914	28054444	DOID:0050887	Townes-Brocks syndrome	FALSE	TRUE	FALSE	FALSE	FALSE	FALSE	FALSE	FALSE	FALSE	FALSE	FALSE	FALSE	FALSE	FALSE	FALSE	FALSE	FALSE	FALSE	Webb, B.D., Metikala, S., Wheeler, P.G., Sherpa, M.D., Houten, S.M., Horb, M.E., et al. (2017). Heterozygous Pathogenic Variant in DACT1 Causes an Autosomal-Dominant Syndrome with Features Overlapping Townes-Brocks Syndrome. Hum Mutat 38(4), 373-377. doi: 10.1002/humu.23171.	1	Genetic disease
XB-ART-52888	27993984	DOID:0110262	cataract 45	TRUE	FALSE	FALSE	FALSE	FALSE	FALSE	FALSE	FALSE	FALSE	FALSE	FALSE	FALSE	FALSE	FALSE	FALSE	FALSE	FALSE	FALSE	Rothe, M., Kanwal, N., Dietmann, P., Seigfried, F.A., Hempel, A., Schutz, D., et al. (2017). An Epha4/Sipa1l3/Wnt pathway regulates eye development and lens maturation. Development 144(2), 321-333. doi: 10.1242/dev.147462.	1	Nervous system disease
XB-ART-52888	27993984	DOID:0110262	cataract 45	FALSE	FALSE	TRUE	FALSE	FALSE	FALSE	FALSE	FALSE	FALSE	FALSE	FALSE	FALSE	FALSE	FALSE	FALSE	FALSE	FALSE	FALSE	Rothe, M., Kanwal, N., Dietmann, P., Seigfried, F.A., Hempel, A., Schutz, D., et al. (2017). An Epha4/Sipa1l3/Wnt pathway regulates eye development and lens maturation. Development 144(2), 321-333. doi: 10.1242/dev.147462.	1	Sensory system disease
XB-ART-52838	27940157	DOID:14702	branchiootorenal syndrome	FALSE	TRUE	FALSE	FALSE	FALSE	FALSE	FALSE	FALSE	FALSE	FALSE	FALSE	FALSE	FALSE	FALSE	FALSE	FALSE	FALSE	FALSE	Neilson, K.M., Abbruzzesse, G., Kenyon, K., Bartolo, V., Krohn, P., Alfandari, D., et al. (2017). Pa2G4 is a novel Six1 co-factor that is required for neural crest and otic development. Dev Biol 421(2), 171-182. doi: 10.1016/j.ydbio.2016.11.021.	1	Genetic disease
XB-ART-52782	12163457	DOID:0050434	Andersen-Tawil syndrome	FALSE	FALSE	FALSE	FALSE	FALSE	TRUE	FALSE	FALSE	FALSE	FALSE	FALSE	FALSE	FALSE	FALSE	FALSE	FALSE	FALSE	FALSE	Tristani-Firouzi, M., Jensen, J.L., Donaldson, M.R., Sansone, V., Meola, G., Hahn, A., et al. (2002). Functional and clinical characterization of KCNJ2 mutations associated with LQT7 (Andersen syndrome). J Clin Invest 110(3), 381-388. doi: 10.1172/jci15183.	1	Cardiovascular system disease
XB-ART-52781	21309066	DOID:0050463	campomelic dysplasia	FALSE	FALSE	FALSE	TRUE	FALSE	FALSE	FALSE	FALSE	FALSE	FALSE	FALSE	FALSE	FALSE	FALSE	FALSE	FALSE	FALSE	FALSE	Lee, Y.H., and Saint-Jeannet, J.P. (2011). Sox9 function in craniofacial development and disease. Genesis 49(4), 200-208. doi: 10.1002/dvg.20717.	1	Musculoskeletal system disease
XB-ART-52719	27558157	DOID:2566	corneal dystrophy	TRUE	FALSE	FALSE	FALSE	FALSE	FALSE	FALSE	FALSE	FALSE	FALSE	FALSE	FALSE	FALSE	FALSE	FALSE	FALSE	FALSE	FALSE	Loganathan, S.K., Schneider, H.P., Morgan, P.E., Deitmer, J.W., and Casey, J.R. (2016). Functional assessment of SLC4A11, an integral membrane protein mutated in corneal dystrophies. Am J Physiol Cell Physiol 311(5), C735-c748. doi: 10.1152/ajpcell.00078.2016.	1	Nervous system disease
XB-ART-52719	27558157	DOID:2566	corneal dystrophy	FALSE	FALSE	TRUE	FALSE	FALSE	FALSE	FALSE	FALSE	FALSE	FALSE	FALSE	FALSE	FALSE	FALSE	FALSE	FALSE	FALSE	FALSE	Loganathan, S.K., Schneider, H.P., Morgan, P.E., Deitmer, J.W., and Casey, J.R. (2016). Functional assessment of SLC4A11, an integral membrane protein mutated in corneal dystrophies. Am J Physiol Cell Physiol 311(5), C735-c748. doi: 10.1152/ajpcell.00078.2016.	1	Sensory system disease
XB-ART-52703	27821521	DOID:0050545	visceral heterotaxy	FALSE	FALSE	FALSE	FALSE	FALSE	FALSE	FALSE	FALSE	FALSE	TRUE	FALSE	FALSE	FALSE	FALSE	FALSE	FALSE	FALSE	FALSE	McDowell, G., Rajadurai, S., and Levin, M. (2016). From cytoskeletal dynamics to organ asymmetry: a nonlinear, regulative pathway underlies left-right patterning. Philos Trans R Soc Lond B Biol Sci 371(1710). doi: 10.1098/rstb.2015.0409.	1	Physical disorder
XB-ART-52702	27821535	DOID:0050545	visceral heterotaxy	FALSE	FALSE	FALSE	FALSE	FALSE	FALSE	FALSE	FALSE	FALSE	TRUE	FALSE	FALSE	FALSE	FALSE	FALSE	FALSE	FALSE	FALSE	Cowan, J.R., Tariq, M., Shaw, C., Rao, M., Belmont, J.W., Lalani, S.R., et al. (2016). Copy number variation as a genetic basis for heterotaxy and heterotaxy-spectrum congenital heart defects. Philos Trans R Soc Lond B Biol Sci 371(1710). doi: 10.1098/rstb.2015.0406.	1	Physical disorder
XB-ART-52702	27821535	DOID:1682	congenital heart disease	FALSE	FALSE	FALSE	FALSE	FALSE	TRUE	FALSE	FALSE	FALSE	FALSE	FALSE	FALSE	FALSE	FALSE	FALSE	FALSE	FALSE	FALSE	Cowan, J.R., Tariq, M., Shaw, C., Rao, M., Belmont, J.W., Lalani, S.R., et al. (2016). Copy number variation as a genetic basis for heterotaxy and heterotaxy-spectrum congenital heart defects. Philos Trans R Soc Lond B Biol Sci 371(1710). doi: 10.1098/rstb.2015.0406.	1	Cardiovascular system disease
XB-ART-52669	27781029	DOID:14777	benign familial neonatal epilepsy	TRUE	FALSE	FALSE	FALSE	FALSE	FALSE	FALSE	FALSE	FALSE	FALSE	FALSE	FALSE	FALSE	FALSE	FALSE	FALSE	FALSE	FALSE	Maljevic, S., Vejzovic, S., Bernhard, M.K., Bertsche, A., Weise, S., Docker, M., et al. (2016). Novel KCNQ3 Mutation in a Large Family with Benign Familial Neonatal Epilepsy: A Rare Cause of Neonatal Seizures. Mol Syndromol 7(4), 189-196. doi: 10.1159/000447461.	1	Nervous system disease
XB-ART-52667	27784267	DOID:0050684	Bowen-Conradi syndrome	FALSE	TRUE	FALSE	FALSE	FALSE	FALSE	FALSE	FALSE	FALSE	FALSE	FALSE	FALSE	FALSE	FALSE	FALSE	FALSE	FALSE	FALSE	Robson, A., Owens, N.D., Baserga, S.J., Khokha, M.K., and Griffin, J.N. (2016). Expression of ribosomopathy genes during Xenopus tropicalis embryogenesis. BMC Dev Biol 16(1), 38. doi: 10.1186/s12861-016-0138-5.	1	Genetic disease
XB-ART-52667	27784267	DOID:0090016	chromosome 5q deletion syndrome	FALSE	FALSE	FALSE	FALSE	FALSE	FALSE	FALSE	FALSE	FALSE	FALSE	TRUE	FALSE	FALSE	FALSE	FALSE	FALSE	FALSE	FALSE	Robson, A., Owens, N.D., Baserga, S.J., Khokha, M.K., and Griffin, J.N. (2016). Expression of ribosomopathy genes during Xenopus tropicalis embryogenesis. BMC Dev Biol 16(1), 38. doi: 10.1186/s12861-016-0138-5.	1	Hematopoietic system disease
XB-ART-52667	27784267	DOID:1339	Diamond-Blackfan anemia	FALSE	FALSE	FALSE	FALSE	FALSE	FALSE	FALSE	FALSE	FALSE	FALSE	TRUE	FALSE	FALSE	FALSE	FALSE	FALSE	FALSE	FALSE	Robson, A., Owens, N.D., Baserga, S.J., Khokha, M.K., and Griffin, J.N. (2016). Expression of ribosomopathy genes during Xenopus tropicalis embryogenesis. BMC Dev Biol 16(1), 38. doi: 10.1186/s12861-016-0138-5.	1	Hematopoietic system disease
XB-ART-52667	27784267	DOID:2529	splenic disease	FALSE	FALSE	FALSE	FALSE	FALSE	FALSE	FALSE	FALSE	FALSE	FALSE	FALSE	FALSE	FALSE	TRUE	FALSE	FALSE	FALSE	FALSE	Robson, A., Owens, N.D., Baserga, S.J., Khokha, M.K., and Griffin, J.N. (2016). Expression of ribosomopathy genes during Xenopus tropicalis embryogenesis. BMC Dev Biol 16(1), 38. doi: 10.1186/s12861-016-0138-5.	1	Immune system disease
XB-ART-52667	27784267	DOID:2729	dyskeratosis congenita	FALSE	FALSE	FALSE	FALSE	FALSE	FALSE	FALSE	FALSE	FALSE	FALSE	FALSE	FALSE	FALSE	FALSE	FALSE	FALSE	TRUE	FALSE	Robson, A., Owens, N.D., Baserga, S.J., Khokha, M.K., and Griffin, J.N. (2016). Expression of ribosomopathy genes during Xenopus tropicalis embryogenesis. BMC Dev Biol 16(1), 38. doi: 10.1186/s12861-016-0138-5.	1	Integumentary system disease
XB-ART-52667	27784267	DOID:2908	Treacher Collins syndrome	FALSE	TRUE	FALSE	FALSE	FALSE	FALSE	FALSE	FALSE	FALSE	FALSE	FALSE	FALSE	FALSE	FALSE	FALSE	FALSE	FALSE	FALSE	Robson, A., Owens, N.D., Baserga, S.J., Khokha, M.K., and Griffin, J.N. (2016). Expression of ribosomopathy genes during Xenopus tropicalis embryogenesis. BMC Dev Biol 16(1), 38. doi: 10.1186/s12861-016-0138-5.	1	Genetic disease
XB-ART-52667	27784267	DOID:5082	liver cirrhosis	FALSE	FALSE	FALSE	FALSE	FALSE	FALSE	FALSE	FALSE	FALSE	FALSE	FALSE	TRUE	FALSE	FALSE	FALSE	FALSE	FALSE	FALSE	Robson, A., Owens, N.D., Baserga, S.J., Khokha, M.K., and Griffin, J.N. (2016). Expression of ribosomopathy genes during Xenopus tropicalis embryogenesis. BMC Dev Biol 16(1), 38. doi: 10.1186/s12861-016-0138-5.	1	Gastrointestinal system disease
XB-ART-52667	27784267	DOID:5082	liver cirrhosis	FALSE	FALSE	FALSE	FALSE	FALSE	FALSE	FALSE	FALSE	FALSE	FALSE	FALSE	FALSE	TRUE	FALSE	FALSE	FALSE	FALSE	FALSE	Robson, A., Owens, N.D., Baserga, S.J., Khokha, M.K., and Griffin, J.N. (2016). Expression of ribosomopathy genes during Xenopus tropicalis embryogenesis. BMC Dev Biol 16(1), 38. doi: 10.1186/s12861-016-0138-5.	1	Endocrine system disease
XB-ART-52598	27739525	DOID:768	retinoblastoma	TRUE	FALSE	FALSE	FALSE	FALSE	FALSE	FALSE	FALSE	FALSE	FALSE	FALSE	FALSE	FALSE	FALSE	FALSE	FALSE	FALSE	FALSE	Naert, T., Colpaert, R., Van Nieuwenhuysen, T., Dimitrakopoulou, D., Leoen, J., Haustraete, J., et al. (2016). CRISPR/Cas9 mediated knockout of rb1 and rbl1 leads to rapid and penetrant retinoblastoma development in Xenopus tropicalis. Sci Rep 6, 35264. doi: 10.1038/srep35264.	1	Nervous system disease
XB-ART-52598	27739525	DOID:768	retinoblastoma	FALSE	FALSE	TRUE	FALSE	FALSE	FALSE	FALSE	FALSE	FALSE	FALSE	FALSE	FALSE	FALSE	FALSE	FALSE	FALSE	FALSE	FALSE	Naert, T., Colpaert, R., Van Nieuwenhuysen, T., Dimitrakopoulou, D., Leoen, J., Haustraete, J., et al. (2016). CRISPR/Cas9 mediated knockout of rb1 and rbl1 leads to rapid and penetrant retinoblastoma development in Xenopus tropicalis. Sci Rep 6, 35264. doi: 10.1038/srep35264.	1	Sensory system disease
XB-ART-52598	27739525	DOID:768	retinoblastoma	FALSE	FALSE	FALSE	FALSE	TRUE	FALSE	FALSE	FALSE	FALSE	FALSE	FALSE	FALSE	FALSE	FALSE	FALSE	FALSE	FALSE	FALSE	Naert, T., Colpaert, R., Van Nieuwenhuysen, T., Dimitrakopoulou, D., Leoen, J., Haustraete, J., et al. (2016). CRISPR/Cas9 mediated knockout of rb1 and rbl1 leads to rapid and penetrant retinoblastoma development in Xenopus tropicalis. Sci Rep 6, 35264. doi: 10.1038/srep35264.	1	Cancer
XB-ART-52543	26867008	DOID:0110127	Bardet-Biedl syndrome 5	FALSE	TRUE	FALSE	FALSE	FALSE	FALSE	FALSE	FALSE	FALSE	FALSE	FALSE	FALSE	FALSE	FALSE	FALSE	FALSE	FALSE	FALSE	Bolch, S.N., Dugger, D.R., Chong, T., McDowell, J.H., and Smith, W.C. (2016). A Splice Variant of Bardet-Biedl Syndrome 5 (BBS5) Protein that Is Selectively Expressed in Retina. PLoS One 11(2), e0148773. doi: 10.1371/journal.pone.0148773.	1	Genetic disease
XB-ART-52513	27336596	DOID:0060681	autosomal dominant nocturnal frontal lobe epilepsy	TRUE	FALSE	FALSE	FALSE	FALSE	FALSE	FALSE	FALSE	FALSE	FALSE	FALSE	FALSE	FALSE	FALSE	FALSE	FALSE	FALSE	FALSE	Nichols, W.A., Henderson, B.J., Marotta, C.B., Yu, C.Y., Richards, C., Dougherty, D.A., et al. (2016). Mutation Linked to Autosomal Dominant Nocturnal Frontal Lobe Epilepsy Reduces Low-Sensitivity alpha4beta2, and Increases alpha5alpha4beta2, Nicotinic Receptor Surface Expression. PLoS One 11(6), e0158032. doi: 10.1371/journal.pone.0158032.	1	Nervous system disease
XB-ART-52511	27375428	DOID:3230	high pressure neurological syndrome	TRUE	FALSE	FALSE	FALSE	FALSE	FALSE	FALSE	FALSE	FALSE	FALSE	FALSE	FALSE	FALSE	FALSE	FALSE	FALSE	FALSE	FALSE	Bliznyuk, A., Gradwohl, G., Hollmann, M., and Grossman, Y. (2016). The Enigma of the Dichotomic Pressure Response of GluN1-4a/b Splice Variants of NMDA Receptor: Experimental and Statistical Analyses. Front Mol Neurosci 9, 40. doi: 10.3389/fnmol.2016.00040.	1	Nervous system disease
XB-ART-52470	27593162	DOID:0050545	visceral heterotaxy	FALSE	FALSE	FALSE	FALSE	FALSE	FALSE	FALSE	FALSE	FALSE	TRUE	FALSE	FALSE	FALSE	FALSE	FALSE	FALSE	FALSE	FALSE	Del Viso, F., Huang, F., Myers, J., Chalfant, M., Zhang, Y., Reza, N., et al. (2016). Congenital Heart Disease Genetics Uncovers Context-Dependent Organization and Function of Nucleoporins at Cilia. Dev Cell 38(5), 478-492. doi: 10.1016/j.devcel.2016.08.002.	1	Physical disorder
XB-ART-52470	27593162	DOID:1682	congenital heart disease	FALSE	FALSE	FALSE	FALSE	FALSE	TRUE	FALSE	FALSE	FALSE	FALSE	FALSE	FALSE	FALSE	FALSE	FALSE	FALSE	FALSE	FALSE	Del Viso, F., Huang, F., Myers, J., Chalfant, M., Zhang, Y., Reza, N., et al. (2016). Congenital Heart Disease Genetics Uncovers Context-Dependent Organization and Function of Nucleoporins at Cilia. Dev Cell 38(5), 478-492. doi: 10.1016/j.devcel.2016.08.002.	1	Cardiovascular system disease
XB-ART-52468	27595926	DOID:0060544	Hermansky-Pudlak syndrome 6	FALSE	TRUE	FALSE	FALSE	FALSE	FALSE	FALSE	FALSE	FALSE	FALSE	FALSE	FALSE	FALSE	FALSE	FALSE	FALSE	FALSE	FALSE	Nakayama, T., Nakajima, K., Cox, A., Fisher, M., Howell, M., Fish, M.B., et al. (2017). no privacy, a Xenopus tropicalis mutant, is a model of human Hermansky-Pudlak Syndrome and allows visualization of internal organogenesis during tadpole development. Dev Biol 426(2), 472-486. doi: 10.1016/j.ydbio.2016.08.020.	1	Genetic disease
XB-ART-52463	27611864	DOID:1923	sex differentiation disease	FALSE	FALSE	FALSE	FALSE	FALSE	FALSE	FALSE	FALSE	FALSE	FALSE	FALSE	FALSE	TRUE	FALSE	FALSE	FALSE	FALSE	FALSE	Li, Y.Y., Chen, J., and Qin, Z.F. (2016). Determining the optimal developmental stages of Xenopus laevis for initiating exposures to chemicals for sensitively detecting their feminizing effects on gonadal differentiation. Aquat Toxicol 179, 134-142. doi: 10.1016/j.aquatox.2016.09.002.	1	Endocrine system disease
XB-ART-52439	27641679	DOID:12387	nephrogenic diabetes insipidus	FALSE	FALSE	FALSE	FALSE	FALSE	FALSE	TRUE	FALSE	FALSE	FALSE	FALSE	FALSE	FALSE	FALSE	FALSE	FALSE	FALSE	FALSE	El Tarazi, A., Lussier, Y., Da Cal, S., Bissonnette, P., and Bichet, D.G. (2016). Functional Recovery of AQP2 Recessive Mutations Through Hetero-Oligomerization with Wild-Type Counterpart. Sci Rep 6, 33298. doi: 10.1038/srep33298.	1	Urinary system disease
XB-ART-52429	27653983	DOID:1485	cystic fibrosis	FALSE	TRUE	FALSE	FALSE	FALSE	FALSE	FALSE	FALSE	FALSE	FALSE	FALSE	FALSE	FALSE	FALSE	FALSE	FALSE	FALSE	FALSE	Telles, C.J., Decker, S.E., Motley, W.W., Peters, A.W., Mehr, A.P., Frizzell, R.A., et al. (2016). Functional and molecular identification of a TASK-1 potassium channel regulating chloride secretion through CFTR channels in the shark rectal gland: implications for cystic fibrosis. Am J Physiol Cell Physiol 311(6), C884-c894. doi: 10.1152/ajpcell.00030.2016.	1	Genetic disease
XB-ART-52421	27677466	DOID:0060041	autism spectrum disorder	FALSE	FALSE	FALSE	FALSE	FALSE	FALSE	FALSE	FALSE	TRUE	FALSE	FALSE	FALSE	FALSE	FALSE	FALSE	FALSE	FALSE	FALSE	Sicca, F., Ambrosini, E., Marchese, M., Sforna, L., Servettini, I., Valvo, G., et al. (2016). Gain-of-function defects of astrocytic Kir4.1 channels in children with autism spectrum disorders and epilepsy. Sci Rep 6, 34325. doi: 10.1038/srep34325.	1	Disease of mental health
XB-ART-52421	27677466	DOID:1826	epilepsy	TRUE	FALSE	FALSE	FALSE	FALSE	FALSE	FALSE	FALSE	FALSE	FALSE	FALSE	FALSE	FALSE	FALSE	FALSE	FALSE	FALSE	FALSE	Sicca, F., Ambrosini, E., Marchese, M., Sforna, L., Servettini, I., Valvo, G., et al. (2016). Gain-of-function defects of astrocytic Kir4.1 channels in children with autism spectrum disorders and epilepsy. Sci Rep 6, 34325. doi: 10.1038/srep34325.	1	Nervous system disease
XB-ART-52368	27550844	DOID:0050888	syndromic intellectual disability	FALSE	FALSE	FALSE	FALSE	FALSE	FALSE	FALSE	FALSE	TRUE	FALSE	FALSE	FALSE	FALSE	FALSE	FALSE	FALSE	FALSE	FALSE	Palmer, E.E., Stuhlmann, T., Weinert, S., Haan, E., Van Esch, H., Holvoet, M., et al. (2018). De novo and inherited mutations in the X-linked gene CLCN4 are associated with syndromic intellectual disability and behavior and seizure disorders in males and females. Mol Psychiatry 23(2), 222-230. doi: 10.1038/mp.2016.135.	1	Disease of mental health
XB-ART-52368	27550844	DOID:0060309	syndromic X-linked intellectual disability	FALSE	FALSE	FALSE	FALSE	FALSE	FALSE	FALSE	FALSE	TRUE	FALSE	FALSE	FALSE	FALSE	FALSE	FALSE	FALSE	FALSE	FALSE	Palmer, E.E., Stuhlmann, T., Weinert, S., Haan, E., Van Esch, H., Holvoet, M., et al. (2018). De novo and inherited mutations in the X-linked gene CLCN4 are associated with syndromic intellectual disability and behavior and seizure disorders in males and females. Mol Psychiatry 23(2), 222-230. doi: 10.1038/mp.2016.135.	1	Disease of mental health
XB-ART-52341	27503008	DOID:0060041	autism spectrum disorder	FALSE	FALSE	FALSE	FALSE	FALSE	FALSE	FALSE	FALSE	TRUE	FALSE	FALSE	FALSE	FALSE	FALSE	FALSE	FALSE	FALSE	FALSE	Truszkowski, T.L., James, E.J., Hasan, M., Wishard, T.J., Liu, Z., Pratt, K.G., et al. (2016). Fragile X mental retardation protein knockdown in the developing Xenopus tadpole optic tectum results in enhanced feedforward inhibition and behavioral deficits. Neural Dev 11(1), 14. doi: 10.1186/s13064-016-0069-7.	1	Disease of mental health
XB-ART-52341	27503008	DOID:14261	fragile X syndrome	FALSE	TRUE	FALSE	FALSE	FALSE	FALSE	FALSE	FALSE	FALSE	FALSE	FALSE	FALSE	FALSE	FALSE	FALSE	FALSE	FALSE	FALSE	Truszkowski, T.L., James, E.J., Hasan, M., Wishard, T.J., Liu, Z., Pratt, K.G., et al. (2016). Fragile X mental retardation protein knockdown in the developing Xenopus tadpole optic tectum results in enhanced feedforward inhibition and behavioral deficits. Neural Dev 11(1), 14. doi: 10.1186/s13064-016-0069-7.	1	Genetic disease
XB-ART-52329	27288484	DOID:1485	cystic fibrosis	FALSE	TRUE	FALSE	FALSE	FALSE	FALSE	FALSE	FALSE	FALSE	FALSE	FALSE	FALSE	FALSE	FALSE	FALSE	FALSE	FALSE	FALSE	Cui, G., Khazanov, N., Stauffer, B.B., Infield, D.T., Imhoff, B.R., Senderowitz, H., et al. (2016). Potentiators exert distinct effects on human, murine, and Xenopus CFTR. Am J Physiol Lung Cell Mol Physiol 311(2), L192-207. doi: 10.1152/ajplung.00056.2016.	1	Genetic disease
XB-ART-52264	27378813	DOID:4479	pseudohypoaldosteronism	FALSE	FALSE	FALSE	FALSE	FALSE	FALSE	TRUE	FALSE	FALSE	FALSE	FALSE	FALSE	FALSE	FALSE	FALSE	FALSE	FALSE	FALSE	Murthy, M., Kurz, T., and O'Shaughnessy, K.M. (2016). ROMK expression remains unaltered in a mouse model of familial hyperkalemic hypertension caused by the CUL3Delta403-459 mutation. Physiol Rep 4(13). doi: 10.14814/phy2.12850.	1	Urinary system disease
XB-ART-52257	27338124	DOID:14219	renal tubular acidosis	FALSE	FALSE	FALSE	FALSE	FALSE	FALSE	TRUE	FALSE	FALSE	FALSE	FALSE	FALSE	FALSE	FALSE	FALSE	FALSE	FALSE	FALSE	Myers, E.J., Yuan, L., Felmlee, M.A., Lin, Y.Y., Jiang, Y., Pei, Y., et al. (2016). A novel mutant Na(+) /HCO3(-) cotransporter NBCe1 in a case of compound-heterozygous inheritance of proximal renal tubular acidosis. J Physiol 594(21), 6267-6286. doi: 10.1113/jp272252.	1	Urinary system disease
XB-ART-5221	12771173	DOID:1289	neurodegenerative disease	TRUE	FALSE	FALSE	FALSE	FALSE	FALSE	FALSE	FALSE	FALSE	FALSE	FALSE	FALSE	FALSE	FALSE	FALSE	FALSE	FALSE	FALSE	Umesh, A., Cohen, B.N., Ross, L.S., and Gill, S.S. (2003). Functional characterization of a glutamate/aspartate transporter from the mosquito Aedes aegypti. J Exp Biol 206(Pt 13), 2241-2255.	1	Nervous system disease
XB-ART-52205	26595158	DOID:417	hypersensitivity reaction type II disease	FALSE	FALSE	FALSE	FALSE	FALSE	FALSE	FALSE	FALSE	FALSE	FALSE	FALSE	FALSE	FALSE	TRUE	FALSE	FALSE	FALSE	FALSE	Pucca, M.B., Bertolini, T.B., Cerni, F.A., Bordon, K.C., Peigneur, S., Tytgat, J., et al. (2016). Immunosuppressive evidence of Tityus serrulatus toxins Ts6 and Ts15: insights of a novel K(+) channel pattern in T cells. Immunology 147(2), 240-250. doi: 10.1111/imm.12559.	1	Immune system disease
XB-ART-52202	26754771	DOID:1612	breast cancer	FALSE	FALSE	FALSE	FALSE	TRUE	FALSE	FALSE	FALSE	FALSE	FALSE	FALSE	FALSE	FALSE	FALSE	FALSE	FALSE	FALSE	FALSE	Puvirajesinghe, T.M., Bertucci, F., Jain, A., Scerbo, P., Belotti, E., Audebert, S., et al. (2016). Identification of p62/SQSTM1 as a component of non-canonical Wnt VANGL2-JNK signalling in breast cancer. Nat Commun 7, 10318. doi: 10.1038/ncomms10318.	1	Cancer
XB-ART-5209	12778053	DOID:5679	retinal disease	TRUE	FALSE	FALSE	FALSE	FALSE	FALSE	FALSE	FALSE	FALSE	FALSE	FALSE	FALSE	FALSE	FALSE	FALSE	FALSE	FALSE	FALSE	Jin, S., Cornwall, M.C., and Oprian, D.D. (2003). Opsin activation as a cause of congenital night blindness. Nat Neurosci 6(7), 731-735. doi: 10.1038/nn1070.	1	Nervous system disease
XB-ART-5209	12778053	DOID:5679	retinal disease	FALSE	FALSE	TRUE	FALSE	FALSE	FALSE	FALSE	FALSE	FALSE	FALSE	FALSE	FALSE	FALSE	FALSE	FALSE	FALSE	FALSE	FALSE	Jin, S., Cornwall, M.C., and Oprian, D.D. (2003). Opsin activation as a cause of congenital night blindness. Nat Neurosci 6(7), 731-735. doi: 10.1038/nn1070.	1	Sensory system disease
XB-ART-5209	12778053	DOID:8499	night blindness	TRUE	FALSE	FALSE	FALSE	FALSE	FALSE	FALSE	FALSE	FALSE	FALSE	FALSE	FALSE	FALSE	FALSE	FALSE	FALSE	FALSE	FALSE	Jin, S., Cornwall, M.C., and Oprian, D.D. (2003). Opsin activation as a cause of congenital night blindness. Nat Neurosci 6(7), 731-735. doi: 10.1038/nn1070.	1	Nervous system disease
XB-ART-5209	12778053	DOID:8499	night blindness	FALSE	FALSE	TRUE	FALSE	FALSE	FALSE	FALSE	FALSE	FALSE	FALSE	FALSE	FALSE	FALSE	FALSE	FALSE	FALSE	FALSE	FALSE	Jin, S., Cornwall, M.C., and Oprian, D.D. (2003). Opsin activation as a cause of congenital night blindness. Nat Neurosci 6(7), 731-735. doi: 10.1038/nn1070.	1	Sensory system disease
XB-ART-52081	27147711	DOID:8398	osteoarthritis	FALSE	FALSE	FALSE	TRUE	FALSE	FALSE	FALSE	FALSE	FALSE	FALSE	FALSE	FALSE	FALSE	FALSE	FALSE	FALSE	FALSE	FALSE	Nalesso, G., Thomas, B.L., Sherwood, J.C., Yu, J., Addimanda, O., Eldridge, S.E., et al. (2017). WNT16 antagonises excessive canonical WNT activation and protects cartilage in osteoarthritis. Ann Rheum Dis 76(1), 218-226. doi: 10.1136/annrheumdis-2015-208577.	1	Musculoskeletal system disease
XB-ART-52073	26449341	DOID:0110253	cataract 14 multiple types	TRUE	FALSE	FALSE	FALSE	FALSE	FALSE	FALSE	FALSE	FALSE	FALSE	FALSE	FALSE	FALSE	FALSE	FALSE	FALSE	FALSE	FALSE	Schadzek, P., Schlingmann, B., Schaarschmidt, F., Lindner, J., Koval, M., Heisterkamp, A., et al. (2016). The cataract related mutation N188T in human connexin46 (hCx46) revealed a critical role for residue N188 in the docking process of gap junction channels. Biochim Biophys Acta 1858(1), 57-66. doi: 10.1016/j.bbamem.2015.10.001.	1	Nervous system disease
XB-ART-52073	26449341	DOID:0110253	cataract 14 multiple types	FALSE	FALSE	TRUE	FALSE	FALSE	FALSE	FALSE	FALSE	FALSE	FALSE	FALSE	FALSE	FALSE	FALSE	FALSE	FALSE	FALSE	FALSE	Schadzek, P., Schlingmann, B., Schaarschmidt, F., Lindner, J., Koval, M., Heisterkamp, A., et al. (2016). The cataract related mutation N188T in human connexin46 (hCx46) revealed a critical role for residue N188 in the docking process of gap junction channels. Biochim Biophys Acta 1858(1), 57-66. doi: 10.1016/j.bbamem.2015.10.001.	1	Sensory system disease
XB-ART-52061	27101845	DOID:13359	Ehlers-Danlos syndrome	FALSE	FALSE	FALSE	TRUE	FALSE	FALSE	FALSE	FALSE	FALSE	FALSE	FALSE	FALSE	FALSE	FALSE	FALSE	FALSE	FALSE	FALSE	Gouignard, N., Maccarana, M., Strate, I., von Stedingk, K., Malmstrom, A., and Pera, E.M. (2016). Musculocontractural Ehlers-Danlos syndrome and neurocristopathies: dermatan sulfate is required for Xenopus neural crest cells to migrate and adhere to fibronectin. Dis Model Mech 9(6), 607-620. doi: 10.1242/dmm.024661.	1	Musculoskeletal system disease
XB-ART-52061	27101845	DOID:1909	melanoma	FALSE	FALSE	FALSE	FALSE	TRUE	FALSE	FALSE	FALSE	FALSE	FALSE	FALSE	FALSE	FALSE	FALSE	FALSE	FALSE	FALSE	FALSE	Gouignard, N., Maccarana, M., Strate, I., von Stedingk, K., Malmstrom, A., and Pera, E.M. (2016). Musculocontractural Ehlers-Danlos syndrome and neurocristopathies: dermatan sulfate is required for Xenopus neural crest cells to migrate and adhere to fibronectin. Dis Model Mech 9(6), 607-620. doi: 10.1242/dmm.024661.	1	Cancer
XB-ART-52012	27033559	DOID:11717	neonatal diabetes mellitus	FALSE	FALSE	FALSE	FALSE	FALSE	FALSE	FALSE	TRUE	FALSE	FALSE	FALSE	FALSE	FALSE	FALSE	FALSE	FALSE	FALSE	FALSE	Babiker, T., Vedovato, N., Patel, K., Thomas, N., Finn, R., Mannikko, R., et al. (2016). Successful transfer to sulfonylureas in KCNJ11 neonatal diabetes is determined by the mutation and duration of diabetes. Diabetologia 59(6), 1162-1166. doi: 10.1007/s00125-016-3921-8.	1	Disease of metabolism
XB-ART-52006	27044412	DOID:0050699	Dent disease	FALSE	FALSE	FALSE	FALSE	FALSE	FALSE	TRUE	FALSE	FALSE	FALSE	FALSE	FALSE	FALSE	FALSE	FALSE	FALSE	FALSE	FALSE	Satoh, N., Yamada, H., Yamazaki, O., Suzuki, M., Nakamura, M., Suzuki, A., et al. (2016). A pure chloride channel mutant of CLC-5 causes Dent's disease via insufficient V-ATPase activation. Pflugers Arch 468(7), 1183-1196. doi: 10.1007/s00424-016-1808-7.	1	Urinary system disease
XB-ART-520	16571646	DOID:0050434	Andersen-Tawil syndrome	FALSE	FALSE	FALSE	FALSE	FALSE	TRUE	FALSE	FALSE	FALSE	FALSE	FALSE	FALSE	FALSE	FALSE	FALSE	FALSE	FALSE	FALSE	Lu, C.W., Lin, J.H., Rajawat, Y.S., Jerng, H., Rami, T.G., Sanchez, X., et al. (2006). Functional and clinical characterization of a mutation in KCNJ2 associated with Andersen-Tawil syndrome. J Med Genet 43(8), 653-659. doi: 10.1136/jmg.2006.040816.	1	Cardiovascular system disease
XB-ART-51977	27019404	DOID:162	cancer	FALSE	FALSE	FALSE	FALSE	TRUE	FALSE	FALSE	FALSE	FALSE	FALSE	FALSE	FALSE	FALSE	FALSE	FALSE	FALSE	FALSE	FALSE	Tanaka, M., Kuriyama, S., Itoh, G., Kohyama, A., Iwabuchi, Y., Shibata, H., et al. (2016). Identification of anti-cancer chemical compounds using Xenopus embryos. Cancer Sci 107(6), 803-811. doi: 10.1111/cas.12940.	1	Cancer
XB-ART-51950	26368820	DOID:0050631	Allan-Herndon-Dudley syndrome	FALSE	TRUE	FALSE	FALSE	FALSE	FALSE	FALSE	FALSE	FALSE	FALSE	FALSE	FALSE	FALSE	FALSE	FALSE	FALSE	FALSE	FALSE	Braun, D., and Schweizer, U. (2015). Efficient Activation of Pathogenic DeltaPhe501 Mutation in Monocarboxylate Transporter 8 by Chemical and Pharmacological Chaperones. Endocrinology 156(12), 4720-4730. doi: 10.1210/en.2015-1393.	1	Genetic disease
XB-ART-51921	26929355	DOID:332	amyotrophic lateral sclerosis	TRUE	FALSE	FALSE	FALSE	FALSE	FALSE	FALSE	FALSE	FALSE	FALSE	FALSE	FALSE	FALSE	FALSE	FALSE	FALSE	FALSE	FALSE	Palma, E., Reyes-Ruiz, J.M., Lopergolo, D., Roseti, C., Bertollini, C., Ruffolo, G., et al. (2016). Acetylcholine receptors from human muscle as pharmacological targets for ALS therapy. Proc Natl Acad Sci U S A 113(11), 3060-3065. doi: 10.1073/pnas.1600251113.	1	Nervous system disease
XB-ART-51896	26910255	DOID:0050545	visceral heterotaxy	FALSE	FALSE	FALSE	FALSE	FALSE	FALSE	FALSE	FALSE	FALSE	TRUE	FALSE	FALSE	FALSE	FALSE	FALSE	FALSE	FALSE	FALSE	Duncan, A.R., and Khokha, M.K. (2016). Xenopus as a model organism for birth defects-Congenital heart disease and heterotaxy. Semin Cell Dev Biol 51, 73-79. doi: 10.1016/j.semcdb.2016.02.022.	1	Physical disorder
XB-ART-51896	26910255	DOID:0050834	CHARGE syndrome	FALSE	FALSE	FALSE	FALSE	FALSE	FALSE	FALSE	FALSE	FALSE	FALSE	FALSE	FALSE	FALSE	FALSE	FALSE	FALSE	FALSE	FALSE	Duncan, A.R., and Khokha, M.K. (2016). Xenopus as a model organism for birth defects-Congenital heart disease and heterotaxy. Semin Cell Dev Biol 51, 73-79. doi: 10.1016/j.semcdb.2016.02.022.	0	Syndrome
XB-ART-51896	26910255	DOID:10629	microphthalmia	TRUE	FALSE	FALSE	FALSE	FALSE	FALSE	FALSE	FALSE	FALSE	FALSE	FALSE	FALSE	FALSE	FALSE	FALSE	FALSE	FALSE	FALSE	Duncan, A.R., and Khokha, M.K. (2016). Xenopus as a model organism for birth defects-Congenital heart disease and heterotaxy. Semin Cell Dev Biol 51, 73-79. doi: 10.1016/j.semcdb.2016.02.022.	1	Nervous system disease
XB-ART-51896	26910255	DOID:10629	microphthalmia	FALSE	FALSE	TRUE	FALSE	FALSE	FALSE	FALSE	FALSE	FALSE	FALSE	FALSE	FALSE	FALSE	FALSE	FALSE	FALSE	FALSE	FALSE	Duncan, A.R., and Khokha, M.K. (2016). Xenopus as a model organism for birth defects-Congenital heart disease and heterotaxy. Semin Cell Dev Biol 51, 73-79. doi: 10.1016/j.semcdb.2016.02.022.	1	Sensory system disease
XB-ART-51893	26914447	DOID:1826	epilepsy	TRUE	FALSE	FALSE	FALSE	FALSE	FALSE	FALSE	FALSE	FALSE	FALSE	FALSE	FALSE	FALSE	FALSE	FALSE	FALSE	FALSE	FALSE	Liin, S.I., Karlsson, U., Bentzen, B.H., Schmitt, N., and Elinder, F. (2016). Polyunsaturated fatty acids are potent openers of human M-channels expressed in Xenopus laevis oocytes. Acta Physiol (Oxf) 218(1), 28-37. doi: 10.1111/apha.12663.	1	Nervous system disease
XB-ART-51890	26920202	DOID:12241	beta thalassemia	FALSE	TRUE	FALSE	FALSE	FALSE	FALSE	FALSE	FALSE	FALSE	FALSE	FALSE	FALSE	FALSE	FALSE	FALSE	FALSE	FALSE	FALSE	Refaat, M.M., El Hage, L., Steffensen, A.B., Hotait, M., Schmitt, N., Scheinman, M., et al. (2016). Iron Overload Leading to Torsades de Pointes in beta-Thalassemia and Long QT Syndrome. Card Electrophysiol Clin 8(1), 247-256. doi: 10.1016/j.ccep.2015.10.037.	1	Genetic disease
XB-ART-51890	26920202	DOID:2843	long QT syndrome	FALSE	FALSE	FALSE	FALSE	FALSE	TRUE	FALSE	FALSE	FALSE	FALSE	FALSE	FALSE	FALSE	FALSE	FALSE	FALSE	FALSE	FALSE	Refaat, M.M., El Hage, L., Steffensen, A.B., Hotait, M., Schmitt, N., Scheinman, M., et al. (2016). Iron Overload Leading to Torsades de Pointes in beta-Thalassemia and Long QT Syndrome. Card Electrophysiol Clin 8(1), 247-256. doi: 10.1016/j.ccep.2015.10.037.	1	Cardiovascular system disease
XB-ART-51882	26874011	DOID:5768	Nager acrofacial dysostosis	FALSE	FALSE	FALSE	TRUE	FALSE	FALSE	FALSE	FALSE	FALSE	FALSE	FALSE	FALSE	FALSE	FALSE	FALSE	FALSE	FALSE	FALSE	Devotta, A., Juraver-Geslin, H., Gonzalez, J.A., Hong, C.S., and Saint-Jeannet, J.P. (2016). Sf3b4-depleted Xenopus embryos: A model to study the pathogenesis of craniofacial defects in Nager syndrome. Dev Biol 415(2), 371-382. doi: 10.1016/j.ydbio.2016.02.010.	1	Musculoskeletal system disease
XB-ART-51813	26851624	DOID:0080205	CAKUT	FALSE	FALSE	FALSE	FALSE	FALSE	FALSE	TRUE	FALSE	FALSE	FALSE	FALSE	FALSE	FALSE	FALSE	FALSE	FALSE	FALSE	FALSE	Lienkamp, S.S. (2016). Using Xenopus to study genetic kidney diseases. Semin Cell Dev Biol 51, 117-124. doi: 10.1016/j.semcdb.2016.02.002.	1	Urinary system disease
XB-ART-51813	26851624	DOID:0111101	maturity-onset diabetes of the young type 5	FALSE	TRUE	FALSE	FALSE	FALSE	FALSE	FALSE	FALSE	FALSE	FALSE	FALSE	FALSE	FALSE	FALSE	FALSE	FALSE	FALSE	FALSE	Lienkamp, S.S. (2016). Using Xenopus to study genetic kidney diseases. Semin Cell Dev Biol 51, 117-124. doi: 10.1016/j.semcdb.2016.02.002.	1	Genetic disease
XB-ART-51813	26851624	DOID:13515	tuberous sclerosis	FALSE	TRUE	FALSE	FALSE	FALSE	FALSE	FALSE	FALSE	FALSE	FALSE	FALSE	FALSE	FALSE	FALSE	FALSE	FALSE	FALSE	FALSE	Lienkamp, S.S. (2016). Using Xenopus to study genetic kidney diseases. Semin Cell Dev Biol 51, 117-124. doi: 10.1016/j.semcdb.2016.02.002.	1	Genetic disease
XB-ART-51813	26851624	DOID:14702	branchiootorenal syndrome	FALSE	TRUE	FALSE	FALSE	FALSE	FALSE	FALSE	FALSE	FALSE	FALSE	FALSE	FALSE	FALSE	FALSE	FALSE	FALSE	FALSE	FALSE	Lienkamp, S.S. (2016). Using Xenopus to study genetic kidney diseases. Semin Cell Dev Biol 51, 117-124. doi: 10.1016/j.semcdb.2016.02.002.	1	Genetic disease
XB-ART-51813	26851624	DOID:1935	Bardet-Biedl syndrome	FALSE	TRUE	FALSE	FALSE	FALSE	FALSE	FALSE	FALSE	FALSE	FALSE	FALSE	FALSE	FALSE	FALSE	FALSE	FALSE	FALSE	FALSE	Lienkamp, S.S. (2016). Using Xenopus to study genetic kidney diseases. Semin Cell Dev Biol 51, 117-124. doi: 10.1016/j.semcdb.2016.02.002.	1	Genetic disease
XB-ART-51813	26851624	DOID:898	autosomal dominant polycystic kidney disease	FALSE	TRUE	FALSE	FALSE	FALSE	FALSE	FALSE	FALSE	FALSE	FALSE	FALSE	FALSE	FALSE	FALSE	FALSE	FALSE	FALSE	FALSE	Lienkamp, S.S. (2016). Using Xenopus to study genetic kidney diseases. Semin Cell Dev Biol 51, 117-124. doi: 10.1016/j.semcdb.2016.02.002.	1	Genetic disease
XB-ART-51813	26851624	DOID:898	autosomal dominant polycystic kidney disease	FALSE	FALSE	FALSE	FALSE	FALSE	FALSE	TRUE	FALSE	FALSE	FALSE	FALSE	FALSE	FALSE	FALSE	FALSE	FALSE	FALSE	FALSE	Lienkamp, S.S. (2016). Using Xenopus to study genetic kidney diseases. Semin Cell Dev Biol 51, 117-124. doi: 10.1016/j.semcdb.2016.02.002.	1	Urinary system disease
XB-ART-5181	12792024	DOID:14067	Plasmodium falciparum malaria	FALSE	FALSE	FALSE	FALSE	FALSE	FALSE	FALSE	FALSE	FALSE	FALSE	FALSE	FALSE	FALSE	FALSE	TRUE	FALSE	FALSE	FALSE	Joet, T., Eckstein-Ludwig, U., Morin, C., and Krishna, S. (2003). Validation of the hexose transporter of Plasmodium falciparum as a novel drug target. Proc Natl Acad Sci U S A 100(13), 7476-7479. doi: 10.1073/pnas.1330865100.	1	Disease by infectious agent
XB-ART-51800	26778163	DOID:0050567	orofacial cleft	FALSE	FALSE	FALSE	FALSE	FALSE	FALSE	FALSE	FALSE	FALSE	TRUE	FALSE	FALSE	FALSE	FALSE	FALSE	FALSE	FALSE	FALSE	Dickinson, A.J. (2016). Using frogs faces to dissect the mechanisms underlying human orofacial defects. Semin Cell Dev Biol 51, 54-63. doi: 10.1016/j.semcdb.2016.01.016.	1	Physical disorder
XB-ART-51783	26806634	DOID:0050524	maturity-onset diabetes of the young	FALSE	TRUE	FALSE	FALSE	FALSE	FALSE	FALSE	FALSE	FALSE	FALSE	FALSE	FALSE	FALSE	FALSE	FALSE	FALSE	FALSE	FALSE	Kofent, J., and Spagnoli, F.M. (2016). Xenopus as a model system for studying pancreatic development and diabetes. Semin Cell Dev Biol 51, 106-116. doi: 10.1016/j.semcdb.2016.01.005.	1	Genetic disease
XB-ART-51783	26806634	DOID:0060334	transient neonatal diabetes mellitus	FALSE	FALSE	FALSE	FALSE	FALSE	FALSE	FALSE	TRUE	FALSE	FALSE	FALSE	FALSE	FALSE	FALSE	FALSE	FALSE	FALSE	FALSE	Kofent, J., and Spagnoli, F.M. (2016). Xenopus as a model system for studying pancreatic development and diabetes. Semin Cell Dev Biol 51, 106-116. doi: 10.1016/j.semcdb.2016.01.005.	1	Disease of metabolism
XB-ART-51783	26806634	DOID:0060639	permanent neonatal diabetes mellitus	FALSE	FALSE	FALSE	FALSE	FALSE	FALSE	FALSE	TRUE	FALSE	FALSE	FALSE	FALSE	FALSE	FALSE	FALSE	FALSE	FALSE	FALSE	Kofent, J., and Spagnoli, F.M. (2016). Xenopus as a model system for studying pancreatic development and diabetes. Semin Cell Dev Biol 51, 106-116. doi: 10.1016/j.semcdb.2016.01.005.	1	Disease of metabolism
XB-ART-51783	26806634	DOID:9351	diabetes mellitus	FALSE	FALSE	FALSE	FALSE	FALSE	FALSE	FALSE	TRUE	FALSE	FALSE	FALSE	FALSE	FALSE	FALSE	FALSE	FALSE	FALSE	FALSE	Kofent, J., and Spagnoli, F.M. (2016). Xenopus as a model system for studying pancreatic development and diabetes. Semin Cell Dev Biol 51, 106-116. doi: 10.1016/j.semcdb.2016.01.005.	1	Disease of metabolism
XB-ART-51764	26749017	DOID:162	cancer	FALSE	FALSE	FALSE	FALSE	TRUE	FALSE	FALSE	FALSE	FALSE	FALSE	FALSE	FALSE	FALSE	FALSE	FALSE	FALSE	FALSE	FALSE	Wei, L., Tominaga, H., Ohgaki, R., Wiriyasermkul, P., Hagiwara, K., Okuda, S., et al. (2016). Specific transport of 3-fluoro-l-alpha-methyl-tyrosine by LAT1 explains its specificity to malignant tumors in imaging. Cancer Sci 107(3), 347-352. doi: 10.1111/cas.12878.	1	Cancer
XB-ART-51592	26582541	DOID:0050563	nonsyndromic deafness	TRUE	FALSE	FALSE	FALSE	FALSE	FALSE	FALSE	FALSE	FALSE	FALSE	FALSE	FALSE	FALSE	FALSE	FALSE	FALSE	FALSE	FALSE	Ramirez-Gordillo, D., Powers, T.R., van Velkinburgh, J.C., Trujillo-Provencio, C., Schilkey, F., and Serrano, E.E. (2015). RNA-Seq and microarray analysis of the Xenopus inner ear transcriptome discloses orthologous OMIM((R)) genes for hereditary disorders of hearing and balance. BMC Res Notes 8, 691. doi: 10.1186/s13104-015-1485-1.	1	Nervous system disease
XB-ART-51592	26582541	DOID:0050563	nonsyndromic deafness	FALSE	FALSE	TRUE	FALSE	FALSE	FALSE	FALSE	FALSE	FALSE	FALSE	FALSE	FALSE	FALSE	FALSE	FALSE	FALSE	FALSE	FALSE	Ramirez-Gordillo, D., Powers, T.R., van Velkinburgh, J.C., Trujillo-Provencio, C., Schilkey, F., and Serrano, E.E. (2015). RNA-Seq and microarray analysis of the Xenopus inner ear transcriptome discloses orthologous OMIM((R)) genes for hereditary disorders of hearing and balance. BMC Res Notes 8, 691. doi: 10.1186/s13104-015-1485-1.	1	Sensory system disease
XB-ART-51592	26582541	DOID:2952	inner ear disease	TRUE	FALSE	FALSE	FALSE	FALSE	FALSE	FALSE	FALSE	FALSE	FALSE	FALSE	FALSE	FALSE	FALSE	FALSE	FALSE	FALSE	FALSE	Ramirez-Gordillo, D., Powers, T.R., van Velkinburgh, J.C., Trujillo-Provencio, C., Schilkey, F., and Serrano, E.E. (2015). RNA-Seq and microarray analysis of the Xenopus inner ear transcriptome discloses orthologous OMIM((R)) genes for hereditary disorders of hearing and balance. BMC Res Notes 8, 691. doi: 10.1186/s13104-015-1485-1.	1	Nervous system disease
XB-ART-51592	26582541	DOID:2952	inner ear disease	FALSE	FALSE	TRUE	FALSE	FALSE	FALSE	FALSE	FALSE	FALSE	FALSE	FALSE	FALSE	FALSE	FALSE	FALSE	FALSE	FALSE	FALSE	Ramirez-Gordillo, D., Powers, T.R., van Velkinburgh, J.C., Trujillo-Provencio, C., Schilkey, F., and Serrano, E.E. (2015). RNA-Seq and microarray analysis of the Xenopus inner ear transcriptome discloses orthologous OMIM((R)) genes for hereditary disorders of hearing and balance. BMC Res Notes 8, 691. doi: 10.1186/s13104-015-1485-1.	1	Sensory system disease
XB-ART-51592	26582541	DOID:3426	vestibular disease	TRUE	FALSE	FALSE	FALSE	FALSE	FALSE	FALSE	FALSE	FALSE	FALSE	FALSE	FALSE	FALSE	FALSE	FALSE	FALSE	FALSE	FALSE	Ramirez-Gordillo, D., Powers, T.R., van Velkinburgh, J.C., Trujillo-Provencio, C., Schilkey, F., and Serrano, E.E. (2015). RNA-Seq and microarray analysis of the Xenopus inner ear transcriptome discloses orthologous OMIM((R)) genes for hereditary disorders of hearing and balance. BMC Res Notes 8, 691. doi: 10.1186/s13104-015-1485-1.	1	Nervous system disease
XB-ART-51592	26582541	DOID:3426	vestibular disease	FALSE	FALSE	TRUE	FALSE	FALSE	FALSE	FALSE	FALSE	FALSE	FALSE	FALSE	FALSE	FALSE	FALSE	FALSE	FALSE	FALSE	FALSE	Ramirez-Gordillo, D., Powers, T.R., van Velkinburgh, J.C., Trujillo-Provencio, C., Schilkey, F., and Serrano, E.E. (2015). RNA-Seq and microarray analysis of the Xenopus inner ear transcriptome discloses orthologous OMIM((R)) genes for hereditary disorders of hearing and balance. BMC Res Notes 8, 691. doi: 10.1186/s13104-015-1485-1.	1	Sensory system disease
XB-ART-51552	26561651	DOID:10763	hypertension	FALSE	FALSE	FALSE	FALSE	FALSE	TRUE	FALSE	FALSE	FALSE	FALSE	FALSE	FALSE	FALSE	FALSE	FALSE	FALSE	FALSE	FALSE	Tutakhel, O.A., Jelen, S., Valdez-Flores, M., Dimke, H., Piersma, S.R., Jimenez, C.R., et al. (2016). Alternative splice variant of the thiazide-sensitive NaCl cotransporter: a novel player in renal salt handling. Am J Physiol Renal Physiol 310(3), F204-216. doi: 10.1152/ajprenal.00429.2015.	1	Cardiovascular system disease
XB-ART-51551	26561946	DOID:0060681	autosomal dominant nocturnal frontal lobe epilepsy	TRUE	FALSE	FALSE	FALSE	FALSE	FALSE	FALSE	FALSE	FALSE	FALSE	FALSE	FALSE	FALSE	FALSE	FALSE	FALSE	FALSE	FALSE	Weltzin, M.M., Lindstrom, J.M., Lukas, R.J., and Whiteaker, P. (2016). Distinctive effects of nicotinic receptor intracellular-loop mutations associated with nocturnal frontal lobe epilepsy. Neuropharmacology 102, 158-173. doi: 10.1016/j.neuropharm.2015.11.004.	1	Nervous system disease
XB-ART-51549	11015449	DOID:14264	benign neonatal seizures	TRUE	FALSE	FALSE	FALSE	FALSE	FALSE	FALSE	FALSE	FALSE	FALSE	FALSE	FALSE	FALSE	FALSE	FALSE	FALSE	FALSE	FALSE	Felix, R. (2000). Channelopathies: ion channel defects linked to heritable clinical disorders. J Med Genet 37(10), 729-740.	1	Nervous system disease
XB-ART-51549	11015449	DOID:14451	hyperkalemic periodic paralysis	FALSE	FALSE	FALSE	FALSE	FALSE	FALSE	FALSE	TRUE	FALSE	FALSE	FALSE	FALSE	FALSE	FALSE	FALSE	FALSE	FALSE	FALSE	Felix, R. (2000). Channelopathies: ion channel defects linked to heritable clinical disorders. J Med Genet 37(10), 729-740.	1	Disease of metabolism
XB-ART-51549	11015449	DOID:963	episodic ataxia	TRUE	FALSE	FALSE	FALSE	FALSE	FALSE	FALSE	FALSE	FALSE	FALSE	FALSE	FALSE	FALSE	FALSE	FALSE	FALSE	FALSE	FALSE	Felix, R. (2000). Channelopathies: ion channel defects linked to heritable clinical disorders. J Med Genet 37(10), 729-740.	1	Nervous system disease
XB-ART-51542	25417160	DOID:162	cancer	FALSE	FALSE	FALSE	FALSE	TRUE	FALSE	FALSE	FALSE	FALSE	FALSE	FALSE	FALSE	FALSE	FALSE	FALSE	FALSE	FALSE	FALSE	Gujral, T.S., Chan, M., Peshkin, L., Sorger, P.K., Kirschner, M.W., and MacBeath, G. (2014). A noncanonical Frizzled2 pathway regulates epithelial-mesenchymal transition and metastasis. Cell 159(4), 844-856. doi: 10.1016/j.cell.2014.10.032.	1	Cancer
XB-ART-51535	25542968	DOID:4479	pseudohypoaldosteronism	FALSE	FALSE	FALSE	FALSE	FALSE	FALSE	TRUE	FALSE	FALSE	FALSE	FALSE	FALSE	FALSE	FALSE	FALSE	FALSE	FALSE	FALSE	Bazua-Valenti, S., Chavez-Canales, M., Rojas-Vega, L., Gonzalez-Rodriguez, X., Vazquez, N., Rodriguez-Gama, A., et al. (2015). The Effect of WNK4 on the Na+-Cl- Cotransporter Is Modulated by Intracellular Chloride. J Am Soc Nephrol 26(8), 1781-1786. doi: 10.1681/ASN.2014050470.	1	Urinary system disease
XB-ART-51522	26538025	DOID:0050545	visceral heterotaxy	FALSE	FALSE	FALSE	FALSE	FALSE	FALSE	FALSE	FALSE	FALSE	TRUE	FALSE	FALSE	FALSE	FALSE	FALSE	FALSE	FALSE	FALSE	Silva, E., Betleja, E., John, E., Spear, P., Moresco, J.J., Zhang, S., et al. (2016). Ccdc11 is a novel centriolar satellite protein essential for ciliogenesis and establishment of left-right asymmetry. Mol Biol Cell 27(1), 48-63. doi: 10.1091/mbc.E15-07-0474.	1	Physical disorder
XB-ART-51522	26538025	DOID:1682	congenital heart disease	FALSE	FALSE	FALSE	FALSE	FALSE	TRUE	FALSE	FALSE	FALSE	FALSE	FALSE	FALSE	FALSE	FALSE	FALSE	FALSE	FALSE	FALSE	Silva, E., Betleja, E., John, E., Spear, P., Moresco, J.J., Zhang, S., et al. (2016). Ccdc11 is a novel centriolar satellite protein essential for ciliogenesis and establishment of left-right asymmetry. Mol Biol Cell 27(1), 48-63. doi: 10.1091/mbc.E15-07-0474.	1	Cardiovascular system disease
XB-ART-51518	26543203	DOID:1925	Coffin-Siris syndrome	FALSE	TRUE	FALSE	FALSE	FALSE	FALSE	FALSE	FALSE	FALSE	FALSE	FALSE	FALSE	FALSE	FALSE	FALSE	FALSE	FALSE	FALSE	Hempel, A., Pagnamenta, A.T., Blyth, M., Mansour, S., McConnell, V., Kou, I., et al. (2016). Deletions and de novo mutations of SOX11 are associated with a neurodevelopmental disorder with features of Coffin-Siris syndrome. J Med Genet 53(3), 152-162. doi: 10.1136/jmedgenet-2015-103393.	1	Genetic disease
XB-ART-51514	26546114	DOID:37	skin disease	FALSE	FALSE	FALSE	FALSE	FALSE	FALSE	FALSE	FALSE	FALSE	FALSE	FALSE	FALSE	FALSE	FALSE	FALSE	FALSE	TRUE	FALSE	Noiret, M., Mottier, S., Angrand, G., Gautier-Courteille, C., Lerivray, H., Viet, J., et al. (2016). Ptbp1 and Exosc9 knockdowns trigger skin stability defects through different pathways. Dev Biol 409(2), 489-501. doi: 10.1016/j.ydbio.2015.11.002.	1	Integumentary system disease
XB-ART-51512	26546975	DOID:0050545	visceral heterotaxy	FALSE	FALSE	FALSE	FALSE	FALSE	FALSE	FALSE	FALSE	FALSE	TRUE	FALSE	FALSE	FALSE	FALSE	FALSE	FALSE	FALSE	FALSE	Bhattacharya, D., Marfo, C.A., Li, D., Lane, M., and Khokha, M.K. (2015). CRISPR/Cas9: An inexpensive, efficient loss of function tool to screen human disease genes in Xenopus. Dev Biol 408(2), 196-204. doi: 10.1016/j.ydbio.2015.11.003.	1	Physical disorder
XB-ART-51512	26546975	DOID:0050632	oculocutaneous albinism	FALSE	TRUE	FALSE	FALSE	FALSE	FALSE	FALSE	FALSE	FALSE	FALSE	FALSE	FALSE	FALSE	FALSE	FALSE	FALSE	FALSE	FALSE	Bhattacharya, D., Marfo, C.A., Li, D., Lane, M., and Khokha, M.K. (2015). CRISPR/Cas9: An inexpensive, efficient loss of function tool to screen human disease genes in Xenopus. Dev Biol 408(2), 196-204. doi: 10.1016/j.ydbio.2015.11.003.	1	Genetic disease
XB-ART-51512	26546975	DOID:0110623	primary ciliary dyskinesia 15	FALSE	TRUE	FALSE	FALSE	FALSE	FALSE	FALSE	FALSE	FALSE	FALSE	FALSE	FALSE	FALSE	FALSE	FALSE	FALSE	FALSE	FALSE	Bhattacharya, D., Marfo, C.A., Li, D., Lane, M., and Khokha, M.K. (2015). CRISPR/Cas9: An inexpensive, efficient loss of function tool to screen human disease genes in Xenopus. Dev Biol 408(2), 196-204. doi: 10.1016/j.ydbio.2015.11.003.	1	Genetic disease
XB-ART-51512	26546975	DOID:1059	intellectual disability	FALSE	FALSE	FALSE	FALSE	FALSE	FALSE	FALSE	FALSE	TRUE	FALSE	FALSE	FALSE	FALSE	FALSE	FALSE	FALSE	FALSE	FALSE	Bhattacharya, D., Marfo, C.A., Li, D., Lane, M., and Khokha, M.K. (2015). CRISPR/Cas9: An inexpensive, efficient loss of function tool to screen human disease genes in Xenopus. Dev Biol 408(2), 196-204. doi: 10.1016/j.ydbio.2015.11.003.	1	Disease of mental health
XB-ART-51512	26546975	DOID:1459	hypothyroidism	FALSE	FALSE	FALSE	FALSE	FALSE	FALSE	FALSE	FALSE	FALSE	FALSE	FALSE	FALSE	TRUE	FALSE	FALSE	FALSE	FALSE	FALSE	Bhattacharya, D., Marfo, C.A., Li, D., Lane, M., and Khokha, M.K. (2015). CRISPR/Cas9: An inexpensive, efficient loss of function tool to screen human disease genes in Xenopus. Dev Biol 408(2), 196-204. doi: 10.1016/j.ydbio.2015.11.003.	1	Endocrine system disease
XB-ART-51512	26546975	DOID:14766	renal agenesis	FALSE	FALSE	FALSE	FALSE	FALSE	FALSE	TRUE	FALSE	FALSE	FALSE	FALSE	FALSE	FALSE	FALSE	FALSE	FALSE	FALSE	FALSE	Bhattacharya, D., Marfo, C.A., Li, D., Lane, M., and Khokha, M.K. (2015). CRISPR/Cas9: An inexpensive, efficient loss of function tool to screen human disease genes in Xenopus. Dev Biol 408(2), 196-204. doi: 10.1016/j.ydbio.2015.11.003.	1	Urinary system disease
XB-ART-51512	26546975	DOID:162	cancer	FALSE	FALSE	FALSE	FALSE	TRUE	FALSE	FALSE	FALSE	FALSE	FALSE	FALSE	FALSE	FALSE	FALSE	FALSE	FALSE	FALSE	FALSE	Bhattacharya, D., Marfo, C.A., Li, D., Lane, M., and Khokha, M.K. (2015). CRISPR/Cas9: An inexpensive, efficient loss of function tool to screen human disease genes in Xenopus. Dev Biol 408(2), 196-204. doi: 10.1016/j.ydbio.2015.11.003.	1	Cancer
XB-ART-51512	26546975	DOID:4481	allergic rhinitis	FALSE	FALSE	FALSE	FALSE	FALSE	FALSE	FALSE	FALSE	FALSE	FALSE	FALSE	FALSE	FALSE	FALSE	FALSE	FALSE	FALSE	TRUE	Bhattacharya, D., Marfo, C.A., Li, D., Lane, M., and Khokha, M.K. (2015). CRISPR/Cas9: An inexpensive, efficient loss of function tool to screen human disease genes in Xenopus. Dev Biol 408(2), 196-204. doi: 10.1016/j.ydbio.2015.11.003.	1	Respiratory system disease
XB-ART-51512	26546975	DOID:9562	primary ciliary dyskinesia	FALSE	TRUE	FALSE	FALSE	FALSE	FALSE	FALSE	FALSE	FALSE	FALSE	FALSE	FALSE	FALSE	FALSE	FALSE	FALSE	FALSE	FALSE	Bhattacharya, D., Marfo, C.A., Li, D., Lane, M., and Khokha, M.K. (2015). CRISPR/Cas9: An inexpensive, efficient loss of function tool to screen human disease genes in Xenopus. Dev Biol 408(2), 196-204. doi: 10.1016/j.ydbio.2015.11.003.	1	Genetic disease
XB-ART-51476	26170305	DOID:0080006	bone development disease	FALSE	FALSE	FALSE	TRUE	FALSE	FALSE	FALSE	FALSE	FALSE	FALSE	FALSE	FALSE	FALSE	FALSE	FALSE	FALSE	FALSE	FALSE	Loukin, S.H., Teng, J., and Kung, C. (2015). A channelopathy mechanism revealed by direct calmodulin activation of TrpV4. Proc Natl Acad Sci U S A 112(30), 9400-9405. doi: 10.1073/pnas.1510602112.	1	Musculoskeletal system disease
XB-ART-51459	26510092	DOID:2106	myotonia congenita	FALSE	FALSE	FALSE	TRUE	FALSE	FALSE	FALSE	FALSE	FALSE	FALSE	FALSE	FALSE	FALSE	FALSE	FALSE	FALSE	FALSE	FALSE	Vindas-Smith, R., Fiore, M., Vasquez, M., Cuenca, P., Del Valle, G., Lagostena, L., et al. (2016). Identification and Functional Characterization of CLCN1 Mutations Found in Nondystrophic Myotonia Patients. Hum Mutat 37(1), 74-83. doi: 10.1002/humu.22916.	1	Musculoskeletal system disease
XB-ART-51433	26493400	DOID:0050545	visceral heterotaxy	FALSE	FALSE	FALSE	FALSE	FALSE	FALSE	FALSE	FALSE	FALSE	TRUE	FALSE	FALSE	FALSE	FALSE	FALSE	FALSE	FALSE	FALSE	Endicott, S.J., Basu, B., Khokha, M., and Brueckner, M. (2015). The NIMA-like kinase Nek2 is a key switch balancing cilia biogenesis and resorption in the development of left-right asymmetry. Development 142(23), 4068-4079. doi: 10.1242/dev.126953.	1	Physical disorder
XB-ART-51433	26493400	DOID:1682	congenital heart disease	FALSE	FALSE	FALSE	FALSE	FALSE	TRUE	FALSE	FALSE	FALSE	FALSE	FALSE	FALSE	FALSE	FALSE	FALSE	FALSE	FALSE	FALSE	Endicott, S.J., Basu, B., Khokha, M., and Brueckner, M. (2015). The NIMA-like kinase Nek2 is a key switch balancing cilia biogenesis and resorption in the development of left-right asymmetry. Development 142(23), 4068-4079. doi: 10.1242/dev.126953.	1	Cardiovascular system disease
XB-ART-51375	25670203	DOID:0050646	distal arthrogryposis	FALSE	FALSE	FALSE	TRUE	FALSE	FALSE	FALSE	FALSE	FALSE	FALSE	FALSE	FALSE	FALSE	FALSE	FALSE	FALSE	FALSE	FALSE	Borbiro, I., Badheka, D., and Rohacs, T. (2015). Activation of TRPV1 channels inhibits mechanosensitive Piezo channel activity by depleting membrane phosphoinositides. Sci Signal 8(363), ra15. doi: 10.1126/scisignal.2005667.	1	Musculoskeletal system disease
XB-ART-51365	26434722	DOID:0080074	neural tube defect	FALSE	FALSE	FALSE	FALSE	FALSE	FALSE	FALSE	FALSE	FALSE	TRUE	FALSE	FALSE	FALSE	FALSE	FALSE	FALSE	FALSE	FALSE	Sullivan-Brown, J.L., Tandon, P., Bird, K.E., Dickinson, D.J., Tintori, S.C., Heppert, J.K., et al. (2016). Identifying Regulators of Morphogenesis Common to Vertebrate Neural Tube Closure and Caenorhabditis elegans Gastrulation. Genetics 202(1), 123-139. doi: 10.1534/genetics.115.183137.	1	Physical disorder
XB-ART-51363	26437037	DOID:1289	neurodegenerative disease	TRUE	FALSE	FALSE	FALSE	FALSE	FALSE	FALSE	FALSE	FALSE	FALSE	FALSE	FALSE	FALSE	FALSE	FALSE	FALSE	FALSE	FALSE	de Broucker, A., Semaille, P., Cailliau, K., Martoriati, A., Comptdaer, T., Bodart, J.F., et al. (2015). Xenopus laevis as a Model to Identify Translation Impairment. J Vis Exp (103). doi: 10.3791/52724.	1	Nervous system disease
XB-ART-51353	26443706	DOID:162	cancer	FALSE	FALSE	FALSE	FALSE	TRUE	FALSE	FALSE	FALSE	FALSE	FALSE	FALSE	FALSE	FALSE	FALSE	FALSE	FALSE	FALSE	FALSE	Lobikin, M., Lobo, D., Blackiston, D.J., Martyniuk, C.J., Tkachenko, E., and Levin, M. (2015). Serotonergic regulation of melanocyte conversion: A bioelectrically regulated network for stochastic all-or-none hyperpigmentation. Sci Signal 8(397), ra99. doi: 10.1126/scisignal.aac6609.	1	Cancer
XB-ART-51334	23933819	DOID:0050704	childhood electroclinical syndrome	TRUE	FALSE	FALSE	FALSE	FALSE	FALSE	FALSE	FALSE	FALSE	FALSE	FALSE	FALSE	FALSE	FALSE	FALSE	FALSE	FALSE	FALSE	Lemke, J.R., Lal, D., Reinthaler, E.M., Steiner, I., Nothnagel, M., Alber, M., et al. (2013). Mutations in GRIN2A cause idiopathic focal epilepsy with rolandic spikes. Nat Genet 45(9), 1067-1072. doi: 10.1038/ng.2728.	1	Nervous system disease
XB-ART-51334	23933819	DOID:2538	Landau-Kleffner syndrome	TRUE	FALSE	FALSE	FALSE	FALSE	FALSE	FALSE	FALSE	FALSE	FALSE	FALSE	FALSE	FALSE	FALSE	FALSE	FALSE	FALSE	FALSE	Lemke, J.R., Lal, D., Reinthaler, E.M., Steiner, I., Nothnagel, M., Alber, M., et al. (2013). Mutations in GRIN2A cause idiopathic focal epilepsy with rolandic spikes. Nat Genet 45(9), 1067-1072. doi: 10.1038/ng.2728.	1	Nervous system disease
XB-ART-51334	23933819	DOID:3329	benign epilepsy with centrotemporal spikes	TRUE	FALSE	FALSE	FALSE	FALSE	FALSE	FALSE	FALSE	FALSE	FALSE	FALSE	FALSE	FALSE	FALSE	FALSE	FALSE	FALSE	FALSE	Lemke, J.R., Lal, D., Reinthaler, E.M., Steiner, I., Nothnagel, M., Alber, M., et al. (2013). Mutations in GRIN2A cause idiopathic focal epilepsy with rolandic spikes. Nat Genet 45(9), 1067-1072. doi: 10.1038/ng.2728.	1	Nervous system disease
XB-ART-51328	25047445	DOID:10652	Alzheimer's disease	TRUE	FALSE	FALSE	FALSE	FALSE	FALSE	FALSE	FALSE	FALSE	FALSE	FALSE	FALSE	FALSE	FALSE	FALSE	FALSE	FALSE	FALSE	Parodi, J., Ormeno, D., and Ochoa-de la Paz, L.D. (2015). Amyloid pore-channel hypothesis: effect of ethanol on aggregation state using frog oocytes for an Alzheimer's disease study. BMB Rep 48(1), 13-18.	1	Nervous system disease
XB-ART-51323	25483587	DOID:0050477	Liddle syndrome	FALSE	FALSE	FALSE	FALSE	FALSE	FALSE	TRUE	FALSE	FALSE	FALSE	FALSE	FALSE	FALSE	FALSE	FALSE	FALSE	FALSE	FALSE	Patel, A.B., Yang, L., Deng, S., and Palmer, L.G. (2014). Feedback inhibition of ENaC: acute and chronic mechanisms. Channels (Austin) 8(5), 444-451. doi: 10.4161/19336950.2014.949190.	1	Urinary system disease
XB-ART-51258	26348728	DOID:10652	Alzheimer's disease	TRUE	FALSE	FALSE	FALSE	FALSE	FALSE	FALSE	FALSE	FALSE	FALSE	FALSE	FALSE	FALSE	FALSE	FALSE	FALSE	FALSE	FALSE	Ullah, G., Demuro, A., Parker, I., and Pearson, J.E. (2015). Analyzing and Modeling the Kinetics of Amyloid Beta Pores Associated with Alzheimer's Disease Pathology. PLoS One 10(9), e0137357. doi: 10.1371/journal.pone.0137357.	1	Nervous system disease
XB-ART-51258	26348728	DOID:1289	neurodegenerative disease	TRUE	FALSE	FALSE	FALSE	FALSE	FALSE	FALSE	FALSE	FALSE	FALSE	FALSE	FALSE	FALSE	FALSE	FALSE	FALSE	FALSE	FALSE	Ullah, G., Demuro, A., Parker, I., and Pearson, J.E. (2015). Analyzing and Modeling the Kinetics of Amyloid Beta Pores Associated with Alzheimer's Disease Pathology. PLoS One 10(9), e0137357. doi: 10.1371/journal.pone.0137357.	1	Nervous system disease
XB-ART-51258	26348728	DOID:680	tauopathy	TRUE	FALSE	FALSE	FALSE	FALSE	FALSE	FALSE	FALSE	FALSE	FALSE	FALSE	FALSE	FALSE	FALSE	FALSE	FALSE	FALSE	FALSE	Ullah, G., Demuro, A., Parker, I., and Pearson, J.E. (2015). Analyzing and Modeling the Kinetics of Amyloid Beta Pores Associated with Alzheimer's Disease Pathology. PLoS One 10(9), e0137357. doi: 10.1371/journal.pone.0137357.	1	Nervous system disease
XB-ART-51222	26338330	DOID:0050989	episodic ataxia type 1	TRUE	FALSE	FALSE	FALSE	FALSE	FALSE	FALSE	FALSE	FALSE	FALSE	FALSE	FALSE	FALSE	FALSE	FALSE	FALSE	FALSE	FALSE	Petitjean, D., Kalstrup, T., Zhao, J., and Blunck, R. (2015). A Disease Mutation Causing Episodic Ataxia Type I in the S1 Links Directly to the Voltage Sensor and the Selectivity Filter in Kv Channels. J Neurosci 35(35), 12198-12206. doi: 10.1523/jneurosci.1419-15.2015.	1	Nervous system disease
XB-ART-51216	26340537	DOID:5419	schizophrenia	FALSE	FALSE	FALSE	FALSE	FALSE	FALSE	FALSE	FALSE	TRUE	FALSE	FALSE	FALSE	FALSE	FALSE	FALSE	FALSE	FALSE	FALSE	Zhang, Q., Du, Y., Zhang, J., Xu, X., Xue, F., Guo, C., et al. (2015). Functional Impact of 14 Single Nucleotide Polymorphisms Causing Missense Mutations of Human alpha7 Nicotinic Receptor. PLoS One 10(9), e0137588. doi: 10.1371/journal.pone.0137588.	1	Disease of mental health
XB-ART-51212	26344136	DOID:8712	neurofibromatosis	FALSE	TRUE	FALSE	FALSE	FALSE	FALSE	FALSE	FALSE	FALSE	FALSE	FALSE	FALSE	FALSE	FALSE	FALSE	FALSE	FALSE	FALSE	Zhu, X., Min, Z., Tan, R., and Tao, Q. (2015). NF2/Merlin is required for the axial pattern formation in the Xenopus laevis embryo. Mech Dev 138 Pt 3, 305-312. doi: 10.1016/j.mod.2015.08.008.	1	Genetic disease
XB-ART-51153	25482562	DOID:0050709	Ohtahara syndrome	TRUE	FALSE	FALSE	FALSE	FALSE	FALSE	FALSE	FALSE	FALSE	FALSE	FALSE	FALSE	FALSE	FALSE	FALSE	FALSE	FALSE	FALSE	Kim, G.E., Kronengold, J., Barcia, G., Quraishi, I.H., Martin, H.C., Blair, E., et al. (2014). Human slack potassium channel mutations increase positive cooperativity between individual channels. Cell Rep 9(5), 1661-1672. doi: 10.1016/j.celrep.2014.11.015.	1	Nervous system disease
XB-ART-51129	26253075	DOID:1596	mental depression	FALSE	FALSE	FALSE	FALSE	FALSE	FALSE	FALSE	FALSE	TRUE	FALSE	FALSE	FALSE	FALSE	FALSE	FALSE	FALSE	FALSE	FALSE	Park, H.J., Baik, H.J., Kim, D.Y., Lee, G.Y., Woo, J.H., Zuo, Z., et al. (2015). Doxepin and imipramine but not fluoxetine reduce the activity of the rat glutamate transporter EAAT3 expressed in Xenopus oocytes. BMC Anesthesiol 15, 116. doi: 10.1186/s12871-015-0098-5.	1	Disease of mental health
XB-ART-51084	26236566	DOID:9351	diabetes mellitus	FALSE	FALSE	FALSE	FALSE	FALSE	FALSE	FALSE	TRUE	FALSE	FALSE	FALSE	FALSE	FALSE	FALSE	FALSE	FALSE	FALSE	FALSE	Salanga, M.C., and Horb, M.E. (2015). Xenopus as a Model for GI/Pancreas Disease. Curr Pathobiol Rep 3(2), 137-145. doi: 10.1007/s40139-015-0076-0.	1	Disease of metabolism
XB-ART-51029	26192473	DOID:12858	Huntington's disease	TRUE	FALSE	FALSE	FALSE	FALSE	FALSE	FALSE	FALSE	FALSE	FALSE	FALSE	FALSE	FALSE	FALSE	FALSE	FALSE	FALSE	FALSE	Haremaki, T., Deglincerti, A., and Brivanlou, A.H. (2015). Huntingtin is required for ciliogenesis and neurogenesis during early Xenopus development. Dev Biol 408(2), 305-315. doi: 10.1016/j.ydbio.2015.07.013.	1	Nervous system disease
XB-ART-51028	26196063	DOID:10629	microphthalmia	TRUE	FALSE	FALSE	FALSE	FALSE	FALSE	FALSE	FALSE	FALSE	FALSE	FALSE	FALSE	FALSE	FALSE	FALSE	FALSE	FALSE	FALSE	Zhu, X., Dai, F.R., Wang, J., Zhang, Y., Tan, Z.P., and Zhang, Y. (2015). Novel BCOR mutation in a boy with Lenz microphthalmia/oculo-facio-cardio-dental (OFCD) syndrome. Gene 571(1), 142-144. doi: 10.1016/j.gene.2015.07.061.	1	Nervous system disease
XB-ART-51028	26196063	DOID:10629	microphthalmia	FALSE	FALSE	TRUE	FALSE	FALSE	FALSE	FALSE	FALSE	FALSE	FALSE	FALSE	FALSE	FALSE	FALSE	FALSE	FALSE	FALSE	FALSE	Zhu, X., Dai, F.R., Wang, J., Zhang, Y., Tan, Z.P., and Zhang, Y. (2015). Novel BCOR mutation in a boy with Lenz microphthalmia/oculo-facio-cardio-dental (OFCD) syndrome. Gene 571(1), 142-144. doi: 10.1016/j.gene.2015.07.061.	1	Sensory system disease
XB-ART-51019	26202884	DOID:3230	high pressure neurological syndrome	TRUE	FALSE	FALSE	FALSE	FALSE	FALSE	FALSE	FALSE	FALSE	FALSE	FALSE	FALSE	FALSE	FALSE	FALSE	FALSE	FALSE	FALSE	Bliznyuk, A., Aviner, B., Golan, H., Hollmann, M., and Grossman, Y. (2015). The N-methyl-D-aspartate receptor's neglected subunit - GluN1 matters under normal and hyperbaric conditions. Eur J Neurosci 42(8), 2577-2584. doi: 10.1111/ejn.13022.	1	Nervous system disease
XB-ART-50976	26168875	DOID:3328	temporal lobe epilepsy	TRUE	FALSE	FALSE	FALSE	FALSE	FALSE	FALSE	FALSE	FALSE	FALSE	FALSE	FALSE	FALSE	FALSE	FALSE	FALSE	FALSE	FALSE	Roseti, C., van Vliet, E.A., Cifelli, P., Ruffolo, G., Baayen, J.C., Di Castro, M.A., et al. (2015). GABAA currents are decreased by IL-1beta in epileptogenic tissue of patients with temporal lobe epilepsy: implications for ictogenesis. Neurobiol Dis 82, 311-320. doi: 10.1016/j.nbd.2015.07.003.	1	Nervous system disease
XB-ART-50951	25376491	DOID:0110259	cataract 43	TRUE	FALSE	FALSE	FALSE	FALSE	FALSE	FALSE	FALSE	FALSE	FALSE	FALSE	FALSE	FALSE	FALSE	FALSE	FALSE	FALSE	FALSE	Lee, C.F., Melkani, G.C., and Bernstein, S.I. (2014). The UNC-45 myosin chaperone: from worms to flies to vertebrates. Int Rev Cell Mol Biol 313, 103-144. doi: 10.1016/b978-0-12-800177-6.00004-9.	1	Nervous system disease
XB-ART-50951	25376491	DOID:0110259	cataract 43	FALSE	FALSE	TRUE	FALSE	FALSE	FALSE	FALSE	FALSE	FALSE	FALSE	FALSE	FALSE	FALSE	FALSE	FALSE	FALSE	FALSE	FALSE	Lee, C.F., Melkani, G.C., and Bernstein, S.I. (2014). The UNC-45 myosin chaperone: from worms to flies to vertebrates. Int Rev Cell Mol Biol 313, 103-144. doi: 10.1016/b978-0-12-800177-6.00004-9.	1	Sensory system disease
XB-ART-50938	26144049	DOID:0050567	orofacial cleft	FALSE	FALSE	FALSE	FALSE	FALSE	FALSE	FALSE	FALSE	FALSE	TRUE	FALSE	FALSE	FALSE	FALSE	FALSE	FALSE	FALSE	FALSE	Wahl, S.E., Kennedy, A.E., Wyatt, B.H., Moore, A.D., Pridgen, D.E., Cherry, A.M., et al. (2015). The role of folate metabolism in orofacial development and clefting. Dev Biol 405(1), 108-122. doi: 10.1016/j.ydbio.2015.07.001.	1	Physical disorder
XB-ART-50935	26150138	DOID:0050569	Seckel syndrome	FALSE	TRUE	FALSE	FALSE	FALSE	FALSE	FALSE	FALSE	FALSE	FALSE	FALSE	FALSE	FALSE	FALSE	FALSE	FALSE	FALSE	FALSE	Rapchak, C.E., Patel, N., Hudson, J., and Crawford, M. (2015). Developmental role of plk4 in Xenopus laevis and Danio rerio: implications for Seckel Syndrome. Biochem Cell Biol 93(4), 396-404. doi: 10.1139/bcb-2015-0003.	1	Genetic disease
XB-ART-50883	26100918	DOID:0050775	schneckenbecken dysplasia	FALSE	FALSE	FALSE	TRUE	FALSE	FALSE	FALSE	FALSE	FALSE	FALSE	FALSE	FALSE	FALSE	FALSE	FALSE	FALSE	FALSE	FALSE	De Domenico, E., Owens, N.D., Grant, I.M., Gomes-Faria, R., and Gilchrist, M.J. (2015). Molecular asymmetry in the 8-cell stage Xenopus tropicalis embryo described by single blastomere transcript sequencing. Dev Biol 408(2), 252-268. doi: 10.1016/j.ydbio.2015.06.010.	1	Musculoskeletal system disease
XB-ART-50867	26119670	DOID:1875	impotence	FALSE	FALSE	FALSE	FALSE	FALSE	FALSE	FALSE	FALSE	TRUE	FALSE	FALSE	FALSE	FALSE	FALSE	FALSE	FALSE	FALSE	FALSE	Silva, C.N., Nunes, K.P., Torres, F.S., Cassoli, J.S., Santos, D.M., Almeida Fde, M., et al. (2015). PnPP-19, a Synthetic and Nontoxic Peptide Designed from a Phoneutria nigriventer Toxin, Potentiates Erectile Function via NO/cGMP. J Urol 194(5), 1481-1490. doi: 10.1016/j.juro.2015.06.081.	1	Disease of mental health
XB-ART-50865	26102711	DOID:3948	adrenocortical carcinoma	FALSE	FALSE	FALSE	FALSE	TRUE	FALSE	FALSE	FALSE	FALSE	FALSE	FALSE	FALSE	FALSE	FALSE	FALSE	FALSE	FALSE	FALSE	Xu, S., Hardege, I., Murthy, M., Gordon, R., Stowasser, M., and O'Shaughnessy, K. (2015). 9B.03: A NOVEL INSERTIONAL SOMATIC KCNJ5 MUTATION IN AN AUSTRALIAN PATIENT WITH AN ALDOSTERONE PRODUCING ADENOMA. J Hypertens 33 Suppl 1, e120. doi: 10.1097/01.hjh.0000467675.16684.bb.	1	Cancer
XB-ART-50865	26102711	DOID:3948	adrenocortical carcinoma	FALSE	FALSE	FALSE	FALSE	FALSE	FALSE	FALSE	FALSE	FALSE	FALSE	FALSE	FALSE	TRUE	FALSE	FALSE	FALSE	FALSE	FALSE	Xu, S., Hardege, I., Murthy, M., Gordon, R., Stowasser, M., and O'Shaughnessy, K. (2015). 9B.03: A NOVEL INSERTIONAL SOMATIC KCNJ5 MUTATION IN AN AUSTRALIAN PATIENT WITH AN ALDOSTERONE PRODUCING ADENOMA. J Hypertens 33 Suppl 1, e120. doi: 10.1097/01.hjh.0000467675.16684.bb.	1	Endocrine system disease
XB-ART-50857	26097888	DOID:9256	colorectal cancer	FALSE	FALSE	FALSE	FALSE	TRUE	FALSE	FALSE	FALSE	FALSE	FALSE	FALSE	FALSE	FALSE	FALSE	FALSE	FALSE	FALSE	FALSE	Van Nieuwenhuysen, T., Naert, T., Tran, H.T., Van Imschoot, G., Geurs, S., Sanders, E., et al. (2015). TALEN-mediated apc mutation in Xenopus tropicalis phenocopies familial adenomatous polyposis. Oncoscience 2(5), 555-566. doi: 10.18632/oncoscience.166.	1	Cancer
XB-ART-50857	26097888	DOID:9256	colorectal cancer	FALSE	FALSE	FALSE	FALSE	FALSE	FALSE	FALSE	FALSE	FALSE	FALSE	FALSE	TRUE	FALSE	FALSE	FALSE	FALSE	FALSE	FALSE	Van Nieuwenhuysen, T., Naert, T., Tran, H.T., Van Imschoot, G., Geurs, S., Sanders, E., et al. (2015). TALEN-mediated apc mutation in Xenopus tropicalis phenocopies familial adenomatous polyposis. Oncoscience 2(5), 555-566. doi: 10.18632/oncoscience.166.	1	Gastrointestinal system disease
XB-ART-50852	26092849	DOID:1485	cystic fibrosis	FALSE	TRUE	FALSE	FALSE	FALSE	FALSE	FALSE	FALSE	FALSE	FALSE	FALSE	FALSE	FALSE	FALSE	FALSE	FALSE	FALSE	FALSE	Cibois, M., Luxardi, G., Chevalier, B., Thome, V., Mercey, O., Zaragosi, L.E., et al. (2015). BMP signalling controls the construction of vertebrate mucociliary epithelia. Development 142(13), 2352-2363. doi: 10.1242/dev.118679.	1	Genetic disease
XB-ART-50846	26079437	DOID:0060340	ciliopathy	FALSE	TRUE	FALSE	FALSE	FALSE	FALSE	FALSE	FALSE	FALSE	FALSE	FALSE	FALSE	FALSE	FALSE	FALSE	FALSE	FALSE	FALSE	Ossipova, O., Chu, C.W., Fillatre, J., Brott, B.K., Itoh, K., and Sokol, S.Y. (2015). The involvement of PCP proteins in radial cell intercalations during Xenopus embryonic development. Dev Biol 408(2), 316-327. doi: 10.1016/j.ydbio.2015.06.013.	1	Genetic disease
XB-ART-50841	25024265	DOID:14452	hypokalemic periodic paralysis	FALSE	FALSE	FALSE	FALSE	FALSE	FALSE	FALSE	TRUE	FALSE	FALSE	FALSE	FALSE	FALSE	FALSE	FALSE	FALSE	FALSE	FALSE	Mi, W., Rybalchenko, V., and Cannon, S.C. (2014). Disrupted coupling of gating charge displacement to Na+ current activation for DIIS4 mutations in hypokalemic periodic paralysis. J Gen Physiol 144(2), 137-145. doi: 10.1085/jgp.201411199.	1	Disease of metabolism
XB-ART-50840	25024266	DOID:1485	cystic fibrosis	FALSE	TRUE	FALSE	FALSE	FALSE	FALSE	FALSE	FALSE	FALSE	FALSE	FALSE	FALSE	FALSE	FALSE	FALSE	FALSE	FALSE	FALSE	Cui, G., Rahman, K.S., Infield, D.T., Kuang, C., Prince, C.Z., and McCarty, N.A. (2014). Three charged amino acids in extracellular loop 1 are involved in maintaining the outer pore architecture of CFTR. J Gen Physiol 144(2), 159-179. doi: 10.1085/jgp.201311122.	1	Genetic disease
XB-ART-50835	26066609	DOID:2843	long QT syndrome	FALSE	FALSE	FALSE	FALSE	FALSE	TRUE	FALSE	FALSE	FALSE	FALSE	FALSE	FALSE	FALSE	FALSE	FALSE	FALSE	FALSE	FALSE	Steffensen, A.B., Refaat, M.M., David, J.P., Mujezinovic, A., Calloe, K., Wojciak, J., et al. (2015). High incidence of functional ion-channel abnormalities in a consecutive Long QT cohort with novel missense genetic variants of unknown significance. Sci Rep 5, 10009. doi: 10.1038/srep10009.	1	Cardiovascular system disease
XB-ART-50832	26071591	DOID:0111095	Fanconi anemia complementation group A	FALSE	FALSE	FALSE	FALSE	FALSE	FALSE	FALSE	FALSE	FALSE	FALSE	TRUE	FALSE	FALSE	FALSE	FALSE	FALSE	FALSE	FALSE	Budzowska, M., Graham, T.G., Sobeck, A., Waga, S., and Walter, J.C. (2015). Regulation of the Rev1-pol zeta complex during bypass of a DNA interstrand cross-link. Embo j 34(14), 1971-1985. doi: 10.15252/embj.201490878.	1	Hematopoietic system disease
XB-ART-50812	25267914	DOID:1485	cystic fibrosis	FALSE	TRUE	FALSE	FALSE	FALSE	FALSE	FALSE	FALSE	FALSE	FALSE	FALSE	FALSE	FALSE	FALSE	FALSE	FALSE	FALSE	FALSE	Csanady, L., and Torocsik, B. (2014). Structure-activity analysis of a CFTR channel potentiator: Distinct molecular parts underlie dual gating effects. J Gen Physiol 144(4), 321-336. doi: 10.1085/jgp.201411246.	1	Genetic disease
XB-ART-50793	26047794	DOID:12678	hypercalcemia	FALSE	FALSE	FALSE	FALSE	FALSE	FALSE	FALSE	TRUE	FALSE	FALSE	FALSE	FALSE	FALSE	FALSE	FALSE	FALSE	FALSE	FALSE	Schlingmann, K.P., Ruminska, J., Kaufmann, M., Dursun, I., Patti, M., Kranz, B., et al. (2016). Autosomal-Recessive Mutations in SLC34A1 Encoding Sodium-Phosphate Cotransporter 2A Cause Idiopathic Infantile Hypercalcemia. J Am Soc Nephrol 27(2), 604-614. doi: 10.1681/asn.2014101025.	1	Disease of metabolism
XB-ART-50724	26005867	DOID:0060145	pain agnosia	FALSE	FALSE	FALSE	FALSE	FALSE	FALSE	FALSE	FALSE	TRUE	FALSE	FALSE	FALSE	FALSE	FALSE	FALSE	FALSE	FALSE	FALSE	Chen, Y.C., Auer-Grumbach, M., Matsukawa, S., Zitzelsberger, M., Themistocleous, A.C., Strom, T.M., et al. (2015). Transcriptional regulator PRDM12 is essential for human pain perception. Nat Genet 47(7), 803-808. doi: 10.1038/ng.3308.	1	Disease of mental health
XB-ART-50701	24980796	DOID:445	Bartter disease	FALSE	FALSE	FALSE	FALSE	FALSE	FALSE	TRUE	FALSE	FALSE	FALSE	FALSE	FALSE	FALSE	FALSE	FALSE	FALSE	FALSE	FALSE	Bollepalli, M.K., Fowler, P.W., Rapedius, M., Shang, L., Sansom, M.S., Tucker, S.J., et al. (2014). State-dependent network connectivity determines gating in a K+ channel. Structure 22(7), 1037-1046. doi: 10.1016/j.str.2014.04.018.	1	Urinary system disease
XB-ART-50648	25931457	DOID:11612	polycystic ovary syndrome	FALSE	FALSE	FALSE	FALSE	FALSE	FALSE	FALSE	FALSE	FALSE	FALSE	FALSE	FALSE	FALSE	FALSE	FALSE	FALSE	FALSE	FALSE	Hua, J., Xu, B., Yang, Y., Ban, R., Iqbal, F., Cooke, H.J., et al. (2015). Follicle Online: an integrated database of follicle assembly, development and ovulation. Database (Oxford) 2015, bav036. doi: 10.1093/database/bav036.	0	Syndrome
XB-ART-50648	25931457	DOID:5426	premature ovarian failure	FALSE	FALSE	FALSE	FALSE	FALSE	FALSE	FALSE	FALSE	FALSE	FALSE	FALSE	FALSE	TRUE	FALSE	FALSE	FALSE	FALSE	FALSE	Hua, J., Xu, B., Yang, Y., Ban, R., Iqbal, F., Cooke, H.J., et al. (2015). Follicle Online: an integrated database of follicle assembly, development and ovulation. Database (Oxford) 2015, bav036. doi: 10.1093/database/bav036.	1	Endocrine system disease
XB-ART-50648	25931457	DOID:5426	premature ovarian failure	FALSE	FALSE	FALSE	FALSE	FALSE	FALSE	FALSE	FALSE	FALSE	FALSE	FALSE	FALSE	FALSE	FALSE	FALSE	TRUE	FALSE	FALSE	Hua, J., Xu, B., Yang, Y., Ban, R., Iqbal, F., Cooke, H.J., et al. (2015). Follicle Online: an integrated database of follicle assembly, development and ovulation. Database (Oxford) 2015, bav036. doi: 10.1093/database/bav036.	1	Reproductive system disease
XB-ART-50616	24794859	DOID:0050793	short QT syndrome	FALSE	FALSE	FALSE	FALSE	FALSE	TRUE	FALSE	FALSE	FALSE	FALSE	FALSE	FALSE	FALSE	FALSE	FALSE	FALSE	FALSE	FALSE	Ambrosini, E., Sicca, F., Brignone, M.S., D'Adamo, M.C., Napolitano, C., Servettini, I., et al. (2014). Genetically induced dysfunctions of Kir2.1 channels: implications for short QT3 syndrome and autism-epilepsy phenotype. Hum Mol Genet 23(18), 4875-4886. doi: 10.1093/hmg/ddu201.	1	Cardiovascular system disease
XB-ART-50616	24794859	DOID:0060041	autism spectrum disorder	FALSE	FALSE	FALSE	FALSE	FALSE	FALSE	FALSE	FALSE	TRUE	FALSE	FALSE	FALSE	FALSE	FALSE	FALSE	FALSE	FALSE	FALSE	Ambrosini, E., Sicca, F., Brignone, M.S., D'Adamo, M.C., Napolitano, C., Servettini, I., et al. (2014). Genetically induced dysfunctions of Kir2.1 channels: implications for short QT3 syndrome and autism-epilepsy phenotype. Hum Mol Genet 23(18), 4875-4886. doi: 10.1093/hmg/ddu201.	1	Disease of mental health
XB-ART-50616	24794859	DOID:1826	epilepsy	TRUE	FALSE	FALSE	FALSE	FALSE	FALSE	FALSE	FALSE	FALSE	FALSE	FALSE	FALSE	FALSE	FALSE	FALSE	FALSE	FALSE	FALSE	Ambrosini, E., Sicca, F., Brignone, M.S., D'Adamo, M.C., Napolitano, C., Servettini, I., et al. (2014). Genetically induced dysfunctions of Kir2.1 channels: implications for short QT3 syndrome and autism-epilepsy phenotype. Hum Mol Genet 23(18), 4875-4886. doi: 10.1093/hmg/ddu201.	1	Nervous system disease
XB-ART-50590	25891934	DOID:0070153	hereditary sensory and autonomic neuropathy type 8	TRUE	FALSE	FALSE	FALSE	FALSE	FALSE	FALSE	FALSE	FALSE	FALSE	FALSE	FALSE	FALSE	FALSE	FALSE	FALSE	FALSE	FALSE	Nagy, V., Cole, T., Van Campenhout, C., Khoung, T.M., Leung, C., Vermeiren, S., et al. (2015). The evolutionarily conserved transcription factor PRDM12 controls sensory neuron development and pain perception. Cell Cycle 14(12), 1799-1808. doi: 10.1080/15384101.2015.1036209.	1	Nervous system disease
XB-ART-50566	25916202	DOID:0060164	pain disorder	FALSE	FALSE	FALSE	FALSE	FALSE	FALSE	FALSE	FALSE	TRUE	FALSE	FALSE	FALSE	FALSE	FALSE	FALSE	FALSE	FALSE	FALSE	Goral, R.O., Leipold, E., Nematian-Ardestani, E., and Heinemann, S.H. (2015). Heterologous expression of NaV1.9 chimeras in various cell systems. Pflugers Arch 467(12), 2423-2435. doi: 10.1007/s00424-015-1709-1.	1	Disease of mental health
XB-ART-50505	24161619	DOID:12365	malaria	FALSE	FALSE	FALSE	FALSE	FALSE	FALSE	FALSE	FALSE	FALSE	FALSE	FALSE	FALSE	FALSE	FALSE	TRUE	FALSE	FALSE	FALSE	Beckman, M.L., Pramod, A.B., Perley, D., and Henry, L.K. (2014). Stereoselective inhibition of serotonin transporters by antimalarial compounds. Neurochem Int 73, 98-106. doi: 10.1016/j.neuint.2013.10.009.	1	Disease by infectious agent
XB-ART-50504	24214974	DOID:0050994	episodic ataxia type 6	TRUE	FALSE	FALSE	FALSE	FALSE	FALSE	FALSE	FALSE	FALSE	FALSE	FALSE	FALSE	FALSE	FALSE	FALSE	FALSE	FALSE	FALSE	Hotzy, J., Schneider, N., Kovermann, P., and Fahlke, C. (2013). Mutating a conserved proline residue within the trimerization domain modifies Na+ binding to excitatory amino acid transporters and associated conformational changes. J Biol Chem 288(51), 36492-36501. doi: 10.1074/jbc.M113.489385.	1	Nervous system disease
XB-ART-50493	24635129	DOID:1826	epilepsy	TRUE	FALSE	FALSE	FALSE	FALSE	FALSE	FALSE	FALSE	FALSE	FALSE	FALSE	FALSE	FALSE	FALSE	FALSE	FALSE	FALSE	FALSE	Gilchrist, J., Dutton, S., Diaz-Bustamante, M., McPherson, A., Olivares, N., Kalia, J., et al. (2014). Nav1.1 modulation by a novel triazole compound attenuates epileptic seizures in rodents. ACS Chem Biol 9(5), 1204-1212. doi: 10.1021/cb500108p.	1	Nervous system disease
XB-ART-50451	25250572	DOID:4479	pseudohypoaldosteronism	FALSE	FALSE	FALSE	FALSE	FALSE	FALSE	TRUE	FALSE	FALSE	FALSE	FALSE	FALSE	FALSE	FALSE	FALSE	FALSE	FALSE	FALSE	McCormick, J.A., Yang, C.L., Zhang, C., Davidge, B., Blankenstein, K.I., Terker, A.S., et al. (2014). Hyperkalemic hypertension-associated cullin 3 promotes WNK signaling by degrading KLHL3. J Clin Invest 124(11), 4723-4736. doi: 10.1172/jci76126.	1	Urinary system disease
XB-ART-50378	25698756	DOID:0060041	autism spectrum disorder	FALSE	FALSE	FALSE	FALSE	FALSE	FALSE	FALSE	FALSE	TRUE	FALSE	FALSE	FALSE	FALSE	FALSE	FALSE	FALSE	FALSE	FALSE	James, E.J., Gu, J., Ramirez-Vizcarrondo, C.M., Hasan, M., Truszkowski, T.L., Tan, Y., et al. (2015). Valproate-induced neurodevelopmental deficits in Xenopus laevis tadpoles. J Neurosci 35(7), 3218-3229. doi: 10.1523/jneurosci.4050-14.2015.	1	Disease of mental health
XB-ART-50376	25704511	DOID:162	cancer	FALSE	FALSE	FALSE	FALSE	TRUE	FALSE	FALSE	FALSE	FALSE	FALSE	FALSE	FALSE	FALSE	FALSE	FALSE	FALSE	FALSE	FALSE	Hardwick, L.J., and Philpott, A. (2015). An oncologists friend: How Xenopus contributes to cancer research. Dev Biol 408(2), 180-187. doi: 10.1016/j.ydbio.2015.02.003.	1	Cancer
XB-ART-50372	25712132	DOID:0060305	megalocornea	TRUE	FALSE	FALSE	FALSE	FALSE	FALSE	FALSE	FALSE	FALSE	FALSE	FALSE	FALSE	FALSE	FALSE	FALSE	FALSE	FALSE	FALSE	Pfirrmann, T., Emmerich, D., Ruokonen, P., Quandt, D., Buchen, R., Fischer-Zirnsak, B., et al. (2015). Molecular mechanism of CHRDL1-mediated X-linked megalocornea in humans and in Xenopus model. Hum Mol Genet 24(11), 3119-3132. doi: 10.1093/hmg/ddv063.	1	Nervous system disease
XB-ART-50372	25712132	DOID:0060305	megalocornea	FALSE	FALSE	TRUE	FALSE	FALSE	FALSE	FALSE	FALSE	FALSE	FALSE	FALSE	FALSE	FALSE	FALSE	FALSE	FALSE	FALSE	FALSE	Pfirrmann, T., Emmerich, D., Ruokonen, P., Quandt, D., Buchen, R., Fischer-Zirnsak, B., et al. (2015). Molecular mechanism of CHRDL1-mediated X-linked megalocornea in humans and in Xenopus model. Hum Mol Genet 24(11), 3119-3132. doi: 10.1093/hmg/ddv063.	1	Sensory system disease
XB-ART-50364	25724657	DOID:12271	aniridia	TRUE	FALSE	FALSE	FALSE	FALSE	FALSE	FALSE	FALSE	FALSE	FALSE	FALSE	FALSE	FALSE	FALSE	FALSE	FALSE	FALSE	FALSE	Nakayama, T., Fisher, M., Nakajima, K., Odeleye, A.O., Zimmerman, K.B., Fish, M.B., et al. (2015). Xenopus pax6 mutants affect eye development and other organ systems, and have phenotypic similarities to human aniridia patients. Dev Biol 408(2), 328-344. doi: 10.1016/j.ydbio.2015.02.012.	1	Nervous system disease
XB-ART-50364	25724657	DOID:12271	aniridia	FALSE	FALSE	TRUE	FALSE	FALSE	FALSE	FALSE	FALSE	FALSE	FALSE	FALSE	FALSE	FALSE	FALSE	FALSE	FALSE	FALSE	FALSE	Nakayama, T., Fisher, M., Nakajima, K., Odeleye, A.O., Zimmerman, K.B., Fish, M.B., et al. (2015). Xenopus pax6 mutants affect eye development and other organ systems, and have phenotypic similarities to human aniridia patients. Dev Biol 408(2), 328-344. doi: 10.1016/j.ydbio.2015.02.012.	1	Sensory system disease
XB-ART-50331	25848696	DOID:552	pneumonia	FALSE	FALSE	FALSE	FALSE	FALSE	FALSE	FALSE	FALSE	FALSE	FALSE	FALSE	FALSE	FALSE	FALSE	FALSE	FALSE	FALSE	TRUE	Walentek, P., Beyer, T., Hagenlocher, C., Muller, C., Feistel, K., Schweickert, A., et al. (2015). ATP4a is required for development and function of the Xenopus mucociliary epidermis - a potential model to study proton pump inhibitor-associated pneumonia. Dev Biol 408(2), 292-304. doi: 10.1016/j.ydbio.2015.03.013.	1	Respiratory system disease
XB-ART-50313	25866890	DOID:13328	diabetic cataract	TRUE	FALSE	FALSE	FALSE	FALSE	FALSE	FALSE	FALSE	FALSE	FALSE	FALSE	FALSE	FALSE	FALSE	FALSE	FALSE	FALSE	FALSE	Ben Messaoud, N., Yue, J., Valent, D., Katzarova, I., and Lopez, J.M. (2015). Osmostress-induced apoptosis in Xenopus oocytes: role of stress protein kinases, calpains and Smac/DIABLO. PLoS One 10(4), e0124482. doi: 10.1371/journal.pone.0124482.	1	Nervous system disease
XB-ART-50313	25866890	DOID:13328	diabetic cataract	FALSE	FALSE	TRUE	FALSE	FALSE	FALSE	FALSE	FALSE	FALSE	FALSE	FALSE	FALSE	FALSE	FALSE	FALSE	FALSE	FALSE	FALSE	Ben Messaoud, N., Yue, J., Valent, D., Katzarova, I., and Lopez, J.M. (2015). Osmostress-induced apoptosis in Xenopus oocytes: role of stress protein kinases, calpains and Smac/DIABLO. PLoS One 10(4), e0124482. doi: 10.1371/journal.pone.0124482.	1	Sensory system disease
XB-ART-50313	25866890	DOID:8947	diabetic retinopathy	TRUE	FALSE	FALSE	FALSE	FALSE	FALSE	FALSE	FALSE	FALSE	FALSE	FALSE	FALSE	FALSE	FALSE	FALSE	FALSE	FALSE	FALSE	Ben Messaoud, N., Yue, J., Valent, D., Katzarova, I., and Lopez, J.M. (2015). Osmostress-induced apoptosis in Xenopus oocytes: role of stress protein kinases, calpains and Smac/DIABLO. PLoS One 10(4), e0124482. doi: 10.1371/journal.pone.0124482.	1	Nervous system disease
XB-ART-50313	25866890	DOID:8947	diabetic retinopathy	FALSE	FALSE	TRUE	FALSE	FALSE	FALSE	FALSE	FALSE	FALSE	FALSE	FALSE	FALSE	FALSE	FALSE	FALSE	FALSE	FALSE	FALSE	Ben Messaoud, N., Yue, J., Valent, D., Katzarova, I., and Lopez, J.M. (2015). Osmostress-induced apoptosis in Xenopus oocytes: role of stress protein kinases, calpains and Smac/DIABLO. PLoS One 10(4), e0124482. doi: 10.1371/journal.pone.0124482.	1	Sensory system disease
XB-ART-50246	25786414	DOID:769	neuroblastoma	TRUE	FALSE	FALSE	FALSE	FALSE	FALSE	FALSE	FALSE	FALSE	FALSE	FALSE	FALSE	FALSE	FALSE	FALSE	FALSE	FALSE	FALSE	Wylie, L.A., Hardwick, L.J., Papkovskaia, T.D., Thiele, C.J., and Philpott, A. (2015). Ascl1 phospho-status regulates neuronal differentiation in a Xenopus developmental model of neuroblastoma. Dis Model Mech 8(5), 429-441. doi: 10.1242/dmm.018630.	1	Nervous system disease
XB-ART-50246	25786414	DOID:769	neuroblastoma	FALSE	FALSE	FALSE	FALSE	TRUE	FALSE	FALSE	FALSE	FALSE	FALSE	FALSE	FALSE	FALSE	FALSE	FALSE	FALSE	FALSE	FALSE	Wylie, L.A., Hardwick, L.J., Papkovskaia, T.D., Thiele, C.J., and Philpott, A. (2015). Ascl1 phospho-status regulates neuronal differentiation in a Xenopus developmental model of neuroblastoma. Dis Model Mech 8(5), 429-441. doi: 10.1242/dmm.018630.	1	Cancer
XB-ART-50235	25775405	DOID:219	colon cancer	FALSE	FALSE	FALSE	FALSE	TRUE	FALSE	FALSE	FALSE	FALSE	FALSE	FALSE	FALSE	FALSE	FALSE	FALSE	FALSE	FALSE	FALSE	Fonseca, B.F., Predes, D., Cerqueira, D.M., Reis, A.H., Amado, N.G., Cayres, M.C., et al. (2015). Derricin and derricidin inhibit Wnt/beta-catenin signaling and suppress colon cancer cell growth in vitro. PLoS One 10(3), e0120919. doi: 10.1371/journal.pone.0120919.	1	Cancer
XB-ART-50235	25775405	DOID:219	colon cancer	FALSE	FALSE	FALSE	FALSE	FALSE	FALSE	FALSE	FALSE	FALSE	FALSE	FALSE	TRUE	FALSE	FALSE	FALSE	FALSE	FALSE	FALSE	Fonseca, B.F., Predes, D., Cerqueira, D.M., Reis, A.H., Amado, N.G., Cayres, M.C., et al. (2015). Derricin and derricidin inhibit Wnt/beta-catenin signaling and suppress colon cancer cell growth in vitro. PLoS One 10(3), e0120919. doi: 10.1371/journal.pone.0120919.	1	Gastrointestinal system disease
XB-ART-50210	25744725	DOID:1459	hypothyroidism	FALSE	FALSE	FALSE	FALSE	FALSE	FALSE	FALSE	FALSE	FALSE	FALSE	FALSE	FALSE	TRUE	FALSE	FALSE	FALSE	FALSE	FALSE	Buchholz, D.R. (2015). More similar than you think: Frog metamorphosis as a model of human perinatal endocrinology. Dev Biol 408(2), 188-195. doi: 10.1016/j.ydbio.2015.02.018.	1	Endocrine system disease
XB-ART-50210	25744725	DOID:28	endocrine system disease	FALSE	FALSE	FALSE	FALSE	FALSE	FALSE	FALSE	FALSE	FALSE	FALSE	FALSE	FALSE	TRUE	FALSE	FALSE	FALSE	FALSE	FALSE	Buchholz, D.R. (2015). More similar than you think: Frog metamorphosis as a model of human perinatal endocrinology. Dev Biol 408(2), 188-195. doi: 10.1016/j.ydbio.2015.02.018.	1	Endocrine system disease
XB-ART-50207	25746216	DOID:437	myasthenia gravis	TRUE	FALSE	FALSE	FALSE	FALSE	FALSE	FALSE	FALSE	FALSE	FALSE	FALSE	FALSE	FALSE	FALSE	FALSE	FALSE	FALSE	FALSE	Yeo, H.L., Lim, J.Y., Fukami, Y., Yuki, N., and Lee, C.W. (2015). Using Xenopus tissue cultures for the study of myasthenia gravis pathogenesis. Dev Biol 408(2), 244-251. doi: 10.1016/j.ydbio.2015.02.017.	1	Nervous system disease
XB-ART-50207	25746216	DOID:437	myasthenia gravis	FALSE	FALSE	FALSE	TRUE	FALSE	FALSE	FALSE	FALSE	FALSE	FALSE	FALSE	FALSE	FALSE	FALSE	FALSE	FALSE	FALSE	FALSE	Yeo, H.L., Lim, J.Y., Fukami, Y., Yuki, N., and Lee, C.W. (2015). Using Xenopus tissue cultures for the study of myasthenia gravis pathogenesis. Dev Biol 408(2), 244-251. doi: 10.1016/j.ydbio.2015.02.017.	1	Musculoskeletal system disease
XB-ART-50207	25746216	DOID:437	myasthenia gravis	FALSE	FALSE	FALSE	FALSE	FALSE	FALSE	FALSE	FALSE	FALSE	FALSE	FALSE	FALSE	FALSE	TRUE	FALSE	FALSE	FALSE	FALSE	Yeo, H.L., Lim, J.Y., Fukami, Y., Yuki, N., and Lee, C.W. (2015). Using Xenopus tissue cultures for the study of myasthenia gravis pathogenesis. Dev Biol 408(2), 244-251. doi: 10.1016/j.ydbio.2015.02.017.	1	Immune system disease
XB-ART-50172	25547341	DOID:10763	hypertension	FALSE	FALSE	FALSE	FALSE	FALSE	TRUE	FALSE	FALSE	FALSE	FALSE	FALSE	FALSE	FALSE	FALSE	FALSE	FALSE	FALSE	FALSE	Morton, S.K., Chaston, D.J., Howitt, L., Heisler, J., Nicholson, B.J., Fairweather, S., et al. (2015). Loss of functional endothelial connexin40 results in exercise-induced hypertension in mice. Hypertension 65(3), 662-669. doi: 10.1161/hypertensionaha.114.04578.	1	Cardiovascular system disease
XB-ART-50167	25655935	DOID:0060224	atrial fibrillation	FALSE	FALSE	FALSE	FALSE	FALSE	TRUE	FALSE	FALSE	FALSE	FALSE	FALSE	FALSE	FALSE	FALSE	FALSE	FALSE	FALSE	FALSE	Rinne, S., Kiper, A.K., Schlichthorl, G., Dittmann, S., Netter, M.F., Limberg, S.H., et al. (2015). TASK-1 and TASK-3 may form heterodimers in human atrial cardiomyocytes. J Mol Cell Cardiol 81, 71-80. doi: 10.1016/j.yjmcc.2015.01.017.	1	Cardiovascular system disease
XB-ART-50162	25401298	DOID:891	progressive myoclonus epilepsy	TRUE	FALSE	FALSE	FALSE	FALSE	FALSE	FALSE	FALSE	FALSE	FALSE	FALSE	FALSE	FALSE	FALSE	FALSE	FALSE	FALSE	FALSE	Muona, M., Berkovic, S.F., Dibbens, L.M., Oliver, K.L., Maljevic, S., Bayly, M.A., et al. (2015). A recurrent de novo mutation in KCNC1 causes progressive myoclonus epilepsy. Nat Genet 47(1), 39-46. doi: 10.1038/ng.3144.	1	Nervous system disease
XB-ART-50159	25681536	DOID:0050635	alternating hemiplegia of childhood	TRUE	FALSE	FALSE	FALSE	FALSE	FALSE	FALSE	FALSE	FALSE	FALSE	FALSE	FALSE	FALSE	FALSE	FALSE	FALSE	FALSE	FALSE	Li, M., Jazayeri, D., Corry, B., McSweeney, K.M., Heinzen, E.L., Goldstein, D.B., et al. (2015). A functional correlate of severity in alternating hemiplegia of childhood. Neurobiol Dis 77, 88-93. doi: 10.1016/j.nbd.2015.02.002.	1	Nervous system disease
XB-ART-50115	25503389	DOID:10652	Alzheimer's disease	TRUE	FALSE	FALSE	FALSE	FALSE	FALSE	FALSE	FALSE	FALSE	FALSE	FALSE	FALSE	FALSE	FALSE	FALSE	FALSE	FALSE	FALSE	Terry, A.V., Jr., Callahan, P.M., and Bertrand, D. (2015). R-(+) and S-(-) isomers of cotinine augment cholinergic responses in vitro and in vivo. J Pharmacol Exp Ther 352(2), 405-418. doi: 10.1124/jpet.114.219881.	1	Nervous system disease
XB-ART-50113	25516973	DOID:0060340	ciliopathy	FALSE	TRUE	FALSE	FALSE	FALSE	FALSE	FALSE	FALSE	FALSE	FALSE	FALSE	FALSE	FALSE	FALSE	FALSE	FALSE	FALSE	FALSE	Epting, D., Slanchev, K., Boehlke, C., Hoff, S., Loges, N.T., Yasunaga, T., et al. (2015). The Rac1 regulator ELMO controls basal body migration and docking in multiciliated cells through interaction with Ezrin. Development 142(1), 174-184. doi: 10.1242/dev.112250.	1	Genetic disease
XB-ART-50089	25601449	DOID:162	cancer	FALSE	FALSE	FALSE	FALSE	TRUE	FALSE	FALSE	FALSE	FALSE	FALSE	FALSE	FALSE	FALSE	FALSE	FALSE	FALSE	FALSE	FALSE	Haynes-Gimore, N., Banach, M., Brown, E., Dawes, R., Edholm, E.S., Kim, M., et al. (2015). Semi-solid tumor model in Xenopus laevis/gilli cloned tadpoles for intravital study of neovascularization, immune cells and melanophore infiltration. Dev Biol 408(2), 205-212. doi: 10.1016/j.ydbio.2015.01.003.	1	Cancer
XB-ART-50073	25646081	DOID:162	cancer	FALSE	FALSE	FALSE	FALSE	TRUE	FALSE	FALSE	FALSE	FALSE	FALSE	FALSE	FALSE	FALSE	FALSE	FALSE	FALSE	FALSE	FALSE	Chernet, B.T., Fields, C., and Levin, M. (2014). Long-range gap junctional signaling controls oncogene-mediated tumorigenesis in Xenopus laevis embryos. Front Physiol 5, 519. doi: 10.3389/fphys.2014.00519.	1	Cancer
XB-ART-49929	23578822	DOID:83	cataract	TRUE	FALSE	FALSE	FALSE	FALSE	FALSE	FALSE	FALSE	FALSE	FALSE	FALSE	FALSE	FALSE	FALSE	FALSE	FALSE	FALSE	FALSE	Abplanalp, J., Laczko, E., Philp, N.J., Neidhardt, J., Zuercher, J., Braun, P., et al. (2013). The cataract and glucosuria associated monocarboxylate transporter MCT12 is a new creatine transporter. Hum Mol Genet 22(16), 3218-3226. doi: 10.1093/hmg/ddt175.	1	Nervous system disease
XB-ART-49929	23578822	DOID:83	cataract	FALSE	FALSE	TRUE	FALSE	FALSE	FALSE	FALSE	FALSE	FALSE	FALSE	FALSE	FALSE	FALSE	FALSE	FALSE	FALSE	FALSE	FALSE	Abplanalp, J., Laczko, E., Philp, N.J., Neidhardt, J., Zuercher, J., Braun, P., et al. (2013). The cataract and glucosuria associated monocarboxylate transporter MCT12 is a new creatine transporter. Hum Mol Genet 22(16), 3218-3226. doi: 10.1093/hmg/ddt175.	1	Sensory system disease
XB-ART-49919	23797420	DOID:0060871	autosomal dominant keratitis-ichthyosis-deafness syndrome	FALSE	TRUE	FALSE	FALSE	FALSE	FALSE	FALSE	FALSE	FALSE	FALSE	FALSE	FALSE	FALSE	FALSE	FALSE	FALSE	FALSE	FALSE	Lopez, W., Gonzalez, J., Liu, Y., Harris, A.L., and Contreras, J.E. (2013). Insights on the mechanisms of Ca(2+) regulation of connexin26 hemichannels revealed by human pathogenic mutations (D50N/Y). J Gen Physiol 142(1), 23-35. doi: 10.1085/jgp.201210893.	1	Genetic disease
XB-ART-49899	24024827	DOID:1682	congenital heart disease	FALSE	FALSE	FALSE	FALSE	FALSE	TRUE	FALSE	FALSE	FALSE	FALSE	FALSE	FALSE	FALSE	FALSE	FALSE	FALSE	FALSE	FALSE	Kaltenbrun, E., Greco, T.M., Slagle, C.E., Kennedy, L.M., Li, T., Cristea, I.M., et al. (2013). A Gro/TLE-NuRD corepressor complex facilitates Tbx20-dependent transcriptional repression. J Proteome Res 12(12), 5395-5409. doi: 10.1021/pr400818c.	1	Cardiovascular system disease
XB-ART-49880	24159188	DOID:13533	osteopetrosis	FALSE	FALSE	FALSE	TRUE	FALSE	FALSE	FALSE	FALSE	FALSE	FALSE	FALSE	FALSE	FALSE	FALSE	FALSE	FALSE	FALSE	FALSE	Sartelet, A., Stauber, T., Coppieters, W., Ludwig, C.F., Fasquelle, C., Druet, T., et al. (2014). A missense mutation accelerating the gating of the lysosomal Cl-/H+-exchanger ClC-7/Ostm1 causes osteopetrosis with gingival hamartomas in cattle. Dis Model Mech 7(1), 119-128. doi: 10.1242/dmm.012500.	1	Musculoskeletal system disease
XB-ART-49793	24782544	DOID:0060171	Dravet syndrome	TRUE	FALSE	FALSE	FALSE	FALSE	FALSE	FALSE	FALSE	FALSE	FALSE	FALSE	FALSE	FALSE	FALSE	FALSE	FALSE	FALSE	FALSE	Lacroix, J.J., Hyde, H.C., Campos, F.V., and Bezanilla, F. (2014). Moving gating charges through the gating pore in a Kv channel voltage sensor. Proc Natl Acad Sci U S A 111(19), E1950-1959. doi: 10.1073/pnas.1406161111.	1	Nervous system disease
XB-ART-49793	24782544	DOID:2843	long QT syndrome	FALSE	FALSE	FALSE	FALSE	FALSE	TRUE	FALSE	FALSE	FALSE	FALSE	FALSE	FALSE	FALSE	FALSE	FALSE	FALSE	FALSE	FALSE	Lacroix, J.J., Hyde, H.C., Campos, F.V., and Bezanilla, F. (2014). Moving gating charges through the gating pore in a Kv channel voltage sensor. Proc Natl Acad Sci U S A 111(19), E1950-1959. doi: 10.1073/pnas.1406161111.	1	Cardiovascular system disease
XB-ART-49740	24952150	DOID:0060224	atrial fibrillation	FALSE	FALSE	FALSE	FALSE	FALSE	TRUE	FALSE	FALSE	FALSE	FALSE	FALSE	FALSE	FALSE	FALSE	FALSE	FALSE	FALSE	FALSE	Schmidt, C., Wiedmann, F., Langer, C., Tristram, F., Anand, P., Wenzel, W., et al. (2014). Cloning, functional characterization, and remodeling of K2P3.1 (TASK-1) potassium channels in a porcine model of atrial fibrillation and heart failure. Heart Rhythm 11(10), 1798-1805. doi: 10.1016/j.hrthm.2014.06.020.	1	Cardiovascular system disease
XB-ART-49699	25194674	DOID:13580	cholestasis	FALSE	FALSE	FALSE	FALSE	FALSE	FALSE	FALSE	FALSE	FALSE	FALSE	FALSE	TRUE	FALSE	FALSE	FALSE	FALSE	FALSE	FALSE	Lieu, T., Jayaweera, G., Zhao, P., Poole, D.P., Jensen, D., Grace, M., et al. (2014). The bile acid receptor TGR5 activates the TRPA1 channel to induce itch in mice. Gastroenterology 147(6), 1417-1428. doi: 10.1053/j.gastro.2014.08.042.	1	Gastrointestinal system disease
XB-ART-49662	25274813	DOID:10584	retinitis pigmentosa	TRUE	FALSE	FALSE	FALSE	FALSE	FALSE	FALSE	FALSE	FALSE	FALSE	FALSE	FALSE	FALSE	FALSE	FALSE	FALSE	FALSE	FALSE	Tam, B.M., Noorwez, S.M., Kaushal, S., Kono, M., and Moritz, O.L. (2014). Photoactivation-induced instability of rhodopsin mutants T4K and T17M in rod outer segments underlies retinal degeneration in X. laevis transgenic models of retinitis pigmentosa. J Neurosci 34(40), 13336-13348. doi: 10.1523/jneurosci.1655-14.2014.	1	Nervous system disease
XB-ART-49662	25274813	DOID:10584	retinitis pigmentosa	FALSE	FALSE	TRUE	FALSE	FALSE	FALSE	FALSE	FALSE	FALSE	FALSE	FALSE	FALSE	FALSE	FALSE	FALSE	FALSE	FALSE	FALSE	Tam, B.M., Noorwez, S.M., Kaushal, S., Kono, M., and Moritz, O.L. (2014). Photoactivation-induced instability of rhodopsin mutants T4K and T17M in rod outer segments underlies retinal degeneration in X. laevis transgenic models of retinitis pigmentosa. J Neurosci 34(40), 13336-13348. doi: 10.1523/jneurosci.1655-14.2014.	1	Sensory system disease
XB-ART-49632	25359775	DOID:219	colon cancer	FALSE	FALSE	FALSE	FALSE	TRUE	FALSE	FALSE	FALSE	FALSE	FALSE	FALSE	FALSE	FALSE	FALSE	FALSE	FALSE	FALSE	FALSE	Amado, N.G., Predes, D., Fonseca, B.F., Cerqueira, D.M., Reis, A.H., Dudenhoeffer, A.C., et al. (2014). Isoquercitrin suppresses colon cancer cell growth in vitro by targeting the Wnt/beta-catenin signaling pathway. J Biol Chem 289(51), 35456-35467. doi: 10.1074/jbc.M114.621599.	1	Cancer
XB-ART-49632	25359775	DOID:219	colon cancer	FALSE	FALSE	FALSE	FALSE	FALSE	FALSE	FALSE	FALSE	FALSE	FALSE	FALSE	TRUE	FALSE	FALSE	FALSE	FALSE	FALSE	FALSE	Amado, N.G., Predes, D., Fonseca, B.F., Cerqueira, D.M., Reis, A.H., Dudenhoeffer, A.C., et al. (2014). Isoquercitrin suppresses colon cancer cell growth in vitro by targeting the Wnt/beta-catenin signaling pathway. J Biol Chem 289(51), 35456-35467. doi: 10.1074/jbc.M114.621599.	1	Gastrointestinal system disease
XB-ART-49629	25366493	DOID:6364	migraine	TRUE	FALSE	FALSE	FALSE	FALSE	FALSE	FALSE	FALSE	FALSE	FALSE	FALSE	FALSE	FALSE	FALSE	FALSE	FALSE	FALSE	FALSE	Enyedi, P., and Czirjak, G. (2015). Properties, regulation, pharmacology, and functions of the K(2)p channel, TRESK. Pflugers Arch 467(5), 945-958. doi: 10.1007/s00424-014-1634-8.	1	Nervous system disease
XB-ART-49607	25386646	DOID:10652	Alzheimer's disease	TRUE	FALSE	FALSE	FALSE	FALSE	FALSE	FALSE	FALSE	FALSE	FALSE	FALSE	FALSE	FALSE	FALSE	FALSE	FALSE	FALSE	FALSE	Vingtdeux, V., Tanis, J.E., Chandakkar, P., Zhao, H., Dreses-Werringloer, U., Campagne, F., et al. (2014). Effect of the CALHM1 G330D and R154H human variants on the control of cytosolic Ca2+ and Abeta levels. PLoS One 9(11), e112484. doi: 10.1371/journal.pone.0112484.	1	Nervous system disease
XB-ART-49584	25420144	DOID:1826	epilepsy	TRUE	FALSE	FALSE	FALSE	FALSE	FALSE	FALSE	FALSE	FALSE	FALSE	FALSE	FALSE	FALSE	FALSE	FALSE	FALSE	FALSE	FALSE	Simons, C., Rash, L.D., Crawford, J., Ma, L., Cristofori-Armstrong, B., Miller, D., et al. (2015). Mutations in the voltage-gated potassium channel gene KCNH1 cause Temple-Baraitser syndrome and epilepsy. Nat Genet 47(1), 73-77. doi: 10.1038/ng.3153.	1	Nervous system disease
XB-ART-49453	25260629	DOID:1485	cystic fibrosis	FALSE	TRUE	FALSE	FALSE	FALSE	FALSE	FALSE	FALSE	FALSE	FALSE	FALSE	FALSE	FALSE	FALSE	FALSE	FALSE	FALSE	FALSE	Tan, C.D., Hobbs, C., Sameni, M., Sloane, B.F., Stutts, M.J., and Tarran, R. (2014). Cathepsin B contributes to Na+ hyperabsorption in cystic fibrosis airway epithelial cultures. J Physiol 592(23), 5251-5268. doi: 10.1113/jphysiol.2013.267286.	1	Genetic disease
XB-ART-49439	25224408	DOID:9351	diabetes mellitus	FALSE	FALSE	FALSE	FALSE	FALSE	FALSE	FALSE	TRUE	FALSE	FALSE	FALSE	FALSE	FALSE	FALSE	FALSE	FALSE	FALSE	FALSE	Williams, D.B. (2015). Inhibitory effects of insulin on GABAA currents modulated by the GABAA alpha subunit. J Recept Signal Transduct Res 35(6), 516-522. doi: 10.3109/10799893.2014.960935.	1	Disease of metabolism
XB-ART-49438	25229253	DOID:0060871	autosomal dominant keratitis-ichthyosis-deafness syndrome	FALSE	TRUE	FALSE	FALSE	FALSE	FALSE	FALSE	FALSE	FALSE	FALSE	FALSE	FALSE	FALSE	FALSE	FALSE	FALSE	FALSE	FALSE	Levit, N.A., Sellitto, C., Wang, H.Z., Li, L., Srinivas, M., Brink, P.R., et al. (2015). Aberrant connexin26 hemichannels underlying keratitis-ichthyosis-deafness syndrome are potently inhibited by mefloquine. J Invest Dermatol 135(4), 1033-1042. doi: 10.1038/jid.2014.408.	1	Genetic disease
XB-ART-49433	25209246	DOID:0060179	Renpenning syndrome	FALSE	FALSE	FALSE	FALSE	FALSE	FALSE	FALSE	FALSE	TRUE	FALSE	FALSE	FALSE	FALSE	FALSE	FALSE	FALSE	FALSE	FALSE	Iwasaki, Y., and Thomsen, G.H. (2014). The splicing factor PQBP1 regulates mesodermal and neural development through FGF signaling. Development 141(19), 3740-3751. doi: 10.1242/dev.106658.	1	Disease of mental health
[truncated: 596 more rows]
